# Supplementary material for: De Novo and Rare Variants at Multiple Loci Support the Oligogenic Origins of Atrioventricular Septal Heart Defects
Source: PubMed Central journal article supplement (PMC4825975; doi:10.1371/journal.pgen.1005963), 2016-04-08

Figure S2. A Quantile-Quantile Plot of p-values derived from the SKAT linear weight test of 86 subnetworks in 100 AVSD cases compared to 533 controls.

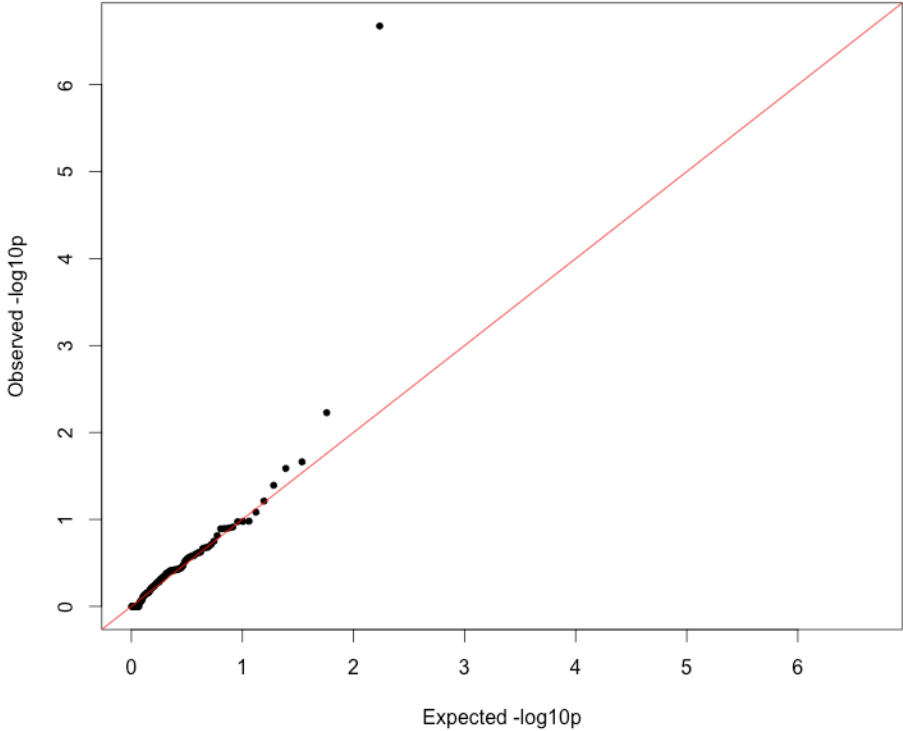

Supplement: pgen.1005963.s003.pdf [file pgen.1005963.s003.pdf]
