# Supplementary material for: De Novo and Rare Variants at Multiple Loci Support the Oligogenic Origins of Atrioventricular Septal Heart Defects
Source: PubMed Central journal article supplement (PMC4825975; doi:10.1371/journal.pgen.1005963), 2016-04-08
Supplement: pgen.1005963.s004.pdf [file pgen.1005963.s004.pdf]

**Figure S3. A Multiple Protein Alignment of the DNA Binding Domains of NR1D1 and NR1D2 Shows Sequence Identity Surrounding a Conserved Arginine Residue.**

```
NR1D2  90  HSGVTKFSGMVLLCKVCGDVASGFHYGVHACEGCKGFFRRSIQQNIQYKKCLKNENC SIM 149
NR1D1 119  TSNITKLNMGVLLCKVCGDVASGFHYGVHACEGCKGFFRRSIQQNIQYKRCLKNENC SIV 178
      *  :*: :.*****:*****:
NR1D2 150  RMNRNRCQQCRFKKCLSVGMSRDAVRFGRIPKREKQRMLIEMQSAMKTMMN SQFSGHLQN 209
NR1D1 179  RINRNRCQQCRFKKCLSVGMSRDAVRFGRIPKREKQRMLAEMQSAMNLANNO-LSSQCPL 237
      *:***** *****:  * . :* .:
```
