# Supplementary material for: De Novo and Rare Variants at Multiple Loci Support the Oligogenic Origins of Atrioventricular Septal Heart Defects
Source: PubMed Central journal article supplement (PMC4825975; doi:10.1371/journal.pgen.1005963), 2016-04-08
Supplement: pgen.1005963.s005.pdf [file pgen.1005963.s005.pdf]

**Figure S4. Diagrams of Nucleic Acid Reagents for the In Vitro Cell Culture Experiments for the Discovered R175W NR1D2 Experiment.**

a.

|                             |     |     |          |     |     |     |     |
|-----------------------------|-----|-----|----------|-----|-----|-----|-----|
| <b>WT Human DNA</b>         | GCT | GTT | CGG      | TTT | GGT | CGT | ATT |
| <b>WT Human Protein</b>     | A   | V   | R        | F   | G   | R   | I   |
| <b>mutant Human DNA</b>     | GCT | GTT | TGG      | TTT | GGT | CGT | ATT |
| <b>mutant Human Protein</b> | A   | V   | <b>W</b> | F   | G   | R   | I   |
| <b>WT Mouse DNA</b>         | GCT | GTT | CGA      | TTT | GGC | CGA | ATT |
| <b>WT Mouse Protein</b>     | A   | V   | R        | F   | G   | R   | I   |
| <b>mutant Mouse DNA</b>     | GCT | GTT | TGG      | TTT | GGC | CGA | ATT |
| <b>mutant Mouse Protein</b> | A   | V   | <b>W</b> | F   | G   | R   | I   |

b.

CCCGGGAGTGA**AGGTCATTAGGTCAT**CATAAGTTT**AGGTC**AAG**AGGTC**ATAGTTTGCTC**AGGTC**  
**AGAAGGTC**AGAGTAATGTA**AGGTC**ACT**AGGTC**AGTGAGTAATGTA**AGGTC**AAT**AGGTC**AATTAA  
 CCCGGG
