# Supplementary material for: De Novo and Rare Variants at Multiple Loci Support the Oligogenic Origins of Atrioventricular Septal Heart Defects
Source: PubMed Central journal article supplement (PMC4825975; doi:10.1371/journal.pgen.1005963), 2016-04-08
Supplement: pgen.1005963.s006.pdf [file pgen.1005963.s006.pdf]

## Script S1. Example command line for read mapping and variant calling using the RTG software package

```
rtg-core-3.3.2/rtg map \  
-l PCGC_1131_A.bam_1.fq -r PCGC_1131_A.bam_2.fq -o ./PCGC_1131_A \  
-t ./hg19/SDF/ -T 48 -F fastq -q sanger --bam \  
--sam-rg "@RG\tID:PCGC_1131_A\tSM:PCGC_1131_A\tPL:ILLUMINA" \  
--bed-regions=./Nimblegen.v2.Tiled.44.1.bed
```

```
rtg-core-3.3.2/rtg family -o ./PCGC_1131_family \  
-t ./hg19/SDF/ --father PCGC_1131_B --mother PCGC_1131_A \  
--son PCGC_1131_P -m illumina \  
--avr-model illumina-pe-1000g-phase2.avr \  
../PCGC_1131_P/mated.bam ../PCGC_1131_P/unmated.bam \  
../PCGC_1131_B/mated.bam ../PCGC_1131_B/unmated.bam \  
../PCGC_1131_A/mated.bam ../PCGC_1131_A/unmated.bam \  

```

```
rtg-core-3.3.2/rtg vcffilter \  
-I /PCGC_1131_individual/snps.vcf.gz \  
-o /PCGC_1131_individual/PCGC_1131_individual.vcf \  
--include-bed=./Nimblegen.v2.Tiled.44.1.bed
```
