# Supplementary material for: De Novo and Rare Variants at Multiple Loci Support the Oligogenic Origins of Atrioventricular Septal Heart Defects
Source: PubMed Central journal article supplement (PMC4825975; doi:10.1371/journal.pgen.1005963), 2016-04-08
Supplement: pgen.1005963.s008.pdf [file pgen.1005963.s008.pdf]

**Table S1. Raw Sensitivity of RTG is Greater than BWA/GATK Before Filtering**

|                 | <b>TP detected</b> | <b>False Negatives</b> | <b>Raw Sensitivity</b> | <b>False Negative Rate</b> |
|-----------------|--------------------|------------------------|------------------------|----------------------------|
| <b>RTG</b>      | 20,901             | 3,833                  | <i>0.845</i>           | <i>0.155</i>               |
| <b>BWA/GATK</b> | 19,771             | 4,963                  | <i>0.799</i>           | <i>0.201</i>               |
