# Supplementary material for: De Novo and Rare Variants at Multiple Loci Support the Oligogenic Origins of Atrioventricular Septal Heart Defects
Source: PubMed Central journal article supplement (PMC4825975; doi:10.1371/journal.pgen.1005963), 2016-04-08
Supplement: pgen.1005963.s009.pdf [file pgen.1005963.s009.pdf]

**Table S2. Proband Ethnicity & Enrollment by Site**

| <b>Site</b>                     | <b>Trios</b> | <b>Singletons</b> |
|---------------------------------|--------------|-------------------|
| <b>University of Washington</b> |              |                   |
| African American                | -            | -                 |
| Asian                           | 1            | -                 |
| Caucasian                       | 17           | -                 |
| Native American (AMR)           | -            | 1                 |
| <b>University of Iowa</b>       |              |                   |
| African American                | -            | -                 |
| Asian                           | -            | -                 |
| Caucasian                       | 26           | 4                 |
| Native American (AMR)           | -            | -                 |
| <b>PCGC</b>                     |              |                   |
| African American                | 2            | 2                 |
| Asian                           | 1            | -                 |
| Caucasian                       | -            | 4                 |
| Native American (AMR)           | 12           | -                 |
| <b>University of Toronto</b>    |              |                   |
| African American                | -            | -                 |
| Asian                           | -            | -                 |
| Caucasian                       | -            | 87                |
| Native American (AMR)           | -            | 2                 |
|                                 |              |                   |
| <b>TOTAL</b>                    | <b>59</b>    | <b>100</b>        |
