# Supplementary material for: De Novo and Rare Variants at Multiple Loci Support the Oligogenic Origins of Atrioventricular Septal Heart Defects
Source: PubMed Central journal article supplement (PMC4825975; doi:10.1371/journal.pgen.1005963), 2016-04-08
Supplement: pgen.1005963.s010.pdf [file pgen.1005963.s010.pdf]

**Table S3. Sequencing and Genotyping Parameters of Case and Control Subjects**

|                                      | <b>AVSD Trios</b> | <b>Control Trios</b> | <b>AVSD Singletons</b> | <b>Control Singletons</b> |
|--------------------------------------|-------------------|----------------------|------------------------|---------------------------|
| Number of Individuals                | 177               | 177                  | 100                    | 533                       |
| median Ti/Tv                         | 2.40              | 2.17                 | 3.10                   | 3.12                      |
| median Het/Hom                       | 1.84              | 2.10                 | 1.47                   | 1.54                      |
| median Read Depth                    | 41.73             | 111.18               | 54.50                  | 47.58                     |
| median % phased genotypes (probands) | 89.9%             | 89.0%                | n/a                    | n/a                       |
