# Supplementary material for: De Novo and Rare Variants at Multiple Loci Support the Oligogenic Origins of Atrioventricular Septal Heart Defects
Source: PubMed Central journal article supplement (PMC4825975; doi:10.1371/journal.pgen.1005963), 2016-04-08
Supplement: pgen.1005963.s011.pdf [file pgen.1005963.s011.pdf]

**Table S4. Complete List of 710 variants in 399 genes from 59 Trios with AVSD Displaying Rare Inheritance**

| Proband | Gene         | Inheritance           | Residual Variation Intoleranc e Score | Exonic Function            | Amino Acid Change                      | Minor Allele Frequency EXAC | dbSNP138    | PolyPhen2 Score | PolyPhen2 Prediction | GERP Score | Chromosome | Position  | Ref       | Alt     | Quality Score | Paternal Genotype | Maternal Genotype | Proband Genotype |
|---------|--------------|-----------------------|---------------------------------------|----------------------------|----------------------------------------|-----------------------------|-------------|-----------------|----------------------|------------|------------|-----------|-----------|---------|---------------|-------------------|-------------------|------------------|
| 17      | MARCH7       | compound heterozygous | 86.299835                             | nonsynonymous SNV          | uc010for.3.c.C599T.p.T200M             | 0.02                        | rs76774368  | 0               | B                    | 1.22       | chr2       | 160604514 | C         | T       | 1935.4        | 0/0               | 0/1               | 0/1              |
| 17      | MARCH7       | compound heterozygous | 86.299835                             | nonsynonymous SNV          | uc010for.3.c.G853A.p.A285T             | 0.02                        | rs141659304 | 0               | A                    | -3.38      | chr2       | 160604768 | C         | T       | 710.2         | 0/1               | 0/1               | 0/1              |
| 2036    | ABCA3        | compound heterozygous | 3.7096013                             | nonsynonymous SNV          | uc010bpb.1.c.A3610G.p.S1204G           | 8.54E-04                    | rs35089233  | 0.836           | P                    | 4.89       | chr16      | 2334358   | T         | C       | 1064.9        | 0/0               | 0/1               | 0/1              |
| 2036    | ABCA3        | compound heterozygous | 3.7096013                             | nonsynonymous SNV          | uc002ypl.1.c.G863A.p.R288Q             | 5.96E-03                    | rs117603931 | 0               | B                    | -8.84      | chr16      | 2369592   | C         | T       | 622.6         | 0/1               | 0/1               | 0/1              |
| 60      | ABCA4        | compound heterozygous | 86.305732                             | nonsynonymous SNV          | uc010dqb.1.c.G505C.p.V169I             | 2.73E-03                    | rs41292677  | 0.953           | D                    | 5.08       | chr1       | 94467548  | C         | G       | 588           | 0/1               | 0/1               | 0/1              |
| 60      | ABCA4        | compound heterozygous | 86.305732                             | nonsynonymous SNV          | uc010dqb.3.c.A3845G.p.Y1262C           | 2.62E-03                    | rs145625174 | 0.92            | D                    | 3.63       | chr1       | 94526174  | C         | G       | 499           | 0/1               | 0/1               | 0/1              |
| 2812    | ABCA4        | compound heterozygous | 86.305732                             | nonsynonymous SNV          | uc001dqb.3.c.G6529A.p.D2177N           | 0.01                        | rs18005529  | 0.004           | B                    | 5.03       | chr1       | 94463617  | C         | T       | 483.2         | 0/0               | 0/1               | 0/1              |
| 313     | ABHD14A.ACY1 | homozygous rare       | NA                                    | nonsynonymous SNV          | uc001dqb.3.c.A466G.p.I156V             | 1.30E-03                    | rs62646863  | 0               | B                    | -1.46      | chr1       | 94568675  | T         | C       | 2879.7        | 0/1               | 0/1               | 0/1              |
| 155     | ABO          | homozygous rare       | NA                                    | nonframeshift substitution | uc011bea.2.c.G182A.p.R61H              | 8.20E-03                    | rs41292350  |                 |                      |            | chr3       | 52012320  | G         | A       | 935.1         | 0/1               | 0/1               | 0/1              |
| 2020    | ACACB        | compound heterozygous | 1.7751828                             | nonsynonymous SNV          | ABO:uc004oda.1.exon4.c.188_189GC       |                             |             |                 |                      |            | chr9       | 136135237 | AT        | GC      | 3700.4        | 0/1               | 0/1               | 0/1              |
| 2020    | ACACB        | compound heterozygous | 1.7751828                             | nonsynonymous SNV          | uc0010cc.3.c.A2503G.p.M835V            | 0.02                        | rs17848802  | 0.558           | P                    | 4.01       | chr12      | 109634834 | A         | G       | 1300.1        | 0/1               | 0/1               | 0/1              |
| 2020    | ACACB        | compound heterozygous | 1.7751828                             | nonsynonymous SNV          | uc010xsm.2.c.G1984A.p.V662M            | 5.07E-04                    | rs138562469 | 0.995           | D                    | 5.16       | chr12      | 109690904 | A         | G       | 3649.8        | 0/1               | 0/1               | 0/1              |
| 2812    | ACACB        | compound heterozygous | 1.7751828                             | nonsynonymous SNV          | uc0010cc.3.c.A2503G.p.M835V            | 0.02                        | rs17848802  | 0.558           | P                    | 4.01       | chr12      | 109634834 | A         | G       | 891.8         | 0/1               | 0/1               | 0/1              |
| 2812    | ACACB        | compound heterozygous | 1.7751828                             | nonsynonymous SNV          | uc0010cc.3.c.A3845G.p.Y1262C           | 6.59E-04                    | rs149793040 | 0.92            | D                    | 4.1        | chr12      | 109661672 | A         | G       | 2718.8        | 0/0               | 0/1               | 0/1              |
| 3761    | ACACB        | compound heterozygous | 1.7751828                             | nonsynonymous SNV          | uc0010cc.3.c.A2503G.p.M835V            | 0.02                        | rs17848802  | 0.558           | P                    | 4.01       | chr12      | 109634834 | A         | G       | 763.3         | 0/1               | 0/1               | 0/1              |
| 3761    | ACACB        | compound heterozygous | 1.7751828                             | nonsynonymous SNV          | uc010xsm.2.c.C1109T.p.A370V            | 0.036                       | rs10980303  | 0.036           | B                    | 4.32       | chr12      | 109680303 | C         | T       | 1039.7        | 0/0               | 0/1               | 0/1              |
| 313     | ACTN2        | homozygous rare       | 2.4652041                             | frameshift deletion        | uc001hyg.2.c.95del.C.P32fs             |                             |             |                 |                      |            | chr1       | 236899903 | CC        | C       | 728.4         | 0/1               | 0/1               | 0/1              |
| 3721    | ADAM17       | compound heterozygous | 82.778957                             | nonsynonymous SNV          | uc010ewz.3.c.T290G.p.L97R              | 0.003                       | rs19290520  | 0.003           | B                    | 1.61       | chr2       | 9630520   | A         | C       | 2144.5        | 0/0               | 0/1               | 0/1              |
| 3721    | ADAM17       | compound heterozygous | 82.778957                             | nonsynonymous SNV          | uc010ewz.3.c.C269T.p.S90L              | 0.01                        | rs57596712  | 0.003           | B                    | 1.66       | chr2       | 9630541   | G         | A       | 2781.7        | 0/1               | 0/1               | 0/1              |
| 2035    | ADAM28       | compound heterozygous | 86.854211                             | nonsynonymous SNV          | uc010lba.3.c.G122A.p.C41Y              | 2.11E-04                    | rs145612420 | 1               | D                    | 5.4        | chr8       | 24187586  | G         | A       | 1867.6        | 0/1               | 0/1               | 0/1              |
| 2035    | ADAM28       | compound heterozygous | 86.854211                             | nonsynonymous SNV          | uc010lba.3.c.T1166C.p.L389P            | 1.33E-03                    | rs147942437 | 0               | B                    | -8.9       | chr8       | 24208750  | T         | C       | 2277.9        | 0/1               | 0/1               | 0/1              |
| 2037    | ADAMTS15     | homozygous rare       | 84.754659                             | nonsynonymous SNV          | uc010hsc.2.c.G597C.p.E133Q             | 2.70E-03                    | rs18526910  | 0.988           | D                    | 3.08       | chr11      | 130319265 | G         | C       | 976.5         | 0/1               | 0/1               | 0/1              |
| 2028    | AFAP12       | homozygous rare       | 87.296532                             | nonsynonymous SNV          | uc001lba.3.c.G281A.p.DC1T              | 0.24E-02                    | rs45726190  | 0.026           | B                    | 4.87       | chr1       | 6529319   | A         | G       | 6293.9        | 0/1               | 0/1               | 0/1              |
| 313     | AFAP12       | homozygous rare       | 87.296532                             | nonsynonymous SNV          | uc001lbn.3.c.G46A.p.D16N               | 9.77E-03                    | rs41300231  | 0.243           | P                    | 4.63       | chr10      | 116100461 | C         | T       | 949.1         | 0/1               | 0/1               | 0/1              |
| 3731    | AFM1         | homozygous rare       | 79.464496                             | nonsynonymous SNV          | uc003hbh.3.c.G1184A.p.R395H            | 0.02                        | rs41265665  | 0.013           | B                    | 4.28       | chr4       | 74361142  | A         | G       | 5345.4        | 0/1               | 0/1               | 0/1              |
| 7952    | AFP          | compound heterozygous | 71.567587                             | nonsynonymous SNV          | uc003hgz.1.c.A559C.p.K187Q             | 0.01                        | rs37565619  | 0.977           | D                    | 3.81       | chr4       | 74308089  | A         | C       | 2227.4        | 0/1               | 0/1               | 0/1              |
| 7952    | AFP          | compound heterozygous | 71.567587                             | nonsynonymous SNV          | uc011cbp.1.c.C80G.p.T27S               | 1.87E-04                    | rs139295532 | 0.235           | P                    | 5.09       | chr4       | 74310754  | C         | G       | 3774.8        | 0/0               | 0/1               | 0/1              |
| 3781    | AGA          | compound heterozygous | 86.712668                             | nonsynonymous SNV          | uc003iua.2.c.C313A.p.L105I             | 9.56E-03                    | rs76491548  | 0.282           | P                    | 5.58       | chr4       | 178360811 | C         | T       | 2118.6        | 0/1               | 0/1               | 0/1              |
| 3781    | AGA          | compound heterozygous | 86.712668                             | nonsynonymous SNV          | uc003iua.2.c.G34T.p.V12L               | 0.01                        | rs74626221  | 0               | B                    | -9.86      | chr4       | 178363496 | C         | A       | 383.4         | 0/1               | 0/1               | 0/1              |
| 152     | AH11         | homozygous rare       | 78.066761                             | nonsynonymous SNV          | uc003agq.3.c.C838T.p.R280W             | 0.02                        | rs15312995  |                 |                      |            | chr6       | 135751024 | A         | G       | 2032.4        | 0/1               | 0/1               | 0/1              |
| 23      | AIF1L        | homozygous rare       | 81.216089                             | nonsynonymous SNV          | uc011fmc.1.c.A388G.p.M130V             | 0.02                        | rs11284413  | 0.705           | P                    | 4.19       | chr9       | 133956529 | A         | G       | 3259.5        | 0/1               | 0/1               | 0/1              |
| 3761    | AIF1L        | compound heterozygous | 81.216089                             | nonsynonymous SNV          | uc011fmc.1.c.T185C.p.T477I             | 2.16E-03                    | rs146896674 | 0.85            | P                    | 4.57       | chr9       | 133989793 | G         | T       | 2251.9        | 0/0               | 0/1               | 0/1              |
| 3761    | AIF1L        | compound heterozygous | 81.216089                             | nonsynonymous SNV          | uc011fmc.1.c.A388G.p.M130V             | 0.02                        | rs11284413  | 0.705           | P                    | 4.19       | chr9       | 133956529 | A         | G       | 926.1         | 0/0               | 0/1               | 0/1              |
| 2037    | AKAP4        | homozygous rare       | 84.613116                             | nonsynonymous SNV          | uc004dou.1.c.G860A.p.G072B             | 5.04E-03                    | rs141513690 | 0.072           | B                    | 2.46       | chrX       | 49958477  | C         | T       | 1123.9        | 0/1               | 0/1               | 0/1              |
| 2002    | AKAP6        | compound heterozygous | 71.650153                             | nonsynonymous SNV          | uc001wq.3.c.A1672G.p.N588D             | 6.82E-03                    | rs35210906  | 0.463           | P                    | -6.88      | chr14      | 33015531  | A         | G       | 643.1         | 0/1               | 0/1               | 0/1              |
| 2002    | AKAP6        | compound heterozygous | 71.650153                             | nonsynonymous SNV          | uc001wq.3.c.G4564A.p.V152I             | 0.02                        | rs34711402  | 0.001           | B                    | 2.84       | chr14      | 33291583  | A         | G       | 1124.9        | 0/0               | 0/1               | 0/1              |
| 152     | AKAP9        | compound heterozygous | 68.447747                             | nonsynonymous SNV          | uc003iud.4.c.C139T.p.H47Y              | 8.09E-03                    | rs35669569  | 0               | B                    | 0.0934     | chr7       | 91603115  | C         | T       | 1165          | 0/0               | 0/1               | 0/1              |
| 152     | AKAP9        | compound heterozygous | 68.447747                             | nonsynonymous SNV          | uc003iud.3.c.G2467C.p.E823Q            | 1.63E-05                    | rs41265665  | 0.884           | D                    | 3.25       | chr7       | 91643622  | G         | C       | 644.4         | 0/1               | 0/1               | 0/1              |
| 2013    | AKNA1D       | homozygous rare       | 89.110403                             | nonsynonymous SNV          | uc001dwa.3.c.C311T.p.A104V             | 0.02                        | rs17621411  | 0.068           | B                    | -1.16      | chr1       | 109394976 | A         | G       | 3744.6        | 0/1               | 0/1               | 0/1              |
| 3761    | ALDH1A1      | compound heterozygous | 67.521821                             | nonsynonymous SNV          | uc001lba.3.c.C1430A.p.T477I            | 3.91E-03                    | rs41340361  | 0.911           | D                    | 4.47       | chr1       | 6529319   | A         | G       | 792.8         | 0/1               | 0/1               | 0/1              |
| 3781    | ALDH1A1      | compound heterozygous | 67.521821                             | nonsynonymous SNV          | uc001lbb.3.c.K126I.p.C421R             | 1.62E-03                    | rs149414160 | 0.959           | D                    | 4.53       | chr1       | 19202886  | A         | G       | 476           | 0/0               | 0/1               | 0/1              |
| 17      | ALG8         | compound heterozygous | 79.464496                             | nonsynonymous SNV          | uc0010yz.1.c.T1316C.p.I439T            | 0.02                        | rs17825668  | 0.002           | B                    | 3.06       | chr11      | 77815059  | A         | G       | 674.3         | 0/0               | 0/1               | 0/1              |
| 17      | ALG8         | compound heterozygous | 79.464496                             | nonsynonymous SNV          | uc0010yz.1.c.G803A.p.R268Q             | 0.01                        | rs61995925  | 0.998           | D                    | 5.22       | chr11      | 77823791  | T         | G       | 242.7         | 0/1               | 0/1               | 0/1              |
| 151     | AMPD1        | compound heterozygous | 59.170795                             | nonsynonymous SNV          | uc001eff.2.c.A188T.p.L627F             | 1.55E-04                    | rs200717164 | 0.997           | D                    | 3.32       | chr1       | 115217379 | T         | A       | 312.9         | 0/1               | 0/1               | 0/1              |
| 151     | AMPD1        | compound heterozygous | 59.170795                             | nonsynonymous SNV          | uc001eff.2.c.A947T.p.K316I             | 0.02                        | rs34526199  | 0.993           | D                    | 5.58       | chr1       | 115222237 | T         | A       | 526.1         | 0/1               | 0/1               | 0/1              |
| 146     | AMZ1         | compound heterozygous | 69.839585                             | nonsynonymous SNV          | uc003smr.1.c.T680C.p.V227A             | 1.97E-03                    | rs150799683 | 0.021           | B                    | -4.8       | chr7       | 2748787   | T         | C       | 646.1         | 0/1               | 0/1               | 0/1              |
| 146     | AMZ1         | compound heterozygous | 69.839585                             | nonsynonymous SNV          | uc011jwa.1.c.C815A.p.S205R             | 3.05E-03                    | rs148177744 | 0.002           | B                    | -4.11      | chr7       | 2752383   | C         | T       | 682.9         | 0/1               | 0/1               | 0/1              |
| 2022    | ANKRD11      | compound heterozygous | 60.093619                             | nonsynonymous SNV          | uc002fmc.1.c.C7519A.p.G2057K           | 4.86E-05                    | rs41265665  | 0.98            | D                    | 3.94       | chr6       | 86341551  | G         | C       | 791.9         | 0/0               | 0/1               | 0/1              |
| 2022    | ANKRD11      | compound heterozygous | 60.093619                             | nonsynonymous SNV          | uc002fmc.1.c.C3848T.p.T283M            | 6.91E-04                    | rs144673419 | 0.33            | P                    | 5.16       | chr16      | 99348973  | G         | C       | 375.2         | 0/0               | 0/1               | 0/1              |
| 749     | ANKRD12      | compound heterozygous | 45.364473                             | nonsynonymous SNV          | uc010dxc.1.c.C713G.p.T238S             | 0.02                        | rs7243088   | 0               | B                    | 4.5        | chr18      | 9254857   | A         | G       | 789.6         | 0/0               | 0/1               | 0/1              |
| 749     | ANKRD12      | compound heterozygous | 45.364473                             | nonframeshift deletion     | uc010dxc.1.c.1668_1670del.p.556_557del |                             |             |                 |                      |            | chr18      | 9255811   | ATGA      | A       | 928.1         | 0/1               | 0/1               | 0/1              |
| 313     | ANKRD31      | homozygous rare       | NA                                    | nonframeshift deletion     | uc003kdc.2.c.752_754del.p.251_252del   |                             |             |                 |                      |            | chr5       | 74491718  | ATCA      | A       | 1475.1        | 0/1               | 0/1               | 0/1              |
| 1346    | AOC2         | homozygous rare       | 44.102383                             | nonsynonymous SNV          | uc002bit.3.c.G818A.p.R273Q             | 7.37E-03                    | rs35508987  | 0.042           | B                    | -0.175     | chr17      | 40997461  | G         | A       | 3650.7        | 0/1               | 0/1               | 0/1              |
| 3781    | APBA3        | compound heterozygous | 89.266336                             | nonsynonymous SNV          | uc002ypl.1.c.C236T.p.A79V              | 6.04E-03                    | rs11556574  | 0.005           | B                    | -1.69      | chr19      | 3760027   | G         | A       | 731.2         | 0/1               | 0/1               | 0/1              |
| 3781    | APBA3        | compound heterozygous | 89.266336                             | nonsynonymous SNV          | uc002ypl.1.c.G48A.p.M16I               | 2.12E-04                    | rs200523433 | 0.04            | B                    | 4.5        | chr19      | 3760215   | T         | C       | 535.3         | 0/0               | 0/1               | 0/1              |
| 2036    | APOBEC3H     | homozygous rare       | 85.527247                             | nonframeshift substitution | uc021wps.1.c.45_53GCGCTAPOBEC3H        |                             |             |                 |                      |            | chr22      | 39496328  | CAAGCGCCG | CGCGCCT | 65.0          | 0/1               | 0/1               | 0/1              |
| 123     | APOBEC3H     | homozygous rare       | 85.527247                             | nonframeshift substitution | uc021wps.1.c.45_53GCGCTAPOBEC3H        |                             |             |                 |                      |            | chr22      | 39496328  | CAAGCGCCG | CGCGCCT | 4561.5        | 0/1               | 0                 |                  |

| Proband | Gene     | Inheritance           | Residual Variation Intoleranc e Score | Exonic Function            | Amino Acid Change                        | Minor Allele Frequency EXAC | dbSNP138    | PolyPhen2 Score | PolyPhen2 Prediction | GERP Score | Chromosome | Position  | Ref  | Alt    | Quality Score | Paternal Genotype | Maternal Genotype | Proband Genotype |
|---------|----------|-----------------------|---------------------------------------|----------------------------|------------------------------------------|-----------------------------|-------------|-----------------|----------------------|------------|------------|-----------|------|--------|---------------|-------------------|-------------------|------------------|
| 135     | C6orf132 | compound heterozygous | NA                                    | nonsynonymous SNV          | uc0030rw.2:c.22480T>P.R827L              |                             |             |                 |                      |            | chr8       | 42071370  | G    | A      | 420.8         | 0/1               | 0/1               | 1/0              |
| 135     | C6orf132 | compound heterozygous | NA                                    | nonsynonymous SNV          | uc0030rw.2:c.T778G>P.S260A               | 0.02                        | rs11758539  |                 |                      |            | chr8       | 42074872  | A    | C      | 486.7         | 0/1               | 0/1               | 0/1              |
| 2008    | C6orf186 | homozygous rare       | NA                                    | nonsynonymous SNV          | uc0030pb.2:c.A143G>P.H48R                | 0.02                        | rs41288584  | 0.977           | D                    | 1.91       | chr6       | 110620177 | T    | C      | 334.1         | 0/1               | 0/1               | 1/1              |
| 1131    | C8orf46  | homozygous rare       | 38.281434                             | nonsynonymous SNV          | uc0030qk.3:c.G235T>P.A79S                | 0.02                        | rs61736270  | 0.015           | B                    | 0.125      | chr8       | 67417718  | T    | C      | 834           | 0/1               | 0/1               | 1/1              |
| 10      | C8orf58  | compound heterozygous | 87.137297                             | nonsynonymous SNV          | uc0030kc.3:c.C661T>P.P221S               | 7.55E-03                    | rs147403979 | 0.479           | P                    | 0.876      | chr8       | 22459488  | C    | T      | 481.8         | 0/1               | 0/1               | 0/1              |
| 10      | C8orf58  | compound heterozygous | 87.137297                             | nonsynonymous SNV          | uc0030kc.3:c.C931T>P.R311W               | 0.02                        | rs117289616 | 0.003           | B                    | 0.395      | chr8       | 22460101  | T    | T      | 70.14         | 0/1               | 0/1               | 0/1              |
| 2026    | C9orf131 | compound heterozygous | 82.944091                             | nonsynonymous SNV          | uc0032vw.3:c.G45A>P.M15I                 | 0.02                        | rs61742471  | 0.08            | B                    | -3.07      | chr9       | 35042296  | C    | A      | 2025.5        | 0/1               | 0/1               | 0/1              |
| 151     | C9orf47  | homozygous rare       | NA                                    | nonsynonymous SNV          | uc0032zv.3:c.T155G>P.I518T               | 0.01                        | rs34368062  | 0.065           | B                    | -3.09      | chr9       | 35044398  | T    | C      | 1265.4        | 0/1               | 0/1               | 0/1              |
| 2010    | CACNA1C  | homozygous rare       | 1.5746638                             | nonsynonymous SNV          | uc0034aq.2:c.G44A>P.S144A                | 0.01                        | rs34421923  | 0.012           | B                    | 1.52       | chr9       | 91606912  | G    | A      | 314.4         | 0/1               | 0/1               | 1/1              |
| 60      | CACNA2D4 | homozygous rare       | 89.661477                             | nonsynonymous SNV          | uc001nqv.1:c.G168A>P.V55A1               |                             |             |                 |                      |            | chr12      | 2714881   | G    | A      | 1338.3        | 0/1               | 0/1               | 0/1              |
| 4405    | CAPN2    | homozygous rare       | 85.828025                             | nonsynonymous SNV          | uc001nqv.1:c.C266T>P.P69L                | 7.28E-03                    | rs61741336  |                 |                      |            | chr12      | 1906632   | G    | A      | 1304.6        | 0/1               | 0/1               | 0/1              |
| 3765    | CAPS2    | homozygous rare       | 67.303609                             | nonsynonymous SNV          | uc001thc.3:c.C34T>P.P12S                 | 6.03E-03                    | rs114318533 |                 |                      |            | chr1       | 223946945 | C    | T      | 1531.2        | 0/1               | 0/1               | 1/1              |
| 23      | CCDC159  | homozygous rare       | 53.509082                             | frameshift substitution    | uc001sxi.4:c.G418A>P.D140N               | 0.0023                      | rs117753158 | 0.005           | B                    | 0.356      | chr12      | 75687039  | C    | T      | 7175.2        | 0/1               | 0/1               | 1/1              |
| 3721    | CCDC165  | compound heterozygous | NA                                    | nonsynonymous SNV          | CCDC159:uc010xw.1:exon2:c.66_68AGCA      |                             |             |                 |                      |            | chr19      | 11456667  | GCG  | AGCA   | 2777.1        | 0/1               | 0/1               | 1/1              |
| 3721    | CCDC165  | compound heterozygous | NA                                    | nonsynonymous SNV          | uc002kns.2:c.A5G>P.E2G                   | 8.13E-06                    |             | 0.995           | D                    | 5.47       | chr18      | 8796234   | A    | C      | 1579.2        | 0/1               | 0/1               | 0/1              |
| 3721    | CCDC165  | compound heterozygous | NA                                    | nonsynonymous SNV          | uc002kns.2:c.C2676G>P.H89ZQ              | 8.72E-04                    | rs146312067 | 0.995           | D                    | -8.4       | chr18      | 8826164   | C    | G      | 999.8         | 0/1               | 0/1               | 0/1              |
| 151     | CCDC169  | compound heterozygous | NA                                    | nonsynonymous SNV          | uc001vpm.3:c.8872_8874del>P.N3597S       |                             |             |                 |                      |            | chr13      | 103392257 | C    | G      | 428.7         | 0/1               | 0/1               | 0/1              |
| 151     | CCDC169  | compound heterozygous | NA                                    | nonframeshift deletion     | uc001vpm.3:c.8872_8874del>P.N256_2958del |                             |             |                 |                      |            | chr13      | 103394172 | T    | CTTC   | 356.6         | 0/1               | 0/1               | 0/1              |
| 7952    | CCDC48   | compound heterozygous | NA                                    | nonsynonymous SNV          | uc011bkt.2:c.G1381T>P.A461S              | 1.22E-04                    | rs377018804 | 0.006           | B                    | 0.177      | chr3       | 128753104 | G    | T      | 1108.5        | 0/1               | 0/1               | 0/1              |
| 7952    | CCDC48   | compound heterozygous | NA                                    | nonsynonymous SNV          | uc011bkt.2:c.G1662C>P.E545D              | 0.01                        | rs75140996  | 0.004           | B                    | 4.044      | chr3       | 128758556 | G    | C      | 413.9         | 0/1               | 0/1               | 0/1              |
| 289     | CCDC88B  | compound heterozygous | 71.083982                             | nonsynonymous SNV          | uc001nzz.1:c.G1328A>P.R443Q              | 8.35E-03                    | rs143386417 | 0.695           | P                    | 2.15       | chr11      | 64112394  | G    | A      | 714.3         | 0/1               | 0/1               | 0/1              |
| 289     | CCDC88B  | compound heterozygous | 71.083982                             | nonsynonymous SNV          | uc001oab.1:c.C502T>P.R168C               | 0.0023                      | rs143386417 | 0.999           | D                    | 2.82       | chr11      | 64121552  | G    | C      | 379.9         | 0/1               | 0/1               | 0/1              |
| 3761    | CCDC88B  | compound heterozygous | 71.083982                             | nonsynonymous SNV          | uc001oaa.3:c.C284T>P.T95I                | 0.01                        | rs144037797 | 0.053           | B                    | -7.49      | chr11      | 64117106  | C    | C      | 630.1         | 0/1               | 0/1               | 0/1              |
| 3761    | CCDC88B  | compound heterozygous | 71.083982                             | nonsynonymous SNV          | uc001oac.3:c.G317C>P.R106P               | 3.90E-04                    | rs202018582 |                 |                      |            | chr11      | 64124205  | G    | C      | 315           | 0/1               | 0/1               | 0/1              |
| 123     | CNCL2    | compound heterozygous | 53.986892                             | nonsynonymous SNV          | uc001afi.2:c.C212G>P.T71S                | 0.02                        | rs17851391  | 0.016           | B                    | 1.39       | chr1       | 1334475   | C    | C      | 314.9         | 0/1               | 0/1               | 0/1              |
| 2013    | CNNT1    | compound heterozygous | 52.093654                             | nonsynonymous SNV          | uc009kz.2:c.C168G>P.D66E                 | 0.01                        | rs114112990 | 0.001           | B                    | -1.82      | chr1       | 1331919   | G    | T      | 1484.9        | 0/1               | 0/1               | 0/1              |
| 2013    | CNNT1    | compound heterozygous | 52.093654                             | nonsynonymous SNV          | uc009kz.2:c.G86A>P.R287H                 | 5.53E-04                    | rs61751602  | 0.991           | D                    | 4.82       | chr12      | 49087282  | C    | T      | 397.4         | 0/1               | 0/1               | 0/1              |
| 123     | CNNT1    | compound heterozygous | 52.093654                             | nonsynonymous SNV          | uc009kz.2:c.A817G>P.T273A                | 0.02                        | rs61751603  | 0.001           | B                    | -1.09      | chr12      | 49087325  | T    | C      | 526.1         | 0/1               | 0/1               | 0/1              |
| 2013    | CD1B     | homozygous rare       | 72.59967                              | nonsynonymous SNV          | uc001fhw.3:c.G409A>P.G137R               | 0.01                        | rs35841099  | 0.001           | B                    | -7.49      | chr1       | 158299840 | C    | T      | 2832.5        | 0/1               | 0/1               | 1/1              |
| 3731    | CD1E     | homozygous rare       | 60.56853                              | nonsynonymous SNV          | uc001ffy.3:c.A305G>P.H102R               | 5.13E-03                    | rs2873587   | 0.005           | B                    | 0.583      | chr1       | 158324413 | G    | A      | 1620.8        | 0/1               | 0/1               | 1/1              |
| 50      | CD2BP2   | compound heterozygous | 58.740269                             | nonsynonymous SNV          | uc002zhr.3:c.C785T>P.T262I               | 0.01                        | rs34391305  | 0.913           | D                    | 3.62       | chr16      | 30364712  | A    | G      | 1680.7        | 0/1               | 0/1               | 0/1              |
| 50      | CD2BP2   | compound heterozygous | 58.740269                             | nonsynonymous SNV          | uc002zhr.3:c.A262T>P.T88S                | 4.53E-03                    | rs139111996 | 0.995           | D                    | 4.93       | chr16      | 30365335  | T    | A      | 1092          | 0/1               | 0/1               | 0/1              |
| 2007    | CD300LD  | compound heterozygous | 72.22812                              | nonsynonymous SNV          | uc002jzk.2:c.A325G>P.T109A               | 2.28E-04                    | rs180816540 | 0.002           | B                    | 3.83       | chr17      | 72584704  | T    | C      | 3519.3        | 0/1               | 0/1               | 0/1              |
| 2007    | CD300LD  | compound heterozygous | 72.22812                              | nonsynonymous SNV          | uc002jzk.2:c.T142A>P.Y429I               | 6.35E-04                    | rs142719069 | 0.897           | D                    | -8.42      | chr17      | 72584967  | A    | A      | 2.136         | 0/1               | 0/1               | 0/1              |
| 2023    | CD7      | homozygous rare       | 81.481481                             | nonsynonymous SNV          | uc002kxi.1:c.G86A>P.R973H                | 0.02                        | rs113733263 | 0.973           | D                    | -3.84      | chr17      | 40273234  | T    | T      | 1937.7        | 0/1               | 0/1               | 1/1              |
| 14      | CDH5     | homozygous rare       | 7.5784383                             | nonframeshift substitution | CDH5:uc002eom.4:exon10:c.1550_1551CT     |                             |             |                 |                      |            | chr16      | 66432423  | TC   | CT     | 2902          | 0/1               | 0/1               | 1/1              |
| 2001    | CDK5RAP2 | homozygous rare       | 1.8895447                             | nonsynonymous SNV          | uc0040ke.3:c.G920A>P.G307E               | 0.02                        | rs34523498  | 0.981           | D                    | -0.892     | chr9       | 123205981 | C    | T      | 26859.6       | 0/1               | 0/1               | 1/1              |
| 50      | CDKL5    | homozygous rare       | 15.864591                             | nonsynonymous SNV          | uc0022bn.1:c.C1303T>P.R435C              | 1.79E-04                    | rs61753977  | 0.999           | D                    | 4.0        | chrX       | 18622374  | C    | T      | 1862.374      | 0/1               | 0/1               | 1/1              |
| 155     | CELSR2   | compound heterozygous | 2.1762208                             | nonsynonymous SNV          | uc001dwx.4:c.A3800G>P.H1267R             | 7.39E-03                    | rs138543788 | 0.998           | D                    | 4.4        | chr1       | 109801543 | A    | G      | 1520.5        | 0/1               | 0/1               | 0/1              |
| 155     | CELSR2   | compound heterozygous | 2.1762208                             | nonframeshift substitution | CELSR2:uc001dwx.4:exon16:c.6044_6045AA   |                             |             |                 |                      |            | chr1       | 109810200 | GG   | AA     | 852           | 0/1               | 0/1               | 0/1              |
| 2027    | CHD6     | compound heterozygous | 8.9112998                             | nonsynonymous SNV          | uc002kxa.1:c.C7165T>P.R239R              | 0.01                        | rs61752057  | 0.999           | D                    | 4.81       | chr20      | 40040870  | G    | A      | 942.3         | 0/1               | 0/1               | 0/1              |
| 2027    | CHD6     | compound heterozygous | 8.9112998                             | nonsynonymous SNV          | uc002kxa.1:c.G430A>P.R1434K              | 6.91E-04                    | rs140327030 | 0.245           | P                    | 4.59       | chr20      | 40053863  | C    | T      | 324.63        | 0/1               | 0/1               | 0/1              |
| 7952    | CHRD     | compound heterozygous | 15.326324                             | nonsynonymous SNV          | uc011br.2:c.C44C>P.S251I                 | 5.29E-04                    | rs15204264  | 0.951           | P                    | 3.28       | chr3       | 70254170  | T    | T      | 7025.417      | 0/1               | 0/1               | 0/1              |
| 7952    | CHRD     | compound heterozygous | 15.326323                             | nonsynonymous SNV          | uc011br.2:c.C1085T>P.T362I               | 2.36E-04                    | rs138569844 | 0.992           | D                    | 3.88       | chr3       | 184105726 | T    | T      | 479.8         | 0/1               | 0/1               | 0/1              |
| 60      | CLDN16   | homozygous rare       | 43.571597                             | frameshift substitution    | uc003fsi.3:c.165_166C>CLDN16             |                             |             |                 |                      |            | chr3       | 190106073 | GG   | C      | 3897.6        | 0/1               | 0/1               | 1/1              |
| 3731    | CLECA6   | homozygous rare       | 89.956358                             | nonsynonymous SNV          | uc001qum.1:c.G223C>P.A75P                | 1.30E-03                    | rs150852294 | 0.086           | B                    | 2.37       | chr12      | 8612294   | C    | C      | 4063.9        | 0/1               | 0/1               | 1/1              |
| 2023    | CLECL1   | homozygous rare       | 83.138712                             | frameshift insertion       | uc001qwi.3:c.153_154insAACTT>L51fs       |                             |             |                 |                      |            | chr12      | 9885708   | T    | TAAGTT | 6907.5        | 0/1               | 0/1               | 1/1              |
| 2037    | CNOT4    | homozygous rare       | 57.313046                             | nonsynonymous SNV          | uc003vss.3:c.C20G>P.A7G                  | 0.02                        | rs17480616  | 0.001           | B                    | 0.995      | chr7       | 135123060 | G    | C      | 6067.2        | 0/1               | 0/1               | 1/1              |
| 10      | CNR2     | homozygous rare       | 60.474168                             | nonframeshift substitution | uc021oij.1:c.188_189GG>CNR2              |                             |             |                 |                      |            | chr1       | 24201919  | TT   | CC     | 975.2         | 0/1               | 0/1               | 1/1              |
| 151     | CNR2     | homozygous rare       | 60.474168                             | nonframeshift substitution | uc021oij.1:c.188_189GG>CNR2              |                             |             |                 |                      |            | chr1       | 24201919  | TT   | CC     | 1185.1        | 0/1               | 0/1               | 1/1              |
| 17      | COL8     | homozygous rare       | 81.552253                             | nonframeshift deletion     | uc003jfp.4:c.G4_6del>P.C22_22del         |                             |             |                 |                      |            | chr7       | 51085923  | CTTC | C      | 1580.9        | 0/1               | 0/1               | 1/1              |
| 2007    | COL4A5   | homozygous rare       | 6.3163482                             | nonsynonymous SNV          | uc0040eb.1:c.G1039G>P.F347A              | 1.10E-03                    | rs104886164 | 0.745693        | NA                   | 1.75       | chrX       | 107846262 | CT   | A      | 1113.7        | 0/1               | 0/1               | 0/1              |
| 2812    | COL5A1   | compound heterozygous | 0.5248879                             | nonsynonymous SNV          | uc004dfe.3:c.G574A>P.D192N               | 0.02                        | rs138579182 | 0.32044         | NA                   | 3.29       | chr9       | 137593099 | G    | A      | 1520.3        | 0/1               | 0/1               | 0/1              |
| 2812    | COL5A1   | compound heterozygous | 0.5248879                             | nonsynonymous SNV          | uc004dfe.3:c.G4322A>P.G144E              | 0.02                        | rs478282    | NA              | 4.49                 | chr9       | 137710593  | G         | A    | 588.9  | 0/1           | 0/1               | 0/1               |                  |
| 2034    | COL6A2   | homozygous rare       | 8.2212786                             | nonsynonymous SNV          | uc0020zh.1:c.C1552T>P.P518S              | 8.83E-03                    | rs141166141 | 0.998           | D                    | 4.23       | chr21      | 47542052  | C    | T      | 3854.2        | 0/1               | 0/1               | 1/1              |
| 2007    | COL6A3   | compound heterozygous | 0.8610521                             | nonsynonymous SNV          | uc0020wv.2:c.G1291A>P.A431T              | 1.04E-03                    | rs114596320 | 0.391154        | C                    | 2.32       | chr2       | 238243350 | C    | T      | 912.4         | 0/1               | 0/1               | 0/1              |
| 2007    | COL6A3   | compound heterozygous | 0.8610521                             | nonsynonymous SNV          | uc002wvr.3:c.T257C>P.V86A                | 1.27E-03                    | rs116794756 | 0.697623        | NA                   | 5.15       | chr2       | 238289977 | A    | C      | 939.8         | 0/1               | 0/1               | 0/1              |
| 2033    | COL6A6   | homozygous rare       | NA                                    | nonsynonymous SNV          | uc010hw.1:c.T167C>P.M56T                 | 0.02                        | rs113396273 |                 |                      |            |            |           |      |        |               |                   |                   |                  |

| Proband | Gene     | Inheritance           | Residual Variation Intoleranc e Score | Exonic Function            | Amino Acid Change               | Minor Allele Frequency EXAC | dbSNP138     | PolyPhen2 Score | PolyPhen2 Prediction | GERP Score | Chromosome | Position  | Ref    | Alt    | Quality Score | Paternal Genotype | Maternal Genotype | Proband Genotype |
|---------|----------|-----------------------|---------------------------------------|----------------------------|---------------------------------|-----------------------------|--------------|-----------------|----------------------|------------|------------|-----------|--------|--------|---------------|-------------------|-------------------|------------------|
| 23      | DC583205 | homozygous rare       | NA                                    | nonsynonymous SNV          | uc010yph.1.c.C7527.p.P251L      | 0.02                        | rs1754918    |                 |                      |            | chr16      | 89300242  | C      | T      | 882.5         | 0/1               | 0/1               | 1/1              |
| 2022    | DYNC2H1  | compound heterozygous | 29.564756                             | nonsynonymous SNV          | uc001phn.1.c.G8881A.p.A2961T    | 1.79E-03                    | rs19958537   |                 |                      |            | chr11      | 103090699 | G      | A      | 2453.3        | 0/1               | 0/1               | 0/1              |
| 2022    | DYNC2H1  | compound heterozygous | 29.564756                             | nonsynonymous SNV          | uc009yx.1.c.G2704C.p.G902R      | 0.01                        | rs144717489  |                 |                      |            | chr11      | 103349922 | C      | G      | 3145.1        | 0/1               | 0/1               | 0/1              |
| 749     | DYNC2H1  | compound heterozygous | 29.564756                             | nonsynonymous SNV          | uc001phn.1.c.C4728C.p.N1576K    | 0.01                        | rs72989738   |                 |                      |            | chr11      | 103036743 | C      | C      | 1108.4        | 0/1               | 0/1               | 0/1              |
| 749     | DYNC2H1  | compound heterozygous | 29.564756                             | nonsynonymous SNV          | uc009yx.1.c.G2704C.p.G902R      | 0.01                        | rs144717489  |                 |                      |            | chr11      | 103349922 | C      | C      | 2137.8        | 0/1               | 0/1               | 0/1              |
| 3781    | E2F1     | compound heterozygous | 72.381458                             | nonsynonymous SNV          | uc002wzu.4.c.G598A.p.G200S      | 0.02                        | rs3385772    | 0               | B                    | -7.32      | chr20      | 32266134  | T      | C      | 332.4         | 0/0               | 0/1               | 0/1              |
| 3781    | E2F1     | compound heterozygous | 72.381458                             | nonsynonymous SNV          | uc002wzu.4.c.G304A.p.A102T      | 4.66E-03                    | rs145741678  | 0.28            | P                    | 3.3        | chr20      | 32268180  | C      | T      | 1411.8        | 0/1               | 0/1               | 0/1              |
| 8522    | EHF1     | compound heterozygous | 47.222222                             | nonsynonymous SNV          | uc002bcb.3.c.T802C.p.F268L      | 1.71E-04                    | rs140051312  | 0.687           | P                    | 4.23       | chr2       | 63091910  | T      | C      | 3630.6        | 0/1               | 0/1               | 0/1              |
| 8522    | EHF1     | compound heterozygous | 47.222222                             | nonsynonymous SNV          | uc002bcb.3.c.C2749G.p.L517V     | 9.84E-04                    | rs150215775  | 0.006           | B                    | 5.57       | chr2       | 63226080  | G      | A      | 3235.6        | 0/1               | 0/1               | 0/1              |
| 2028    | EHMT1    | deNovo                | 3.1316346                             | nonsynonymous SNV          | uc004cbb.1.c.G779A.p.R260Q      | 0.999                       | D            | 5.07            | D                    | 5.07       | chr3       | 140637871 | A      | A      | 1571.7        | 0/0               | 0/1               | 0/1              |
| 313     | E1F5A    | homozygous rare       | 49.386648                             | nonsynonymous SNV          | uc010yfs.1.c.G367A.p.V123I      | 0.02                        | rs78916808   |                 |                      |            | chr17      | 7213352   | G      | A      | 6532.8        | 0/1               | 0/1               | 0/1              |
| 123     | ELOVL5   | compound heterozygous | 59.760557                             | nonsynonymous SNV          | uc003pbs.2.c.G746A.p.C249Y      | 2.28E-04                    | rs146646780  | 0               | B                    | 5.61       | chr6       | 53133954  | C      | T      | 696.1         | 0/1               | 0/1               | 0/1              |
| 123     | ELOVL5   | compound heterozygous | 59.760557                             | stopgain SNV               | uc003pbs.2.c.G736T.p.G246X      | 0.02                        | rs41273878   |                 |                      |            | chr6       | 53133964  | C      | A      | 1043.3        | 0/1               | 0/1               | 0/1              |
| 8522    | ENOSF1   | homozygous rare       | 82.254069                             | nonsynonymous SNV          | uc002kku.4.c.C93A.p.D31E        | 0.01                        | rs34724061   | 0.036           | B                    | 0.557      | chr18      | 706570    | G      | T      | 2893.8        | 0/1               | 0/1               | 1/1              |
| 2023    | EPB41L3  | homozygous rare       | 89.325313                             | nonsynonymous SNV          | uc0101dr.2.c.G230A.p.R77Q       | 4.25E-03                    | rs117538203  | 0.996           | D                    | 5.57       | chr18      | 5419723   | C      | T      | 4532.4        | 0/1               | 0/1               | 1/1              |
| 2028    | EPG5     | compound heterozygous | 28.314461                             | nonsynonymous SNV          | uc002bfn.2.c.G1722C.p.E574D     | 0.02                        | rs16734402   | 0.855           | D                    | 2.22       | chr18      | 43467728  | C      | G      | 2713.8        | 0/1               | 0/1               | 0/1              |
| 2028    | EPG5     | compound heterozygous | 28.314461                             | nonsynonymous SNV          | uc002bfn.3.c.A1766G.p.Q589R     | 0.01                        | rs61734402   | 0.855           | D                    | 4.83       | chr18      | 43522897  | T      | A      | 4263.5        | 0/1               | 0/1               | 0/1              |
| 152     | ERC1     | homozygous rare       | 10.539042                             | nonsynonymous SNV          | uc010qf.2.c.A1486G.p.S50Q       | 0.02                        | rs35037408   | 0               | B                    | -3.85      | chr12      | 1137217   | A      | A      | 1442.1        | 0/1               | 0/1               | 1/1              |
| 66      | ERCC2    | compound heterozygous | 1.8872376                             | nonsynonymous SNV          | uc002pbk.2.c.A470C.p.K157T      | 3.25E-05                    | 0.961        | D               | 3.33                 | chr19      | 45888148   | T         | G      | 1284.7 | 0/1           | 0/1               | 0/1               |                  |
| 66      | ERCC2    | compound heterozygous | 1.8872376                             | nonsynonymous SNV          | uc002pbk.2.c.T52G.p.F18V        | 0.01                        | rs11562095   |                 |                      |            | chr19      | 45885046  | A      | C      | 748.9         | 0/1               | 0/1               | 0/1              |
| 2025    | FAM56C   | homozygous rare       | NA                                    | nonsynonymous SNV          | uc003dvn.3.c.T1269G.p.H423Q     | 0.02                        | rs35589292   | 0.165           | P                    | -2.72      | chr3       | 101543087 | G      | G      | 4893.7        | 0/1               | 0/1               | 1/1              |
| 2023    | FAM58BP  | homozygous rare       | NA                                    | nonframeshift deletion     | uc009wzi.1.c.13_36del.p.5_12del | 0.02                        | rs141962771  |                 |                      |            | chr1       | 200182703 | G      | G      | 5751.1        | 0/1               | 0/1               | 1/1              |
| 2020    | FAM70B   | compound heterozygous | 84.123614                             | nonsynonymous SNV          | uc001vuh.3.c.C347T.p.P116L      | 2.03E-03                    | rs114871504  | 0.918           | D                    | 3.29       | chr13      | 114502316 | C      | C      | 4281.7        | 0/1               | 0/1               | 0/1              |
| 2020    | FAM70B   | compound heterozygous | 84.123614                             | nonsynonymous SNV          | uc001vuh.3.c.G547A.p.V183I      | 0.02                        | rs41284482   | 0.995           | D                    | 4.34       | chr13      | 114504663 | G      | A      | 226.6         | 0/1               | 0/1               | 0/1              |
| 2020    | FBLN2    | compound heterozygous | 6.9868766                             | nonsynonymous SNV          | uc011auz.2.c.G1009A.p.A337T     | 3.12E-03                    | rs113899508  |                 |                      |            | chr3       | 13612786  | G      | A      | 423.3         | 0/1               | 0/1               | 0/1              |
| 2020    | FBLN2    | compound heterozygous | 6.9868766                             | nonsynonymous SNV          | uc011auz.2.c.C221A.p.V712I      | 4.65E-04                    | rs136814144  |                 |                      |            | chr3       | 136814144 | G      | A      | 382.1         | 0/1               | 0/1               | 0/1              |
| 2020    | FBN1     | compound heterozygous | 0.6428403                             | nonsynonymous SNV          | uc001zww.2.c.T766T.p.R2554W     | 1.63E-05                    | rs369294972  | 0.995           | D                    | 4.48       | chr15      | 48713794  | A      | A      | 385.0         | 0/1               | 0/1               | 0/1              |
| 2020    | FBN1     | compound heterozygous | 0.6428403                             | nonsynonymous SNV          | uc001zww.2.c.T986C.p.I329T      | 2.28E-03                    | rs12324002   | 0.003           | B                    | 5.68       | chr15      | 48818329  | A      | G      | 1595.2        | 0/1               | 0/1               | 0/1              |
| 2026    | FBXL18   | homozygous rare       | 12.485256                             | nonsynonymous SNV          | uc0030sn.4.c.T1656G.p.N552K     | 0.01                        | rs33941092   | 0.047           | B                    | 2.46       | chr7       | 5540244   | A      | G      | 1056.9        | 0/1               | 0/1               | 0/1              |
| 135     | FBXL6    | compound heterozygous | 24.534088                             | nonsynonymous SNV          | uc003bzb.3.c.T338C.p.L113P      | 5.96E-03                    | rs72695499   | 0.989           | D                    | 4.21       | chr8       | 145580028 | A      | G      | 727.2         | 0/1               | 0/1               | 0/1              |
| 135     | FBXL6    | compound heterozygous | 24.534088                             | nonsynonymous SNV          | uc010mfx.3.c.C135C.p.L12P       | 0.02                        | rs11762319   | 0.852           | D                    | 4.43       | chr8       | 145580669 | A      | G      | 588.8         | 0/1               | 0/1               | 0/1              |
| 2026    | FBXO38   | compound heterozygous | 10.503657                             | nonsynonymous SNV          | uc003jpf.1.c.T1002A.p.D334E     | 0.99                        | D            | 2.93            | chr5                 | 147790237  | T          | A         | 4208.4 | 0/1    | 0/1           | 0/1               |                   |                  |
| 2026    | FBXO38   | compound heterozygous | 10.503657                             | nonsynonymous SNV          | uc003jpf.1.c.C2341T.p.P781S     | 1.06E-03                    | rs116266000  | 0.001           | B                    | 0.934      | chr5       | 147807198 | C      | T      | 628.7         | 0/1               | 0/1               | 0/1              |
| 2023    | FBXO40   | compound heterozygous | 12.57372                              | nonsynonymous SNV          | uc003seg.2.c.G307A.p.P23K       | 3.42E-04                    | rs12144020   | 0.854           | D                    | 4.96       | chr3       | 12144020  | G      | A      | 2562.7        | 0/1               | 0/1               | 0/1              |
| 2023    | FBXO40   | compound heterozygous | 12.57372                              | nonsynonymous SNV          | uc003seg.2.c.G1540A.p.S14T      | 1.71E-04                    | rs139583536  | 0.88            | D                    | 4.6        | chr3       | 12341816  | A      | G      | 1266.9        | 0/1               | 0/1               | 0/1              |
| 3761    | FCHSD1   | compound heterozygous | 68.536211                             | nonsynonymous SNV          | uc010jgg.3.c.A1031C.p.D344A     | 0.02                        | rs116772194  |                 |                      |            | chr5       | 141021294 | T      | G      | 1584.1        | 0/1               | 0/1               | 0/1              |
| 3761    | FCHSD1   | compound heterozygous | 68.536211                             | nonsynonymous SNV          | uc003llk.3.c.C1032A.p.N344K     | 0.02                        | rs3749760    |                 |                      |            | chr5       | 141026182 | G      | T      | 865.0         | 0/1               | 0/1               | 0/1              |
| 3761    | FCN2     | deNovo                | 82.295353                             | nonsynonymous SNV          | uc004cfh.1.c.G666A.p.M222I      | 0.02                        | rs13779099   | 0.006           | B                    | -3.05      | chr9       | 137779099 | G      | A      | 547.6         | 0/1               | 0/1               | 0/1              |
| 7952    | FGFBP3   | compound heterozygous | NA                                    | nonsynonymous SNV          | uc021pwg.1.c.G676C.p.D226H      | 0.01                        | rs80269321   | 0.871           | D                    | 0.648      | chr10      | 93688051  | C      | C      | 754.4         | 0/1               | 0/1               | 0/1              |
| 7952    | FGFBP3   | compound heterozygous | NA                                    | nonsynonymous SNV          | uc021pwg.1.c.A587G.p.K196R      | 0.01                        | rs11186740   | 0.024           | B                    | 1.25       | chr10      | 93688140  | T      | G      | 1746.1        | 0/1               | 0/1               | 0/1              |
| 1346    | FMN1     | homozygous rare       | 88.635291                             | nonsynonymous SNV          | uc001zmf.4.c.C2048T.p.P683L     | 0.02                        | rs117804335  |                 |                      |            | chr15      | 32611185  | A      | A      | 1691.5        | 0/1               | 0/1               | 1/1              |
| 3737    | FMN1     | deNovo                | 88.635291                             | nonsynonymous SNV          | uc001zmf.4.c.C1439T.p.A380L     | 0.02                        | rs1148251675 |                 |                      |            | chr15      | 33357211  | G      | A      | 2091.7        | 0/1               | 0/1               | 1/1              |
| 45      | FNIP2    | compound heterozygous | 45.647558                             | nonsynonymous SNV          | uc0030iq.3.c.T891C.p.S301I      | 0.02                        | rs19790252   |                 |                      |            | chr4       | 15978941  | G      | A      | 979.2         | 0/1               | 0/1               | 0/1              |
| 120     | FNIP2    | compound heterozygous | 45.647558                             | nonsynonymous SNV          | uc0030iq.4.c.C1653A.p.S551R     | 0.02                        | rs62001914   |                 |                      |            | chr4       | 159789411 | A      | A      | 1073.8        | 0/1               | 0/1               | 0/1              |
| 120     | FNIP2    | compound heterozygous | 45.647558                             | nonsynonymous SNV          | uc0030iq.4.c.G1426T.p.A476S     | 0.01                        | rs62001915   |                 |                      |            | chr4       | 159782889 | G      | A      | 544.3         | 0/1               | 0/1               | 0/1              |
| 120     | FNIP2    | compound heterozygous | 45.647558                             | nonsynonymous SNV          | uc0030iq.4.c.C1653A.p.S551R     | 0.02                        | rs62001914   |                 |                      |            | chr4       | 159789411 | C      | A      | 421.6         | 0/1               | 0/1               | 0/1              |
| 14      | FREM2    | homozygous rare       | 16.772824                             | nonframeshift substitution | uc001uww.3.c.T16_117GC:FREM2    |                             |              |                 |                      |            | chr13      | 39424253  | CT     | GC     | 1177.2        | 0/1               | 0/1               | 0/1              |
| 28      | FSCN2    | compound heterozygous | NA                                    | nonsynonymous SNV          | uc010wuo.2.c.G829T.p.V277F      |                             | rs181420326  |                 |                      |            | chr17      | 79502080  | G      | T      | 497.7         | 0/1               | 0/1               | 0/1              |
| 28      | FSCN2    | compound heterozygous | NA                                    | nonsynonymous SNV          | uc010wuo.2.c.G967A.p.A323T      | 0.01                        | rs18636879   |                 |                      |            | chr17      | 79502218  | G      | A      | 977.1         | 0/1               | 0/1               | 0/1              |
| 2035    | G2E3     | homozygous rare       | 75.294881                             | nonsynonymous SNV          | uc001wql.1.c.G442A.p.A148T      | 5.73E-03                    | rs45475495   | 0.002           | B                    | 3.13       | chr14      | 31085525  | A      | A      | 3273.8        | 0/1               | 0/1               | 1/1              |
| 2033    | G4A      | homozygous rare       | 6.9891964                             | nonsynonymous SNV          | uc002jxp.3.c.G271A.p.D91M       | 0.02                        | rs1800299    | 0.999           | D                    | 4.7        | chr17      | 78078566  | A      | A      | 984.4         | 0/1               | 0/1               | 0/1              |
| 2007    | GAB3     | homozygous rare       | 50.011795                             | nonsynonymous SNV          | uc004fml.1.c.G4186C.p.S139T     | 7.42E-03                    | rs184809317  | 0.123           | B                    | 3.4        | chr1       | 15308497  | G      | A      | 2937.4        | 0/1               | 0/1               | 0/1              |
| 3731    | GAL3ST1  | compound heterozygous | 85.208776                             | nonsynonymous SNV          | uc0030ah.1.c.G119C.p.G40A       | 1.63E-05                    | rs200175330  | 0.016           | B                    | 3.68       | chr22      | 30953261  | C      | G      | 709.1         | 0/1               | 0/1               | 0/1              |
| 3731    | GAL3ST1  | compound heterozygous | 85.208776                             | nonsynonymous SNV          | uc0030ah.1.c.G100A.p.V34M       | 0.02                        | rs55674628   | 0.065           | B                    | 3.67       | chr22      | 30953280  | C      | G      | 878.1         | 0/1               | 0/1               | 0/1              |
| 3731    | GHTM     | homozygous rare       | 45.126858                             | nonsynonymous SNV          | uc010mqb.1.c.C353T.p.P118L      | 5.49E-03                    | rs11550184   | 0.012           | B                    | 4.76       | chr10      | 85908565  | C      | T      | 6801.1        | 0/1               | 0/1               | 1/1              |
| 2027    | GLI3     | homozygous rare       | 52.860344                             | nonsynonymous SNV          | uc003zhy.1.c.C870A.p.D290E      | 0.02                        | rs148199056  | 0               | B                    | 2.56       | chr9       | 4117942   | T      | T      | 2111.4        | 0/1               | 0/1               | 1/1              |
| 2034    | GMPPB    | compound heterozygous | 30.555556                             | nonsynonymous SNV          | uc003cck.1.c.C869T.p.T290M      | 4.07E-05                    | rs139668958  | 0.28            | P                    | 4.52       | chr3       | 49759480  | A      | A      | 568.2         | 0/1               | 0/1               | 0/1              |
| 2034    | GMPPB    | compound heterozygous | 30.555556                             | nonsynonymous SNV          | uc003cck.1.c.C376G.p.H126D      | 0.01                        | rs34345884   | 0.001           | B                    | 4.59       | chr3       | 49760431  | G      | C      | 1313.1        | 0/1               | 0/1               | 0/1              |
| 749     | GOLGB1   | homozygous rare       | 37.768342                             | nonsynonymous SNV          | uc011bjm.1.c.C2200T.p.L734F     | 8.65E-03                    | rs114420009  | 0.45            | P                    | 4.84       | chr4       | 12141613  | A      | A      | 4347.4        | 0/1               | 0/1               | 1/1              |
| 3721    | GPNMB    | compound heterozygous | 89.289927                             | nonsynonymous SNV          | uc001bnc.3.c.A1463G.p.S992D     | 8.13E-06                    | rs19409392   | 0.992           | D                    | 4.68       | chr2       | 2721781   | G      | A      | 1723.1        | 0/1               | 0/1               | 1/1              |
| 54      | GPNMB    | compound heterozygous | 89.289927                             | nonsynonymous SNV          | uc011jyz.2.c.C2347A.p.N98K      | 1.73E-03                    | rs17147995   | 0.926           | D                    | 4.34       | chr7       | 32299648  | G      | G      | 350.3         | 0/1               | 0/1               | 0/1              |
| 54      | GPNMB    | compound heterozygous | 89.289927                             | stopgain SNV               | uc011jyz.2.c.G1366T.p.E456X     | 9.08E-03                    | rs11537976   | 0.403943        | NA                   | 0.185      | chr7       | 23313823  | T      | T      | 3031.4        | 0/1               | 0/1               | 0/1              |
| 28      | GPR111   | homozygous rare       | NA                                    | nonframeshift substitution | uc010jzj.1.c.1278_1279TG:GPR111 |                             |              |                 |                      |            | chr6       | 47649573  | CA     | TG     | 1376.1        | 0/1               | 0/1               | 0/1              |
| 289     | GPR111   | homozygous rare       | NA                                    | nonframeshift substitution | uc010jzj.1.c.1278_1279TG:GPR111 |                             |              |                 |                      |            | chr6       | 47649573  | CA     | TG     | 1548.0        | 0/1               | 0/1               | 0/1              |
| 2020    | GPR123   | compound heterozygous | 43.772116                             | nonsynonymous SNV          | uc001llw.3.c.G592A.p.A198T      | 0.02                        | rs111011757  |                 |                      |            |            |           |        |        |               |                   |                   |                  |

| Proband | Gene      | Inheritance           | Residual Variation Intoleranc | Exonic Function            | Amino Acid Change                                      | Minor Allele Frequency EXAC | dbSNP138    | PolyPhen2 Score | PolyPhen2 Prediction | GERP Score | Chromosome        | Position         | Ref    | Alt | Quality Score | Paternal Genotype | Maternal Genotype | Proband Genotype |
|---------|-----------|-----------------------|-------------------------------|----------------------------|--------------------------------------------------------|-----------------------------|-------------|-----------------|----------------------|------------|-------------------|------------------|--------|-----|---------------|-------------------|-------------------|------------------|
| 4405    | KIAA100   | compound heterozygous | 73.425336                     | nonsynonymous SNV          | uc002bhu.3.c.G2852A.p.R951H                            | 3.80E-03                    | rs61732688  | 0.998           | D                    | 5.55       | chr17             | 26961753         | C      | T   | 1356          | 0/0               | 0/1               | 0/1              |
| 4405    | KIAA100   | compound heterozygous | 73.425336                     | nonsynonymous SNV          | uc010crr.2.c.G321C.p.K107N                             |                             |             | 0.001           | B                    | -4.36      | chr17             | 26968923         | C      | G   | 916.8         | 0/0               | 0/0               | 1/0              |
| 2034    | KIAA0556  | homozygous rare       | 88.133994                     | nonsynonymous SNV          | uc002dow.3.c.G4276A.p.E1426K                           | 0.02                        | rs117316062 | 0.98            | D                    | 4.42       | chr16             | 27784497         | G      | A   | 10634.5       | 0/1               | 0/1               | 0/1              |
| 32      | KIAA0564  | compound heterozygous | 10.509554                     | nonsynonymous SNV          | uc001uyj.3.c.G4690A.p.V1564M                           | 4.57E-03                    | rs73464952  | 0.875           | D                    | 5.73       | chr13             | 42189142         | G      | T   | 1487.6        | 0/1               | 0/1               | 0/1              |
| 32      | KIAA0564  | compound heterozygous | 10.509554                     | nonsynonymous SNV          | uc001uyj.3.c.G2693A.p.R989K                            | 8.67E-03                    | rs41288291  | 0.727           | P                    | 5.25       | chr13             | 42301395         | C      | C   | 1848.6        | 0/1               | 0/0               | 1/0              |
| 3721    | KIAA0564  | compound heterozygous | 10.509554                     | nonsynonymous SNV          | uc001uyj.3.c.A2795G.p.K932R                            | 3.25E-05                    | rs4295675   | 0.349           | P                    | 5.27       | chr13             | 42295675         | T      | C   | 222.6         | 0/1               | 0/0               | 1/0              |
| 3721    | KIAA0564  | compound heterozygous | 10.509554                     | nonsynonymous SNV          | uc001uyj.3.c.T2783C.p.V928A                            | 3.33E-04                    | rs138978193 | 0.305           | P                    | 5.27       | chr13             | 42295687         | A      | G   | 2278.6        | 0/1               | 0/0               | 1/0              |
| 155     | KIAA0664  | compound heterozygous | 1.3328615                     | nonsynonymous SNV          | uc002fux.1.c.G2233A.p.G745S                            | 5.72E-05                    | rs370270067 |                 | C                    | 4.77       | chr17             | 25995688         | C      | T   | 168.4         | 0/0               | 0/1               | 0/1              |
| 146     | KIAA0754  | compound heterozygous | NA                            | nonsynonymous SNV          | uc002fux.1.c.G1567A.p.A523T                            | 6.92E-03                    | rs145919520 |                 | T                    | 260        | chr17             | 2601226          | T      | G   | 461.9         | 0/1               | 0/0               | 1/0              |
| 146     | KIAA0754  | compound heterozygous | NA                            | nonsynonymous SNV          | uc0030wv.1.c.A536C.p.L121F                             | 9.01E-03                    | rs74607331  |                 | C                    | 4.1        | chr1              | 39876573         | A      | C   | 2048.1        | 0/0               | 0/1               | 0/1              |
| 2013    | KIAA0889  | compound heterozygous | NA                            | nonsynonymous SNV          | uc009v1t.1.c.A4082C.p.E1361A                           | 4.09E-03                    | rs78342613  |                 | A                    | 3.8        | chr1              | 39800219         | A      | C   | 414.7         | 0/1               | 0/0               | 1/0              |
| 2013    | KIAA0889  | compound heterozygous | NA                            | nonsynonymous SNV          | uc002ygd.1.c.C1625T.p.P542L                            | 3.82E-03                    | rs145513467 |                 | G                    | 4.1        | chr20             | 35441225         | G      | A   | 1140.1        | 0/1               | 0/0               | 1/0              |
| 2013    | KIAA0889  | compound heterozygous | NA                            | nonsynonymous SNV          | uc002ygd.1.c.C1641T.p.V481L                            | 2.44E-05                    |             |                 | C                    | 3.0        | chr20             | 35443690         | C      | G   | 703.5         | 0/0               | 0/1               | 0/1              |
| 2022    | KIAA1797  | compound heterozygous | NA                            | nonsynonymous SNV          | uc003zoh.1.c.C644T.p.T215I                             | 1.28E-03                    | rs147376982 | 0.254           | P                    | 0.566      | chr9              | 20881888         | C      | T   | 1203.9        | 0/0               | 0/1               | 0/1              |
| 2022    | KIAA1797  | compound heterozygous | NA                            | nonsynonymous SNV          | uc003zoh.1.c.G3355A.p.A119T                            | 7.97E-03                    | rs150147497 |                 | B                    | 4.4        | chr9              | 20990164         | G      | A   | 2268.9        | 0/1               | 0/0               | 1/0              |
| 3721    | KIAA1797  | compound heterozygous | NA                            | nonsynonymous SNV          | uc003zoh.1.c.A122C.p.D41A                              | 8.14E-06                    |             |                 | D                    | 5          | chr9              | 20823008         | A      | C   | 2080.7        | 0/0               | 0/1               | 0/1              |
| 3721    | KIAA1797  | compound heterozygous | NA                            | nonsynonymous SNV          | uc003zoh.1.c.A554T.p.D185V                             |                             |             | 0.008           | B                    | 4.7        | chr9              | 20874735         | A      | T   | 2572.6        | 0/1               | 0/0               | 1/0              |
| 2008    | KIF13A    | compound heterozygous | 46.496815                     | nonsynonymous SNV          | uc003nce.2.c.C516G.p.D172E                             | 6.66E-03                    | rs41267712  |                 | G                    | 3.8        | chr6              | 17764896         | G      | C   | 2247.4        | 0/0               | 0/0               | 1/0              |
| 2008    | KIF13A    | compound heterozygous | 46.496815                     | nonsynonymous SNV          | uc003nce.2.c.A1G.p.M1V                                 | 0.02                        | rs17689215  |                 | T                    | 3.8        | chr6              | 17773790         | T      | C   | 3984.1        | 0/0               | 0/1               | 0/1              |
| 2013    | KIF20A    | compound heterozygous | 12.532437                     | nonsynonymous SNV          | uc003lqj.3.c.C131T.p.S44F                              | 2.86E-03                    | rs150704301 | 0.995           | D                    | 4.05       | chr5              | 137515500        | C      | T   | 1234.7        | 0/1               | 0/0               | 1/0              |
| 2013    | KIF20A    | compound heterozygous | 12.532437                     | nonsynonymous SNV          | uc003lqj.3.c.C2516T.p.P89L                             | 0.01                        | rs3172747   | 0.303           | P                    | 5.48       | chr5              | 137522945        | T      | C   | 4046.7        | 0/0               | 0/1               | 0/1              |
| 45      | KLHL38    | homozygous rare       | 80.372729                     | nonframeshift substitution | KLHL38:uc003yqs.1.exon1.c.293_294GC                    |                             |             |                 | AT                   | GC         | 2252              | 0/1              | 0/1    | 1/1 |               |                   |                   |                  |
| 123     | KLHL38    | homozygous rare       | 80.372729                     | nonframeshift substitution | KLHL38:uc003yqs.1.exon1.c.293_294GC                    |                             |             |                 | AT                   | GC         | 1309.5            | 0/1              | 0/1    | 1/1 |               |                   |                   |                  |
| 2026    | KLK3      | homozygous rare       | 67.359688                     | nonsynonymous SNV          | uc002pts.1.c.G304A.p.D102N                             | 0.02                        | rs61752561  | 0               | B                    | -2.85      | chr19             | 5161382          | G      | A   | 5170.5        | 0/1               | 0/1               | 1/1              |
| 17      | KLK3      | homozygous rare       | 67.359688                     | nonsynonymous SNV          | uc002pts.1.c.G304A.p.D102N                             | 0.02                        | rs61752561  | 0               | B                    | -2.85      | chr19             | 5161382          | G      | A   | 2478.1        | 0/1               | 0/1               | 1/1              |
| 2010    | KRT72     | compound heterozygous | 67.585515                     | nonsynonymous SNV          | uc002hwh.1.c.A170G.p.R106A                             | 2.44E-05                    | rs10789156  | 0.769           | P                    | 5.68       | chr7              | 38941004         | A      | T   | 5094          | 0/0               | 0/1               | 1/0              |
| 2010    | KRT72     | compound heterozygous | 67.585515                     | nonsynonymous SNV          | uc002hwh.1.c.G565C.p.V189L                             | 3.42E-03                    | rs139807956 | 0.01            | B                    | 3.26       | chr17             | 38954162         | C      | G   | 3384.3        | 0/0               | 0/1               | 0/1              |
| 152     | KRT6B     | homozygous rare       | 32.248172                     | nonsynonymous SNV          | uc001sak.3.c.G1495A.p.G499S                            | 0.02                        | rs61746355  | 0.174644        | NA                   | -0.274     | chr12             | 52841174         | C      | T   | 3452.3        | 0/1               | 0/1               | 1/1              |
| 3731    | KRTAP17-1 | homozygous rare       | 67.716443                     | nonsynonymous SNV          | uc002hwj.3.c.G1340A.p.G47D                             | 1.34E-03                    | rs74252500  | 0.414147        | NA                   | -0.3       | chr17             | 39471763         | T      | G   | 735.9         | 0/1               | 0/1               | 1/1              |
| 2007    | KRTAP19-6 | homozygous rare       | 80.455296                     | frameshift substitution    | KRTAP19-6:uc002yok.1.exon1.c.153_171TTATGGATTCTCTGGATT |                             |             |                 | chr21                | 31913982   | GAATCCAGAGAATCCAT | AATCCAGAGAATCCAT | 5664.2 | 0/1 | 0/1           | 1/1               |                   |                  |
| 17      | KRTAP19-6 | homozygous rare       | 80.455296                     | frameshift substitution    | KRTAP19-6:uc002yok.1.exon1.c.153_171TTATGGATTCTCTGGATT |                             |             |                 | chr21                | 31913982   | GAATCCAGAGAATCCAT | AATCCAGAGAATCCAT | 6149.8 | 0/1 | 0/1           | 1/1               |                   |                  |
| 54      | KRTAP19-6 | homozygous rare       | 80.455296                     | frameshift substitution    | KRTAP19-6:uc002yok.1.exon1.c.153_171TTATGGATTCTCTGGATT |                             |             |                 | chr21                | 31913982   | GAATCCAGAGAATCCAT | AATCCAGAGAATCCAT | 5995   | 0/1 | 0/1           | 1/1               |                   |                  |
| 2001    | LAI2      | homozygous rare       | 75.12385                      | stopgain SNV               | uc002zgc.3.c.C226T.p.R76X                              | 0.02                        | rs61737751  | 0.534453        | NA                   | 0.692      | chr19             | 95019261         | T      | T   | 15219.2       | 0/1               | 0/1               | 1/1              |
| 3731    | LAMA1     | homozygous rare       | 66.217268                     | nonsynonymous SNV          | uc010wzj.2.c.C599A.p.L1967M                            | 4.71E-03                    | rs60009220  | 0.001           | B                    | 3.1        | chr16             | 9861680          | G      | T   | 2599.2        | 0/0               | 0/1               | 1/1              |
| 155     | LAMA2     | compound heterozygous | 79.641425                     | nonsynonymous SNV          | uc003qbn.3.c.G222A.p.E308K                             | 1.15E-03                    | rs14662599  | 0.620829        | NA                   | 5.57       | chr6              | 129470136        | A      | A   | 794.2         | 0/1               | 0/0               | 1/0              |
| 155     | LAMA2     | compound heterozygous | 79.641425                     | nonsynonymous SNV          | uc003qbn.3.c.G4750A.p.G1584S                           | 0.02                        | rs11781224  | 0.348762        | NA                   | 3.7        | chr6              | 129687396        | G      | A   | 980.7         | 0/1               | 0/0               | 1/0              |
| 2812    | LAMB1     | compound heterozygous | 8.5456476                     | nonsynonymous SNV          | uc003evz.2.c.G2941A.p.D981N                            | 0.01                        | rs61751041  | 0               | B                    | 2.75       | chr7              | 107594185        | C      | T   | 1171.2        | 0/1               | 0/0               | 1/0              |
| 2812    | LAMB1     | compound heterozygous | 8.5456476                     | nonsynonymous SNV          | uc003evz.2.c.C2455G.p.R819G                            | 0.01                        | rs80095409  | 0.999           | D                    | 4.96       | chr7              | 107600211        | G      | C   | 382.3         | 0/0               | 0/1               | 0/1              |
| 53      | LARS      | homozygous rare       | 24.675631                     | nonframeshift substitution | uc003nwh.1.c.147_148GG:LARS                            |                             |             |                 | chr5                 | 145508636  | TA                | CC               | 1338.3 | 0/1 | 0/1           | 0/1               | 1/1               |                  |
| 146     | LEPRE1    | compound heterozygous | 74.681529                     | nonsynonymous SNV          | uc001hxx.4.c.G2248A.p.G750R                            | 5.05E-03                    | rs116577636 | 0.276323        | NA                   | -1.8       | chr12             | 43212750         | C      | T   | 126.5         | 0/1               | 0/1               | 0/1              |
| 246     | LEPRE1    | compound heterozygous | 74.681529                     | nonsynonymous SNV          | uc001hxx.4.c.G2248A.p.G750R                            |                             |             |                 | chr12                | 43212750   | C                 | T                | 351.7  | 0/1 | 0/0           | 1/0               |                   |                  |
| 18      | LMT1      | homozygous rare       | 81.086341                     | nonsynonymous SNV          | uc003gdv.3.c.G1496A.p.R496H                            | 0.02                        | rs28681468  | 0.005           | B                    | -1.51      | chr4              | 1824020          | C      | T   | 91.9          | 0/1               | 0/1               | 1/1              |
| 123     | LMT2      | homozygous rare       | 63.851144                     | nonframeshift substitution | uc003nwh.1.c.139_140GC:LMT2                            |                             |             |                 | chr9                 | 1398199    | 336               | 163              | 15     | 216 | 15            | 0/1               | 0/1               | 1/1              |
| 2033    | LMTK2     | compound heterozygous | 1.0497759                     | nonsynonymous SNV          | uc003upd.2.c.G2584A.p.A862T                            | 3.74E-03                    | rs34005293  | 0               | B                    | -6.27      | chr7              | 97822361         | G      | A   | 1495.8        | 0/0               | 0/1               | 1/0              |
| 2033    | LMTK2     | compound heterozygous | 1.0497759                     | nonsynonymous SNV          | uc003upd.2.c.C4022G.p.A1341G                           | 5.07E-03                    | rs56343792  | 0               | B                    | 1.01       | chr7              | 97823799         | C      | G   | 845.7         | 0/0               | 0/1               | 0/1              |
| 7760    | LOC285033 | homozygous rare       | NA                            | nonsynonymous SNV          | uc002yup.1.c.G298C.p.V100L                             | 1.17E-03                    | rs116858801 |                 | chr2                 | 9690359    | G                 | C                | 1278   | 0/1 | 0/1           | 1/1               |                   |                  |
| 2027    | LOC286238 | homozygous rare       | NA                            | nonframeshift substitution | LOC286238:uc010mq1.1.exon2.c.149_150AG                 |                             |             |                 | chr9                 | 91262493   | AG                | CT               | 5610.8 | 0/1 | 0/1           | 1/1               |                   |                  |
| 66      | LOC646508 | homozygous rare       | NA                            | nonsynonymous SNV          | uc0021uz.1.c.G341A.p.S114N                             | 0.01                        | rs201240639 |                 | chr19                | 53786079   | G                 | A                | 2457.4 | 0/1 | 0/1           | 1/1               |                   |                  |
| 66      | LOC646508 | homozygous rare       | NA                            | nonframeshift substitution | LOC646508:uc021uze.1.exon3.c.343_344AG                 |                             |             |                 | chr19                | 53786081   | GA                | AG               | 2457.4 | 0/1 | 0/1           | 1/1               |                   |                  |
| 146     | LOC646508 | homozygous rare       | NA                            | nonsynonymous SNV          | uc0021uze.1.c.G341A.p.S114N                            | 0.01                        | rs201240639 |                 | chr19                | 53786079   | G                 | A                | 1522.9 | 0/1 | 0/1           | 1/1               |                   |                  |
| 146     | LOC646508 | homozygous rare       | NA                            | nonframeshift substitution | LOC646508:uc021uze.1.exon3.c.343_344AG                 |                             |             |                 | chr19                | 53786081   | GA                | AG               | 1522.9 | 0/1 | 0/1           | 1/1               |                   |                  |
| 45      | LRRRC16B  | compound heterozygous | 16.153574                     | nonsynonymous SNV          | uc001wjk.2.c.G287A.p.R98H                              | 0.02                        | rs117092113 | 0.515007        | NA                   | 4.81       | chr1              | 24533474         | A      | A   | 580.9         | 0/1               | 0/0               | 1/0              |
| 45      | LRRRC16B  | compound heterozygous | 16.153574                     | nonsynonymous SNV          | uc001wjk.2.c.G391A.p.V131M                             | 7.34E-05                    | rs10304735  | 0.304735        | NA                   | -5.33      | chr14             | 24534189         | G      | A   | 2317.5        | 0/0               | 0/1               | 0/1              |
| 50      | LRRRC3C   | homozygous rare       | NA                            | nonsynonymous SNV          | uc021hw1.1.c.C514G.p.L172V                             | 0.02                        | rs72832968  |                 | C                    | 3.8        | chr17             | 38100673         | C      | G   | 2685.8        | 0/1               | 0/1               | 1/1              |
| 17      | LRRK1     | compound heterozygous | 2.9723992                     | nonsynonymous SNV          | uc002bwr.3.c.C1246A.p.L416M                            | 8.54E-03                    | rs55739947  | 0.724424        | NA                   | 1.16       | chr15             | 101551007        | C      | A   | 316.4         | 0/1               | 0/0               | 1/0              |
| 17      | LRRK1     | compound heterozygous | 2.9723992                     | nonframeshift substitution | LRRK1:uc002bwr.3.exon33.c.S813_5814AA                  |                             |             |                 | chr15                | 101606889  | GC                | AA               | 379.1  | 0/1 | 0/0           | 1/1               |                   |                  |
| 69      | LRRK1     | homozygous rare       | 2.9723992                     | nonframeshift substitution | LRRK1:uc002bwr.3.exon33.c.S813_5814AA                  |                             |             |                 | chr15                | 101606889  | GC                | AA               | 2232   | 0/1 | 0/1           | 1/1               |                   |                  |
| 3781    | LRRK1     | homozygous rare       | 2.9723992                     | nonframeshift substitution | LRRK1:uc002bwr.3.exon33.c.S813_5814AA                  |                             |             |                 | chr15                | 101606889  | GC                | AA               | 5947.2 | 0/1 | 0/1           | 1/1               |                   |                  |
| 151     | LSG1      | homozygous rare       | 77.311866                     | nonframeshift substitution | LSG1:uc0                                               |                             |             |                 |                      |            |                   |                  |        |     |               |                   |                   |                  |

| Proband | Gene    | Inheritance           | Residual Variation Intoleranc | Exonic Function            | Amino Acid Change                      | Minor Allele Frequency EXAC | dbSNP138    | PolyPhen2 Score | PolyPhen2 Prediction | GERP Score | Chromosome | Position  | Ref      | Alt | Quality Score | Paternal Genotype | Maternal Genotype | Proband Genotype |     |
|---------|---------|-----------------------|-------------------------------|----------------------------|----------------------------------------|-----------------------------|-------------|-----------------|----------------------|------------|------------|-----------|----------|-----|---------------|-------------------|-------------------|------------------|-----|
| 2037    | MYO6    | compound heterozygous | 10.92525                      | nonsynonymous SNV          | uc010eak.3:c.16155C>P.V2052A           | 0.02                        | rs117297085 |                 |                      |            | chr19      | 17322800  | T        | C   | 476.4         | 0/0               | 0/1               | 0/1              |     |
| 3731    | MYO9T   | compound heterozygous | 32.05948                      | nonsynonymous SNV          | uc003blb.3:c.A1496G>Q50R               | 7.73E-03                    | rs34711730  | 0.578           | P                    | 5.67       | chr7       | 157206489 | A        | G   | 1654.2        | 0/1               | 0/1               | 0/1              |     |
| 146     | NALCN   | compound heterozygous | 2.9841944                     | nonsynonymous SNV          | uc001vox.1:c.C2305T>H769Y              | 0.02                        | rs76776920  | 0.984           | D                    | 5.09       | chr13      | 101763029 | G        | A   | 1525.9        | 0/1               | 0/1               | 0/1              |     |
| 1131    | NAPA    | compound heterozygous | 51.65723                      | nonsynonymous SNV          | uc002pha.2:c.G25A>P.E89K               | 9.43E-04                    | rs141536777 | 0.98            | D                    | 5.99       | chr19      | 48018173  | C        | T   | 1077.4        | 0/1               | 0/0               | 1/0              |     |
| 1131    | NAPA    | compound heterozygous | 51.65723                      | nonsynonymous SNV          | uc010eaf.2:c.C134T>P.S45F              |                             |             |                 |                      |            | chr19      | 47996327  | G        | A   | 1984.9        | 0/0               | 0/1               | 0/1              |     |
| 2812    | NCAPD2  | compound heterozygous | 48.950224                     | nonsynonymous SNV          | uc001qoo.2:c.G67T>P.V23L               | 0.02                        | rs61753197  | 0.16            | P                    | 4.29       | chr12      | 6604331   | G        | T   | 4827.2        | 0/1               | 0/1               | 1/1              |     |
| 50      | NCOR1   | compound heterozygous | 1.4979948                     | frameshift deletion        | NCOR1:uc010c0y.3:A942C>P.L314F         | 8.90E-03                    | rs16753150  | 0.834           | P                    | 0.65       | chr17      | 15973774  | T        | C   | 575.9         | 0/1               | 0/0               | 1/0              |     |
| 50      | NCOR1   | compound heterozygous | 1.4979948                     | frameshift deletion        | NCOR1:uc010c0y.3:WholeGene.            | 0.02                        | rs147795041 |                 |                      |            | chr7       | 15953843  | CAT      | G   | 835.4         | 0/0               | 0/1               | 0/1              |     |
| 7952    | NDE1    | compound heterozygous | 11.765747                     | nonsynonymous SNV          | uc002ddu.1:c.C393T>P.L29I              | 8.73E-03                    | rs113493697 | 0.042           | B                    | 5.07       | chr16      | 157850949 | C        | G   | 319.1         | 0/1               | 0/0               | 1/0              |     |
| 7952    | NDE1    | compound heterozygous | 11.765747                     | nonsynonymous SNV          | uc002ddu.1:c.G556T>P.A165S             | 4.07E-05                    | rs147233260 | 0.855           | D                    | 4.75       | chr16      | 157851663 | T        | C   | 1350.2        | 0/0               | 0/1               | 0/1              |     |
| 3731    | NDUFA7  | compound heterozygous | 81.888417                     | nonsynonymous SNV          | uc002mjm.2:c.A158G>P.Y53C              | 1.63E-05                    | rs0992      | 0.999           | D                    | 5.39       | chr19      | 8381473   | T        | C   | 1087.5        | 0/0               | 0/1               | 0/1              |     |
| 3731    | NDUFA7  | compound heterozygous | 81.888417                     | nonsynonymous SNV          | uc002mjm.2:c.A152G>P.N51S              | 5.47E-04                    | rs146105751 | 0               | B                    | 3.31       | chr19      | 8381479   | T        | C   | 1087.5        | 0/1               | 0/0               | 1/0              |     |
| 2035    | NDUFA7  | compound heterozygous | 82.165605                     | nonsynonymous SNV          | uc0012mx.3:c.G526A>P.E176K             | 0.02                        | rs35227875  | 0.088           | B                    | 3.34       | chr15      | 41688732  | C        | T   | 1082.1        | 0/1               | 0/0               | 1/0              |     |
| 2035    | NDUFA7  | compound heterozygous | 82.165605                     | nonsynonymous SNV          | uc0012mx.3:c.T249A>P.D83E              | 3.17E-04                    | rs146540015 | 0.1             | B                    | -1.31      | chr15      | 41689009  | A        | T   | 1537.1        | 0/0               | 0/0               | 1/0              |     |
| 17      | NDUFS7  | compound heterozygous | 39.95046                      | nonsynonymous SNV          | uc002lse.4:c.C613G>P.R205G             | 2.49E-05                    | rs14680508  | 0.387           | P                    | 2.19       | chr19      | 1395458   | C        | G   | 535.5         | 0/1               | 0/0               | 1/0              |     |
| 17      | NDUFS7  | compound heterozygous | 39.95046                      | nonsynonymous SNV          | uc002lsg.2:c.C77T>P.A26V               | 1.51E-04                    | rs1388765   |                 |                      |            | chr19      | 1388765   | C        | C   | 184.1         | 0/0               | 0/1               | 0/1              |     |
| 3731    | NEK10   | compound heterozygous | 89.189667                     | nonsynonymous SNV          | uc003cfd.2:c.A1202G>P.N401S            | 8.89E-03                    | rs150013785 | 0.001           | B                    | 2.41       | chr14      | 75533765  | T        | C   | 2392.5        | 0/1               | 0/1               | 0/1              |     |
| 2001    | NEK9    | compound heterozygous | 25.825666                     | nonsynonymous SNV          | uc001wjl.3:c.A430C>P.T144A             | 1.87E-04                    | rs112467144 | 0.549           | P                    | 4.12       | chr14      | 75558163  | G        | A   | 1240.2        | 0/1               | 0/0               | 1/0              |     |
| 2001    | NEK9    | compound heterozygous | 25.825666                     | nonsynonymous SNV          | uc001wjl.3:c.C752T>P.P251L             | 0.01                        | rs112467144 | 0.549           | P                    | 4.12       | chr14      | 75558163  | G        | A   | 1240.2        | 0/1               | 0/0               | 1/0              |     |
| 151     | NIAP2   | compound heterozygous | 51.916726                     | frameshift deletion        | uc001yva.3:c.1025_1400del>p.342_342del |                             | rs368460716 |                 |                      |            | chr15      | 23006218  | TTCTT    | C   | T             | 1174.5            | 0/1               | 0/1              | 0/1 |
| 2027    | NLRP7   | compound heterozygous | 73.11866                      | nonsynonymous SNV          | uc002oig.4:c.A1532G>P.K511R            | 0.01                        | rs61743949  | 0.071           | B                    | -4.69      | chr19      | 55450655  | T        | C   | 1443.1        | 0/1               | 0/0               | 1/0              |     |
| 2027    | NLRP7   | compound heterozygous | 73.11866                      | nonsynonymous SNV          | uc002oig.4:c.A574C>P.M192L             | 1.09E-03                    | rs104895529 | 0.938           | D                    | -0.67      | chr19      | 55451613  | T        | G   | 1847.9        | 0/1               | 0/0               | 1/0              |     |
| 2033    | NOTCH1  | compound heterozygous | 0.3302666                     | nonsynonymous SNV          | uc004chz.3:c.G6853A>P.V2285I           | 0.02                        | rs61751489  | 0               | B                    | 1.38       | chr9       | 139391338 | C        | C   | 621.8         | 0/1               | 0/0               | 1/0              |     |
| 2033    | NOTCH1  | compound heterozygous | 0.3302666                     | nonsynonymous SNV          | uc004cia.1:c.G1526A>P.R509H            | 0.01                        | rs61751543  | 0.874           | D                    | 3.49       | chr9       | 139401233 | C        | C   | 541.2         | 0/1               | 0/0               | 1/0              |     |
| 155     | NOTCH2  | compound heterozygous | 2.1467327                     | nonsynonymous SNV          | uc0016ek.3:c.T723A>P.L240H             | 1.77E-03                    | rs35586704  | 0.688           | P                    | 5          | chr1       | 120458122 | A        | T   | 1173.5        | 0/0               | 0/1               | 0/1              |     |
| 155     | NOTCH2  | compound heterozygous | 2.1467327                     | nonsynonymous SNV          | uc0016ek.3:c.C398G>P.L067              | 8.13E-06                    | rs61752454  | 0.067           | B                    | 5.47       | chr1       | 120458122 | A        | T   | 1695.2        | 0/1               | 0/1               | 0/1              |     |
| 749     | NPHP4   | compound heterozygous | 83.581033                     | nonsynonymous SNV          | uc0010nv.2:c.G367A>P.L238H             | 3.90E-03                    | rs79119325  | 0.98            | D                    | 5.63       | chr11      | 108032614 | T        | C   | 1504.5        | 0/1               | 0/1               | 1/1              |     |
| 2026    | NPHP4   | compound heterozygous | 81.788158                     | nonsynonymous SNV          | uc001a1q.2:c.C2542T>P.R848H            | 0.01                        | rs17472401  |                 |                      |            | chr1       | 5940243   | G        | A   | 2536.9        | 0/1               | 0/0               | 1/0              |     |
| 2026    | NPHP4   | compound heterozygous | 81.788158                     | nonsynonymous SNV          | uc001a1q.2:c.G1852A>P.E618K            | 0.01                        | rs571655    |                 |                      |            | chr1       | 5965455   | C        | T   | 1266.6        | 0/1               | 0/0               | 1/0              |     |
| 152     | NPHP4   | compound heterozygous | 81.788158                     | nonsynonymous SNV          | uc001a1q.2:c.G2219A>P.R740H            | 0.02                        | rs34248917  |                 |                      |            | chr1       | 5951013   | C        | T   | 185.7         | 0/0               | 0/1               | 0/1              |     |
| 152     | NPHP4   | compound heterozygous | 81.788158                     | nonsynonymous SNV          | uc001a1q.2:c.G1852A>P.E618K            | 0.01                        | rs571655    |                 |                      |            | chr1       | 5965455   | C        | T   | 610           | 0/1               | 0/0               | 1/0              |     |
| 14      | NPVF    | compound heterozygous | 72.009908                     | frameshift substitution    | NPVF:uc003oxo.3:exon3:c.547_553AG      |                             | rs7         | 25264779        |                      |            | chr7       | 25264779  | TTGAATAG | CT  | CT            | 1189.5            | 0/1               | 0/0              | 1/0 |
| 14      | NPVF    | compound heterozygous | 72.009908                     | nonsynonymous SNV          | uc003oxo.3:c.C168G>P.S56R              | 7.32E-04                    | rs147644964 | 0.991           | D                    | 2.23       | chr7       | 25266616  | G        | C   | 258.9         | 0/0               | 0/1               | 0/1              |     |
| 2035    | NPFD2   | compound heterozygous | 50.56853                      | nonsynonymous SNV          | uc003oxo.2:c.C523T>P.R179I             | 1                           | rs147644964 | 0.991           | D                    | 2.23       | chr7       | 25266616  | G        | C   | 258.9         | 0/0               | 0/1               | 0/1              |     |
| 155     | NSD1    | compound heterozygous | 3.2377919                     | nonsynonymous SNV          | uc003mfs.1:c.G279T>C.A833P             | 0.02                        | rs28932179  | 0.004           | B                    | -8.89      | chr3       | 24303473  | G        | C   | 1555.7        | 0/0               | 0/1               | 0/1              |     |
| 155     | NSD1    | compound heterozygous | 3.2377919                     | nonsynonymous SNV          | uc021vlp.1:c.A1083T>P.R361S            | 1.63E-05                    | rs377546578 | 0.405           | P                    | 3.13       | chr5       | 176721980 | A        | T   | 236.6         | 0/1               | 0/0               | 1/0              |     |
| 2036    | NTRK1   | compound heterozygous | 48.908841                     | nonsynonymous SNV          | uc001fgh.1:c.G482A>P.R161H             | 3.01E-04                    | rs150271893 | 0.869           | D                    | -0.246     | chr1       | 156837949 | G        | A   | 1766.5        | 0/1               | 0/0               | 1/0              |     |
| 2036    | NTRK1   | compound heterozygous | 48.908841                     | nonsynonymous SNV          | uc001fgh.1:c.G1456A>P.E486K            | 5.20E-04                    | rs144901788 | 0.98            | D                    | -4.29      | chr1       | 156845431 | G        | A   | 2537.5        | 0/1               | 0/0               | 1/0              |     |
| 2002    | NUP210  | compound heterozygous | 1.7162067                     | nonsynonymous SNV          | uc003bxv.1:c.G3655A>P.V1219I           | 3.25E-05                    | rs201994997 | 0               | B                    | 0.887      | chr3       | 13378316  | C        | T   | 5511.9        | 0/1               | 0/0               | 1/0              |     |
| 2002    | NUP210  | compound heterozygous | 1.7162067                     | nonsynonymous SNV          | uc003bxv.1:c.G3154A>P.G1052S           | 2.74E-03                    | rs151008831 | 0.98            | D                    | 4.3        | chr3       | 13383322  | C        | T   | 1000.2        | 0/1               | 0/0               | 1/0              |     |
| 28      | ORC1    | compound heterozygous | 82.932295                     | nonsynonymous SNV          | uc001ctt.3:c.C1115T>P.A372V            | 0.01                        | rs3087476   | 0.004           | B                    | 2.94       | chr1       | 52854961  | A        | G   | 1283.7        | 0/1               | 0/0               | 1/0              |     |
| 28      | ORC1    | compound heterozygous | 82.932295                     | nonsynonymous SNV          | uc001ctt.3:c.G573C>P.R195H             | 4.15E-03                    | rs3087476   | 0.656           | P                    | 3.2        | chr1       | 52867839  | C        | G   | 1684.2        | 0/1               | 0/0               | 1/0              |     |
| 2001    | OSBP1_A | compound heterozygous | NA                            | nonsynonymous SNV          | uc002kvs.3:c.C825G>P.E218E             | 8.13E-06                    | rs34907319  | 0.001           | B                    | -4.2       | chr18      | 21742348  | G        | A   | 1224.8        | 0/1               | 0/0               | 1/0              |     |
| 2001    | OSBP1_A | compound heterozygous | NA                            | nonsynonymous SNV          | uc002kvs.3:c.T495A>P.N165K             | 4.03E-03                    | rs34907319  | 0.001           | B                    | 1.98       | chr18      | 21913036  | A        | T   | 8862.2        | 0/1               | 0/0               | 1/0              |     |
| 2034    | OSBP1_5 | compound heterozygous | 20.960132                     | nonsynonymous SNV          | uc001lqj.2:c.G401A>P.R134Q             | 0.02                        | rs35733103  | 0.725           | P                    | -0.354     | chr11      | 3114190   | C        | T   | 1085.8        | 0/1               | 0/1               | 0/1              |     |
| 2034    | OSBP1_5 | compound heterozygous | 20.960132                     | nonsynonymous SNV          | uc009ydx.3:c.C55T>P.P19S               | 4.48E-05                    | rs377237273 |                 |                      |            | chr11      | 3150396   | A        | C   | 1347.1        | 0/1               | 0/0               | 1/0              |     |
| 2033    | OTOF    | compound heterozygous | 45.576787                     | nonsynonymous SNV          | uc002zhi.3:c.T1681G>P.C561G            | 0.02                        | rs41288773  | 0.001           | B                    | -1.8       | chr2       | 26695500  | A        | C   | 765.4         | 0/1               | 0/0               | 1/0              |     |
| 2033    | OTOF    | compound heterozygous | 45.576787                     | nonsynonymous SNV          | uc002zhi.3:c.G311A>P.R104H             | 8.97E-04                    | rs80356592  | 0.939           | D                    | 4.09       | chr2       | 26700309  | C        | T   | 1310.9        | 0/1               | 0/0               | 1/0              |     |
| 45      | OTOF    | compound heterozygous | 45.576787                     | nonsynonymous SNV          | uc002zhi.3:c.G1723A>P.V57M             | 0.01                        | rs55676840  | 0.07            | B                    | 3.78       | chr2       | 26703734  | C        | T   | 1384.1        | 0/1               | 0/0               | 1/1              |     |
| 151     | PBRX5   | compound heterozygous | 83.474876                     | frameshift deletion        | uc002zhi.3:c.329del>C.T110fs           |                             | rs329949    |                 |                      |            | chr17      | 3594280   | GG       | G   | 884.6         | 0/1               | 0/1               | 1/1              |     |
| 17      | PALLD   | compound heterozygous | 63.670677                     | nonsynonymous SNV          | uc0030ru.3:c.A625C>P.N299H             | 1.56E-03                    | rs146018183 | 0.374           | P                    | 5.2        | chr4       | 169433260 | A        | C   | 773.8         | 0/0               | 0/1               | 1/0              |     |
| 17      | PALLD   | compound heterozygous | 63.670677                     | nonsynonymous SNV          | uc0030ru.3:c.G784A>P.R255H             |                             | rs146018183 | 0.374           | P                    | 0.176      | chr4       | 169433419 | G        | A   | 289           | 0/0               | 0/1               | 0/1              |     |
| 24      | PALLD   | compound heterozygous | 63.670677                     | nonframeshift substitution | uc0030ru.3:c.671_672CA>PALLD           |                             | rs146018183 | 0.374           | P                    | 0.176      | chr4       | 169433326 | TG       | CA  | 1921.4        | 0/1               | 0/1               | 1/1              |     |
| 3737    | PCDH18  | compound heterozygous | 5.3078556                     | nonsynonymous SNV          | uc0030he.4:c.G3154A>P.G1052R           | 0.99                        | D           | 4.3             | chr4                 | 138442437  | C          | T         | 937.6    | 0/1 | 0/0           | 1/1               |                   |                  |     |
| 3737    | PCDH18  | compound heterozygous | 5.3078556                     | nonsynonymous SNV          | uc0030he.4:c.T2807C>P.L936R            | 0.956                       | D           | 4.06            | chr4                 | 138442784  | A          | G         | 1391.7   | 0/1 | 0/0           | 1/0               |                   |                  |     |
| 151     | PCDH8   | compound heterozygous | 87.715263                     | nonframeshift substitution | PCDH8:uc0030ip.1:exon1:c.763_764TT     |                             | rs146018183 | 0.374           | P                    | 0.176      | chr4       | 140502343 | CC       | TT  | 2331.9        | 0/1               | 0/1               | 1/1              |     |
| 3731    | PCDHGA1 | compound heterozygous | 62.190375                     | nonsynonymous SNV          | uc0030jj.2:c.C2335T>P.L79F             | 0.01                        | rs11575968  | 0.556785        | NA                   | 2.59       | chr5       | 140712586 | C        | C   | 3919.3        | 0/1               | 0/1               | 1/1              |     |

| Proband | Gene     | Inheritance           | Residual Variation Intoleranc | Exonic Function            | Amino Acid Change                          | Minor Allele Frequency | dbSNP138    | PolyPhen2 Score | PolyPhen2 Prediction | GERP Score | Chromosome | Position   | Ref   | Alt      | Quality Score | Paternal Genotype | Maternal Genotype | Proband Genotype |     |
|---------|----------|-----------------------|-------------------------------|----------------------------|--------------------------------------------|------------------------|-------------|-----------------|----------------------|------------|------------|------------|-------|----------|---------------|-------------------|-------------------|------------------|-----|
| 151     | PTPRC    | compound heterozygous | 68.51597                      | nonsynonymous SNV          | uc009wze.1.c.G169C.p.D57H                  | 0.01                   | rs11269905  | 0.992           | D                    | 2.71       | chr1       | 19868761   | G     | C        | 1741          | 0/0               | 0/1               | 0/1              |     |
| 151     | PTPRC    | compound heterozygous | 68.51597                      | nonsynonymous SNV          | uc009wze.1.c.G169C.p.D57H                  | 0.01                   | rs116161234 |                 |                      |            | chr1       | 198661414  | T     | C        | 434.7         | 0/1               | 0/1               | 0/1              |     |
| 8522    | PTPRG    | compound heterozygous | 2.4298184                     | nonsynonymous SNV          | uc003dlb.3.c.G623T.p.P208L                 | 1.63E-04               | rs61757808  | 0.07            | B                    | 4.47       | chr3       | 62118283   | C     | T        | 3852.9        | 0/1               | 0/1               | 0/1              |     |
| 8522    | PTPRG    | compound heterozygous | 2.4298184                     | nonsynonymous SNV          | uc003dlb.3.c.A644G.p.D215G                 | 7.32E-05               | rs140916981 | 0.984           | D                    | 5.45       | chr3       | 62118304   | A     | G        | 4102.6        | 0/1               | 0/1               | 0/1              |     |
| 3731    | PTPRJ    | compound heterozygous | 86.417787                     | nonsynonymous SNV          | uc001nng.4.c.G1114A.p.V372I                | 8.80E-03               | rs2229703   | 0.014           | B                    | -10.8      | chr11      | 48149352   | G     | A        | 632.1         | 0/1               | 0/1               | 0/1              |     |
| 3731    | PTPRJ    | compound heterozygous | 86.417787                     | nonsynonymous SNV          | uc010hr.1.c.G517A.p.E173K                  | 4.07E-04               | rs181029182 | 0.881           | D                    | 0.0462     | chr11      | 48161067   | G     | A        | 1410          | 0/1               | 0/1               | 0/1              |     |
| 3721    | PTPRN    | compound heterozygous | 89.195565                     | nonsynonymous SNV          | uc003wmp.3.c.T1112A.p.L371H                | 1.31E-03               | rs7456452   | 0.03            | B                    | -7.81      | chr7       | 157929357  | A     | T        | 1490.3        | 0/1               | 0/1               | 0/1              |     |
| 3721    | PTPRN    | compound heterozygous | 89.195565                     | nonsynonymous SNV          | uc003wmp.3.c.G1099A.p.D367N                | 9.56E-03               | rs5645575   | 0.023           | B                    | 0.387      | chr7       | 157929370  | T     | T        | 1122.3        | 0/1               | 0/1               | 0/1              |     |
| 114     | PTPRU    | deNovo                | 2.2823779                     | nonsynonymous SNV          | uc001brw.3.c.C2722T.p.R69W                 | 0.02                   | rs29613149  |                 |                      | 2.49       | chr7       | 29613149   | C     | T        | 147.7         | 0/1               | 0/1               | 0/1              |     |
| 3731    | PTPRZ1   | homozygous rare       | 1.350544                      | nonframeshift substitution | PTPRZ1:uc003v9r.3.exon2.c.4290_4298CGAGAGA | 4.07E-05               | rs150833997 | 1               | D                    | 2.49       | chr7       | 121663390  | G     | A        | 2434.2        | 0/1               | 0/1               | 0/1              |     |
| 749     | RAG2     | homozygous rare       | 55.608634                     | nonsynonymous SNV          | uc021qpe.1.c.G229A.p.V8I                   | 3.13E-03               | rs150762709 | 0.024           | B                    | 4.48       | chr11      | 36615697   | G     | A        | 2265.6        | 0/1               | 0/1               | 0/1              |     |
| 146     | RALGDS   | homozygous rare       | 4.6414249                     | nonsynonymous SNV          | uc004cvc.1.c.C2017T.p.P673S                | 0.02                   | rs641999    |                 |                      |            | chr9       | 135976826  | G     | A        | 3732.9        | 0/1               | 0/1               | 0/1              |     |
| 2035    | RBM10    | homozygous rare       | 15.764331                     | nonsynonymous SNV          | uc004dgg.3.c.G1657C.p.A563P                | 0.02                   | rs79693964  | 0.121           | B                    | 4.3        | chrX       | 47041666   | G     | C        | 1681.9        | 0/1               | 0/1               | 0/1              |     |
| 7952    | RCBTB1   | compound heterozygous | 18.783911                     | nonsynonymous SNV          | uc001vde.1.c.A421G.p.M141V                 | 2.03E-04               | rs147650879 | 0.048           | B                    | 3.72       | chr13      | 50134077   | T     | C        | 1368.7        | 0/1               | 0/1               | 0/1              |     |
| 7952    | RCBTB1   | compound heterozygous | 18.783911                     | nonsynonymous SNV          | uc001vde.1.c.A207C.p.E69D                  | 5.40E-03               | rs138303890 | 0.004           | B                    | 4.49       | chr13      | 50140824   | T     | C        | 3767.4        | 0/1               | 0/1               | 0/1              |     |
| 3721    | RECOL    | compound heterozygous | 8.8995046                     | nonsynonymous SNV          | uc001rey.3.c.G1483C.p.D495H                | 3.88E-03               | rs6499      | 0.003           | B                    | 5.09       | chr12      | 21624546   | C     | C        | 1381.8        | 0/1               | 0/1               | 0/1              |     |
| 3721    | RECOL    | compound heterozygous | 8.8995046                     | nonsynonymous SNV          | uc001rey.3.c.G138I.p.R454H                 | 1.63E-05               |             |                 |                      | 1          | D          | 4.75       | chr12 | 21626571 | C             | T                 | 1970              | 0/1              | 0/1 |
| 2001    | RELN     | compound heterozygous | 1.4626091                     | nonsynonymous SNV          | uc0101z.3.c.A1886C.p.S630R                 | 0.02                   | rs115734214 | 0.949           | D                    | 5.27       | chr7       | 103292112  | G     | G        | 1998.2        | 0/1               | 0/1               | 0/1              |     |
| 2001    | RELN     | compound heterozygous | 1.4626091                     | nonsynonymous SNV          | uc0101z.3.c.C1799T.p.S60F                  | 0.01                   | rs78008536  | 0.975           | D                    | 5.45       | chr7       | 103292201  | G     | A        | 2944.8        | 0/1               | 0/1               | 0/1              |     |
| 2037    | RHBG     | homozygous rare       | NA                            | nonsynonymous SNV          | uc010hph.2.c.C243G.p.F81L                  | 0.01                   | rs150963900 |                 |                      |            | chr1       | 15634717   | C     | G        | 4179.3        | 0/1               | 0/1               | 0/1              |     |
| 23      | RHBG     | homozygous rare       | NA                            | frameshift deletion        | uc009wrz.3.c.1169delC.p.S390fs             |                        | rs11303415  |                 |                      |            | chr1       | 15635437   | T     | T        | 1516          | 0/1               | 0/1               | 0/1              |     |
| 50      | RTKN2    | homozygous rare       | 48.779193                     | nonframeshift deletion     | uc009xpf.1.c.321_326del.p.107_109del       |                        | rs59044276  |                 |                      |            | chr10      | 63976913   | A     | A        | 6522.1        | 0/1               | 0/1               | 0/1              |     |
| 114     | RTKN2    | homozygous rare       | 48.779193                     | nonframeshift deletion     | uc009xpf.1.c.321_326del.p.107_109del       |                        | rs59044276  |                 |                      |            | chr10      | 63976913   | A     | A        | 2430.8        | 0/1               | 0/1               | 0/1              |     |
| 1131    | RTL1     | compound heterozygous | 73.649446                     | nonsynonymous SNV          | uc010mj.1.c.G332A.p.R1108Q                 | 0.02                   | rs117476938 |                 |                      |            | chr14      | 101347803  | C     | T        | 248.5         | 0/1               | 0/1               | 0/1              |     |
| 1131    | RTL1     | compound heterozygous | 73.649446                     | nonsynonymous SNV          | uc010mj.1.c.C1672.p.F55T                   | 0.01                   | rs41266580  |                 |                      |            | chr14      | 10134944   | G     | G        | 1248.4        | 0/1               | 0/1               | 0/1              |     |
| 1131    | RYR1     | compound heterozygous | 0.0058976                     | nonsynonymous SNV          | uc0001z.3.c.A207I.p.S38R                   | 2.37E-04               | rs143771708 | 0.158           | P                    | 4.41       | chr1       | 8891269    | C     | T        | 189.8         | 0/1               | 0/1               | 0/1              |     |
| 2025    | SAM03    | compound heterozygous | 29.429111                     | nonsynonymous SNV          | uc0020iu.3.c.G13498C.p.D4500H              | 3.01E-03               | rs150336398 | 0.45689         | P                    | 3.76       | chr19      | 30957626   | G     | C        | 1245.1        | 0/1               | 0/1               | 0/1              |     |
| 2025    | SAM03    | compound heterozygous | 29.429111                     | nonsynonymous SNV          | uc003aby.3.c.G541A.p.D181N                 | 2.22E-03               | rs150968705 | 0.99            | D                    | 5.31       | chr6       | 130505611  | C     | T        | 2037.7        | 0/1               | 0/1               | 0/1              |     |
| 2025    | SAM03    | compound heterozygous | 29.429111                     | nonsynonymous SNV          | uc003aby.3.c.G303T.p.R101S                 | 5.69E-04               | rs138130162 | 0               | B                    | -4.5       | chr6       | 130530720  | C     | A        | 1812.8        | 0/1               | 0/1               | 0/1              |     |
| 4405    | SCARF2   | compound heterozygous | NA                            | nonsynonymous SNV          | uc002zsj.2.c.C1982T.p.P661L                | 0.02                   | rs9680797   | 0.563889        | NA                   | 2.78       | chr22      | 20780296   | G     | A        | 424.7         | 0/1               | 0/1               | 0/1              |     |
| 4405    | SCARF2   | compound heterozygous | NA                            | nonsynonymous SNV          | uc002zsj.2.c.C1661T.p.S554L                | 2.83E-03               | rs150853613 | 0.564209        | NA                   | 4.36       | chr22      | 20781732   | G     | A        | 1787.6        | 0/1               | 0/1               | 0/1              |     |
| 4405    | SCML4    | compound heterozygous | 50.224109                     | nonsynonymous SNV          | uc003pry.4.c.C283T.p.R95W                  | 0.02                   | rs56215636  |                 |                      |            | chr6       | 108029180  | A     | T        | 661.2         | 0/1               | 0/1               | 0/1              |     |
| 4405    | SCML4    | compound heterozygous | 50.224109                     | nonsynonymous SNV          | uc003pry.4.c.G142A.p.A48T                  | 1.90E-03               | rs143639662 | 0               | B                    | 0.998      | chr6       | 108080864  | C     | T        | 680.3         | 0/1               | 0/1               | 0/1              |     |
| 2001    | SCN5A    | compound heterozygous | 73.625855                     | nonsynonymous SNV          | uc010pl.3.c.T4612C.p.S38R                  | 2.07E-03               | rs202064411 |                 |                      |            | chr2       | 167069594  | G     | A        | 17500.7       | 0/1               | 0/1               | 0/1              |     |
| 2001    | SCN5A    | compound heterozygous | 73.625855                     | nonsynonymous SNV          | uc010pl.3.c.G3329A.p.R1110Q                | 0.02                   | rs74401238  |                 |                      |            | chr2       | 167108385  | G     | T        | 10215.2       | 0/1               | 0/1               | 0/1              |     |
| 135     | SCRN3    | homozygous rare       | 53.851144                     | frameshift deletion        | uc002uis.3.c.477_489del.p.158_163del       |                        |             |                 |                      |            | chr2       | 175292598  | T     | A        | 2873.8        | 0/1               | 0/1               | 0/1              |     |
| 3731    | SCUBE1   | homozygous rare       | 3.9278132                     | nonsynonymous SNV          | uc003bdt.2.c.C674T.p.T225M                 | 9.38E-03               | rs73420094  | 0               | B                    | 0.643      | chr22      | 43654278   | G     | A        | 1903.7        | 0/1               | 0/1               | 0/1              |     |
| 2002    | SEL1L2   | compound heterozygous | 77.229299                     | nonsynonymous SNV          | uc010gdf.3.c.C1162T.p.P388S                | 1.80E-04               | rs201283948 | 0.999           | D                    | 2.84       | chr20      | 13850792   | G     | A        | 3324.8        | 0/1               | 0/1               | 0/1              |     |
| 2002    | SEL1L2   | compound heterozygous | 77.229299                     | nonsynonymous SNV          | uc010gcf.3.c.A577G.p.I193V                 | 0.02                   | rs141957868 | 0.588           | P                    | 5.24       | chr20      | 13869131   | T     | T        | 678.4         | 0/1               | 0/1               | 0/1              |     |
| 2035    | SERINC2  | compound heterozygous | 66.165369                     | nonsynonymous SNV          | uc001bst.3.c.G259A.p.D87N                  | 5.64E-03               | rs112561697 | 0.024           | B                    | 3.95       | chr1       | 31897587   | G     | A        | 2388.4        | 0/1               | 0/1               | 0/1              |     |
| 2035    | SERINC2  | compound heterozygous | 66.165369                     | nonsynonymous SNV          | uc001bst.3.c.G563C.p.R181P                 | 4.07E-05               | rs113753753 | 0.988           | D                    | -4.65      | chr1       | 31898713   | G     | C        | 1074.6        | 0/1               | 0/1               | 0/1              |     |
| 2812    | SEZ1L2   | homozygous rare       | 6.5758434                     | nonsynonymous SNV          | uc002duz.4.c.G1210A.p.D44D                 | 0.02                   | rs113753753 | 0.988           | D                    | 5.35       | chr16      | 29861206   | C     | T        | 2553.3        | 0/1               | 0/1               | 0/1              |     |
| 2028    | SID1     | deNovo                | 51.281332                     | nonframeshift substitution | SGK223:uc002vz3.1.exon2.c.1701T>A          |                        |             |                 |                      |            | chr3       | 8231718    | G     | T        | 715.1         | 0/1               | 0/1               | 0/1              |     |
| 2010    | SID1     | deNovo                | 9.7782496                     | nonsynonymous SNV          | uc010blj.2.c.G818A.p.R273Q                 | 3.25E-05               | rs147948601 | 0.001           | B                    | 2.24       | chr3       | 113346530  | G     | A        | 1272.2        | 0/1               | 0/1               | 0/1              |     |
| 2010    | SLC22A31 | homozygous rare       | NA                            | nonframeshift substitution | SLC22A31:uc021fmr.1.exon4.c.233_234AT      |                        |             |                 |                      |            | chr16      | 98265100   | GC    | AT       | 2242.8        | 0/1               | 0/1               | 0/1              |     |
| 2035    | SLC26A7  | compound heterozygous | 62.096013                     | nonsynonymous SNV          | uc003yez.3.c.A643G.p.I215V                 | 0.02                   | rs16912250  | 0.004           | B                    | 4.49       | chr8       | 92346523   | A     | T        | 4861.5        | 0/1               | 0/1               | 0/1              |     |
| 2035    | SLC26A7  | compound heterozygous | 62.096013                     | nonsynonymous SNV          | uc003yez.3.c.A1454T.p.E485V                | 3.22E-03               | rs140569478 | 0.01            | B                    | 5.33       | chr8       | 92375732   | A     | G        | 2366.5        | 0/1               | 0/1               | 0/1              |     |
| 2023    | SLC27A4  | homozygous rare       | 7.1950932                     | nonsynonymous SNV          | uc004but.3.c.A1052G.p.N351S                | 0.02                   | rs111417655 | 0               | B                    | -1.94      | chr9       | 131115368  | A     | A        | 2414.4        | 0/1               | 0/1               | 0/1              |     |
| 2034    | SLC6A17  | homozygous rare       | 18.901864                     | nonframeshift substitution | SLC6A17:uc009wfg.3.exon2.c.168_169CA       |                        |             |                 |                      |            | chr1       | 110709719  | TG    | CA       | 4217.5        | 0/1               | 0/1               | 0/1              |     |
| 2035    | SLC6A17  | homozygous rare       | 18.901864                     | nonframeshift substitution | SLC6A17:uc009wfg.3.exon2.c.168_169CA       |                        |             |                 |                      |            | chr1       | 110709719  | TG    | CA       | 3111.2        | 0/1               | 0/1               | 0/1              |     |
| 10      | SLC6A17  | compound heterozygous | 80.337344                     | nonsynonymous SNV          | SLC6A17:uc009wfg.3.exon2.c.168_169CA       |                        |             |                 |                      |            | chr1       | 110709719  | TG    | CA       | 914.3         | 0/1               | 0/1               | 0/1              |     |
| 10      | SLC6A17  | compound heterozygous | 80.337344                     | nonsynonymous SNV          | uc0030yk.3.c.G1124A.p.R375Q                | 4.23E-03               | rs149382749 | 1               | D                    | 4.94       | chr8       | 70667793   | G     | T        | 1006.9        | 0/1               | 0/1               | 0/1              |     |
| 152     | SMARCAD1 | compound heterozygous | 70.582685                     | nonsynonymous SNV          | uc0030yk.3.c.G685A.p.A229T                 | 8.78E-04               | rs111622961 | 0.003           | B                    | 4.12       | chr8       | 70744224   | C     | T        | 1497.5        | 0/1               | 0/1               | 0/1              |     |
| 54      | SMARCAD1 | compound heterozygous | 70.582685                     | nonsynonymous SNV          | uc011cdw.2.c.T37C.p.W13R                   | 8.95E-04               | rs200569328 | 0.998           | D                    | 5.35       | chr4       | 95185903   | C     | T        | 1380.2        | 0/1               | 0/1               | 0/1              |     |
| 54      | SMARCAD1 | compound heterozygous | 70.582685                     | nonsynonymous SNV          | uc011cdw.2.c.C637T.p.H213Y                 | 8.95E-04               | rs151125076 | 0.958           | D                    | 5.07       | chr4       | 95197608   | C     | T        | 568.2         | 0/1               | 0/1               | 0/1              |     |
| 69      | SNRPC    | homozygous rare       | 51.037981                     | nonframeshift substitution | SNRPC:uc021yyw.1.exon1.c.41_41delinsATCT   |                        |             |                 |                      |            | chr6       | 34725658   | G     | T        | 6487.5        | 0/1               | 0/1               | 0/1              |     |
| 69      | SON      | compound heterozygous | 1.9933947                     | nonsynonymous SNV          | uc002ysg.3.c.T517G.p.L173V                 | 4.07E-05               | rs15170616  | 0.813           | P                    | 4.04       | chr21      | 34925081   | T     | G        | 529.5         | 0/1               | 0/1               | 0/1              |     |
| 69      | SON      | compound heterozygous | 1.9933947                     | nonsynonymous SNV          | uc002ysg.3.c.G1063A.p.A355T                | 1.65E-05               | rs140276173 | 0               | B                    | 2.16       | chr21      | 34925627</ |       |          |               |                   |                   |                  |     |

| Proband | Gene     | Inheritance           | Residual Variation Intoleranc e Score | Exonic Function            | Amino Acid Change                         | Minor Allele Frequency EXAC | dbSNP138    | PolyPhen2 Score | PolyPhen2 Prediction | GERP Score | Chromosome | Position  | Ref | Alt | Quality Score | Paternal Genotype | Maternal Genotype | Proband Genotype |
|---------|----------|-----------------------|---------------------------------------|----------------------------|-------------------------------------------|-----------------------------|-------------|-----------------|----------------------|------------|------------|-----------|-----|-----|---------------|-------------------|-------------------|------------------|
| 289     | THSD7B   | compound heterozygous |                                       | nonsynonymous SNV          | uc002bvb.3.c.G635A.p.R212H                | 0.02                        | rs61741426  |                 |                      |            | chr2       | 137825550 | G   | A   | 375.7         | 0/0               | 0/1               | 0/1              |
| 289     | THSD7B   | compound heterozygous |                                       | nonsynonymous SNV          | uc002bvb.3.c.C1400T.p.T467M               | 3.76E-04                    | rs61741154  |                 |                      |            | chr2       | 137988713 | C   | T   | 389.9         | 0/1               | 0/0               | 0/1              |
| 152     | TIAM1    | homozygous rare       | 9.8431234                             | nonframeshift substitution | uc011adk.1.c.739_740AT:TIAM1              |                             |             |                 |                      |            | chr21      | 32638549  | CC  | AT  | 2434          | 0/1               | 0/1               | 0/1              |
| 749     | TIAM1    | compound heterozygous | 9.8431234                             | nonsynonymous SNV          | uc011adk.1.c.A4226G.p.K1409R              | 8.42E-03                    | rs111536576 | 0.178           | P                    | 0.538      | chr21      | 32493056  | T   | C   | 1193          | 0/1               | 0/1               | 0/1              |
| 749     | TIAM1    | compound heterozygous | 9.8431234                             | nonsynonymous SNV          | uc011adk.1.c.G92A.p.R31H                  | 8.38E-03                    | rs141720377 | 0.999           | D                    | 3.67       | chr21      | 32639197  | C   | T   | 1146          | 0/0               | 0/1               | 0/1              |
| 3781    | TMIP1    | homozygous rare       | 58.262562                             | nonsynonymous SNV          | uc011mr.1.c.C32T.p.P11L                   | 0.01                        | rs1043428   |                 |                      |            | chrX       | 4744663   | T   | T   | 1592.9        | 0/1               | 0/1               | 0/1              |
| 7952    | TJAP1    | homozygous rare       | 69.509318                             | nonsynonymous SNV          | uc0101yp.2.c.G100A.p.D34N                 | 6.42E-03                    | rs146174516 | 0.941           | D                    | 4.47       | chr7       | 43469358  | G   | A   | 1403.2        | 0/1               | 0/1               | 0/1              |
| 3721    | TMEM184A | homozygous rare       | 45.570889                             | nonframeshift substitution | uc003skt.4.c.1105_1105delinsGGCC:TMEM184A |                             |             |                 |                      |            | chr7       | 1586662   | G   | T   | 3157.2        | 0/1               | 0/1               | 0/1              |
| 89      | TMIE     | homozygous rare       | 41.247336                             | nonframeshift deletion     | uc010h9.1.c.391_393del:p.131_131del       |                             |             |                 |                      |            | chr9       | 48751099  | G   | G   | 1574.5        | 0/1               | 0/1               | 0/1              |
| 1346    | TMFR3S13 | homozygous rare       | 84.642604                             | nonsynonymous SNV          | uc0022ou.3.c.G1304T.p.R435L               | 0.02                        | rs80264810  |                 |                      |            | chr11      | 117779305 | G   | G   | 641.6         | 0/1               | 0/1               | 0/1              |
| 151     | TMPT     | homozygous rare       | 87.402689                             | nonsynonymous SNV          | uc003nmc.3.c.G460A.p.A154T                | 0.02                        | rs1800460   | 0.848           | P                    | -0.936     | chr6       | 18139228  | C   | C   | 2051.1        | 0/1               | 0/1               | 0/1              |
| 7760    | TRAF4    | deNovo                | 26.533381                             | stopgain SNV               | uc002hcs.3.c.C622T.p.Q208X                |                             |             |                 |                      |            | chr17      | 27075439  | C   | T   | 377.1         | 0/0               | 0/0               | 0/1              |
| 66      | TRGV3    | homozygous rare       | NA                                    | nonsynonymous SNV          | uc003gr.2.c.A332C.p.Y111S                 | 0.01                        | rs150804886 |                 |                      |            | chr7       | 38398135  | T   | G   | 1692.7        | 0/1               | 0/1               | 0/1              |
| 2028    | TRMT11   | homozygous rare       | 40.44586                              | nonsynonymous SNV          | uc003qam.3.c.A916G.p.I306V                | 0.02                        | rs116913944 | 0.026           | B                    | 3.95       | chr6       | 126332554 | A   | G   | 2469.7        | 0/1               | 0/1               | 0/1              |
| 23      | TRPM3    | compound heterozygous | 6.982779                              | nonsynonymous SNV          | uc004ah.3.c.G4012A.p.G1338R               | 3.46E-03                    | rs148192709 | 0.988           | D                    | 5.25       | chr9       | 73131387  | C   | T   | 303.5         | 0/1               | 0/1               | 0/1              |
| 23      | TRPM3    | compound heterozygous | 6.982779                              | nonsynonymous SNV          | uc004ahv.3.c.C2105G.p.S702C               | 1.63E-05                    | rs138882109 | 0.961           | D                    | 5.24       | chr9       | 73218319  | G   | C   | 425.5         | 0/0               | 0/1               | 0/1              |
| 2020    | TSC2     | compound heterozygous | 0.8728474                             | nonsynonymous SNV          | uc0022op.3.c.G500A.p.R167Q                | 0.01                        | rs1800725   | 0.999           | D                    | 4.66       | chr16      | 2110795   | G   | G   | 1870.9        | 0/1               | 0/1               | 0/1              |
| 62      | TSC2     | compound heterozygous | 0.8728474                             | nonsynonymous SNV          | uc0022op.3.c.G500A.p.R167Q                | 0.01                        | rs1800725   | 0.999           | D                    | 4.66       | chr16      | 2110795   | G   | G   | 941.9         | 0/0               | 0/1               | 0/1              |
| 62      | TSC2     | compound heterozygous | 0.8728474                             | nonsynonymous SNV          | uc0022op.3.c.G500A.p.R167Q                | 0.01                        | rs1800725   | 0.999           | D                    | 4.66       | chr16      | 2110795   | G   | G   | 763.6         | 0/1               | 0/0               | 0/1              |
| 28      | TSC22D1  | compound heterozygous | 5.3432413                             | nonsynonymous SNV          | uc0022ocq.3.c.A149G.p.H50R                | 2.17E-04                    | rs184611539 |                 |                      |            | chr16      | 2133636   | A   | G   | 529.7         | 0/1               | 0/1               | 0/1              |
| 28      | TSC22D1  | compound heterozygous | 5.3432413                             | nonsynonymous SNV          | uc001uzo.2.c.A1667G.p.Y556C               | 0.01                        | rs41288339  |                 |                      |            | chr13      | 45008147  | T   | C   | 1662.3        | 0/0               | 0/1               | 0/1              |
| 28      | TSC22D1  | compound heterozygous | 5.3432413                             | nonframeshift deletion     | uc001luzn.4.c.1343_1345del:p.448_449del   | 0.01                        | rs201688574 |                 |                      |            | chr13      | 45148865  | T   | T   | 1810.7        | 0/1               | 0/1               | 0/1              |
| 3765    | TSHR     | deNovo                | 54.098844                             | nonsynonymous SNV          | uc001xvb.1.c.G100A.p.E34K                 | 1.87E-04                    | rs45499704  | 0.023           | B                    | 2.24       | chr14      | 81422124  | G   | A   | 301.9         | 0/0               | 0/1               | 0/1              |
| 749     | TSH21    | compound heterozygous | 5.0070771                             | nonsynonymous SNV          | uc021uh.1.c.G1402A.p.A468T                | 0.02                        | rs33930274  | 0               | B                    | -9.83      | chr18      | 72998989  | G   | A   | 781           | 0/0               | 0/1               | 0/1              |
| 749     | TSH21    | compound heterozygous | 5.0070771                             | nonsynonymous SNV          | uc021uh.1.c.G2591A.p.R864Q                | 1.29E-03                    | rs150160967 | 0.977           | D                    | 4.83       | chr18      | 73000088  | A   | A   | 736.3         | 0/1               | 0/0               | 0/1              |
| 2033    | TTC25    | homozygous rare       | NA                                    | nonsynonymous SNV          | uc0022ia.4.c.C10T.p.P4S                   | 0.02                        | rs45156586  |                 |                      |            | chr17      | 40093686  | T   | T   | 3814.8        | 0/1               | 0/1               | 0/1              |
| 53      | TTC40    | compound heterozygous | NA                                    | nonsynonymous SNV          | uc021qbc.1.c.G5520A.p.M1840I              | 7.48E-04                    | rs144154094 | 0.410823        | NA                   | 0.0344     | chr10      | 134671148 | G   | T   | 1843.6        | 0/1               | 0/0               | 0/1              |
| 53      | TTC40    | compound heterozygous | NA                                    | nonsynonymous SNV          | uc021qbc.1.c.T5260C.p.S1754P              | 7.48E-04                    | rs144154094 | 0.410823        | NA                   | 0.0344     | chr10      | 134672690 | A   | G   | 563.8         | 0/0               | 0/1               | 0/1              |
| 313     | TTL6     | homozygous rare       | 44.031611                             | frameshift deletion        | uc021zlm.1.c.154_170del:p.52_57del        | 0.02                        |             |                 |                      |            | chr17      | 46882286  | G   | G   | 1155.6        | 0/1               | 0/1               | 0/1              |
| 151     | TXNDC16  | homozygous rare       | 88.110403                             | nonsynonymous SNV          | uc001wzs.3.c.A1691G.p.D564G               | 0.02                        | rs61744423  | 0.831           | P                    | 5          | chr14      | 52923820  | T   | C   | 776.9         | 0/1               | 0/1               | 0/1              |
| 2035    | UBR1     | compound heterozygous | 16.814107                             | nonsynonymous SNV          | uc001zqz.3.c.A4834C.p.R1612G              | 5.45E-03                    | rs78948790  | 0.951           | D                    | 3.26       | chr15      | 43250212  | C   | C   | 2869.1        | 0/1               | 0/0               | 0/1              |
| 2035    | UBR1     | compound heterozygous | 16.814107                             | nonsynonymous SNV          | uc001zqz.3.c.A2695G.p.I899V               | 0.02                        | rs35069201  | 0               | B                    | -3         | chr15      | 43317071  | T   | T   | 5287.2        | 0/1               | 0/1               | 0/1              |
| 313     | UBT1L1   | homozygous rare       | NA                                    | nonsynonymous SNV          | uc010rb.2.c.C346T.p.P116S                 |                             |             |                 |                      |            | chr11      | 89819463  | C   | C   | 1361.4        | 0/1               | 0/1               | 0/1              |
| 45      | UGT2B7   | homozygous rare       | 40.563812                             | nonframeshift substitution | uc003heg.4.c.801_802TC:UGT2B7             |                             |             |                 |                      |            | chr4       | 69694337  | AT  | TC  | 5163.8        | 0/1               | 0/1               | 0/1              |
| 89      | UGT2B7   | homozygous rare       | 40.563812                             | nonframeshift substitution | uc003heg.4.c.801_802TC:UGT2B7             |                             |             |                 |                      |            | chr4       | 69694337  | AT  | TC  | 1983.7        | 0/1               | 0/1               | 0/1              |
| 313     | UGT2B7   | homozygous rare       | 40.563812                             | nonframeshift substitution | uc003heg.4.c.801_802TC:UGT2B7             |                             |             |                 |                      |            | chr4       | 69694337  | AT  | TC  | 2844.3        | 0/1               | 0/1               | 0/1              |
| 2001    | UIMC1    | compound heterozygous | 59.105921                             | nonsynonymous SNV          | uc003mf.2.c.T580C.p.Y194H                 | 2.14E-03                    | rs115224789 | 0.99            | D                    | 5.56       | chr5       | 176335682 | A   | G   | 6584.8        | 0/1               | 0/1               | 0/1              |
| 2001    | UIMC1    | compound heterozygous | 59.105921                             | nonsynonymous SNV          | uc021yil.1.c.T1058C.p.M353T               | 5.20E-04                    | rs143282828 | 0.009           | B                    | -0.432     | chr5       | 176395698 | A   | G   | 11345.9       | 0/1               | 0/1               | 0/1              |
| 3737    | VAV2     | compound heterozygous | 2.5536683                             | nonsynonymous SNV          | uc004cer.3.c.G2396A.p.R799Q               | 2.85E-04                    | rs138753594 | 0.997           | D                    | 4.63       | chr9       | 136633640 | C   | T   | 360.1         | 0/1               | 0/0               | 0/1              |
| 3737    | VAV2     | compound heterozygous | 2.5536683                             | nonsynonymous SNV          | uc004cer.3.c.C2337G.p.I779M               | 0.01                        | rs61751477  | 0.031           | B                    | 0.87       | chr9       | 136633699 | G   | C   | 584.9         | 0/1               | 0/1               | 0/1              |
| 54      | VCAN     | compound heterozygous | 19.957537                             | nonsynonymous SNV          | uc003kl.3.c.G241A.p.V81I                  | 8.13E-06                    | rs1410000   | 0.877           | D                    | 3.44       | chr5       | 82833071  | A   | G   | 830.1         | 0/1               | 0/0               | 0/1              |
| 54      | VCAN     | compound heterozygous | 19.957537                             | nonsynonymous SNV          | uc003kl.3.c.A596G.p.E199G                 | 3.00E-03                    | rs61749614  | 0.01            | B                    | 1.67       | chr5       | 82833426  | A   | A   | 399.5         | 0/1               | 0/0               | 0/1              |
| 7952    | VPS13A   | compound heterozygous | 2.034678                              | nonsynonymous SNV          | uc004ap.4.c.T293C.p.V99R                  | 0.02                        | rs78048112  | 0.006           | B                    | 2.43       | chr9       | 5918155   | T   | A   | 5918.5        | 0/1               | 0/1               | 0/1              |
| 7952    | VPS13A   | compound heterozygous | 2.034678                              | nonsynonymous SNV          | uc004aks.3.c.T7340C.p.I2447T              | 1.55E-03                    | rs141138349 | 0.307           | P                    | 4.87       | chr9       | 79968362  | T   | C   | 3403.8        | 0/0               | 0/1               | 0/1              |
| 3781    | VPS13B   | compound heterozygous | 17.504128                             | nonsynonymous SNV          | uc003yv.3.c.G6337A.p.D2113N               | 0.03                        | rs141138349 | 0.307           | P                    | 4.87       | chr9       | 79968362  | T   | C   | 3403.8        | 0/0               | 0/1               | 0/1              |
| 3781    | VPS13B   | compound heterozygous | 17.504128                             | nonsynonymous SNV          | uc003yv.3.c.G6337A.p.D2113N               | 0.03                        | rs141138349 | 0.307           | P                    | 4.87       | chr9       | 79968362  | T   | C   | 3403.8        | 0/0               | 0/1               | 0/1              |
| 2812    | VPS39    | deNovo                | 11.276244                             | nonsynonymous SNV          | uc003yv.3.c.C8645T.p.P2882L               | 9.43E-04                    | rs145890213 | 0.121           | B                    | 4.45       | chr8       | 100831065 | C   | T   | 1702.2        | 0/1               | 0/0               | 0/1              |
| 2034    | VTN      | compound heterozygous | 21.650153                             | nonsynonymous SNV          | uc001zpc.3.c.G574A.p.G192R                | 0.02                        | rs145890213 | 0.121           | B                    | 4.45       | chr8       | 100831065 | C   | T   | 1134          | 0/0               | 0/1               | 0/1              |
| 2034    | VTN      | compound heterozygous | 21.650153                             | nonsynonymous SNV          | uc002hbc.3.c.A831C.p.K277N                | 2.44E-05                    | rs201356175 | 0.001           | B                    | -9.54      | chr17      | 26695690  | T   | G   | 2457.8        | 0/1               | 0/1               | 0/1              |
| 2034    | VTN      | compound heterozygous | 21.650153                             | nonsynonymous SNV          | uc002hbc.3.c.A307T.p.I126V                | 4.82E-03                    | rs112887300 | 0               | B                    | 1.03       | chr17      | 26696680  | T   | A   | 599.4         | 0/1               | 0/1               | 0/1              |
| 1131    | WNR2     | compound heterozygous | NA                                    | nonsynonymous SNV          | uc004at.3.c.C2975T.p.S992L                |                             | rs41296061  |                 |                      |            | chr9       | 96051100  | C   | T   | 430.6         | 0/1               | 0/1               | 0/1              |
| 1131    | WNR2     | compound heterozygous | NA                                    | nonsynonymous SNV          | uc004at.1.c.G118T.p.A49S                  | 1.63E-05                    | rs41296061  |                 |                      |            | chr9       | 96051369  | G   | T   | 303.6         | 0/1               | 0/1               | 0/1              |
| 17      | WKC3     | homozygous rare       | 85.851616                             | nonsynonymous SNV          | uc004csx.4.c.G11A.p.E51K                  | 5.15E-03                    | rs61748714  | 0.956           | D                    | 4.96       | chrX       | 10036461  | A   | A   | 1042.1        | 0/1               | 0/1               | 0/1              |
| 3721    | XPO4     | compound heterozygous | 12.974758                             | nonsynonymous SNV          | uc001unq.4.c.A2695T.p.I899L               | 0.01                        | rs117470697 | 0               | B                    | -1.86      | chr13      | 21370371  | A   | A   | 2858.7        | 0/1               | 0/1               | 0/1              |
| 3721    | XPO4     | compound heterozygous | 12.974758                             | nonsynonymous SNV          | uc001unq.4.c.A446G.p.N149S                | 0.02                        | rs17320607  | 0.024           | B                    | 3.41       | chr13      | 21429776  | T   | C   | 2956.7        | 0/1               | 0/1               | 0/1              |
| 2023    | ZFXH3    | compound heterozygous | 0.1179523                             | nonsynonymous SNV          | uc002fd.3.c.G247T.p.A83S                  | 0.01                        | rs2213978   | 0.733599        | NA                   | 4.77       | chr16      | 72984595  | C   | A   | 1927          | 0/0               | 0/1               | 0/1              |
| 2023    | ZFXH3    | compound heterozygous | 0.1179523                             | nonsynonymous SNV          | uc002fd.3.c.G247T.p.A83S                  | 0.01                        | rs2213978   | 0.733599        | NA                   | 4.77       | chr16      | 72984595  | C   | A   | 1927          | 0/0               | 0/1               | 0/1              |
| 24      | ZFXH4    | compound heterozygous | 2.435716                              | nonsynonymous SNV          | uc003yav.1.c.G196C.p.V66L                 | 0.02                        | rs56261025  |                 |                      |            | chr8       | 77616519  | G   | C   | 767.1         | 0/1               | 0/1               | 0/1              |
| 24      | ZFXH4    | compound heterozygous | 2.435716                              | nonsynonymous SNV          | uc003yav.1.c.C7271T.p.P2424L              | 5.78E                       |             |                 |                      |            |            |           |     |     |               |                   |                   |                  |
