# Supplementary material for: De Novo and Rare Variants at Multiple Loci Support the Oligogenic Origins of Atrioventricular Septal Heart Defects
Source: PubMed Central journal article supplement (PMC4825975; doi:10.1371/journal.pgen.1005963), 2016-04-08
Supplement: pgen.1005963.s012.pdf [file pgen.1005963.s012.pdf]

**Table S5. 756 Genes Associated with Cardiac Malformations in Human Disease or Mouse Knockout Model**

| Known CHD Genes (Fahed et. al.) | Human Paralog of Genes with Mouse CHD Phenotype |
|---------------------------------|-------------------------------------------------|
| ACP6                            | ABI1                                            |
| ACTC                            | ABL1                                            |
| ACVR1                           | ABRA                                            |
| ACVR2B                          | ACE                                             |
| ADAMTS2                         | ACKR3                                           |
| ALDH1A2                         | ACTC1                                           |
| ANKRD1                          | ACVR2A                                          |
| BCL9                            | ACVRL1                                          |
| CD160                           | ADAM10                                          |
| CEP70                           | ADAM12                                          |
| CFC1                            | ADAM15                                          |
| CITED2                          | ADAM17                                          |
| CNOT6                           | ADAM19                                          |
| CRELD1                          | ADAMTS12                                        |
| CSTB                            | ADAMTS9                                         |
| CYFIP1                          | ADM                                             |
| EDIL3                           | ADRBK1                                          |
| EHMT1                           | AGER                                            |
| ELN                             | AGTR1                                           |
| FAIM                            | AGTR2                                           |
| FAM62C                          | AHR                                             |
| FDFT1                           | AIP                                             |
| FKBP6                           | AKAP6                                           |
| FLT4                            | ANGPT1                                          |
| FMO5                            | ANGPT2                                          |
| FOG2                            | ANGPTL4                                         |
| FOXH1                           | ANGPTL6                                         |
| FOXL2                           | ANKRD17                                         |
| FSTL3                           | ANXA1                                           |
| GATA4                           | ANXA2                                           |
| GATA6                           | APC                                             |
| GDF1                            | APH1A                                           |
| GFPT2                           | APLNR                                           |
| GJA1                            | APOE                                            |
| GJA5                            | ARAP3                                           |
| GJA8                            | ARHGEF11                                        |
| GNA11                           | ARHGEF12                                        |
| HAND2                           | ARHGEF15                                        |
| HRAS                            | ARHGEF4                                         |
| IRX4                            | ARID3B                                          |
| JAG1                            | ARNT                                            |
| LEFTY2                          | ARSB                                            |
| MED13L                          | ATE1                                            |
| MID1                            | ATP2A2                                          |
| MIER2                           | AXIN1                                           |
| MYH11                           | B4GALT1                                         |
| MYH6                            | B9D1                                            |
| MYH7                            | BAZ1B                                           |
| NBPF11                          | BECN1                                           |
| NEIL2                           | BICC1                                           |
| NIPA1                           | BIRC2                                           |
| NIPA2                           | BIRC3                                           |
| NKX2-5                          | BIRC6                                           |
| NKX2-6                          | BMP1                                            |
| NODAL                           | BMP10                                           |
| NOTCH1                          | BMP2                                            |
| NPHP3                           | BMP4                                            |
| NSD1                            | BMPR1A                                          |
| PDGFRA                          | BRAF                                            |
| PDZK1                           | BRCA1                                           |
| PIK3CB                          | BTC                                             |
| PPM1K                           | BVES                                            |
| PRKAB2                          | C1GALT1                                         |
| PTBP1                           | CACNB2                                          |
| RAF1                            | CALR                                            |
| S1PR4                           | CAPN2                                           |
| SMAD6                           | CAPNS1                                          |
| SOX7                            | CASP3                                           |
| SSBP2                           | CASP7                                           |
| TAB2                            | CASP8                                           |
| TBX1                            | CASQ2                                           |
| TBX20                           | CAV3                                            |
| TBX5                            | CBS                                             |
| TDGF1                           | CCDC88A                                         |
| TFAP2B                          | CCL13                                           |
| TMEM167A                        | CCM2                                            |
| TMEM40                          | CCM2L                                           |
| TNFSF11                         | CCND1                                           |
| TUBGCP5                         | CCND2                                           |
| VCAN                            | CCND3                                           |
| VEGFA                           | CCNE1                                           |
| WDR18                           | CCNE2                                           |
| ZFPM2                           | CCNF                                            |
| ZIC3                            | CD151                                           |
| ZNF879                          | CD44                                            |
|                                 | CD47                                            |

|             |
|-------------|
| CDH1        |
| CDH13       |
| CDH2        |
| CDH5        |
| CDK2        |
| CDK4        |
| CDKN1A      |
| CFC1B       |
| CFL1        |
| CFLAR       |
| CHD7        |
| CHEK1       |
| CHM         |
| CHMP5       |
| CHRD        |
| CLEC4E      |
| CLIC4       |
| CLUAP1      |
| COL18A1     |
| COL2A1      |
| COMMD3-BMI1 |
| CRB2        |
| CREBBP      |
| CRHR2       |
| CRKL        |
| CSK         |
| CSNK2A1     |
| CSRP3       |
| CTBP1       |
| CTGF        |
| CTNNB1      |
| CTSS        |
| CUL4B       |
| CUL7        |
| CXADR       |
| CXCR3       |
| CXCR4       |
| CYP26A1     |
| CYP51A1     |
| CYR61       |
| DAND5       |
| DCBLD2      |
| DCHS1       |
| DDX17       |
| DDX5        |
| DES         |
| DHRS3       |
| DICER1      |
| DISP1       |
| DLC1        |
| DLL1        |
| DLL4        |
| DNM1L       |
| DNMT3B      |
| DOCK1       |
| DOT1L       |
| DUSP6       |
| DVL1        |
| DVL2        |
| DVL3        |
| E2F7        |
| E2F8        |
| ECE1        |
| ECE2        |
| ECSCR       |
| EDN1        |
| EDNRA       |
| EFNA1       |
| EFNB2       |
| EGFL7       |
| EGFR        |
| EGLN1       |
| EGLN3       |
| EGR1        |
| ELAVL1      |
| ENG         |
| ENPP2       |
| EP300       |
| EPAS1       |
| EPHA2       |
| EPHB4       |
| EPHX2       |
| EPN1        |
| EPN2        |
| EPO         |
| EPOR        |
| ERBB2       |
| ERBB3       |
| ERF         |

|         |
|---------|
| ERG     |
| ESAM    |
| ETS1    |
| ETS2    |
| ETV2    |
| ETV6    |
| F2      |
| F2R     |
| F2RL1   |
| F3      |
| F7      |
| FAT4    |
| FBLN1   |
| FBLN5   |
| FBN1    |
| FBXW7   |
| FES     |
| FGF10   |
| FGF16   |
| FGF19   |
| FGF2    |
| FGF8    |
| FGF9    |
| FGFR1   |
| FGFR2   |
| FGFRL1  |
| FGR     |
| FKBP1A  |
| FKBP1B  |
| FLI1    |
| FLNA    |
| FLRT3   |
| FLT1    |
| FLVCR1  |
| FN1     |
| FOSL1   |
| FOXA2   |
| FOXC1   |
| FOXC2   |
| FOXD3   |
| FOXF1   |
| FOXG1   |
| FOXJ1   |
| FOXM1   |
| FOXO1   |
| FOXP1   |
| FOXP4   |
| FRS2    |
| FSTL1   |
| FURIN   |
| FXN     |
| FZD1    |
| FZD2    |
| FZD4    |
| FZD5    |
| FZD7    |
| GAB1    |
| GAB2    |
| GAS1    |
| GATA1   |
| GATA2   |
| GATA5   |
| GATAD2A |
| GBX2    |
| GJC1    |
| GNA13   |
| GNAQ    |
| GPC3    |
| GPR124  |
| GPR126  |
| GPR4    |
| GRB2    |
| GSC     |
| H2AFX   |
| HAND1   |
| HAS2    |
| HBEGF   |
| HCCS    |
| HCK     |
| HCN4    |
| HDAC2   |
| HDAC5   |
| HDAC7   |
| HEXIM1  |
| HEY1    |
| HEY2    |
| HEYL    |
| HGS     |
| HHEX    |

|           |
|-----------|
| HIF1A     |
| HIF3A     |
| HIRA      |
| HIST1H1C  |
| HIST1H1D  |
| HIST1H1E  |
| HK2       |
| HOXA1     |
| HOXA13    |
| HOXA3     |
| HOXB4     |
| HPGD      |
| HPRT1     |
| HPSE      |
| HSD17B7   |
| HSP90B1   |
| HSPB11    |
| HSPB8     |
| HTR1B     |
| HTR2B     |
| HUS1      |
| ICAM1     |
| ID1       |
| ID3       |
| IDH2      |
| IDUA      |
| IFNGR1    |
| IFT172    |
| IFT27     |
| IFT57     |
| IFT88     |
| IGF1R     |
| IGF2      |
| IGF2R     |
| IHH       |
| IKBKAP    |
| IL1A      |
| IL1B      |
| IL6       |
| IL6ST     |
| ILK       |
| INSR      |
| INTU      |
| IRX3      |
| IRX5      |
| ISL1      |
| ITGA5     |
| ITGA6     |
| ITGAV     |
| ITGB1     |
| ITGB3     |
| ITGB4     |
| ITGB5     |
| ITGB8     |
| ITPA      |
| JMJD6     |
| JUN       |
| KAT2A     |
| KAT6A     |
| KAT7      |
| KCNH2     |
| KDM6A     |
| KDM8      |
| KDR       |
| KIDINS220 |
| KIF3A     |
| KIF3B     |
| KIFAP3    |
| KIT       |
| KLF15     |
| KLF5      |
| KLF6      |
| KRAS      |
| KRIT1     |
| KRT1      |
| LATS2     |
| LBX1      |
| LDB1      |
| LEF1      |
| LIG3      |
| LIMS1     |
| LIMS2     |
| LIN28A    |
| LMNA      |
| LMO2      |
| LRP5      |
| LUZP1     |
| LY6E      |
| MAML1     |

|        |
|--------|
| MAML3  |
| MAP2K5 |
| MAP3K3 |
| MAP3K7 |
| MAPK1  |
| MAPK11 |
| MAPK12 |
| MAPK14 |
| MAPK3  |
| MAPK7  |
| MB     |
| MCAM   |
| MDM4   |
| MECOM  |
| MED1   |
| MED12  |
| MED23  |
| MED24  |
| MEF2C  |
| MEGF8  |
| MEIS1  |
| MEN1   |
| MEOX2  |
| MESP1  |
| METAP2 |
| MGAT1  |
| MGP    |
| MIB1   |
| MIXL1  |
| MKL1   |
| MKL2   |
| MLST8  |
| MMP13  |
| MMP14  |
| MMP2   |
| MMP9   |
| MRE11A |
| MUS81  |
| MYB    |
| MYBPC3 |
| MYC    |
| MYCN   |
| MYH10  |
| MYH14  |
| MYH9   |
| MYL2   |
| MYL7   |
| MYLK3  |
| MYOCD  |
| MYOZ2  |
| NCOA6  |
| NCOR2  |
| NCSTN  |
| NDST1  |
| NEK8   |
| NFATC1 |
| NFATC3 |
| NFATC4 |
| NGFR   |
| NOG    |
| NOS1   |
| NOS2   |
| NOS3   |
| NOTCH3 |
| NOTCH4 |
| NOV    |
| NPM1   |
| NPRL3  |
| NR2F2  |
| NRARP  |
| NRP1   |
| NRP2   |
| NTF3   |
| NTRK3  |
| NUMB   |
| NXN    |
| OFD1   |
| OSR1   |
| OVOL2  |
| PAK4   |
| PALB2  |
| PAM    |
| PARVA  |
| PATZ1  |
| PAX1   |
| PAX3   |
| PAXIP1 |
| PBRM1  |
| PBX1   |

|          |
|----------|
| PCGF2    |
| PCSK6    |
| PDCD10   |
| PDGFA    |
| PDGFC    |
| PDGFRB   |
| PDPK1    |
| PDPN     |
| PDS5B    |
| PFKM     |
| PFN1     |
| PGF      |
| PHC1     |
| PIFO     |
| PIK3CA   |
| PITX2    |
| PKD1     |
| PKD2     |
| PKP2     |
| PLAT     |
| PLCE1    |
| PLCG1    |
| PLD1     |
| PLG      |
| PLVAP    |
| PLXND1   |
| PNN      |
| PNPLA2   |
| PNPLA6   |
| POFUT1   |
| POPDC2   |
| POR      |
| POSTN    |
| PPAP2B   |
| PPARG    |
| PPARGC1A |
| PPP3R1   |
| PRDM1    |
| PRDM6    |
| PRKAR1A  |
| PRKCI    |
| PROC     |
| PROS1    |
| PRRX1    |
| PRRX2    |
| PSEN1    |
| PSEN2    |
| PTCH1    |
| PTEN     |
| PTGER4   |
| PTGS1    |
| PTGS2    |
| PTH      |
| PTHLH    |
| PTK2     |
| PTK2B    |
| PTPN11   |
| PTPN12   |
| PTPRB    |
| PTPRJ    |
| PXN      |
| RAC1     |
| RAC2     |
| RAD23B   |
| RAMP2    |
| RAP1A    |
| RAPGEF2  |
| RARA     |
| RARB     |
| RARG     |
| RASA1    |
| RASA3    |
| RASIP1   |
| RB1      |
| RBL1     |
| RBL2     |
| RBP4     |
| RBPJ     |
| RDH10    |
| RECK     |
| REV3L    |
| RFX3     |
| RHEB     |
| RHOB     |
| RHOJ     |
| RIPK3    |
| RIPPLY3  |
| ROBO1    |
| ROBO2    |

|          |
|----------|
| ROBO4    |
| ROR1     |
| RUNX1    |
| RUNX2    |
| RXRA     |
| RXRB     |
| RYR1     |
| S1PR1    |
| S1PR2    |
| S1PR3    |
| SALL1    |
| SALL4    |
| SCXA     |
| SDC4     |
| SELL     |
| SEMA3C   |
| SEMA3D   |
| SEMA5A   |
| SERPINE1 |
| SERPINF1 |
| SETD2    |
| SHC1     |
| SHH      |
| SHOC2    |
| SHOX2    |
| SIRT1    |
| SIX1     |
| SLC20A1  |
| SLC34A2  |
| SLC6A4   |
| SLC8A1   |
| SLCO2A1  |
| SMAD1    |
| SMAD2    |
| SMAD3    |
| SMAD4    |
| SMAD5    |
| SMAD7    |
| SMAD9    |
| SMARCA4  |
| SMN1     |
| SMO      |
| SMYD1    |
| SNAI1    |
| SOS1     |
| SOX11    |
| SOX12    |
| SOX4     |
| SOX9     |
| SPEG     |
| SPEN     |
| SPHK1    |
| SPHK2    |
| SPP1     |
| SPTBN1   |
| SRF      |
| SRSF10   |
| STK11    |
| STK4     |
| SUFU     |
| TAB1     |
| TAL1     |
| TAX1BP1  |
| TBX18    |
| TBX2     |
| TBX3     |
| TBX4     |
| TBX6     |
| TCF21    |
| TCTN2    |
| TEAD1    |
| TEAD2    |
| TEK      |
| TFAM     |
| TFAP2A   |
| TGFB1    |
| TGFB2    |
| TGFB3    |
| TGFBR1   |
| TGFBR2   |
| TGFBR3   |
| TGIF1    |
| TGIF2    |
| TH       |
| THBD     |
| THBS1    |
| THBS2    |
| TIE1     |
| TIMP3    |

|          |
|----------|
| TLL1     |
| TLR2     |
| TMEM100  |
| TMEM38A  |
| TMEM38B  |
| TMOD1    |
| TNFRSF1A |
| TNNI3    |
| TNNT2    |
| TP53     |
| TRA2B    |
| TSC1     |
| TSC2     |
| TWIST2   |
| TXNRD2   |
| UBP1     |
| UBR1     |
| UBR2     |
| UBR4     |
| UBR5     |
| UNC5B    |
| USP8     |
| VANGL2   |
| VASH1    |
| VASH2    |
| VAV2     |
| VAV3     |
| VCAM1    |
| VCL      |
| VDR      |
| VEZF1    |
| VHL      |
| VIM      |
| VPS52    |
| WASF2    |
| WDPCP    |
| WDR83    |
| WHSC1    |
| WNT11    |
| WNT3A    |
| WNT7A    |
| WNT7B    |
| WRN      |
| WT1      |
| XPB1     |
| XIAP     |
| YAP1     |
| YWHAE    |
| ZFP36L1  |
| ZFPM1    |
| ZMIZ1    |
