# Supplementary material for: De Novo and Rare Variants at Multiple Loci Support the Oligogenic Origins of Atrioventricular Septal Heart Defects
Source: PubMed Central journal article supplement (PMC4825975; doi:10.1371/journal.pgen.1005963), 2016-04-08
Supplement: pgen.1005963.s013.pdf [file pgen.1005963.s013.pdf]

**Table S6. A Co-Expression Module of 934 Genes Includes *NKX2-5*, *CRELD1*, and *GATA4* is Enriched for Genes Associated with Cardiac Malformations**

*AADACL3*  
*AAR2*  
*ABI3*  
*ACKR2*  
*ACOT4*  
*ACP6*  
*ACTN4*  
*ACTR1B*  
*ACVR1*  
*ACVR2B*  
*ACYP2*  
*ADAM10*  
*ADAMTSL4*  
*ADRBK2*  
*AFAP1*  
*AFAP1L1*  
*AGAP3*  
*AGBL1*  
*AGMO*  
*AGO4*  
*AGPAT3*  
*AGPAT6*  
*AIDA*  
*AIPL1*  
*AJUBA*  
*AK4*  
*AKR1B1*  
*AKT1S1*  
*ALDH1L2*  
*ALG5*  
*ALKBH4*  
*AMOTL2*  
*ANK1*  
*ANK3*  
*ANKAR*  
*ANKFY1*  
*ANKH*  
*ANKHD1-EIF4EBP3*  
*ANKRD1*  
*ANKRD13A*  
*ANKRD17*  
*ANKRD28*  
*ANKRD32*  
*ANKRD39*

ANKRD40  
ANKZF1  
ANO6  
ANP32A  
ANXA5  
ANXA6  
APBA1  
APBB1  
APEH  
APH1A  
APLP2  
ARCN1  
ARHGAP10  
ARHGAP29  
ARHGEF26  
ARID1A  
ARIH1  
ARIH2  
ARL4D  
ARMC1  
ARMC2  
ARMCX2  
ASCC2  
ASCC3  
ATF1  
ATF3  
ATF7IP  
ATG12  
ATG5  
ATL2  
ATOH8  
ATP1A2  
ATP1B1  
ATP1B2  
ATP5G2  
ATP6AP1  
ATP6V0E1  
ATP7A  
ATP7B  
B3GALT6  
B3GNT7  
BACH2  
BAD  
BAG6  
BAHD1  
BAMBI  
BCHE

BCORL1  
BFAR  
BHLHE41  
BLOC1S2  
BLOC1S6  
BMP5  
BMPER  
BRD4  
BRD7  
BRD9  
BTBD11  
BTRC  
BUB1  
BUB1B  
BVES  
C10orf118  
C11orf84  
C12orf75  
C14orf2  
C16orf45  
C17orf49  
C18orf25  
C19orf44  
C1orf198  
C3orf20  
C3orf80  
C6orf222  
C6orf62  
C9orf84  
CALR3  
CALU  
CAMK2G  
CANT1  
CAPG  
CASP2  
CBFB  
CBX1  
CC2D1A  
CCAR1  
CCDC146  
CCDC166  
CCDC28A  
CCDC40  
CCDC88A  
CCDC88B  
CCDC91  
CCDC92

CCL27  
CCNY  
CD151  
CD1D  
CD320  
CD68  
CDAN1  
CDC14B  
CDC42EP5  
CDCA2  
CDH20  
CDK16  
CDKN1B  
CDKN2AIP  
CDYL2  
CELF1  
CENPE  
CEP55  
CEP78  
CERK  
CHD2  
CHMP6  
CHPF  
CHPF2  
CHST10  
CHTF8  
CKAP5  
CLN8  
CLPTM1L  
CNOT11  
CNOT7  
CNPPD1  
COL4A6  
COL9A3  
COLGALT2  
COMMD10  
COPA  
COPB2  
COPS5  
COQ10B  
CORIN  
COX15  
COX19  
COX5B  
CREB3  
CREB3L2  
CRELD1

CSNK1D  
CSNK1G1  
CTDSP2  
CTHRC1  
CTNNBL1  
CTNND1  
CTTN  
CTTNBP2NL  
CXCR4  
CXXC5  
CYHR1  
DAG1  
DBF4  
DBI  
DCAF12  
DCAF12L2  
DDN  
DDOST  
DDR1  
DDX20  
DDX3Y  
DENND2C  
DGKZ  
DHRS13  
DICER1  
DLGAP4  
DLST  
DNMT3A  
DOC2A  
DOCK1  
DOCK11  
DONSON  
DPH2  
DPPA4  
DPY30  
DPYSL2  
DZANK1  
E2F3  
EARS2  
ECI2  
EDIL3  
EEF1A2  
EEPD1  
EFCAB14  
EFNB1  
EGLN1  
EIF2S3

EIF5B  
ELAC1  
ELL2  
ELOVL5  
ELOVL6  
EMC1  
EMC4  
EMILIN1  
EMILIN2  
ENPP1  
ENY2  
EPHA7  
EPHB3  
ERO1L  
ESPL1  
ESR2  
ESYT1  
ESYT2  
ETS1  
ETV2  
EXOSC2  
FAM122B  
FAM161B  
FAM168A  
FAM168B  
FAM173A  
FAM173B  
FAM181A  
FAM198B  
FAM205A  
FAM20B  
FAM222B  
FAM26E  
FAM53C  
FAM73A  
FARSA  
FARSB  
FAT4  
FBLN2  
FBN2  
FBXO18  
FBXO30  
FBXO4  
FBXO40  
FBXO42  
FBXO43  
FBXW11

FBXW2  
FCHSD2  
FEM1A  
FGFR1OP2  
FGL2  
FIP1L1  
FITM1  
FKBP10  
FKBP1A  
FKBP2  
FLNB  
FN1  
FNDC3B  
FOPNL  
FOXB2  
FOXK2  
FOXN3  
FSTL4  
FTCD  
FUNDC2  
FURIN  
FYN  
G3BP2  
GAB1  
GALNS  
GATA4  
GATA5  
GATA6  
GDAP2  
GDF6  
GDI2  
GFOD1  
GFPT2  
GFRA3  
GGPS1  
GHITM  
GID8  
GIGYF1  
GIPC1  
GLCCI1  
GLIPR1L2  
GLRX2  
GMIP  
GMPPB  
GNB3  
GOLGA4  
GOLIM4

GPANK1  
GPATCH8  
GPD1L  
GPR108  
GPR182  
GRAP2  
GRIK4  
GRIP2  
GSK3B  
GTF2E2  
GXYLT1  
HAUS8  
HCFC2  
HCN4  
HDAC10  
HEATR5A  
HEATR5B  
HEG1  
HELZ2  
HESX1  
HEY1  
HHAT  
HIC2  
HIVEP3  
HLA-DMA  
HMG20A  
HMG20B  
HMGB3  
HMGCR  
HMGXB4  
HNRNPA2B1  
HNRNPM  
HNRNPUL1  
HOXD8  
HS1BP3  
HS6ST2  
HSDL2  
HSPA2  
HSPG2  
HTR2B  
ICK  
ID1  
IFNGR2  
IGF1  
IGF1R  
IGF2BP3  
IGFBP5



IGSF3  
IGSF9  
IMPA2  
IMPAD1  
IMPG1  
INO80  
INO80B  
INO80C  
INPPL1  
INTS10  
IPO4  
IRF2  
IRF2BP2  
IRF2BPL  
IRF3  
IRX4  
ITM2C  
ITPR1  
JAKMIP1  
JPH3  
KARS  
KCNG1  
KCNJ13  
KCNJ3  
KCNJ4  
KCTD6  
KDM2A  
KDM6B  
KDR  
KIAA0930  
KIAA1107  
KIAA1239  
KIAA1919  
KIAA2026  
KIF26B  
KITLG  
KLC2  
KLHL31  
KRT9  
KRTAP13-1  
LACC1  
LACTB  
LAMB2  
LAPTM4B  
LARP4B  
LASP1  
LATS1

LCA5  
LDLRAD2  
LDLRAD3  
LENEP  
LGALSL  
LIMD2  
LMBRD2  
LMF2  
LNX1  
LRIF1  
LRIG2  
LRRN4  
LUC7L  
LUC7L2  
LXN  
LZTS2  
MAFG  
MAGT1  
MAN1A1  
MAP10  
MAP2K1  
MAP3K1  
MAP3K2  
MAP7D1  
MAPK8IP1  
MAPK9  
MAPRE3  
MARCH6  
MARCH8  
MARCKS  
MARCKSL1  
MAZ  
MCMBP  
MDM2  
ME2  
MECOM  
MEGF9  
MEN1  
MEOX1  
MESP1  
MFSD10  
MGAT4B  
MIPEP  
MKL2  
MMP27  
MON2  
MPDZ

MPV17  
MRAP  
MROH1  
MRPL1  
MRPL10  
MRPL12  
MRPL16  
MRPL51  
MRPS11  
MRPS23  
MSL2  
MT3  
MTERFD3  
MTHFD1L  
MTMR12  
MTMR3  
MTMR9  
MYCBPAP  
MYH10  
MYLIP  
NCAM1  
NCK2  
NCL  
NCOR1  
NDC1  
NDUFA3  
NDUFAF7  
NDUFB3  
NDUFS5  
NEDD4  
NEIL3  
NELFA  
NFIA  
NFKBIL1  
NHSL1  
NINJ1  
NINL  
NKX2-5  
NLK  
NLRP5  
NOA1  
NOG  
NOX1  
NOXRED1  
NPEPPS  
NPFF  
NPLOC4

NR0B2  
NR1D1  
NR1D2  
NR3C2  
NRP1  
NUDT17  
NUP160  
NUP88  
OGDH  
OPLAH  
OSBPL2  
OSBPL6  
OSBPL8  
OSGIN1  
OSTM1  
OXCT1  
PABPC1  
PABPC4  
PANK4  
PAOX  
PAPPA  
PAPSS2  
PARG  
PARM1  
PAX2  
PAXBP1  
PCBP4  
PCDHGA8  
PCNX  
PCNXL4  
PD6D6IP  
PDHX  
PDK4  
PDS5B  
PEBP1  
PEX1  
PEX11B  
PFN1  
PGF  
PHF8  
PIGU  
PIP5K1A  
PITPNB  
PLCH1  
PLCZ1  
PLEK  
PLEK2

PLEKHA3  
PLEKHA4  
PLEKHA8  
PLEKHB2  
PLEKHG2  
PLEKHM3  
PLEKHO1  
PLK4  
PLXNC1  
PM20D2  
PMM1  
PMP22  
PNMT  
POLR2D  
POU2F1  
PPAT  
PPID  
PPM1L  
PPP1R11  
PPP1R17  
PPP1R36  
PPP1R3A  
PPP1R9A  
PPP2R3A  
PPP4R2  
PRDM6  
PREB  
PRIMPOL  
PRKAR1A  
PRKAR2A  
PRKCB  
PRPF4B  
PRPSAP1  
PRR11  
PRR12  
PRR18  
PRRC2B  
PRRX2  
PSMA6  
PSME4  
PTMS  
PTOV1  
PTP4A3  
PTPN23  
PTPRB  
PVRL1  
PWWP2A

PXDN  
PXMP2  
PYROXD1  
QKI  
R3HCC1  
R3HCC1L  
RAB11FIP3  
RAB2A  
RAB2B  
RAB31  
RAB3IP  
RAB43  
RAB4A  
RAB8A  
RAD23A  
RAF1  
RAI14  
RAP1GDS1  
RAPGEF1  
RASIP1  
RASSF1  
RASSF3  
RB1CC1  
RBBP7  
RBM20  
RBM28  
RBM4  
RBM44  
RBM8A  
RBMS1  
RCHY1  
RCN3  
REPS1  
RFT1  
RGL1  
RGS12  
RGS6  
RHBDF1  
RHOB  
RHOBTB2  
RIMBP2  
RMND5B  
RNF138  
RNF14  
RNF141  
RNF25  
RPA2

RPS12  
RPS15  
RPS25  
RPS6KA3  
RPS9  
RRAS  
RRAS2  
RSBN1L  
RWDD1  
RXRB  
RYS3  
SAR1A  
SBNO2  
SCAF1  
SCAF11  
SCAMP3  
SCO2  
SCPEP1  
SDCCAG3  
SEC14L1  
SEPT1  
SERAC1  
SETD3  
SETD5  
SETD8  
SF3A1  
SFXN4  
SGSM2  
SH2D2A  
SH3TC2  
SHMT2  
SHOC2  
SIGLEC15  
SIK3  
SIPA1L1  
SIX5  
SKIL  
SLAIN2  
SLC12A2  
SLC13A4  
SLC1A3  
SLC1A6  
SLC24A3  
SLC24A4  
SLC25A25  
SLC25A3  
SLC25A34

SLC25A37  
SLC30A9  
SLC35B4  
SLC35E1  
SLC36A4  
SLC37A3  
SLC38A10  
SLC39A1  
SLC39A10  
SLC39A7  
SLC52A2  
SLC5A11  
SLC7A7  
SLFN14  
SLTM  
SMAD6  
SMARCA5  
SMARCD2  
SMIM19  
SNRPA  
SOAT1  
SOCS3  
SOCS5  
SOX13  
SOX9  
SPATA24  
SPATA5  
SPDYA  
SPHKAP  
SPOCD1  
SPPL2A  
SPRYD3  
SRA1  
SREBF2  
ST3GAL5  
STAP2  
STAT3  
STAT5A  
STIM2  
STK24  
STK3  
STRBP  
STRN4  
STUB1  
SUPT3H  
SZT2  
TACC3



TANC2  
TAOK1  
TBCCD1  
TBX18  
TCEANC2  
TCFL5  
TCHP  
TCTA  
TEAD1  
TECRL  
TESK1  
TEX261  
TFEB  
TGFB2  
TGFBR1  
TGFBRAP1  
THAP11  
THAP3  
THAP7  
THBS1  
THBS4  
THOC7  
THUMPD1  
THYN1  
TIGD4  
TK1  
TLDC1  
TLE3  
TM2D2  
TM4SF19  
TM6SF1  
TM9SF1  
TM9SF3  
TMA7  
TMBIM1  
TMBIM4  
TMC2  
TMCO1  
TMED1  
TMED2  
TMED7  
TMEM101  
TMEM108  
TMEM115  
TMEM123  
TMEM127  
TMEM129

TMEM138  
TMEM147  
TMEM150A  
TMEM161B  
TMEM163  
TMEM165  
TMEM167A  
TMEM168  
TMEM17  
TMEM170A  
TMEM170B  
TMEM178B  
TMEM186  
TMEM19  
TMEM194B  
TMEM2  
TMEM200B  
TMEM206  
TMEM215  
TMEM234  
TMEM242  
TMEM258  
TMEM261  
TMEM30A  
TMEM38A  
TMEM38B  
TMEM55A  
TMEM63B  
TMEM64  
TMEM65  
TMEM66  
TMEM71  
TMEM86A  
TMEM87A  
TMEM88  
TMEM98  
TMEM9B  
TMF1  
TMLHE  
TMOD1  
TMPO  
TMTC3  
TMX3  
TMX4  
TNFSF11  
TNIK  
TNIP2

TNKS  
TNNI3  
TNNI3K  
TOM1L1  
TP53  
TP53BP2  
TP53INP2  
TPCN1  
TPX2  
TRAK2  
TREML2  
TRIB2  
TRIM5  
TRIM55  
TRIM62  
TRIM63  
TRIM68  
TRIM8  
TRIP10  
TRMT2A  
TSC22D1  
TSC22D4  
TSPAN12  
TSPAN13  
TSPAN9  
TTC23  
TTI1  
TTK  
TULP1  
TWIST1  
TWISTNB  
U2AF2  
U2SURP  
UBE2D1  
UBE2J2  
UBE2R2  
UBE4A  
UBFD1  
UBL3  
UBN2  
UBOX5  
UBR4  
UBXN2A  
UGP2  
UNC119  
UPF3A  
UPK3B

URB1  
UTP20  
VASH1  
VCL  
VCPKMT  
VOPP1  
WASH1  
WBP1L  
WDR13  
WDR41  
WDR82  
WDR91  
WDSUB1  
WHSC1L1  
WIPF2  
WNK1  
WTIP  
WWC2  
XIRP1  
XK  
XKR4  
YEATS4  
ZBED3  
ZBTB24  
ZBTB40  
ZBTB45  
ZBTB6  
ZC4H2  
ZCWPW2  
ZEB1  
ZFP36L1  
ZFP36L2  
ZFX  
ZFYVE20  
ZMAT5  
ZMYM4  
ZNF22  
ZNF260  
ZNF275  
ZNF563  
ZNF579  
ZNF768  
ZNF799  
ZSCAN22
