# Supplementary material for: De Novo and Rare Variants at Multiple Loci Support the Oligogenic Origins of Atrioventricular Septal Heart Defects
Source: PubMed Central journal article supplement (PMC4825975; doi:10.1371/journal.pgen.1005963), 2016-04-08
Supplement: pgen.1005963.s014.pdf [file pgen.1005963.s014.pdf]

**Table S7. Rare Variant Inheritance Patterns Identify Genes Associated with Cardiac Malformations by Prior Clinical or Experimental Evidence**

| Prior Evidence                | Proband | Gene   | Inheritance           | Residual Variation Intolerance Score | Exonic Function      | Amino Acid Change                | Minor Allele Frequency EXAC | dbSNP138    | PolyPhen2 Score | PolyPhen2 Prediction | GERP Score | Chromosome | Position  | Ref | Alt | Quality Score | Paternal Genotype | Maternal Genotype | Proband Genotype |
|-------------------------------|---------|--------|-----------------------|--------------------------------------|----------------------|----------------------------------|-----------------------------|-------------|-----------------|----------------------|------------|------------|-----------|-----|-----|---------------|-------------------|-------------------|------------------|
| Mouse KO Phenotype            | 3721    | ADAM17 | compound heterozygous | 82.78                                | nonsynonymous SNV    | uc010ewz.3:c.T290G;p.L97R        | .                           | .           | 0.003           | B                    | 1.61       | chr2       | 9630520   | A   | C   | 2144.5        | 0/0               | 0/1               | 0/1              |
| Mouse KO Phenotype            | 3721    | ADAM17 | compound heterozygous | 82.78                                | nonsynonymous SNV    | uc010ewz.3:c.C269T;p.S90L        | 0.01                        | rs55796712  | 0.003           | B                    | 1.66       | chr2       | 9630541   | G   | A   | 2781.7        | 0/1               | 0/0               | 1/0              |
| Mouse KO Phenotype            | 1131    | RYR1   | compound heterozygous | 0.01                                 | nonsynonymous SNV    | uc002oit.3:c.A89T;p.E30V         | 2.37E-04                    | rs145771708 | 0.158           | P                    | 4.41       | chr19      | 38931428  | A   | T   | 602.1         | 0/1               | 0/0               | 1/0              |
| Mouse KO Phenotype            | 1131    | RYR1   | compound heterozygous | 0.01                                 | nonsynonymous SNV    | uc002oiu.3:c.G13498C;p.D4500H    | 3.31E-03                    | rs150396398 | 0.456933        | .                    | 3.76       | chr19      | 39057626  | G   | C   | 1248.1        | 0/0               | 0/1               | 0/1              |
| Mouse KO Phenotype            | 7952    | CHRD   | compound heterozygous | 15.36                                | nonsynonymous SNV    | uc011brr.2:c.C476T;p.A159V       | 5.29E-04                    | rs150401834 | 0.251           | P                    | 5.28       | chr3       | 184102470 | C   | T   | 765.7         | 0/0               | 0/1               | 0/1              |
| Mouse KO Phenotype            | 7952    | CHRD   | compound heterozygous | 15.36                                | nonsynonymous SNV    | uc011brr.2:c.C1085T;p.T362I      | 2.36E-04                    | rs138569844 | 0.992           | D                    | 3.88       | chr3       | 184105726 | C   | T   | 479.8         | 0/1               | 0/0               | 1/0              |
| Mouse KO Phenotype            | 3731    | PTPRJ  | compound heterozygous | 86.42                                | nonsynonymous SNV    | uc001fngp.4:c.G1114A;p.V372I     | 8.80E-03                    | rs2229703   | 0.014           | B                    | -10.8      | chr11      | 48149352  | G   | A   | 632.1         | 0/0               | 0/1               | 0/1              |
| Mouse KO Phenotype            | 3731    | PTPRJ  | compound heterozygous | 86.42                                | nonsynonymous SNV    | uc010fhr.1:c.G517A;p.E173K       | 4.07E-04                    | rs181029182 | 0.881           | D                    | 0.0462     | chr11      | 48161067  | G   | A   | 1410          | 0/1               | 0/0               | 1/0              |
| Mouse KO Phenotype            | 8522    | IFT140 | compound heterozygous | 22.82                                | nonsynonymous SNV    | uc002ciz.3:c.G3193A;p.E1065K     | 4.07E-05                    | rs142106374 | 0.615491        | .                    | 3.85       | chr16      | 1560980   | C   | T   | 732.4         | 0/0               | 0/1               | 0/1              |
| Mouse KO Phenotype            | 8522    | IFT140 | compound heterozygous | 22.82                                | nonsynonymous SNV    | uc002cmb.3:c.G322A;p.V108M       | 6.86E-03                    | rs146128830 | 0.03            | B                    | -1.38      | chr16      | 1652418   | C   | T   | 1146.8        | 0/1               | 0/0               | 1/0              |
| Mouse KO Phenotype            | 28      | ATE1   | homozygous rare       | 22.51                                | nonsynonymous SNV    | uc010qts.2:c.C211T;p.L71F        | 0.01                        | rs148095496 | 0.001           | B                    | 1.57       | chr10      | 123670505 | G   | A   | 2325.6        | 0/1               | 0/1               | 1/1              |
| Clinical Association with CHD | 2933    | NOTCH1 | compound heterozygous | 0.33                                 | nonsynonymous SNV    | uc004chz.3:c.G6853A;p.V2285I     | 0.02                        | rs61751489  | 0               | B                    | 1.38       | chr9       | 139391338 | C   | T   | 621.8         | 0/1               | 0/0               | 1/0              |
| Clinical Association with CHD | 2033    | NOTCH1 | compound heterozygous | 0.33                                 | nonsynonymous SNV    | uc004cia.1:c.G1526A;p.R509H      | 0.01                        | rs61751543  | 0.874           | D                    | 3.49       | chr9       | 139401233 | C   | T   | 541.2         | 0/0               | 0/1               | 0/1              |
| Clinical Association with CHD | 155     | NSD1   | compound heterozygous | 3.24                                 | nonsynonymous SNV    | uc003mfs.1:c.G2797C;p.A933P      | 0.02                        | rs28932179  | 0.004           | B                    | -8.89      | chr5       | 176638506 | G   | C   | 1166.6        | 0/0               | 0/1               | 0/1              |
| Clinical Association with CHD | 155     | NSD1   | compound heterozygous | 3.24                                 | nonsynonymous SNV    | uc021yjp.1:c.A1083T;p.R361S      | 1.63E-05                    | rs377546578 | 0.405           | P                    | 3.13       | chr5       | 176721980 | A   | T   | 236.5         | 0/1               | 0/0               | 1/0              |
| Clinical Association with CHD | 2020    | ZFPM2  | compound heterozygous | 80.37                                | nonsynonymous SNV    | uc003ymd.3:c.A89G;p.E30G         | 2.68E-03                    | rs121908601 | .               | .                    | .          | chr8       | 106431420 | A   | G   | 2960.2        | 0/0               | 0/1               | 0/1              |
| Clinical Association with CHD | 2020    | ZFPM2  | compound heterozygous | 80.37                                | nonsynonymous SNV    | uc011lfs.2:c.A1162G;p.S388G      | 0.01                        | rs28374544  | .               | .                    | .          | chr8       | 106814279 | A   | G   | 1679.3        | 0/1               | 0/0               | 1/0              |
| Clinical Association with CHD | 2023    | MYH6   | compound heterozygous | 0.66                                 | nonsynonymous SNV    | uc001wvj.3:c.C2807T;p.A936V      | 4.45E-04                    | rs199838024 | 0.937           | D                    | 4.7        | chr14      | 23862996  | G   | A   | 1709.8        | 0/1               | 0/0               | 1/0              |
| Clinical Association with CHD | 2023    | MYH6   | compound heterozygous | 0.66                                 | nonsynonymous SNV    | uc001wvj.3:c.G622A;p.D208N       | 5.49E-03                    | rs142027794 | 0               | B                    | 3.17       | chr14      | 23873940  | C   | T   | 2503.7        | 0/0               | 0/1               | 0/1              |
| Clinical Association with CHD | 54      | VCAN   | compound heterozygous | 19.96                                | nonsynonymous SNV    | uc003kil.3:c.G241A;p.V81I        | 8.13E-06                    | .           | 0.877           | D                    | 3.44       | chr5       | 82833071  | G   | A   | 830.1         | 0/1               | 0/0               | 1/0              |
| Clinical Association with CHD | 54      | VCAN   | compound heterozygous | 19.96                                | nonsynonymous SNV    | uc003kil.3:c.A596G;p.E199G       | 3.00E-03                    | rs61749614  | 0.01            | B                    | 1.67       | chr5       | 82833426  | A   | G   | 399.5         | 0/0               | 0/1               | 0/1              |
| Clinical Association with CHD | 54      | MYH6   | homozygous rare       | 0.66                                 | nonsynonymous SNV    | uc001wvj.3:c.G3883C;p.E1295Q     | 3.21E-03                    | rs34935550  | 0.738           | P                    | 4.58       | chr14      | 23858697  | C   | G   | 2365.8        | 0/1               | 0/1               | 1/1              |
| CHD Associated Syndrome       | 7952    | SRCAP  | compound heterozygous | 0.15                                 | nonsynonymous SNV    | uc002dzz.1:c.G1130A;p.S377N      | 8.05E-04                    | rs139339184 | 0.508889        | .                    | 3.72       | chr16      | 30723222  | G   | A   | 1361.6        | 0/0               | 0/1               | 0/1              |
| CHD Associated Syndrome       | 7952    | SRCAP  | compound heterozygous | 0.15                                 | nonsynonymous SNV    | uc002dzz.1:c.A5090G;p.E1697G     | 4.02E-03                    | rs117480926 | 0.562115        | .                    | 5.35       | chr16      | 30740333  | A   | G   | 1082.9        | 0/1               | 0/0               | 1/0              |
| CHD Associated Syndrome       | 2002    | MLL2   | compound heterozygous | 0.06                                 | nonsynonymous SNV    | uc001rfa.4:c.G1955A;p.R652H      | 3.26E-05                    | .           | .               | .                    | .          | chr12      | 49445511  | C   | T   | 222.5         | 0/1               | 0/0               | 1/0              |
| CHD Associated Syndrome       | 2002    | MLL2   | compound heterozygous | 0.06                                 | nonsynonymous SNV    | uc001rfa.4:c.G248A;p.R83Q        | 0.02                        | rs55865069  | .               | .                    | .          | chr12      | 49448463  | C   | T   | 656.4         | 0/0               | 0/1               | 0/1              |
| CHD Associated Syndrome       | 155     | NOTCH2 | compound heterozygous | 2.15                                 | nonsynonymous SNV    | uc001eik.3:c.T7223A;p.L2408H     | 1.77E-03                    | rs35586704  | 0.688           | P                    | 5          | chr1       | 120458122 | A   | T   | 1173.5        | 0/0               | 0/1               | 0/1              |
| CHD Associated Syndrome       | 155     | NOTCH2 | compound heterozygous | 2.15                                 | nonsynonymous SNV    | uc001eik.3:c.A3980G;p.D1327G     | 0.01                        | rs61752484  | 0.067           | B                    | 5.47       | chr1       | 120469147 | T   | C   | 1652.1        | 0/1               | 0/0               | 1/0              |
| CHD Associated Syndrome       | 135     | BBS2   | compound heterozygous | 11.36                                | nonsynonymous SNV    | uc002ejd.2:c.G2062A;p.G688R      | .                           | rs376063241 | 0.996           | D                    | 5.14       | chr16      | 56518777  | C   | T   | 535.6         | 0/0               | 0/1               | 0/1              |
| CHD Associated Syndrome       | 135     | BBS2   | compound heterozygous | 11.36                                | frameshift insertion | uc002ejd.2:c.185_186insC;p.L62fs | .                           | .           | .               | .                    | .          | chr16      | 56548525  | A   | AG  | 614.6         | 0/1               | 0/0               | 1/0              |
| CHD Associated Syndrome       | 3731    | BBS2   | compound heterozygous | 11.36                                | nonsynonymous SNV    | uc002ejd.2:c.C1511T;p.A504V      | 6.12E-03                    | rs16957538  | 0               | B                    | 2.91       | chr16      | 56533706  | G   | A   | 1455.9        | 0/0               | 0/1               | 0/1              |
| CHD Associated Syndrome       | 3731    | BBS2   | compound heterozygous | 11.36                                | nonsynonymous SNV    | uc002ejd.2:c.A691G;p.K231E       | 1.63E-05                    | .           | 0.168           | P                    | 4.29       | chr16      | 56540058  | T   | C   | 2175.3        | 0/1               | 0/0               | 1/0              |
| CHD Associated Syndrome       | 2028    | EHMT1  | deNovo                | 3.13                                 | nonsynonymous SNV    | uc004cob.1:c.G779A;p.R260Q       | .                           | .           | 0.999           | D                    | 5.07       | chr9       | 140637871 | G   | A   | 1671.7        | 0/0               | 0/0               | 0/1              |
