# Supplementary material for: De Novo and Rare Variants at Multiple Loci Support the Oligogenic Origins of Atrioventricular Septal Heart Defects
Source: PubMed Central journal article supplement (PMC4825975; doi:10.1371/journal.pgen.1005963), 2016-04-08
Supplement: pgen.1005963.s015.pdf [file pgen.1005963.s015.pdf]

| Gene      | Atrial Expression | P-value Atrial | AV-Canal Expression | P-value AV-Canal | Branchial Arches Expression | P-value Branchial Arches | Heart Tube Expression | P-value Heart Tube | Outflow Tract Expression | P-value Outflow Tract | Ventricle Expression | P-value Ventricle | DMP Expression |
|-----------|-------------------|----------------|---------------------|------------------|-----------------------------|--------------------------|-----------------------|--------------------|--------------------------|-----------------------|----------------------|-------------------|----------------|
| ANXA8     | .                 | .              | .                   | .                | 0.5198948                   | 2.06E-06                 | .                     | .                  | .                        | .                     | .                    | .                 | .              |
| AOX1      | .                 | .              | .                   | .                | .                           | .                        | .                     | 0.5509519          | 3.65E-07                 | .                     | .                    | .                 | .              |
| AP1G1     | .                 | .              | .                   | .                | .                           | .                        | .                     | .                  | .                        | .                     | .                    | .                 | yes            |
| AP1S2     | .                 | .              | .                   | .                | .                           | .                        | .                     | 0.6304566          | 1.75E-09                 | .                     | .                    | .                 | .              |
| AP2A1     | .                 | .              | .                   | .                | .                           | .                        | .                     | 0.5755808          | 8.11E-08                 | .                     | .                    | .                 | .              |
| AP2A2     | .                 | .              | .                   | .                | .                           | .                        | .                     | 0.5231232          | 1.74E-06                 | .                     | .                    | .                 | yes            |
| AP2B1     | .                 | .              | 0.3856024           | 0.0006917        | .                           | .                        | .                     | 0.3627604          | 0.0014911                | .                     | .                    | .                 | yes            |
| AP2M1     | .                 | .              | 0.3058334           | 0.0080514        | .                           | .                        | .                     | 0.5540625          | 3.04E-07                 | .                     | .                    | .                 | .              |
| AP3S2     | .                 | .              | .                   | .                | .                           | .                        | .                     | 0.5971295          | 1.96E-08                 | .                     | .                    | .                 | .              |
| AP4B1     | .                 | .              | .                   | .                | .                           | .                        | .                     | 0.6818703          | 2.26E-11                 | .                     | .                    | .                 | .              |
| AP4M1     | .                 | .              | .                   | .                | .                           | .                        | .                     | 0.4498771          | 5.79E-05                 | .                     | .                    | .                 | .              |
| AP5M1     | .                 | .              | 0.4228619           | 0.0001745        | .                           | .                        | .                     | .                  | .                        | .                     | .                    | .                 | .              |
| APBB3     | .                 | .              | .                   | .                | .                           | .                        | .                     | 0.8176531          | 6.18E-19                 | .                     | .                    | .                 | .              |
| API5      | .                 | .              | 0.304364            | 0.0083758        | .                           | .                        | .                     | .                  | .                        | .                     | .                    | .                 | yes            |
| APLP2     | .                 | .              | .                   | .                | .                           | .                        | .                     | .                  | .                        | .                     | .                    | .                 | yes            |
| APOBEC2   | .                 | .              | 0.371223            | 0.0011291        | .                           | .                        | .                     | 0.6059198          | 1.06E-08                 | .                     | .                    | .                 | .              |
| APOL2     | .                 | .              | .                   | .                | .                           | .                        | .                     | .                  | .                        | 0.7004016             | 3.77E-12             | .                 | .              |
| APP       | .                 | .              | 0.4656247           | 2.91E-05         | .                           | .                        | .                     | .                  | .                        | .                     | .                    | .                 | yes            |
| APPBP2    | .                 | .              | 0.3832262           | 0.0007512        | .                           | .                        | .                     | 0.3034976          | 0.0085724                | .                     | .                    | .                 | .              |
| AQPEP     | .                 | .              | .                   | .                | .                           | .                        | .                     | .                  | .                        | 0.6233326             | 3.00E-09             | .                 | .              |
| ARCN1     | .                 | .              | 0.4239242           | 0.0001674        | .                           | .                        | .                     | .                  | .                        | .                     | .                    | .                 | yes            |
| ARF3      | .                 | .              | 0.4011574           | 0.0003969        | .                           | .                        | .                     | 0.4474078          | 6.43E-05                 | .                     | .                    | .                 | yes            |
| ARF4      | .                 | .              | 0.3829508           | 0.0007584        | .                           | .                        | .                     | 0.3229998          | 0.005002                 | .                     | .                    | .                 | yes            |
| ARFGEF1   | .                 | .              | .                   | .                | .                           | .                        | .                     | 0.4999935          | 5.74E-06                 | .                     | .                    | .                 | .              |
| ARFGEF2   | .                 | .              | .                   | .                | .                           | .                        | .                     | 0.5968985          | 1.99E-08                 | .                     | .                    | .                 | .              |
| ARFIP2    | .                 | .              | .                   | .                | 0.4716403                   | 2.22E-05                 | .                     | .                  | .                        | .                     | .                    | .                 | .              |
| ARG1      | .                 | .              | .                   | .                | .                           | .                        | .                     | .                  | .                        | .                     | .                    | .                 | yes            |
| ARHGAP1   | .                 | .              | 0.5885073           | 3.50E-08         | .                           | .                        | .                     | .                  | .                        | .                     | .                    | .                 | .              |
| ARHGAP28  | .                 | .              | .                   | .                | 0.4803116                   | 1.49E-05                 | .                     | .                  | .                        | .                     | .                    | .                 | yes            |
| ARHGAP29  | .                 | .              | 0.5167883           | 2.43E-06         | .                           | .                        | .                     | .                  | .                        | .                     | .                    | .                 | .              |
| ARHGAP31  | .                 | .              | 0.5646834           | 1.60E-07         | .                           | .                        | .                     | .                  | .                        | .                     | .                    | .                 | .              |
| ARHGAP35  | .                 | .              | .                   | .                | .                           | .                        | .                     | 0.4595253          | 3.81E-05                 | .                     | .                    | .                 | yes            |
| ARHGAP40  | .                 | .              | .                   | .                | .                           | .                        | .                     | .                  | .                        | 0.5515258             | 3.53E-07             | .                 | .              |
| ARHGAP44  | .                 | .              | .                   | .                | .                           | .                        | .                     | .                  | .                        | 0.5272564             | 1.39E-06             | .                 | .              |
| ARHGDI1   | .                 | .              | .                   | .                | .                           | .                        | .                     | 0.6423991          | 6.85E-10                 | .                     | .                    | .                 | yes            |
| ARHGDI10L | 0.4582224         | 4.04E-05       | .                   | .                | .                           | .                        | .                     | .                  | .                        | .                     | .                    | .                 | .              |
| ARHGDI12  | .                 | .              | 0.4009294           | 0.0004002        | .                           | .                        | .                     | 0.4631047          | 3.26E-05                 | .                     | .                    | .                 | .              |
| ARHGDI17  | .                 | .              | .                   | .                | .                           | .                        | .                     | 0.4504889          | 5.64E-05                 | .                     | .                    | .                 | yes            |
| ARHGDI2   | .                 | .              | .                   | .                | .                           | .                        | .                     | 0.4410577          | 8.38E-05                 | .                     | .                    | .                 | .              |
| ARHGDI3A  | .                 | .              | .                   | .                | .                           | .                        | .                     | 0.3491214          | 0.0022986                | .                     | .                    | .                 | yes            |
| ARHGDI4   | .                 | .              | .                   | .                | .                           | .                        | .                     | .                  | .                        | .                     | .                    | .                 | yes            |
| ARHGDI5   | .                 | .              | .                   | .                | .                           | .                        | .                     | 0.532725           | 1.03E-06                 | .                     | .                    | .                 | .              |
| ARHGDI6   | .                 | .              | .                   | .                | .                           | .                        | .                     | .                  | .                        | .                     | .                    | .                 | yes            |
| ARHGDI7   | .                 | .              | 0.3230629           | 0.004993         | .                           | .                        | .                     | .                  | .                        | .                     | .                    | .                 | yes            |
| ARHGDI8   | .                 | .              | 0.484132            | 1.24E-05         | .                           | .                        | .                     | .                  | .                        | .                     | .                    | .                 | .              |
| ARHGDI9   | .                 | .              | .                   | .                | .                           | .                        | .                     | 0.5266442          | 1.44E-06                 | .                     | .                    | .                 | .              |
| ARHGDI10  | .                 | .              | 0.3799275           | 0.0008416        | .                           | .                        | .                     | .                  | .                        | .                     | .                    | .                 | .              |
| ARHGDI11  | .                 | .              | .                   | .                | .                           | .                        | .                     | .                  | .                        | .                     | .                    | .                 | yes            |
| ARHGDI12  | .                 | .              | 0.4033799           | 0.0003658        | .                           | .                        | .                     | 0.3608965          | 0.0015838                | .                     | .                    | .                 | .              |
| ARHGDI13  | .                 | .              | .                   | .                | .                           | .                        | .                     | 0.5084453          | 3.75E-06                 | .                     | .                    | .                 | .              |
| ARHGDI14  | .                 | .              | .                   | .                | .                           | .                        | .                     | 0.641925           | 7.11E-10                 | .                     | .                    | .                 | .              |
| ARHGDI15  | .                 | .              | .                   | .                | .                           | .                        | .                     | 0.6394362          | 8.67E-10                 | .                     | .                    | .                 | .              |
| ARHGDI16  | .                 | .              | .                   | .                | .                           | .                        | .                     | 0.6922022          | 8.46E-12                 | .                     | .                    | .                 | .              |
| ARHGDI17  | .                 | .              | 0.3798428           | 0.000844         | .                           | .                        | .                     | .                  | .                        | .                     | .                    | .                 | yes            |
| ARHGDI18  | .                 | .              | 0.3886265           | 0.0006222        | .                           | .                        | .                     | 0.6511819          | 3.35E-10                 | .                     | .                    | .                 | .              |
| ARHGDI19  | .                 | .              | .                   | .                | .                           | .                        | .                     | 0.4516112          | 5.37E-05                 | .                     | .                    | .                 | .              |
| ARHGDI20  | .                 | .              | 0.5308613           | 1.14E-06         | .                           | .                        | .                     | 0.4527694          | 5.11E-05                 | .                     | .                    | .                 | yes            |
| ARHGDI21  | .                 | .              | .                   | .                | .                           | .                        | .                     | 0.6178504          | 4.51E-09                 | .                     | .                    | .                 | .              |
| ARHGDI22  | .                 | .              | .                   | .                | .                           | .                        | .                     | 0.6258804          | 2.48E-09                 | .                     | .                    | .                 | .              |
| ARHGDI23  | .                 | .              | .                   | .                | .                           | .                        | .                     | 0.5748337          | 8.50E-08                 | .                     | .                    | .                 | .              |
| ARHGDI24  | .                 | .              | .                   | .                | .                           | .                        | .                     | .                  | .                        | .                     | .                    | .                 | yes            |
| ARHGDI25  | .                 | .              | 0.4127017           | 0.0002581        | .                           | .                        | .                     | .                  | .                        | .                     | .                    | .                 | .              |
| ARHGDI26  | .                 | .              | .                   | .                | .                           | .                        | .                     | 0.4569327          | 4.27E-05                 | .                     | .                    | .                 | .              |
| ARHGDI27  | .                 | .              | .                   | .                | .                           | .                        | .                     | 0.6418797          | 7.14E-10                 | .                     | .                    | .                 | .              |
| ARHGDI28  | .                 | .              | .                   | .                | .                           | .                        | .                     | .                  | .                        | 0.6669659             | 8.70E-11             | .                 | .              |
| ARHGDI29  | .                 | .              | 0.435106            | 0.000107         | .                           | .                        | .                     | .                  | .                        | .                     | .                    | .                 | .              |
| ARHGDI30  | .                 | .              | .                   | .                | 0.4528522                   | 5.10E-05                 | .                     | .                  | .                        | .                     | .                    | .                 | .              |
| ARHGDI31  | .                 | .              | .                   | .                | .                           | .                        | .                     | 0.6504802          | 3.55E-10                 | .                     | .                    | .                 | .              |
| ARHGDI32  | .                 | .              | .                   | .                | .                           | .                        | 0.3010636             | 0.0091465          | 0.5083101                | 3.77E-06              | .                    | .                 | yes            |
| ARHGDI33  | .                 | .              | .                   | .                | .                           | .                        | .                     | 0.5305908          | 1.16E-06                 | .                     | .                    | .                 | .              |
| ARHGDI34  | .                 | .              | .                   | .                | .                           | .                        | .                     | .                  | .                        | 0.4990471             | 6.02E-06             | .                 | .              |
| ARHGDI35  | .                 | .              | .                   | .                | .                           | .                        | 0.3605635             | 0.0016008          | 0.5398979                | 6.90E-07              | .                    | .                 | .              |
| ARHGDI36  | .                 | .              | .                   | .                | .                           | .                        | .                     | 0.8351468          | 2.27E-20                 | .                     | .                    | .                 | .              |
| ARHGDI37  | .                 | .              | .                   | .                | 0.4616699                   | 3.47E-05                 | .                     | .                  | .                        | .                     | .                    | .                 | .              |
| ARHGDI38  | .                 | .              | .                   | .                | .                           | .                        | 0.5015044             | 5.32E-06           | .                        | .                     | .                    | .                 | .              |



| Gene           | Atrial Expression | P-value Atrial | AV-Canal Expression | P-value AV-Canal | Branchial Arches Expression | P-value Branchial Arches | Heart Tube Expression | P-value Heart Tube | Outflow Tract Expression | P-value Outflow Tract | Ventricle Expression | P-value Ventricle | DMP Expression |
|----------------|-------------------|----------------|---------------------|------------------|-----------------------------|--------------------------|-----------------------|--------------------|--------------------------|-----------------------|----------------------|-------------------|----------------|
| BCKDK          | .                 | .              | 0.3146307           | 0.0063299        | .                           | .                        | .                     | .                  | 0.4647273                | 3.03E-05              | .                    | .                 | .              |
| BCL10          | .                 | .              | 0.4158404           | 0.000229         | .                           | .                        | .                     | .                  | 0.5684243                | 1.27E-07              | .                    | .                 | .              |
| BCL7A          | .                 | .              | .                   | .                | .                           | .                        | .                     | .                  | 0.4943917                | 7.57E-06              | .                    | .                 | .              |
| BCL9           | .                 | .              | .                   | .                | .                           | .                        | .                     | .                  | 0.3529551                | 0.0020392             | .                    | .                 | yes            |
| BCLAF1         | .                 | .              | .                   | .                | .                           | .                        | .                     | .                  | .                        | .                     | .                    | .                 | yes            |
| BCOR           | .                 | .              | .                   | .                | .                           | 0.2981216                | 0.0098849             | 0.4880233          | 1.03E-05                 | .                     | .                    | .                 | .              |
| BCORL1         | .                 | .              | 0.5839965           | 4.71E-08         | .                           | .                        | .                     | .                  | .                        | .                     | .                    | .                 | .              |
| BCR            | .                 | .              | .                   | .                | .                           | .                        | .                     | .                  | 0.5911152                | 2.94E-08              | .                    | .                 | .              |
| BECN1          | .                 | .              | .                   | .                | .                           | .                        | .                     | .                  | 0.4367819                | 1.00E-04              | .                    | .                 | .              |
| BEND4          | .                 | .              | 0.3631052           | 0.0014746        | .                           | .                        | .                     | .                  | 0.7263324                | 2.41E-13              | .                    | .                 | .              |
| BFSP1          | .                 | .              | 0.3823648           | 0.0007739        | .                           | .                        | .                     | .                  | .                        | .                     | .                    | .                 | .              |
| BHLHB9         | .                 | .              | .                   | .                | .                           | .                        | .                     | .                  | 0.5577449                | 2.44E-07              | .                    | .                 | .              |
| BICD2          | .                 | .              | .                   | .                | .                           | .                        | .                     | .                  | 0.5549787                | 2.88E-07              | .                    | .                 | .              |
| BID            | .                 | .              | .                   | .                | .                           | .                        | .                     | .                  | 0.322749                 | 0.0050379             | 0.4991653            | 5.98E-06          | .              |
| BIK            | .                 | .              | .                   | .                | .                           | .                        | .                     | .                  | 0.6646876                | 1.06E-10              | .                    | .                 | .              |
| BIRC6          | .                 | .              | .                   | .                | .                           | .                        | .                     | .                  | .                        | .                     | .                    | .                 | yes            |
| BLMH           | .                 | .              | .                   | .                | .                           | .                        | .                     | .                  | 0.3858381                | 0.0006861             | .                    | .                 | yes            |
| BLOC1S1        | .                 | .              | 0.4369775           | 9.92E-05         | .                           | .                        | .                     | .                  | .                        | .                     | .                    | .                 | .              |
| BLOC1S4        | .                 | .              | .                   | .                | .                           | .                        | .                     | .                  | 0.6591108                | 1.72E-10              | .                    | .                 | .              |
| BLOC1S6        | .                 | .              | .                   | .                | .                           | .                        | .                     | .                  | 0.4560526                | 4.44E-05              | .                    | .                 | .              |
| BMP4           | .                 | .              | .                   | .                | .                           | 0.3480129                | 0.0023789             | 0.4852898          | 1.17E-05                 | .                     | .                    | .                 | .              |
| BMP7           | .                 | .              | 0.4731951           | 2.07E-05         | .                           | .                        | .                     | .                  | 0.3868376                | 0.0006625             | .                    | .                 | .              |
| BMPER          | .                 | .              | 0.6101742           | 7.86E-09         | .                           | .                        | .                     | .                  | .                        | .                     | .                    | .                 | .              |
| BMPR1A         | .                 | .              | 0.3847677           | 0.0007121        | .                           | .                        | .                     | .                  | .                        | .                     | .                    | .                 | yes            |
| BMS1           | .                 | .              | .                   | .                | .                           | .                        | .                     | .                  | .                        | .                     | .                    | .                 | yes            |
| BNIP2          | .                 | .              | .                   | .                | 0.5357477                   | 8.71E-07                 | .                     | .                  | .                        | .                     | .                    | .                 | .              |
| BNIP3          | .                 | .              | 0.5653639           | 1.54E-07         | .                           | .                        | .                     | .                  | .                        | .                     | .                    | .                 | .              |
| BNIP3L         | .                 | .              | .                   | .                | .                           | .                        | .                     | .                  | 0.7023971                | 3.08E-12              | .                    | .                 | .              |
| BOD1           | .                 | .              | .                   | .                | .                           | .                        | .                     | .                  | 0.4789826                | 1.58E-05              | .                    | .                 | .              |
| BPIFB2         | .                 | .              | .                   | .                | 0.4377461                   | 9.61E-05                 | .                     | .                  | .                        | .                     | .                    | .                 | .              |
| BPTF           | .                 | .              | .                   | .                | .                           | .                        | .                     | .                  | .                        | .                     | .                    | .                 | yes            |
| BRAF           | .                 | .              | 0.3825238           | 0.0007697        | .                           | .                        | .                     | .                  | .                        | .                     | .                    | .                 | .              |
| BRCC3          | .                 | .              | .                   | .                | .                           | .                        | .                     | .                  | 0.5682106                | 1.29E-07              | .                    | .                 | .              |
| BRD2           | .                 | .              | .                   | .                | .                           | .                        | .                     | .                  | .                        | .                     | .                    | .                 | yes            |
| BRD3           | .                 | .              | .                   | .                | .                           | .                        | .                     | .                  | .                        | .                     | .                    | .                 | yes            |
| BRD4           | .                 | .              | 0.4003201           | 0.0004092        | .                           | .                        | .                     | .                  | .                        | .                     | .                    | .                 | yes            |
| BRD9           | .                 | .              | 0.5018982           | 5.22E-06         | .                           | .                        | .                     | .                  | .                        | .                     | .                    | .                 | .              |
| BRF2           | .                 | .              | 0.3251922           | 0.0046978        | .                           | .                        | .                     | .                  | 0.4686908                | 2.54E-05              | .                    | .                 | .              |
| BRI3           | .                 | .              | .                   | .                | .                           | .                        | .                     | .                  | 0.4466553                | 6.63E-05              | .                    | .                 | .              |
| BRI3BP         | .                 | .              | 0.4425761           | 7.87E-05         | .                           | .                        | .                     | .                  | 0.4183911                | 0.0002076             | .                    | .                 | .              |
| BRSK1          | .                 | .              | .                   | .                | .                           | .                        | .                     | .                  | 0.6664703                | 9.09E-11              | .                    | .                 | .              |
| BRWD3          | .                 | .              | .                   | .                | .                           | .                        | .                     | .                  | .                        | .                     | 0.4599469            | 3.74E-05          | .              |
| BSG            | .                 | .              | .                   | .                | .                           | .                        | .                     | .                  | 0.3432006                | 0.0027575             | .                    | .                 | yes            |
| BTAF1          | .                 | .              | .                   | .                | .                           | .                        | .                     | .                  | 0.4567686                | 4.30E-05              | .                    | .                 | .              |
| BTBD1          | .                 | .              | 0.3862718           | 0.0006758        | .                           | .                        | .                     | .                  | 0.3070284                | 0.0077958             | .                    | .                 | .              |
| BTBD6          | .                 | .              | .                   | .                | .                           | .                        | .                     | .                  | .                        | .                     | 0.4599604            | 3.74E-05          | .              |
| BTG4           | .                 | .              | .                   | .                | .                           | .                        | .                     | .                  | .                        | .                     | 0.6749837            | 4.25E-11          | .              |
| BTK            | .                 | .              | .                   | .                | .                           | .                        | .                     | .                  | 0.5921671                | 2.74E-08              | .                    | .                 | .              |
| BTN1A1         | .                 | .              | 0.4093999           | 0.0002924        | .                           | .                        | .                     | .                  | .                        | .                     | .                    | .                 | .              |
| BTNL10         | .                 | .              | .                   | .                | .                           | .                        | .                     | .                  | 0.4379381                | 9.53E-05              | .                    | .                 | .              |
| BTRC           | .                 | .              | 0.4363312           | 0.0001018        | .                           | .                        | .                     | .                  | .                        | .                     | .                    | .                 | .              |
| BUB1           | .                 | .              | 0.3725024           | 0.0010819        | .                           | .                        | .                     | .                  | .                        | .                     | .                    | .                 | yes            |
| BUB1B          | .                 | .              | 0.3070581           | 0.0077895        | 0.3226516                   | 0.0050519                | .                     | .                  | .                        | .                     | .                    | .                 | yes            |
| BUB3           | .                 | .              | .                   | .                | .                           | .                        | .                     | .                  | 0.4438373                | 7.47E-05              | .                    | .                 | yes            |
| BVES           | .                 | .              | 0.5879964           | 3.62E-08         | .                           | .                        | .                     | .                  | .                        | .                     | .                    | .                 | .              |
| BZW1           | .                 | .              | .                   | .                | .                           | .                        | .                     | .                  | .                        | .                     | .                    | .                 | yes            |
| BZW2           | .                 | .              | .                   | .                | .                           | .                        | .                     | .                  | .                        | .                     | .                    | .                 | yes            |
| C10orf118      | .                 | .              | 0.457534            | 4.16E-05         | .                           | .                        | .                     | .                  | .                        | .                     | .                    | .                 | .              |
| C11orf58       | .                 | .              | .                   | .                | .                           | .                        | .                     | .                  | 0.536534                 | 8.33E-07              | .                    | .                 | .              |
| C11orf86       | .                 | .              | .                   | .                | 0.5009653                   | 5.47E-06                 | .                     | .                  | .                        | .                     | .                    | .                 | .              |
| C12orf4        | .                 | .              | .                   | .                | .                           | .                        | .                     | .                  | 0.5224048                | 1.81E-06              | .                    | .                 | .              |
| C12orf5        | .                 | .              | .                   | .                | .                           | .                        | .                     | .                  | 0.764819                 | 2.17E-15              | .                    | .                 | .              |
| C12orf65       | .                 | .              | .                   | .                | .                           | .                        | .                     | .                  | 0.6142503                | 5.86E-09              | .                    | .                 | .              |
| C12orf68       | .                 | .              | .                   | .                | .                           | .                        | .                     | .                  | .                        | .                     | 0.6906305            | 9.85E-12          | .              |
| C14orf119      | .                 | .              | .                   | .                | .                           | .                        | .                     | .                  | 0.4860629                | 1.13E-05              | .                    | .                 | .              |
| C14orf142      | .                 | .              | .                   | .                | 0.5399547                   | 6.87E-07                 | .                     | .                  | .                        | .                     | .                    | .                 | .              |
| C14orf159      | .                 | .              | .                   | .                | .                           | .                        | .                     | .                  | .                        | .                     | 0.6365091            | 1.09E-09          | .              |
| C14orf169      | .                 | .              | 0.3939847           | 0.0005145        | .                           | .                        | .                     | .                  | 0.3446477                | 0.0026384             | .                    | .                 | .              |
| C14orf180      | .                 | .              | .                   | .                | .                           | .                        | .                     | .                  | .                        | .                     | 0.6127261            | 6.55E-09          | .              |
| C14orf2        | .                 | .              | 0.4267039           | 0.00015          | .                           | .                        | .                     | .                  | .                        | .                     | .                    | .                 | .              |
| C14orf37       | .                 | .              | .                   | .                | .                           | .                        | 0.4551483             | 4.61E-05           | 0.7962125                | 2.26E-17              | .                    | .                 | .              |
| C15orf38-AP3S2 | .                 | .              | .                   | .                | .                           | .                        | .                     | .                  | 0.5399439                | 6.88E-07              | .                    | .                 | .              |
| C16orf52       | .                 | .              | .                   | .                | .                           | .                        | .                     | .                  | 0.6631091                | 1.22E-10              | .                    | .                 | .              |
| C16orf59       | .                 | .              | .                   | .                | 0.5715739                   | 1.04E-07                 | .                     | .                  | .                        | .                     | .                    | .                 | .              |
| C16orf72       | .                 | .              | .                   | .                | .                           | .                        | .                     | .                  | 0.4396207                | 8.90E-05              | .                    | .                 | .              |

| Gene      | Atrial Expression | P-value Atrial | AV-Canal Expression | P-value AV-Canal | Branchial Arches Expression | P-value Branchial Arches | Heart Tube Expression | P-value Heart Tube | Outflow Tract Expression | P-value Outflow Tract | Ventricle Expression | P-value Ventricle | DMP Expression |
|-----------|-------------------|----------------|---------------------|------------------|-----------------------------|--------------------------|-----------------------|--------------------|--------------------------|-----------------------|----------------------|-------------------|----------------|
| C16orf74  | .                 | .              | .                   | .                | .                           | .                        | .                     | .                  | 0.6731376                | 5.02E-11              | .                    | .                 | .              |
| C16orf80  | .                 | .              | 0.3484269           | 0.0023486        | .                           | .                        | .                     | .                  | 0.4858084                | 1.15E-05              | .                    | .                 | .              |
| C16orf91  | .                 | .              | 0.3833144           | 0.000749         | .                           | .                        | .                     | .                  | .                        | .                     | .                    | .                 | .              |
| C17orf49  | .                 | .              | 0.4207129           | 0.0001897        | .                           | .                        | .                     | .                  | .                        | .                     | .                    | .                 | .              |
| C17orf59  | .                 | .              | 0.3383798           | 0.00319          | .                           | .                        | .                     | .                  | .                        | .                     | .                    | .                 | .              |
| C17orf96  | .                 | .              | .                   | .                | 0.6747911                   | 4.33E-11                 | .                     | .                  | 0.567434                 | 1.35E-07              | .                    | .                 | .              |
| C19orf66  | .                 | .              | .                   | .                | 0.4474298                   | 6.42E-05                 | .                     | .                  | 0.3069132                | 0.0078201             | .                    | .                 | .              |
| C19orf68  | .                 | .              | .                   | .                | .                           | .                        | .                     | .                  | 0.5610289                | 2.00E-07              | .                    | .                 | .              |
| C1GALT1   | .                 | .              | .                   | .                | .                           | .                        | .                     | .                  | 0.6543551                | 2.57E-10              | .                    | .                 | .              |
| C1orf106  | .                 | .              | .                   | .                | .                           | .                        | .                     | .                  | 0.605643                 | 1.08E-08              | .                    | .                 | .              |
| C1orf109  | .                 | .              | .                   | .                | .                           | .                        | .                     | .                  | 0.4961923                | 6.93E-06              | .                    | .                 | .              |
| C1orf111  | 0.5863359         | 4.04E-08       | .                   | .                | .                           | .                        | .                     | .                  | .                        | .                     | .                    | .                 | .              |
| C1orf174  | .                 | .              | .                   | .                | .                           | .                        | .                     | .                  | 0.4901904                | 9.29E-06              | .                    | .                 | .              |
| C1orf198  | .                 | .              | 0.4153687           | 0.0002332        | .                           | .                        | .                     | .                  | 0.4407132                | 8.50E-05              | .                    | .                 | .              |
| C1orf21   | .                 | .              | .                   | .                | .                           | .                        | .                     | .                  | 0.4822302                | 1.36E-05              | .                    | .                 | .              |
| C1orf227  | .                 | .              | 0.3970575           | 0.0004607        | .                           | .                        | .                     | .                  | .                        | .                     | .                    | .                 | .              |
| C1orf43   | .                 | .              | .                   | .                | .                           | .                        | .                     | .                  | 0.6504828                | 3.55E-10              | .                    | .                 | .              |
| C1orf86   | .                 | .              | .                   | .                | 0.5359466                   | 8.61E-07                 | .                     | .                  | .                        | .                     | .                    | .                 | .              |
| C1QBP     | .                 | .              | .                   | .                | .                           | .                        | 0.4313607             | 0.0001245          | .                        | .                     | .                    | .                 | yes            |
| C20orf194 | .                 | .              | 0.3945207           | 0.0005047        | .                           | .                        | .                     | .                  | .                        | .                     | .                    | .                 | .              |
| C21orf59  | .                 | .              | 0.3031871           | 0.0086438        | .                           | .                        | .                     | .                  | 0.5853455                | 4.31E-08              | .                    | .                 | .              |
| C2CD5     | .                 | .              | .                   | .                | .                           | .                        | .                     | .                  | .                        | .                     | 0.7000136            | 3.91E-12          | .              |
| C2orf43   | .                 | .              | .                   | .                | .                           | .                        | .                     | .                  | 0.6320838                | 1.54E-09              | .                    | .                 | .              |
| C3orf80   | .                 | .              | 0.4799585           | 1.51E-05         | .                           | .                        | .                     | .                  | .                        | .                     | .                    | .                 | .              |
| C4orf17   | .                 | .              | .                   | .                | .                           | .                        | .                     | .                  | .                        | .                     | 0.4628865            | 3.29E-05          | .              |
| C4orf46   | .                 | .              | .                   | .                | .                           | .                        | .                     | .                  | 0.5836283                | 4.83E-08              | .                    | .                 | .              |
| C5AR2     | .                 | .              | .                   | .                | .                           | .                        | .                     | .                  | 0.7111131                | 1.25E-12              | .                    | .                 | .              |
| C5orf15   | .                 | .              | 0.4688893           | 2.51E-05         | .                           | .                        | .                     | .                  | 0.6044517                | 1.18E-08              | .                    | .                 | yes            |
| C5orf24   | .                 | .              | 0.38267             | 0.0007658        | .                           | .                        | .                     | .                  | .                        | .                     | .                    | .                 | yes            |
| C5orf42   | .                 | .              | .                   | .                | .                           | .                        | .                     | .                  | .                        | .                     | 0.4560374            | 4.44E-05          | .              |
| C6orf106  | .                 | .              | .                   | .                | .                           | .                        | .                     | .                  | 0.5551622                | 2.85E-07              | .                    | .                 | .              |
| C6orf211  | .                 | .              | .                   | .                | .                           | .                        | .                     | .                  | 0.6070675                | 9.81E-09              | .                    | .                 | .              |
| C6orf222  | .                 | .              | 0.4045984           | 0.0003497        | .                           | .                        | .                     | .                  | .                        | .                     | .                    | .                 | .              |
| C6orf47   | .                 | .              | 0.3902335           | 0.0005879        | .                           | .                        | .                     | .                  | .                        | .                     | .                    | .                 | .              |
| C6orf62   | .                 | .              | 0.4448905           | 7.14E-05         | .                           | .                        | .                     | .                  | .                        | .                     | .                    | .                 | .              |
| C7orf26   | .                 | .              | .                   | .                | 0.4544922                   | 4.75E-05                 | .                     | .                  | .                        | .                     | .                    | .                 | .              |
| C7orf50   | .                 | .              | .                   | .                | 0.4691904                   | 2.48E-05                 | .                     | .                  | .                        | .                     | .                    | .                 | .              |
| C7orf55   | .                 | .              | 0.4379611           | 9.52E-05         | .                           | .                        | .                     | .                  | 0.7329449                | 1.14E-13              | .                    | .                 | .              |
| C8G       | .                 | .              | .                   | .                | .                           | .                        | .                     | .                  | 0.438069                 | 9.48E-05              | .                    | .                 | .              |
| C8orf4    | .                 | .              | .                   | .                | .                           | .                        | .                     | .                  | 0.6714504                | 5.85E-11              | .                    | .                 | .              |
| C9orf116  | 0.5108247         | 3.32E-06       | .                   | .                | .                           | .                        | .                     | .                  | .                        | .                     | .                    | .                 | .              |
| C9orf41   | .                 | .              | .                   | .                | .                           | .                        | .                     | .                  | 0.7174707                | 6.38E-13              | .                    | .                 | .              |
| C9orf72   | .                 | .              | .                   | .                | .                           | .                        | .                     | .                  | 0.4869713                | 1.08E-05              | .                    | .                 | .              |
| CA4       | .                 | .              | .                   | .                | .                           | .                        | 0.5349759             | 9.09E-07           | 0.3326                   | 0.0037875             | .                    | .                 | .              |
| CAB39     | .                 | .              | 0.3849788           | 0.0007069        | .                           | .                        | .                     | .                  | .                        | .                     | .                    | .                 | .              |
| CAB39L    | .                 | .              | 0.4172228           | 0.0002172        | .                           | .                        | .                     | .                  | .                        | .                     | .                    | .                 | .              |
| CABP5     | .                 | .              | .                   | .                | .                           | .                        | .                     | .                  | .                        | .                     | 0.5658587            | 1.49E-07          | .              |
| CACNA1E   | .                 | .              | .                   | .                | .                           | .                        | .                     | .                  | .                        | .                     | 0.5455426            | 5.00E-07          | .              |
| CACNA1S   | .                 | .              | .                   | .                | .                           | .                        | .                     | .                  | 0.4898594                | 9.44E-06              | .                    | .                 | .              |
| CACNA2D2  | .                 | .              | 0.4718868           | 2.19E-05         | .                           | .                        | .                     | .                  | .                        | .                     | .                    | .                 | .              |
| CACNB3    | .                 | .              | 0.4358726           | 0.0001037        | .                           | .                        | .                     | .                  | .                        | .                     | .                    | .                 | .              |
| CACNG7    | .                 | .              | .                   | .                | .                           | .                        | .                     | .                  | 0.5103633                | 3.40E-06              | .                    | .                 | .              |
| CACTIN    | .                 | .              | 0.3962238           | 0.0004748        | .                           | .                        | .                     | .                  | 0.3527454                | 0.0020527             | .                    | .                 | .              |
| CAD       | .                 | .              | .                   | .                | .                           | .                        | .                     | .                  | .                        | .                     | .                    | .                 | yes            |
| CADPS     | .                 | .              | .                   | .                | .                           | .                        | .                     | .                  | .                        | .                     | 0.6940904            | 7.04E-12          | .              |
| CADPS2    | .                 | .              | .                   | .                | .                           | .                        | .                     | .                  | .                        | .                     | 0.4518119            | 5.33E-05          | .              |
| CALCA     | 0.7473192         | 2.05E-14       | .                   | .                | .                           | .                        | .                     | .                  | .                        | .                     | .                    | .                 | .              |
| CALR      | .                 | .              | 0.336274            | 0.0033971        | .                           | .                        | .                     | .                  | 0.7865607                | 9.98E-17              | .                    | .                 | yes            |
| CALU      | .                 | .              | 0.3432506           | 0.0027533        | .                           | .                        | .                     | .                  | .                        | .                     | .                    | .                 | yes            |
| CAMK2A    | .                 | .              | .                   | .                | .                           | .                        | .                     | .                  | 0.7480006                | 1.88E-14              | .                    | .                 | .              |
| CAMK2G    | .                 | .              | 0.3752711           | 0.0009858        | .                           | .                        | .                     | .                  | .                        | .                     | .                    | .                 | .              |
| CAMLG     | .                 | .              | .                   | .                | .                           | .                        | .                     | .                  | 0.6394252                | 8.68E-10              | .                    | .                 | .              |
| CAMSAP3   | .                 | .              | .                   | .                | .                           | .                        | .                     | .                  | .                        | .                     | 0.5626585            | 1.81E-07          | .              |
| CAMTA2    | .                 | .              | .                   | .                | .                           | .                        | .                     | .                  | 0.4493563                | 5.92E-05              | .                    | .                 | .              |
| CAND1     | .                 | .              | 0.4474914           | 6.40E-05         | .                           | .                        | .                     | .                  | .                        | .                     | .                    | .                 | yes            |
| CAND2     | .                 | .              | .                   | .                | .                           | .                        | .                     | .                  | .                        | .                     | .                    | .                 | yes            |
| CANX      | .                 | .              | .                   | .                | .                           | .                        | .                     | .                  | 0.5086632                | 3.71E-06              | .                    | .                 | yes            |
| CAP1      | .                 | .              | .                   | .                | .                           | .                        | .                     | .                  | .                        | .                     | .                    | .                 | yes            |
| CAP2      | .                 | .              | 0.4041537           | 0.0003555        | .                           | .                        | .                     | .                  | 0.5887012                | 3.46E-08              | .                    | .                 | .              |
| CAPG      | .                 | .              | 0.5609485           | 2.01E-07         | .                           | .                        | .                     | .                  | .                        | .                     | .                    | .                 | .              |
| CAPN2     | .                 | .              | 0.3321371           | 0.0038394        | .                           | .                        | .                     | .                  | 0.6519788                | 3.13E-10              | .                    | .                 | .              |
| CAPN6     | .                 | .              | 0.3533622           | 0.0020132        | .                           | .                        | 0.4230464             | 0.0001732          | .                        | .                     | .                    | .                 | yes            |
| CAPNS1    | .                 | .              | 0.3009242           | 0.0091803        | .                           | .                        | .                     | .                  | 0.633679                 | 1.36E-09              | .                    | .                 | .              |
| CAPRIN1   | .                 | .              | .                   | .                | 0.5145407                   | 2.73E-06                 | .                     | .                  | 0.3677581                | 0.0012664             | .                    | .                 | yes            |
| CAPS2     | .                 | .              | .                   | .                | .                           | .                        | .                     | .                  | .                        | .                     | 0.5758258            | 7.98E-08          | .              |



| Gene     | Atrial Expression | P-value Atrial | AV-Canal Expression | P-value AV-Canal | Branchial Arches Expression | P-value Branchial Arches | Heart Tube Expression | P-value Heart Tube | Outflow Tract Expression | P-value Outflow Tract | Ventricle Expression | P-value Ventricle | DMP Expression |
|----------|-------------------|----------------|---------------------|------------------|-----------------------------|--------------------------|-----------------------|--------------------|--------------------------|-----------------------|----------------------|-------------------|----------------|
| CDC16    | .                 | .              | .                   | .                | .                           | .                        | .                     | .                  | .                        | .                     | .                    | .                 | yes            |
| CDC20    | .                 | .              | .                   | .                | .                           | .                        | .                     | 0.4831638          | 1.30E-05                 | .                     | .                    | .                 | .              |
| CDC20B   | .                 | .              | .                   | .                | .                           | .                        | .                     | 0.6821265          | 2.21E-11                 | .                     | .                    | .                 | .              |
| CDC27    | .                 | .              | .                   | .                | .                           | .                        | .                     | 0.5579846          | 2.40E-07                 | .                     | .                    | .                 | yes            |
| CDC34    | .                 | .              | .                   | .                | .                           | .                        | .                     | 0.5800877          | 6.08E-08                 | .                     | .                    | .                 | .              |
| CDC37    | .                 | .              | .                   | .                | .                           | .                        | .                     | 0.7129599          | 1.03E-12                 | .                     | .                    | .                 | yes            |
| CDC40    | .                 | .              | .                   | .                | .                           | .                        | .                     | .                  | .                        | 0.6915654             | 9.00E-12             | .                 | .              |
| CDC42    | .                 | .              | .                   | .                | .                           | .                        | .                     | .                  | .                        | .                     | .                    | .                 | yes            |
| CDC42BPB | .                 | .              | .                   | .                | .                           | .                        | .                     | .                  | .                        | .                     | .                    | .                 | yes            |
| CDC42EP5 | .                 | .              | 0.623166            | 3.04E-09         | .                           | .                        | .                     | .                  | .                        | .                     | .                    | .                 | .              |
| CDH11    | .                 | .              | .                   | .                | .                           | .                        | .                     | .                  | .                        | .                     | .                    | .                 | yes            |
| CDH13    | .                 | .              | 0.4047166           | 0.0003482        | .                           | .                        | .                     | 0.310936           | 0.0070088                | .                     | .                    | .                 | .              |
| CDH18    | .                 | .              | .                   | .                | 0.4482777                   | 6.19E-05                 | .                     | .                  | .                        | .                     | .                    | .                 | .              |
| CDH2     | .                 | .              | 0.4845644           | 1.22E-05         | .                           | .                        | .                     | 0.3992792          | 0.000425                 | .                     | .                    | .                 | .              |
| CDH20    | .                 | .              | 0.4846635           | 1.21E-05         | .                           | .                        | .                     | .                  | .                        | .                     | .                    | .                 | .              |
| CDH23    | .                 | .              | .                   | .                | .                           | .                        | .                     | 0.4955802          | 7.14E-06                 | .                     | .                    | .                 | .              |
| CDH3     | .                 | .              | .                   | .                | .                           | .                        | .                     | 0.5528789          | 3.26E-07                 | .                     | .                    | .                 | .              |
| CDIP1    | .                 | .              | .                   | .                | .                           | .                        | 0.3902791             | 0.000587           | 0.61493                  | 5.58E-09              | .                    | .                 | .              |
| CDK1     | .                 | .              | .                   | .                | .                           | .                        | .                     | .                  | .                        | .                     | .                    | .                 | yes            |
| CDK16    | .                 | .              | 0.382011            | 0.0007834        | .                           | .                        | .                     | .                  | .                        | .                     | .                    | .                 | yes            |
| CDK2AP1  | .                 | .              | .                   | .                | 0.3016332                   | 0.0090092                | .                     | .                  | 0.5422511                | 6.03E-07              | .                    | .                 | .              |
| CDK4     | .                 | .              | .                   | .                | .                           | .                        | .                     | .                  | .                        | .                     | .                    | .                 | yes            |
| CDK6     | .                 | .              | 0.4090533           | 0.0002962        | .                           | .                        | .                     | 0.3750576          | 0.000993                 | .                     | .                    | .                 | .              |
| CDK9     | .                 | .              | 0.3779084           | 0.0009016        | .                           | .                        | .                     | 0.3008781          | 0.0091915                | .                     | .                    | .                 | .              |
| CDKL1    | .                 | .              | 0.4446428           | 7.22E-05         | .                           | .                        | .                     | .                  | .                        | .                     | .                    | .                 | .              |
| CDKN1C   | .                 | .              | .                   | .                | .                           | .                        | .                     | 0.4853132          | 1.17E-05                 | .                     | .                    | .                 | yes            |
| CDR2L    | .                 | .              | .                   | .                | .                           | .                        | .                     | 0.470776           | 2.31E-05                 | .                     | .                    | .                 | .              |
| CDT1     | .                 | .              | .                   | .                | 0.486056                    | 1.13E-05                 | .                     | .                  | .                        | .                     | .                    | .                 | .              |
| CELF1    | .                 | .              | 0.3437028           | 0.0027156        | .                           | .                        | .                     | .                  | .                        | .                     | .                    | .                 | yes            |
| CEND1    | .                 | .              | .                   | .                | .                           | .                        | .                     | 0.6126498          | 6.58E-09                 | .                     | .                    | .                 | .              |
| CENPE    | .                 | .              | 0.4882225           | 1.02E-05         | .                           | .                        | .                     | .                  | .                        | .                     | .                    | .                 | .              |
| CENPF    | .                 | .              | .                   | .                | .                           | .                        | .                     | .                  | .                        | .                     | .                    | .                 | yes            |
| CENPM    | .                 | .              | .                   | .                | .                           | .                        | .                     | .                  | .                        | 0.561598              | 1.93E-07             | .                 | .              |
| CENPN    | .                 | .              | .                   | .                | .                           | .                        | .                     | 0.4831196          | 1.30E-05                 | .                     | .                    | .                 | .              |
| CENPO    | .                 | .              | .                   | .                | .                           | .                        | .                     | .                  | .                        | 0.4879172             | 1.04E-05             | .                 | .              |
| CENPT    | .                 | .              | .                   | .                | .                           | .                        | .                     | 0.5506751          | 3.71E-07                 | .                     | .                    | .                 | .              |
| CEP19    | .                 | .              | .                   | .                | .                           | .                        | .                     | 0.442931           | 7.75E-05                 | .                     | .                    | .                 | .              |
| CEP55    | .                 | .              | 0.5111123           | 3.27E-06         | .                           | .                        | .                     | .                  | .                        | .                     | .                    | .                 | .              |
| CEP68    | .                 | .              | .                   | .                | .                           | .                        | .                     | 0.6634068          | 1.19E-10                 | .                     | .                    | .                 | .              |
| CERS5    | .                 | .              | 0.4155689           | 0.0002314        | .                           | .                        | .                     | .                  | .                        | .                     | .                    | .                 | .              |
| CES1     | .                 | .              | .                   | .                | .                           | .                        | .                     | .                  | .                        | 0.6952951             | 6.25E-12             | .                 | .              |
| CFDP1    | .                 | .              | .                   | .                | .                           | .                        | .                     | .                  | .                        | .                     | .                    | .                 | yes            |
| CFL1     | .                 | .              | .                   | .                | .                           | .                        | .                     | 0.6607398          | 1.49E-10                 | .                     | .                    | .                 | yes            |
| CGNL1    | .                 | .              | 0.3966744           | 0.0004671        | .                           | .                        | .                     | 0.538987           | 7.26E-07                 | .                     | .                    | .                 | yes            |
| CHAF1A   | .                 | .              | .                   | .                | .                           | .                        | .                     | .                  | .                        | .                     | .                    | .                 | yes            |
| CHCHD10  | .                 | .              | .                   | .                | .                           | 0.318088                 | 0.0057477             | 0.6122355          | 6.78E-09                 | .                     | .                    | .                 | .              |
| CHCHD3   | .                 | .              | .                   | .                | .                           | .                        | .                     | 0.6505889          | 3.51E-10                 | .                     | .                    | .                 | .              |
| CHD2     | .                 | .              | 0.3980045           | 0.0004452        | .                           | .                        | .                     | 0.3120485          | 0.0067979                | .                     | .                    | .                 | .              |
| CHD3     | .                 | .              | .                   | .                | .                           | .                        | .                     | .                  | .                        | .                     | .                    | .                 | yes            |
| CHD4     | .                 | .              | .                   | .                | .                           | .                        | .                     | 0.7145499          | 8.73E-13                 | .                     | .                    | .                 | yes            |
| CHD5     | .                 | .              | .                   | .                | .                           | .                        | .                     | .                  | .                        | 0.6220695             | 3.30E-09             | .                 | .              |
| CHD7     | .                 | .              | .                   | .                | 0.3601516                   | 0.0016222                | .                     | .                  | .                        | .                     | .                    | .                 | yes            |
| CHD8     | .                 | .              | .                   | .                | 0.4543818                   | 4.77E-05                 | .                     | .                  | .                        | .                     | .                    | .                 | yes            |
| CHERP    | .                 | .              | 0.3713795           | 0.0011232        | .                           | .                        | .                     | .                  | .                        | .                     | .                    | .                 | yes            |
| CHIT1    | .                 | .              | 0.420826            | 0.0001889        | .                           | .                        | .                     | .                  | .                        | .                     | .                    | .                 | .              |
| CHML     | .                 | .              | 0.5377241           | 7.80E-07         | .                           | .                        | .                     | .                  | .                        | .                     | .                    | .                 | .              |
| CHMP1A   | .                 | .              | .                   | .                | .                           | .                        | .                     | 0.6733036          | 4.95E-11                 | .                     | .                    | .                 | .              |
| CHMP1B   | .                 | .              | .                   | .                | .                           | .                        | .                     | 0.4550907          | 4.63E-05                 | .                     | .                    | .                 | .              |
| CHMP4B   | .                 | .              | 0.2999468           | 0.0094209        | .                           | .                        | .                     | 0.6542362          | 2.59E-10                 | .                     | .                    | .                 | .              |
| CHMP6    | .                 | .              | 0.4688673           | 2.52E-05         | .                           | .                        | .                     | .                  | .                        | .                     | .                    | .                 | .              |
| CHRD     | .                 | .              | .                   | .                | .                           | .                        | .                     | 0.8307254          | 5.41E-20                 | .                     | .                    | .                 | .              |
| CHRNA10  | .                 | .              | 0.3881347           | 0.0006331        | .                           | .                        | .                     | .                  | .                        | .                     | .                    | .                 | .              |
| CHST14   | .                 | .              | 0.3008699           | 0.0091935        | .                           | .                        | .                     | 0.6312272          | 1.65E-09                 | .                     | .                    | .                 | .              |
| CHST15   | .                 | .              | .                   | .                | .                           | .                        | .                     | 0.4899395          | 9.40E-06                 | .                     | .                    | .                 | .              |
| CHST8    | .                 | .              | .                   | .                | .                           | .                        | .                     | .                  | .                        | 0.6997042             | 4.04E-12             | .                 | .              |
| CHSY1    | .                 | .              | .                   | .                | .                           | .                        | .                     | 0.5936481          | 2.48E-08                 | .                     | .                    | .                 | .              |
| CHTF8    | .                 | .              | .                   | .                | .                           | .                        | .                     | .                  | .                        | .                     | .                    | .                 | yes            |
| CIAO1    | .                 | .              | .                   | .                | .                           | .                        | .                     | 0.4378355          | 9.57E-05                 | .                     | .                    | .                 | .              |
| CIAPIN1  | .                 | .              | .                   | .                | .                           | .                        | .                     | 0.7263887          | 2.39E-13                 | .                     | .                    | .                 | .              |
| CIR1     | .                 | .              | 0.4149203           | 0.0002372        | .                           | .                        | .                     | .                  | .                        | .                     | .                    | .                 | .              |
| CISD3    | .                 | .              | .                   | .                | .                           | .                        | .                     | 0.5628457          | 1.79E-07                 | .                     | .                    | .                 | .              |
| CIT      | .                 | .              | .                   | .                | .                           | .                        | .                     | .                  | .                        | 0.5932889             | 2.54E-08             | .                 | .              |
| CITED1   | .                 | .              | .                   | .                | .                           | .                        | .                     | .                  | .                        | 0.6602847             | 1.55E-10             | .                 | .              |
| CITED4   | .                 | .              | 0.470932            | 2.29E-05         | .                           | .                        | .                     | .                  | .                        | .                     | .                    | .                 | .              |
| CKAP4    | .                 | .              | 0.3475045           | 0.0024165        | .                           | .                        | .                     | 0.6769187          | 3.57E-11                 | .                     | .                    | .                 | yes            |



| Gene    | Atrial Expression | P-value Atrial | AV-Canal Expression | P-value AV-Canal | Branchial Arches Expression | P-value Branchial Arches | Heart Tube Expression | P-value Heart Tube | Outflow Tract Expression | P-value Outflow Tract | Ventricle Expression | P-value Ventricle | DMP Expression |
|---------|-------------------|----------------|---------------------|------------------|-----------------------------|--------------------------|-----------------------|--------------------|--------------------------|-----------------------|----------------------|-------------------|----------------|
| CKAP5   | .                 | .              | 0.4055782           | 0.0003372        | .                           | .                        | .                     | .                  | .                        | .                     | .                    | .                 | yes            |
| CLASP1  | .                 | .              | .                   | .                | .                           | .                        | .                     | .                  | .                        | .                     | .                    | .                 | yes            |
| CLASP2  | .                 | .              | .                   | .                | .                           | .                        | .                     | .                  | .                        | 0.627014              | 2.27E-09             | .                 | .              |
| CLCN5   | .                 | .              | .                   | .                | .                           | .                        | .                     | 0.4446834          | 7.21E-05                 | .                     | .                    | .                 | .              |
| CLDND1  | .                 | .              | 0.4279668           | 0.0001426        | .                           | .                        | .                     | .                  | .                        | .                     | .                    | .                 | .              |
| CLEC2D  | .                 | .              | .                   | .                | 0.5070944                   | 4.01E-06                 | .                     | .                  | .                        | .                     | .                    | .                 | .              |
| CLIC1   | .                 | .              | 0.4713055           | 2.25E-05         | .                           | .                        | .                     | 0.55931            | 2.22E-07                 | .                     | .                    | .                 | .              |
| CLIC4   | .                 | .              | 0.4920626           | 8.48E-06         | .                           | .                        | .                     | 0.6320192          | 1.55E-09                 | .                     | .                    | .                 | yes            |
| CLIP3   | .                 | .              | .                   | .                | 0.4990881                   | 6.01E-06                 | .                     | .                  | .                        | .                     | .                    | .                 | .              |
| CLK3    | .                 | .              | 0.4083362           | 0.0003043        | .                           | .                        | .                     | .                  | .                        | .                     | .                    | .                 | .              |
| CLN5    | .                 | .              | 0.5230409           | 1.74E-06         | .                           | .                        | .                     | 0.4705412          | 2.33E-05                 | .                     | .                    | .                 | .              |
| CLN6    | .                 | .              | .                   | .                | .                           | .                        | .                     | 0.5737702          | 9.10E-08                 | .                     | .                    | .                 | .              |
| CLN8    | .                 | .              | 0.5482195           | 4.28E-07         | .                           | .                        | .                     | .                  | .                        | .                     | .                    | .                 | .              |
| CLOCK   | .                 | .              | .                   | .                | .                           | .                        | .                     | .                  | .                        | 0.6915327             | 9.02E-12             | .                 | .              |
| CLPP    | .                 | .              | .                   | .                | .                           | .                        | .                     | 0.4671709          | 2.72E-05                 | .                     | .                    | .                 | .              |
| CLPTM1  | .                 | .              | .                   | .                | .                           | .                        | .                     | 0.7511936          | 1.27E-14                 | .                     | .                    | .                 | .              |
| CLPTM1L | .                 | .              | 0.4444788           | 7.27E-05         | .                           | .                        | .                     | 0.6521363          | 3.09E-10                 | .                     | .                    | .                 | .              |
| CLTA    | .                 | .              | .                   | .                | .                           | .                        | .                     | 0.6604841          | 1.53E-10                 | .                     | .                    | .                 | .              |
| CLTC    | .                 | .              | .                   | .                | .                           | .                        | .                     | .                  | .                        | .                     | .                    | .                 | yes            |
| CLUH    | .                 | .              | .                   | .                | .                           | .                        | .                     | 0.8185925          | 5.22E-19                 | .                     | .                    | .                 | .              |
| CLVS2   | .                 | .              | .                   | .                | .                           | 0.4834159                | 1.28E-05              | .                  | .                        | .                     | .                    | .                 | .              |
| CMAS    | .                 | .              | 0.3340244           | 0.0036317        | .                           | .                        | .                     | 0.545905           | 4.89E-07                 | .                     | .                    | .                 | .              |
| CMTM5   | .                 | .              | .                   | .                | .                           | 0.5605009                | 2.07E-07              | .                  | .                        | .                     | .                    | .                 | .              |
| CMTM7   | .                 | .              | .                   | .                | .                           | .                        | .                     | 0.7463965          | 2.30E-14                 | .                     | .                    | .                 | .              |
| CMTR1   | .                 | .              | .                   | .                | .                           | .                        | .                     | 0.4504221          | 5.65E-05                 | .                     | .                    | .                 | .              |
| CNPB    | .                 | .              | .                   | .                | .                           | .                        | .                     | .                  | .                        | .                     | .                    | .                 | yes            |
| CNEP1R1 | .                 | .              | 0.4087748           | 0.0002993        | .                           | .                        | .                     | 0.4214459          | 0.0001844                | .                     | .                    | .                 | .              |
| CNGA3   | .                 | .              | .                   | .                | .                           | .                        | .                     | .                  | .                        | 0.4680097             | 2.61E-05             | .                 | .              |
| CNIH1   | .                 | .              | 0.3249695           | 0.0047279        | .                           | .                        | .                     | 0.7065333          | 2.02E-12                 | .                     | .                    | .                 | .              |
| CNKSR2  | .                 | .              | .                   | .                | .                           | .                        | .                     | 0.5254997          | 1.53E-06                 | .                     | .                    | .                 | .              |
| CNN1    | .                 | .              | .                   | .                | .                           | .                        | .                     | 0.7680528          | 1.40E-15                 | .                     | .                    | .                 | .              |
| CNN2    | .                 | .              | 0.3698941           | 0.0011801        | .                           | .                        | .                     | 0.7087505          | 1.61E-12                 | .                     | .                    | .                 | yes            |
| CNN3    | .                 | .              | 0.4298769           | 0.0001322        | .                           | .                        | .                     | 0.6084902          | 8.87E-09                 | .                     | .                    | .                 | yes            |
| CNNM1   | .                 | .              | .                   | .                | .                           | .                        | .                     | .                  | .                        | 0.5673495             | 1.36E-07             | .                 | .              |
| CNOT1   | .                 | .              | .                   | .                | 0.5056764                   | 4.31E-06                 | .                     | .                  | .                        | .                     | .                    | .                 | yes            |
| CNOT10  | .                 | .              | 0.3023654           | 0.0088354        | .                           | .                        | .                     | 0.5987887          | 1.75E-08                 | .                     | .                    | .                 | .              |
| CNOT7   | .                 | .              | 0.3929672           | 0.0005335        | .                           | .                        | .                     | .                  | .                        | .                     | .                    | .                 | .              |
| CNPY3   | .                 | .              | .                   | .                | .                           | .                        | .                     | 0.6935881          | 7.39E-12                 | .                     | .                    | .                 | .              |
| CNST    | .                 | .              | .                   | .                | .                           | .                        | .                     | 0.5107417          | 3.33E-06                 | .                     | .                    | .                 | .              |
| CNTNAP1 | .                 | .              | .                   | .                | .                           | .                        | .                     | .                  | .                        | 0.7002859             | 3.81E-12             | .                 | .              |
| CNTNAP3 | .                 | .              | .                   | .                | .                           | .                        | .                     | .                  | .                        | 0.7012598             | 3.45E-12             | .                 | .              |
| COA5    | .                 | .              | 0.3516475           | 0.0021245        | .                           | 0.3086678                | 0.0074566             | 0.6310445          | 1.67E-09                 | .                     | .                    | .                 | .              |
| COG6    | .                 | .              | .                   | .                | .                           | .                        | .                     | 0.5797495          | 6.21E-08                 | .                     | .                    | .                 | .              |
| COG7    | .                 | .              | .                   | .                | .                           | .                        | .                     | 0.5331241          | 1.01E-06                 | .                     | .                    | .                 | .              |
| COG8    | .                 | .              | .                   | .                | .                           | .                        | .                     | 0.5277532          | 1.35E-06                 | .                     | .                    | .                 | .              |
| COL18A1 | .                 | .              | .                   | .                | .                           | .                        | .                     | 0.6885797          | 1.20E-11                 | .                     | .                    | .                 | yes            |
| COL1A1  | .                 | .              | .                   | .                | .                           | .                        | .                     | .                  | .                        | .                     | .                    | .                 | yes            |
| COL1A2  | .                 | .              | .                   | .                | .                           | .                        | .                     | .                  | .                        | .                     | .                    | .                 | yes            |
| COL26A1 | .                 | .              | .                   | .                | .                           | .                        | .                     | .                  | .                        | .                     | .                    | .                 | yes            |
| COL2A1  | .                 | .              | .                   | .                | .                           | .                        | .                     | 0.9260268          | 3.46E-32                 | .                     | .                    | .                 | yes            |
| COL3A1  | .                 | .              | .                   | .                | .                           | .                        | .                     | .                  | .                        | .                     | .                    | .                 | yes            |
| COL4A1  | .                 | .              | .                   | .                | .                           | .                        | .                     | 0.5086416          | 3.71E-06                 | .                     | .                    | .                 | yes            |
| COL4A2  | .                 | .              | .                   | .                | .                           | .                        | .                     | 0.3752967          | 0.000985                 | .                     | .                    | .                 | yes            |
| COL4A5  | .                 | .              | 0.4917944           | 8.59E-06         | .                           | .                        | .                     | .                  | .                        | .                     | .                    | .                 | .              |
| COL4A6  | .                 | .              | 0.4948974           | 7.39E-06         | .                           | .                        | .                     | 0.3319016          | 0.003866                 | .                     | .                    | .                 | .              |
| COL5A1  | .                 | .              | .                   | .                | .                           | .                        | .                     | 0.4723413          | 2.15E-05                 | .                     | .                    | .                 | yes            |
| COL9A3  | .                 | .              | 0.5698349           | 1.16E-07         | .                           | .                        | .                     | .                  | .                        | .                     | .                    | .                 | .              |
| COLQ    | .                 | .              | .                   | .                | .                           | .                        | .                     | 0.7192236          | 5.28E-13                 | .                     | .                    | .                 | .              |
| COMMD8  | .                 | .              | 0.502355            | 5.10E-06         | .                           | .                        | .                     | .                  | .                        | .                     | .                    | .                 | .              |
| COMMD9  | .                 | .              | .                   | .                | .                           | .                        | .                     | 0.5912078          | 2.92E-08                 | .                     | .                    | .                 | .              |
| COPA    | .                 | .              | 0.4331389           | 0.0001159        | .                           | .                        | .                     | .                  | .                        | .                     | .                    | .                 | yes            |
| COPB1   | .                 | .              | 0.390566            | 0.0005811        | .                           | .                        | .                     | 0.6569416          | 2.07E-10                 | .                     | .                    | .                 | .              |
| COPB2   | .                 | .              | 0.3608513           | 0.0015861        | .                           | .                        | .                     | .                  | .                        | .                     | .                    | .                 | yes            |
| COPG1   | .                 | .              | 0.3171837           | 0.0058952        | .                           | .                        | .                     | 0.3606219          | 0.0015978                | .                     | .                    | .                 | yes            |
| COPG2   | .                 | .              | 0.4408344           | 8.46E-05         | .                           | .                        | .                     | .                  | .                        | .                     | .                    | .                 | .              |
| COPS2   | .                 | .              | .                   | .                | .                           | .                        | .                     | .                  | .                        | .                     | .                    | .                 | yes            |
| COPS3   | .                 | .              | .                   | .                | .                           | .                        | .                     | 0.4542801          | 4.79E-05                 | .                     | .                    | .                 | .              |
| COPS5   | .                 | .              | 0.5539224           | 3.06E-07         | .                           | .                        | .                     | .                  | .                        | .                     | .                    | .                 | .              |
| COPS8   | .                 | .              | 0.3831876           | 0.0007522        | .                           | .                        | .                     | 0.5777235          | 7.07E-08                 | .                     | .                    | .                 | .              |
| COPZ1   | .                 | .              | .                   | .                | .                           | .                        | .                     | 0.5740221          | 8.95E-08                 | .                     | .                    | .                 | yes            |
| COQ10B  | .                 | .              | 0.4451157           | 7.08E-05         | .                           | .                        | .                     | .                  | .                        | .                     | .                    | .                 | .              |
| COQ3    | .                 | .              | .                   | .                | .                           | .                        | .                     | 0.4439873          | 7.42E-05                 | .                     | .                    | .                 | .              |
| COQ6    | .                 | .              | .                   | .                | .                           | .                        | .                     | 0.5941698          | 2.40E-08                 | .                     | .                    | .                 | .              |
| COQ7    | .                 | .              | 0.3979745           | 0.0004457        | .                           | 0.3508422                | 0.0021787             | .                  | .                        | .                     | .                    | .                 | .              |
| CORO1C  | .                 | .              | .                   | .                | .                           | .                        | .                     | 0.8404458          | 7.71E-21                 | .                     | .                    | .                 | yes            |







| Gene     | Atrial Expression | P-value Atrial | AV-Canal Expression | P-value AV-Canal | Branchial Arches Expression | P-value Branchial Arches | Heart Tube Expression | P-value Heart Tube | Outflow Tract Expression | P-value Outflow Tract | Ventricle Expression | P-value Ventricle | DMP Expression |
|----------|-------------------|----------------|---------------------|------------------|-----------------------------|--------------------------|-----------------------|--------------------|--------------------------|-----------------------|----------------------|-------------------|----------------|
| DVL3     | .                 | .              | .                   | .                | .                           | .                        | .                     | 0.5028565          | 4.97E-06                 | .                     | .                    | .                 | .              |
| DYNC1H1  | .                 | .              | .                   | .                | 0.3358673                   | 0.0034385                | .                     | 0.3324102          | 0.0038087                | .                     | .                    | .                 | yes            |
| DYNC1LI1 | .                 | .              | .                   | .                | .                           | .                        | .                     | 0.6847261          | 1.73E-11                 | .                     | .                    | .                 | .              |
| DYNC1LI2 | .                 | 0.5166324      | 2.45E-06            | .                | .                           | .                        | .                     | 0.4108916          | 0.0002764                | .                     | .                    | .                 | .              |
| DYNLL1   | .                 | 0.3698008      | 0.0011838           | .                | .                           | .                        | .                     | 0.5997742          | 1.63E-08                 | .                     | .                    | .                 | .              |
| DYNLL2   | .                 | .              | .                   | .                | .                           | .                        | .                     | 0.354383           | 0.0019495                | .                     | .                    | .                 | yes            |
| DYNLRB1  | .                 | .              | .                   | .                | .                           | .                        | .                     | 0.6129428          | 6.45E-09                 | .                     | .                    | .                 | .              |
| DYRK2    | .                 | .              | .                   | .                | .                           | .                        | .                     | 0.6734366          | 4.89E-11                 | .                     | .                    | .                 | .              |
| DYRK3    | 0.4587174         | 3.95E-05       | .                   | .                | .                           | .                        | .                     | .                  | .                        | .                     | .                    | .                 | .              |
| E2F1     | .                 | .              | 0.4110743           | 0.0002745        | 0.5659125                   | 1.49E-07                 | .                     | .                  | .                        | .                     | .                    | .                 | .              |
| E2F3     | .                 | .              | 0.5316296           | 1.09E-06         | .                           | .                        | .                     | .                  | .                        | .                     | .                    | .                 | .              |
| E2F7     | .                 | .              | .                   | .                | .                           | .                        | .                     | 0.6007955          | 1.52E-08                 | .                     | .                    | .                 | .              |
| EBF2     | .                 | .              | .                   | .                | .                           | .                        | .                     | .                  | .                        | 0.6749335             | 4.27E-11             | .                 | .              |
| ECE1     | .                 | .              | .                   | .                | .                           | .                        | .                     | 0.6516691          | 3.21E-10                 | .                     | .                    | .                 | yes            |
| ECHS1    | .                 | .              | .                   | .                | .                           | .                        | .                     | 0.4682264          | 2.59E-05                 | .                     | .                    | .                 | .              |
| ECM1     | .                 | .              | 0.3296441           | 0.00413          | .                           | .                        | .                     | .                  | .                        | 0.4747682             | 1.92E-05             | .                 | .              |
| EDIL3    | .                 | .              | 0.5379942           | 7.68E-07         | .                           | .                        | .                     | .                  | .                        | .                     | .                    | .                 | .              |
| EDN1     | .                 | .              | 0.4086081           | 0.0003012        | .                           | .                        | .                     | 0.6071359          | 9.76E-09                 | .                     | .                    | .                 | .              |
| EEF1A2   | .                 | .              | 0.4972056           | 6.59E-06         | .                           | .                        | .                     | .                  | .                        | .                     | .                    | .                 | .              |
| EEF1B2   | .                 | .              | .                   | .                | .                           | .                        | 0.3471847             | 0.0024405          | 0.4040197                | 0.0003572             | .                    | .                 | yes            |
| EEF1D    | .                 | .              | .                   | .                | .                           | .                        | .                     | .                  | .                        | 0.5511764             | 3.60E-07             | .                 | yes            |
| EEF1G    | .                 | .              | 0.376681            | 0.00094          | .                           | .                        | .                     | 0.3785493          | 0.0008821                | .                     | .                    | .                 | .              |
| EEF2     | .                 | .              | .                   | .                | .                           | .                        | .                     | 0.6597675          | 1.62E-10                 | .                     | .                    | .                 | yes            |
| EEPD1    | .                 | .              | 0.4008497           | 0.0004014        | .                           | .                        | .                     | .                  | .                        | .                     | .                    | .                 | .              |
| EFCAB2   | .                 | .              | 0.4546915           | 4.71E-05         | .                           | .                        | .                     | .                  | .                        | .                     | .                    | .                 | .              |
| EFCAB4B  | .                 | .              | .                   | .                | .                           | .                        | .                     | 0.5647291          | 1.60E-07                 | .                     | .                    | .                 | .              |
| EFCC1    | .                 | .              | .                   | .                | .                           | .                        | .                     | 0.5516775          | 3.50E-07                 | .                     | .                    | .                 | .              |
| EFHD2    | .                 | .              | 0.5726915           | 9.74E-08         | .                           | .                        | .                     | 0.5478268          | 4.38E-07                 | .                     | .                    | .                 | .              |
| EFNA2    | .                 | .              | .                   | .                | 0.608429                    | 8.91E-09                 | .                     | 0.3082414          | 0.0075436                | .                     | .                    | .                 | .              |
| EFNB2    | .                 | .              | .                   | .                | .                           | .                        | .                     | 0.8502594          | 9.39E-22                 | .                     | .                    | .                 | .              |
| EFTUD2   | .                 | .              | .                   | .                | .                           | .                        | .                     | .                  | .                        | .                     | .                    | .                 | yes            |
| EHBP1L1  | .                 | .              | 0.4672782           | 2.70E-05         | .                           | .                        | .                     | .                  | .                        | .                     | .                    | .                 | .              |
| EHMT1    | .                 | .              | .                   | .                | .                           | .                        | .                     | .                  | .                        | .                     | .                    | .                 | yes            |
| EHMT2    | .                 | .              | .                   | .                | .                           | .                        | .                     | 0.5623528          | 1.85E-07                 | .                     | .                    | .                 | yes            |
| EID1     | .                 | .              | 0.6023969           | 1.36E-08         | .                           | .                        | .                     | .                  | .                        | .                     | .                    | .                 | yes            |
| EID2     | .                 | .              | .                   | .                | .                           | .                        | .                     | 0.6846495          | 1.74E-11                 | .                     | .                    | .                 | .              |
| EIF1     | .                 | .              | .                   | .                | 0.4998694                   | 5.78E-06                 | .                     | .                  | .                        | .                     | .                    | .                 | .              |
| EIF1AD   | .                 | .              | .                   | .                | 0.4982743                   | 6.25E-06                 | .                     | 0.3122362          | 0.0067629                | .                     | .                    | .                 | .              |
| EIF1AX   | .                 | .              | .                   | .                | .                           | .                        | .                     | 0.4384511          | 9.33E-05                 | .                     | .                    | .                 | .              |
| EIF2S1   | .                 | .              | 0.3239278           | 0.0048712        | .                           | .                        | .                     | 0.6490566          | 3.99E-10                 | .                     | .                    | .                 | .              |
| EIF2S3   | .                 | .              | 0.3990752           | 0.0004282        | .                           | .                        | .                     | .                  | .                        | .                     | .                    | .                 | .              |
| EIF3A    | .                 | .              | 0.4530084           | 5.06E-05         | .                           | .                        | .                     | 0.5016146          | 5.29E-06                 | .                     | .                    | .                 | yes            |
| EIF3B    | .                 | .              | .                   | .                | 0.378562                    | 0.0008817                | .                     | 0.5825466          | 5.18E-08                 | .                     | .                    | .                 | yes            |
| EIF3C    | .                 | .              | .                   | .                | .                           | .                        | .                     | 0.3921521          | 0.0005493                | .                     | .                    | .                 | yes            |
| EIF3D    | .                 | .              | .                   | .                | .                           | .                        | .                     | 0.3903345          | 0.0005858                | .                     | .                    | .                 | yes            |
| EIF3F    | .                 | .              | .                   | .                | .                           | .                        | .                     | .                  | .                        | .                     | .                    | .                 | yes            |
| EIF3G    | .                 | .              | 0.3729738           | 0.001065         | .                           | .                        | .                     | 0.5578843          | 2.42E-07                 | .                     | .                    | .                 | .              |
| EIF3I    | .                 | .              | 0.3237192           | 0.0049003        | .                           | .                        | .                     | 0.3583545          | 0.0017184                | .                     | .                    | .                 | yes            |
| EIF3K    | .                 | .              | .                   | .                | .                           | .                        | .                     | 0.4047831          | 0.0003473                | .                     | .                    | .                 | yes            |
| EIF3L    | .                 | .              | .                   | .                | .                           | .                        | .                     | 0.5273494          | 1.38E-06                 | .                     | .                    | .                 | yes            |
| EIF4A2   | .                 | .              | .                   | .                | .                           | .                        | .                     | .                  | .                        | .                     | .                    | .                 | yes            |
| EIF4B    | .                 | .              | .                   | .                | .                           | .                        | .                     | .                  | .                        | .                     | .                    | .                 | yes            |
| EIF4E    | .                 | .              | .                   | .                | .                           | .                        | .                     | 0.5771198          | 7.35E-08                 | .                     | .                    | .                 | .              |
| EIF4EBP1 | .                 | .              | 0.4951647           | 7.29E-06         | .                           | .                        | .                     | 0.4479476          | 6.28E-05                 | .                     | .                    | .                 | .              |
| EIF4G1   | .                 | .              | .                   | .                | .                           | .                        | .                     | .                  | .                        | .                     | .                    | .                 | yes            |
| EIF4G2   | .                 | .              | 0.3079893           | 0.0075954        | .                           | .                        | .                     | 0.3890204          | 0.0006137                | .                     | .                    | .                 | yes            |
| EIF4G3   | .                 | .              | .                   | .                | .                           | .                        | .                     | .                  | .                        | .                     | .                    | .                 | yes            |
| EIF4H    | .                 | .              | 0.4490906           | 5.98E-05         | .                           | .                        | .                     | 0.4613094          | 3.53E-05                 | .                     | .                    | .                 | yes            |
| EIF5     | .                 | .              | .                   | .                | .                           | .                        | .                     | 0.7226582          | 3.63E-13                 | .                     | .                    | .                 | yes            |
| EIF5A    | .                 | .              | 0.3880135           | 0.0006358        | .                           | .                        | .                     | 0.4649461          | 3.00E-05                 | .                     | .                    | .                 | yes            |
| EIF5A2   | .                 | .              | 0.6011846           | 1.48E-08         | .                           | .                        | .                     | .                  | .                        | .                     | .                    | .                 | .              |
| EIF5B    | .                 | .              | 0.3480416           | 0.0023768        | .                           | .                        | .                     | .                  | .                        | .                     | .                    | .                 | yes            |
| ELAVL1   | .                 | .              | .                   | .                | .                           | .                        | .                     | 0.7444109          | 2.93E-14                 | .                     | .                    | .                 | yes            |
| ELAVL2   | .                 | .              | .                   | .                | .                           | .                        | .                     | .                  | .                        | 0.4636688             | 3.18E-05             | .                 | .              |
| ELF5     | .                 | .              | .                   | .                | .                           | .                        | .                     | .                  | .                        | 0.5626547             | 1.81E-07             | .                 | .              |
| ELL2     | .                 | .              | 0.395227            | 0.0004921        | .                           | .                        | .                     | .                  | .                        | .                     | .                    | .                 | .              |
| ELMOD3   | .                 | .              | .                   | .                | .                           | .                        | .                     | 0.5160782          | 2.52E-06                 | .                     | .                    | .                 | .              |
| ELMSAN1  | .                 | .              | .                   | .                | .                           | .                        | .                     | 0.8841492          | 1.69E-25                 | .                     | .                    | .                 | .              |
| ELP2     | .                 | .              | .                   | .                | 0.3390238                   | 0.0031289                | .                     | .                  | .                        | .                     | .                    | .                 | yes            |
| ELP6     | .                 | .              | 0.3431247           | 0.0027639        | .                           | .                        | .                     | 0.5244811          | 1.61E-06                 | .                     | .                    | .                 | .              |
| ELTD1    | .                 | .              | .                   | .                | .                           | .                        | .                     | .                  | .                        | 0.4752896             | 1.88E-05             | .                 | .              |
| EMC1     | .                 | .              | 0.4082768           | 0.000305         | .                           | .                        | .                     | .                  | .                        | .                     | .                    | .                 | .              |
| EMILIN1  | .                 | .              | .                   | .                | .                           | .                        | .                     | 0.3438843          | 0.0027006                | .                     | .                    | .                 | yes            |
| EMILIN2  | .                 | .              | 0.4138557           | 0.0002471        | .                           | .                        | .                     | .                  | .                        | .                     | .                    | .                 | .              |
| EML4     | .                 | .              | .                   | .                | .                           | .                        | .                     | 0.7956985          | 2.45E-17                 | .                     | .                    | .                 | yes            |



| Gene     | Atrial Expression | P-value Atrial | AV-Canal Expression | P-value AV-Canal | Branchial Arches Expression | P-value Branchial Arches | Heart Tube Expression | P-value Heart Tube | Outflow Tract Expression | P-value Outflow Tract | Ventricle Expression | P-value Ventricle | DMP Expression |
|----------|-------------------|----------------|---------------------|------------------|-----------------------------|--------------------------|-----------------------|--------------------|--------------------------|-----------------------|----------------------|-------------------|----------------|
| FAM210A  | .                 | .              | 0.3995292           | 0.0004212        | .                           | .                        | .                     | .                  | 0.3947632                | 0.0005003             | .                    | .                 | .              |
| FAM210B  | .                 | .              | .                   | .                | .                           | .                        | .                     | .                  | .                        | .                     | 0.4563896            | 4.37E-05          | .              |
| FAM213A  | .                 | .              | .                   | .                | .                           | .                        | .                     | .                  | 0.6358712                | 1.15E-09              | .                    | .                 | .              |
| FAM214B  | .                 | .              | 0.3898798           | 0.0005953        | .                           | .                        | .                     | .                  | .                        | .                     | .                    | .                 | .              |
| FAM221B  | .                 | .              | 0.4626359           | 3.32E-05         | .                           | .                        | .                     | .                  | .                        | .                     | .                    | .                 | .              |
| FAM26D   | .                 | .              | .                   | .                | .                           | .                        | .                     | .                  | 0.5036595                | 4.78E-06              | .                    | .                 | .              |
| FAM26E   | .                 | .              | 0.4613849           | 3.51E-05         | .                           | .                        | .                     | .                  | .                        | .                     | .                    | .                 | .              |
| FAM43B   | .                 | .              | .                   | .                | .                           | .                        | .                     | .                  | 0.6744326                | 4.47E-11              | .                    | .                 | .              |
| FAM46D   | .                 | .              | .                   | .                | .                           | .                        | .                     | .                  | .                        | .                     | 0.5261248            | 1.48E-06          | .              |
| FAM58A   | .                 | .              | .                   | .                | .                           | .                        | .                     | .                  | 0.7526561                | 1.05E-14              | .                    | .                 | .              |
| FAM60A   | .                 | .              | .                   | .                | .                           | .                        | .                     | .                  | 0.6764763                | 3.71E-11              | .                    | .                 | .              |
| FAM69C   | .                 | .              | .                   | .                | .                           | .                        | .                     | .                  | 0.6665955                | 8.99E-11              | .                    | .                 | .              |
| FAM71E2  | .                 | .              | .                   | .                | .                           | .                        | .                     | .                  | 0.6689495                | 7.30E-11              | .                    | .                 | .              |
| FAM72A   | .                 | .              | 0.4166866           | 0.0002217        | .                           | .                        | .                     | .                  | .                        | .                     | .                    | .                 | .              |
| FAM73B   | .                 | .              | 0.3510125           | 0.0021671        | .                           | .                        | .                     | .                  | 0.4979351                | 6.36E-06              | .                    | .                 | .              |
| FAM76A   | .                 | .              | 0.418288            | 0.0002084        | .                           | .                        | .                     | .                  | .                        | .                     | .                    | .                 | .              |
| FAM78A   | .                 | .              | 0.6577965           | 1.92E-10         | .                           | .                        | .                     | .                  | 0.5361301                | 8.52E-07              | .                    | .                 | .              |
| FAM81A   | .                 | .              | 0.3844043           | 0.0007212        | .                           | .                        | .                     | .                  | .                        | .                     | .                    | .                 | .              |
| FAM8A1   | .                 | .              | 0.3343537           | 0.0035965        | .                           | .                        | .                     | .                  | 0.5777952                | 7.04E-08              | .                    | .                 | .              |
| FAM96B   | .                 | .              | 0.4336395           | 0.0001136        | .                           | .                        | .                     | .                  | 0.5422606                | 6.03E-07              | .                    | .                 | .              |
| FAM98B   | .                 | .              | .                   | .                | .                           | .                        | .                     | .                  | 0.5267793                | 1.43E-06              | .                    | .                 | .              |
| FANCG    | .                 | .              | .                   | .                | .                           | .                        | .                     | .                  | .                        | .                     | 0.5107806            | 3.32E-06          | .              |
| FANCI    | .                 | .              | .                   | .                | .                           | .                        | .                     | .                  | 0.4877456                | 1.04E-05              | .                    | .                 | .              |
| FARP1    | .                 | .              | .                   | .                | .                           | .                        | .                     | .                  | .                        | .                     | .                    | .                 | yes            |
| FARSB    | .                 | .              | 0.4016213           | 0.0003902        | .                           | .                        | .                     | .                  | .                        | .                     | .                    | .                 | .              |
| FASN     | .                 | .              | .                   | .                | .                           | .                        | .                     | .                  | 0.3553748                | 0.0018893             | .                    | .                 | yes            |
| FASTK    | .                 | .              | .                   | .                | .                           | .                        | .                     | .                  | 0.5121938                | 3.09E-06              | .                    | .                 | .              |
| FASTKD2  | .                 | .              | 0.4152098           | 0.0002346        | .                           | .                        | .                     | .                  | .                        | .                     | .                    | .                 | .              |
| FASTKD3  | .                 | .              | .                   | .                | .                           | .                        | .                     | .                  | 0.515448                 | 2.61E-06              | .                    | .                 | .              |
| FAT1     | .                 | .              | .                   | .                | .                           | .                        | .                     | .                  | .                        | .                     | .                    | .                 | yes            |
| FBLIM1   | .                 | .              | .                   | .                | .                           | .                        | .                     | .                  | 0.8814432                | 3.70E-25              | .                    | .                 | .              |
| FBLN1    | .                 | .              | 0.4937668           | 7.81E-06         | .                           | .                        | .                     | .                  | .                        | .                     | .                    | .                 | yes            |
| FBLN2    | .                 | .              | 0.3753916           | 0.0009818        | .                           | .                        | .                     | .                  | .                        | .                     | .                    | .                 | .              |
| FBN2     | .                 | .              | 0.4558055           | 4.48E-05         | .                           | .                        | .                     | .                  | .                        | .                     | .                    | .                 | yes            |
| FBXL14   | .                 | .              | .                   | .                | .                           | .                        | .                     | .                  | 0.6784849                | 3.09E-11              | .                    | .                 | .              |
| FBXL17   | .                 | .              | .                   | .                | .                           | .                        | .                     | .                  | 0.614598                 | 5.72E-09              | .                    | .                 | .              |
| FBXL19   | .                 | .              | .                   | .                | 0.3227135                   | 0.005043                 | .                     | .                  | .                        | .                     | .                    | .                 | yes            |
| FBXL3    | .                 | .              | .                   | .                | .                           | .                        | .                     | .                  | 0.4664799                | 2.80E-05              | .                    | .                 | .              |
| FBXL5    | .                 | .              | .                   | .                | .                           | .                        | .                     | .                  | 0.4749123                | 1.91E-05              | .                    | .                 | .              |
| FBXL6    | .                 | .              | .                   | .                | .                           | .                        | .                     | .                  | 0.5987231                | 1.76E-08              | .                    | .                 | .              |
| FBXL8    | .                 | .              | 0.3997031           | 0.0004185        | .                           | .                        | .                     | .                  | .                        | .                     | .                    | .                 | .              |
| FBXO15   | .                 | .              | .                   | .                | .                           | .                        | .                     | .                  | 0.4931096                | 8.06E-06              | .                    | .                 | .              |
| FBXO18   | .                 | .              | 0.3871217           | 0.000656         | .                           | .                        | .                     | .                  | .                        | .                     | .                    | .                 | .              |
| FBXO21   | .                 | .              | .                   | .                | .                           | .                        | .                     | .                  | 0.4707459                | 2.31E-05              | .                    | .                 | .              |
| FBXO27   | .                 | .              | .                   | .                | .                           | .                        | .                     | .                  | .                        | .                     | 0.5478427            | 4.37E-07          | .              |
| FBXO39   | .                 | .              | .                   | .                | .                           | .                        | .                     | .                  | .                        | .                     | 0.7885339            | 7.41E-17          | .              |
| FBXW7    | .                 | .              | .                   | .                | .                           | .                        | .                     | .                  | 0.4765669                | 1.77E-05              | .                    | .                 | .              |
| FBXW8    | .                 | .              | 0.3872033           | 0.0006541        | .                           | .                        | .                     | .                  | 0.539442                 | 7.08E-07              | .                    | .                 | yes            |
| FCGR1A   | .                 | .              | .                   | .                | .                           | .                        | .                     | .                  | .                        | .                     | 0.4609944            | 3.57E-05          | .              |
| FCRLA    | .                 | .              | .                   | .                | .                           | .                        | .                     | .                  | .                        | .                     | 0.6714725            | 5.83E-11          | .              |
| FDFT1    | .                 | .              | .                   | .                | .                           | .                        | .                     | .                  | 0.5428815                | 5.82E-07              | .                    | .                 | .              |
| FECH     | .                 | .              | 0.4883196           | 1.02E-05         | .                           | .                        | .                     | .                  | .                        | .                     | .                    | .                 | .              |
| FEM1B    | .                 | .              | .                   | .                | .                           | .                        | .                     | .                  | 0.3398248                | 0.0030544             | .                    | .                 | yes            |
| FERMT2   | 0.4597358         | 3.78E-05       | .                   | .                | .                           | .                        | .                     | .                  | .                        | .                     | .                    | .                 | .              |
| FFAR4    | 0.4620292         | 3.41E-05       | .                   | .                | .                           | .                        | .                     | .                  | .                        | .                     | .                    | .                 | .              |
| FGD5     | .                 | .              | .                   | .                | .                           | .                        | .                     | .                  | 0.511514                 | 3.20E-06              | .                    | .                 | .              |
| FGF11    | .                 | .              | .                   | .                | .                           | .                        | 0.3742182             | 0.0010214          | 0.4996559                | 5.84E-06              | .                    | .                 | .              |
| FGF12    | .                 | .              | .                   | .                | .                           | .                        | .                     | .                  | .                        | .                     | 0.5734831            | 9.26E-08          | .              |
| FGFR1    | .                 | .              | .                   | .                | .                           | .                        | .                     | .                  | .                        | .                     | .                    | .                 | yes            |
| FGFRL1   | .                 | .              | .                   | .                | .                           | .                        | .                     | .                  | 0.6293678                | 1.90E-09              | .                    | .                 | .              |
| FGL2     | .                 | .              | 0.47374             | 2.01E-05         | .                           | .                        | .                     | .                  | .                        | .                     | .                    | .                 | .              |
| FHL2     | .                 | .              | 0.6904115           | 1.01E-11         | .                           | .                        | .                     | .                  | .                        | .                     | .                    | .                 | .              |
| FIGN     | .                 | .              | .                   | .                | 0.5978837                   | 1.86E-08                 | .                     | .                  | .                        | .                     | .                    | .                 | .              |
| FIGNL2   | .                 | .              | .                   | .                | 0.5369408                   | 8.15E-07                 | .                     | .                  | .                        | .                     | .                    | .                 | .              |
| FITM1    | .                 | .              | 0.4994303           | 5.90E-06         | .                           | .                        | .                     | .                  | 0.5023281                | 5.11E-06              | .                    | .                 | .              |
| FITM2    | .                 | .              | .                   | .                | .                           | .                        | .                     | .                  | 0.5898141                | 3.21E-08              | .                    | .                 | .              |
| FKBP14   | .                 | .              | .                   | .                | .                           | .                        | .                     | .                  | 0.4783221                | 1.63E-05              | .                    | .                 | .              |
| FKBP15   | .                 | .              | .                   | .                | .                           | .                        | .                     | .                  | .                        | .                     | 0.6948544            | 6.53E-12          | .              |
| FKBP1A   | .                 | .              | 0.4957505           | 7.08E-06         | .                           | .                        | .                     | .                  | .                        | .                     | .                    | .                 | yes            |
| FKBP3    | .                 | .              | .                   | .                | .                           | .                        | .                     | .                  | .                        | .                     | .                    | .                 | yes            |
| FKBP4    | .                 | .              | .                   | .                | .                           | .                        | .                     | .                  | 0.5517192                | 3.49E-07              | .                    | .                 | yes            |
| FKBP8    | .                 | .              | .                   | .                | .                           | .                        | .                     | .                  | .                        | .                     | .                    | .                 | yes            |
| FKBP9    | .                 | .              | .                   | .                | .                           | .                        | .                     | .                  | .                        | .                     | .                    | .                 | yes            |
| FL11     | .                 | .              | .                   | .                | 0.6257285                   | 2.51E-09                 | .                     | .                  | .                        | .                     | .                    | .                 | .              |
| FLJ22184 | .                 | .              | .                   | .                | .                           | .                        | .                     | .                  | .                        | .                     | 0.4606583            | 3.63E-05          | .              |





| Gene     | Atrial Expression | P-value Atrial | AV-Canal Expression | P-value AV-Canal | Branchial Arches Expression | P-value Branchial Arches | Heart Tube Expression | P-value Heart Tube | Outflow Tract Expression | P-value Outflow Tract | Ventricle Expression | P-value Ventricle | DMP Expression |
|----------|-------------------|----------------|---------------------|------------------|-----------------------------|--------------------------|-----------------------|--------------------|--------------------------|-----------------------|----------------------|-------------------|----------------|
| GD11     | .                 | .              | .                   | .                | .                           | .                        | .                     | 0.5031024          | 4.91E-06                 | .                     | .                    | .                 | .              |
| GD12     | .                 | .              | 0.3525248           | 0.0020669        | .                           | .                        | .                     | .                  | .                        | .                     | .                    | .                 | yes            |
| GDPGP1   | .                 | .              | .                   | .                | .                           | .                        | .                     | 0.6456177          | 5.28E-10                 | .                     | .                    | .                 | .              |
| GEM      | .                 | .              | 0.3941071           | 0.0005123        | .                           | .                        | .                     | 0.6217498          | 3.38E-09                 | .                     | .                    | .                 | .              |
| GEMIN6   | .                 | .              | .                   | .                | .                           | .                        | .                     | 0.5091966          | 3.61E-06                 | .                     | .                    | .                 | .              |
| GFER     | .                 | .              | .                   | .                | 0.482891                    | 1.32E-05                 | .                     | .                  | .                        | .                     | .                    | .                 | .              |
| GF11     | .                 | .              | .                   | .                | .                           | .                        | .                     | .                  | .                        | 0.5365409             | 8.33E-07             | .                 | .              |
| GFM1     | .                 | .              | 0.5446109           | 5.27E-07         | .                           | .                        | .                     | 0.5568278          | 2.58E-07                 | .                     | .                    | .                 | .              |
| GFOD1    | .                 | .              | 0.3864933           | 0.0006706        | .                           | .                        | .                     | 0.3964884          | 0.0004702                | .                     | .                    | .                 | .              |
| GFPT2    | .                 | .              | 0.5821381           | 5.32E-08         | .                           | .                        | .                     | .                  | .                        | .                     | .                    | .                 | .              |
| GFRA1    | .                 | .              | .                   | .                | .                           | .                        | .                     | .                  | .                        | 0.7027339             | 2.98E-12             | .                 | .              |
| GGA2     | .                 | .              | .                   | .                | .                           | .                        | .                     | .                  | .                        | .                     | .                    | .                 | yes            |
| GGCX     | .                 | .              | .                   | .                | .                           | .                        | .                     | 0.8273446          | 1.04E-19                 | .                     | .                    | .                 | .              |
| GHDC     | .                 | .              | .                   | .                | .                           | .                        | .                     | 0.4693997          | 2.46E-05                 | .                     | .                    | .                 | .              |
| GHITM    | .                 | .              | 0.5407884           | 6.56E-07         | .                           | .                        | .                     | 0.3457382          | 0.0025516                | .                     | .                    | .                 | yes            |
| GID4     | .                 | .              | 0.2987719           | 0.0097174        | .                           | .                        | .                     | 0.5570612          | 2.54E-07                 | .                     | .                    | .                 | .              |
| GID8     | .                 | .              | 0.409611            | 0.0002901        | .                           | .                        | .                     | .                  | .                        | .                     | .                    | .                 | .              |
| GIMAP5   | .                 | .              | 0.3859861           | 0.0006826        | .                           | .                        | .                     | .                  | .                        | .                     | .                    | .                 | .              |
| GINS1    | .                 | .              | .                   | .                | .                           | .                        | 0.4390752             | 9.10E-05           | .                        | .                     | .                    | .                 | .              |
| GIT2     | .                 | .              | .                   | .                | .                           | .                        | .                     | 0.4656449          | 2.91E-05                 | .                     | .                    | .                 | .              |
| GJA1     | .                 | .              | .                   | .                | 0.5275587                   | 1.37E-06                 | .                     | .                  | .                        | .                     | .                    | .                 | yes            |
| GJA4     | .                 | .              | .                   | .                | .                           | .                        | .                     | 0.7995115          | 1.34E-17                 | .                     | .                    | .                 | .              |
| GJA5     | .                 | .              | .                   | .                | .                           | .                        | .                     | 0.4903597          | 9.21E-06                 | 0.4909874             | 8.94E-06             | .                 | .              |
| GJC3     | .                 | .              | 0.4079904           | 0.0003082        | .                           | .                        | .                     | .                  | .                        | .                     | .                    | .                 | .              |
| GLDC     | .                 | .              | .                   | .                | .                           | .                        | .                     | 0.5430765          | 5.76E-07                 | .                     | .                    | .                 | .              |
| GLE1     | .                 | .              | .                   | .                | .                           | .                        | .                     | 0.555311           | 2.82E-07                 | .                     | .                    | .                 | .              |
| GLIPR1L2 | .                 | .              | 0.5119748           | 3.12E-06         | .                           | .                        | .                     | .                  | .                        | .                     | .                    | .                 | .              |
| GLIPR2   | .                 | .              | 0.418495            | 0.0002068        | .                           | .                        | .                     | 0.7270758          | 2.22E-13                 | .                     | .                    | .                 | .              |
| GLMN     | .                 | .              | .                   | .                | .                           | .                        | .                     | 0.4879788          | 1.03E-05                 | .                     | .                    | .                 | .              |
| GLO1     | .                 | .              | 0.3437339           | 0.002713         | .                           | .                        | .                     | 0.5215727          | 1.89E-06                 | .                     | .                    | .                 | .              |
| GLRA4    | .                 | .              | .                   | .                | .                           | .                        | 0.4663949             | 2.81E-05           | .                        | .                     | .                    | .                 | .              |
| GLRX5    | .                 | .              | .                   | .                | .                           | .                        | .                     | 0.7576747          | 5.55E-15                 | .                     | .                    | .                 | .              |
| GLT8D1   | .                 | .              | 0.4535626           | 4.94E-05         | .                           | .                        | .                     | .                  | .                        | .                     | .                    | .                 | .              |
| GLTSCR2  | .                 | .              | .                   | .                | .                           | .                        | .                     | 0.5064795          | 4.14E-06                 | .                     | .                    | .                 | .              |
| GLYR1    | .                 | .              | .                   | .                | .                           | .                        | .                     | .                  | .                        | .                     | .                    | .                 | yes            |
| GM2A     | .                 | .              | 0.3922692           | 0.000547         | .                           | .                        | .                     | 0.3730876          | 0.0010609                | .                     | .                    | .                 | .              |
| GMFB     | .                 | .              | .                   | .                | .                           | .                        | .                     | .                  | .                        | .                     | .                    | .                 | yes            |
| GMPPB    | .                 | .              | 0.4480964           | 6.24E-05         | .                           | .                        | .                     | 0.3481839          | 0.0023663                | .                     | .                    | .                 | .              |
| GMPR     | .                 | .              | 0.4546706           | 4.71E-05         | .                           | .                        | .                     | 0.537517           | 7.89E-07                 | .                     | .                    | .                 | .              |
| GNA11    | .                 | .              | .                   | .                | .                           | .                        | .                     | 0.6222821          | 3.25E-09                 | .                     | .                    | .                 | .              |
| GNA12    | .                 | .              | .                   | .                | .                           | .                        | .                     | .                  | .                        | 0.6013407             | 1.47E-08             | .                 | .              |
| GNAI2    | .                 | .              | .                   | .                | .                           | .                        | .                     | .                  | .                        | .                     | .                    | .                 | yes            |
| GNAI3    | .                 | .              | 0.5005004           | 5.60E-06         | .                           | .                        | .                     | .                  | .                        | .                     | .                    | .                 | yes            |
| GNAO1    | .                 | .              | 0.3774046           | 0.0009172        | .                           | .                        | .                     | .                  | .                        | .                     | .                    | .                 | .              |
| GNAT2    | 0.5688654         | 1.24E-07       | .                   | .                | .                           | .                        | .                     | .                  | .                        | .                     | .                    | .                 | .              |
| GNB1     | .                 | .              | .                   | .                | .                           | .                        | .                     | 0.5761537          | 7.82E-08                 | .                     | .                    | .                 | yes            |
| GNB2     | .                 | .              | 0.3767466           | 0.0009379        | .                           | .                        | .                     | .                  | .                        | .                     | .                    | .                 | yes            |
| GNB2L1   | .                 | .              | .                   | .                | .                           | .                        | .                     | 0.4255143          | 0.0001572                | .                     | .                    | .                 | yes            |
| GNB3     | .                 | .              | 0.5453878           | 5.04E-07         | .                           | .                        | .                     | .                  | .                        | .                     | .                    | .                 | .              |
| GNB4     | .                 | .              | 0.5857147           | 4.21E-08         | .                           | .                        | .                     | 0.5003882          | 5.63E-06                 | .                     | .                    | .                 | .              |
| NG7      | .                 | .              | .                   | .                | .                           | .                        | .                     | 0.4848875          | 1.20E-05                 | .                     | .                    | .                 | .              |
| GNPAT    | .                 | .              | 0.3551003           | 0.0019058        | .                           | .                        | 0.3076024             | 0.0076755          | 0.5090061                | 3.64E-06              | .                    | .                 | yes            |
| GNPDA2   | .                 | .              | 0.4353343           | 0.000106         | .                           | .                        | .                     | .                  | .                        | .                     | .                    | .                 | .              |
| GNPTAB   | .                 | .              | .                   | .                | .                           | .                        | .                     | 0.6861625          | 1.51E-11                 | .                     | .                    | .                 | .              |
| GNS      | .                 | .              | .                   | .                | .                           | .                        | .                     | 0.4508636          | 5.55E-05                 | .                     | .                    | .                 | .              |
| GOLGA2   | .                 | .              | .                   | .                | .                           | .                        | .                     | 0.6099368          | 8.00E-09                 | .                     | .                    | .                 | .              |
| GOLGA4   | .                 | .              | 0.3882567           | 0.0006304        | .                           | .                        | .                     | .                  | .                        | .                     | .                    | .                 | .              |
| GOLGA7   | .                 | .              | .                   | .                | .                           | .                        | .                     | 0.4743719          | 1.96E-05                 | .                     | .                    | .                 | .              |
| GOLIM4   | .                 | .              | 0.5332095           | 1.00E-06         | .                           | .                        | .                     | .                  | .                        | .                     | .                    | .                 | .              |
| GOLM1    | .                 | .              | .                   | .                | .                           | .                        | .                     | .                  | .                        | .                     | .                    | .                 | yes            |
| GON4L    | .                 | .              | .                   | .                | .                           | .                        | .                     | 0.5539132          | 3.06E-07                 | .                     | .                    | .                 | .              |
| GOPC     | .                 | .              | .                   | .                | .                           | .                        | 0.5323924             | 1.05E-06           | .                        | .                     | .                    | .                 | .              |
| GORASP2  | .                 | .              | .                   | .                | .                           | .                        | .                     | 0.6749131          | 4.28E-11                 | .                     | .                    | .                 | .              |
| GOT1L1   | 0.5554206         | 2.80E-07       | .                   | .                | .                           | .                        | .                     | .                  | .                        | .                     | .                    | .                 | .              |
| GOT2     | .                 | .              | .                   | .                | .                           | .                        | .                     | 0.5305246          | 1.16E-06                 | .                     | .                    | .                 | .              |
| GPATCH2L | .                 | .              | 0.4541733           | 4.81E-05         | .                           | .                        | .                     | .                  | .                        | .                     | .                    | .                 | .              |
| GPC1     | .                 | .              | .                   | .                | 0.3534436                   | 0.0020081                | .                     | .                  | .                        | .                     | .                    | .                 | yes            |
| GPC3     | .                 | .              | .                   | .                | .                           | .                        | .                     | 0.4911221          | 8.88E-06                 | .                     | .                    | .                 | yes            |
| GPD2     | .                 | .              | 0.4030293           | 0.0003705        | .                           | .                        | .                     | .                  | .                        | .                     | .                    | .                 | .              |
| GPI      | .                 | .              | .                   | .                | .                           | .                        | .                     | .                  | .                        | .                     | .                    | .                 | yes            |
| GNP3     | .                 | .              | .                   | .                | .                           | .                        | .                     | 0.5327669          | 1.03E-06                 | .                     | .                    | .                 | .              |
| GPR101   | .                 | .              | .                   | .                | .                           | .                        | .                     | 0.4727998          | 2.10E-05                 | .                     | .                    | .                 | .              |
| GPR107   | .                 | .              | 0.3370341           | 0.003321         | .                           | .                        | .                     | 0.5258882          | 1.50E-06                 | .                     | .                    | .                 | .              |
| GPR113   | .                 | .              | .                   | .                | .                           | .                        | .                     | .                  | .                        | 0.848151              | 1.49E-21             | .                 | .              |
| GPR114   | .                 | .              | .                   | .                | .                           | .                        | .                     | .                  | .                        | 0.5086062             | 3.72E-06             | .                 | .              |

| Gene     | Atrial Expression | P-value Atrial | AV-Canal Expression | P-value AV-Canal | Branchial Arches Expression | P-value Branchial Arches | Heart Tube Expression | P-value Heart Tube | Outflow Tract Expression | P-value Outflow Tract | Ventricle Expression | P-value Ventricle | DMP Expression |
|----------|-------------------|----------------|---------------------|------------------|-----------------------------|--------------------------|-----------------------|--------------------|--------------------------|-----------------------|----------------------|-------------------|----------------|
| GPR124   | .                 | .              | .                   | .                | .                           | .                        | .                     | 0.6300236          | 1.81E-09                 | .                     | .                    | .                 | yes            |
| GPR125   | .                 | .              | 0.520262            | 2.02E-06         | .                           | .                        | .                     | 0.4463418          | 6.72E-05                 | .                     | .                    | .                 | yes            |
| GPR126   | .                 | .              | .                   | .                | .                           | .                        | .                     | 0.7295459          | 1.68E-13                 | .                     | .                    | .                 | .              |
| GPR171   | .                 | .              | .                   | .                | .                           | .                        | .                     | .                  | .                        | 0.4771104             | 1.72E-05             | .                 | .              |
| GPR180   | .                 | .              | .                   | .                | .                           | .                        | .                     | 0.5609434          | 2.01E-07                 | .                     | .                    | .                 | .              |
| GPR182   | .                 | .              | 0.681591            | 2.32E-11         | .                           | .                        | .                     | .                  | .                        | .                     | .                    | .                 | .              |
| GPR22    | .                 | .              | .                   | .                | 0.4837304                   | 1.26E-05                 | .                     | .                  | .                        | .                     | .                    | .                 | .              |
| GPR4     | .                 | .              | .                   | .                | .                           | .                        | .                     | 0.6170911          | 4.77E-09                 | .                     | .                    | .                 | .              |
| GPR45    | .                 | .              | .                   | .                | .                           | .                        | .                     | .                  | .                        | 0.5428122             | 5.84E-07             | .                 | .              |
| GPR56    | .                 | .              | .                   | .                | .                           | .                        | .                     | .                  | .                        | 0.6170947             | 4.77E-09             | .                 | .              |
| GPR97    | .                 | .              | 0.3775639           | 0.0009122        | .                           | .                        | .                     | .                  | .                        | .                     | .                    | .                 | .              |
| GPSM1    | .                 | .              | .                   | .                | .                           | .                        | .                     | 0.6384285          | 9.39E-10                 | .                     | .                    | .                 | .              |
| GPX1     | .                 | .              | .                   | .                | .                           | .                        | .                     | .                  | .                        | .                     | .                    | .                 | yes            |
| GPX3     | .                 | .              | .                   | .                | .                           | .                        | .                     | 0.3025292          | 0.0087969                | .                     | .                    | .                 | yes            |
| GPX4     | .                 | .              | .                   | .                | .                           | .                        | .                     | 0.6297233          | 1.85E-09                 | .                     | .                    | .                 | .              |
| GPX7     | .                 | .              | 0.3989072           | 0.0004308        | .                           | .                        | .                     | 0.4224836          | 0.0001771                | .                     | .                    | .                 | .              |
| GRAP2    | .                 | .              | 0.4013427           | 0.0003942        | .                           | .                        | .                     | .                  | .                        | .                     | .                    | .                 | .              |
| GRASP    | .                 | .              | .                   | .                | .                           | .                        | .                     | 0.5382238          | 7.58E-07                 | .                     | .                    | .                 | .              |
| GRB10    | .                 | .              | .                   | .                | .                           | .                        | .                     | 0.4608462          | 3.60E-05                 | .                     | .                    | .                 | yes            |
| GRB14    | .                 | .              | .                   | .                | .                           | 0.4430555                | 7.71E-05              | .                  | .                        | .                     | .                    | .                 | .              |
| GREB1    | .                 | .              | .                   | .                | .                           | .                        | .                     | 0.5428846          | 5.82E-07                 | 0.2986335             | 0.0097528            | .                 | .              |
| GRHL1    | .                 | .              | .                   | .                | .                           | .                        | .                     | .                  | .                        | 0.6748756             | 4.29E-11             | .                 | .              |
| GRHRP    | .                 | .              | 0.3735667           | 0.001044         | .                           | .                        | .                     | 0.4748366          | 1.92E-05                 | .                     | .                    | .                 | .              |
| GRID1    | .                 | .              | .                   | .                | .                           | .                        | .                     | 0.5433673          | 5.66E-07                 | .                     | .                    | .                 | .              |
| GRIN2C   | .                 | .              | .                   | .                | .                           | .                        | .                     | .                  | .                        | 0.668363              | 7.69E-11             | .                 | .              |
| GRPEL1   | .                 | .              | .                   | .                | .                           | .                        | .                     | 0.498405           | 6.21E-06                 | .                     | .                    | .                 | .              |
| GSK3B    | .                 | .              | 0.3727962           | 0.0010713        | .                           | .                        | .                     | .                  | .                        | .                     | .                    | .                 | yes            |
| GSPT1    | .                 | .              | .                   | .                | 0.6325122                   | 1.49E-09                 | .                     | .                  | 0.3565626                | 0.0018194             | .                    | .                 | yes            |
| GSR      | .                 | .              | .                   | .                | .                           | .                        | .                     | 0.6083176          | 8.98E-09                 | .                     | .                    | .                 | .              |
| GSTCD    | .                 | .              | .                   | .                | .                           | .                        | .                     | .                  | .                        | 0.6704771             | 6.38E-11             | .                 | .              |
| GSTO2    | .                 | .              | .                   | .                | .                           | .                        | .                     | 0.4595246          | 3.81E-05                 | .                     | .                    | .                 | .              |
| GTF2A2   | .                 | .              | 0.7113468           | 1.22E-12         | .                           | .                        | .                     | .                  | .                        | .                     | .                    | .                 | .              |
| GTF2E2   | .                 | .              | 0.4896096           | 9.55E-06         | .                           | .                        | .                     | .                  | .                        | .                     | .                    | .                 | .              |
| GTF2H4   | .                 | .              | 0.4643577           | 3.08E-05         | .                           | .                        | .                     | .                  | .                        | .                     | .                    | .                 | .              |
| GTF2I    | .                 | .              | .                   | .                | 0.3678097                   | 0.0012643                | .                     | .                  | .                        | .                     | .                    | .                 | yes            |
| GTF2IRD1 | .                 | .              | .                   | .                | .                           | 0.5570546                | 2.54E-07              | .                  | .                        | .                     | .                    | .                 | .              |
| GTF3C1   | .                 | .              | .                   | .                | .                           | .                        | .                     | .                  | .                        | .                     | .                    | .                 | yes            |
| GTF3C2   | .                 | .              | .                   | .                | .                           | .                        | .                     | .                  | .                        | .                     | .                    | .                 | yes            |
| GTPBP10  | .                 | .              | .                   | .                | .                           | .                        | .                     | 0.542931           | 5.80E-07                 | .                     | .                    | .                 | .              |
| GTPBP4   | .                 | .              | .                   | .                | .                           | .                        | .                     | 0.6434466          | 6.29E-10                 | .                     | .                    | .                 | .              |
| GTPBP8   | .                 | .              | .                   | .                | .                           | .                        | .                     | 0.4579491          | 4.09E-05                 | .                     | .                    | .                 | .              |
| GUCD1    | .                 | .              | .                   | .                | .                           | .                        | .                     | 0.4947342          | 7.44E-06                 | .                     | .                    | .                 | .              |
| GXYLT1   | .                 | .              | 0.4117664           | 0.0002674        | .                           | .                        | .                     | .                  | .                        | .                     | .                    | .                 | .              |
| GYG1     | .                 | .              | 0.3854004           | 0.0006966        | .                           | .                        | .                     | .                  | .                        | .                     | .                    | .                 | .              |
| GYS1     | .                 | .              | 0.503616            | 4.79E-06         | .                           | .                        | .                     | 0.4264378          | 0.0001516                | .                     | .                    | .                 | .              |
| H1FO     | .                 | .              | 0.3770317           | 0.0009288        | .                           | .                        | .                     | 0.428345           | 0.0001405                | .                     | .                    | .                 | yes            |
| H1FX     | .                 | .              | .                   | .                | 0.4730985                   | 2.07E-05                 | .                     | 0.5219988          | 1.84E-06                 | .                     | .                    | .                 | .              |
| H2AFX    | .                 | .              | .                   | .                | .                           | .                        | .                     | .                  | .                        | .                     | .                    | .                 | yes            |
| H2AFY    | .                 | .              | .                   | .                | .                           | .                        | .                     | .                  | .                        | .                     | .                    | .                 | yes            |
| H2AFY2   | .                 | .              | .                   | .                | .                           | .                        | .                     | .                  | .                        | .                     | .                    | .                 | yes            |
| H6PD     | .                 | .              | 0.3937422           | 0.000519         | .                           | .                        | .                     | .                  | .                        | .                     | .                    | .                 | .              |
| HADHA    | .                 | .              | 0.493705            | 7.83E-06         | .                           | .                        | .                     | 0.3390718          | 0.0031244                | .                     | .                    | .                 | .              |
| HADHB    | .                 | .              | .                   | .                | .                           | .                        | .                     | 0.5151554          | 2.65E-06                 | .                     | .                    | .                 | .              |
| HAND1    | .                 | .              | .                   | .                | .                           | 0.4453913                | 7.00E-05              | 0.5926391          | 2.66E-08                 | .                     | .                    | .                 | .              |
| HAND2    | .                 | .              | 0.4507957           | 5.56E-05         | .                           | .                        | .                     | 0.6694526          | 6.99E-11                 | .                     | .                    | .                 | .              |
| HAPLN1   | .                 | .              | 0.7314722           | 1.35E-13         | .                           | .                        | .                     | 0.4001859          | 0.0004112                | .                     | .                    | .                 | .              |
| HARS     | .                 | .              | .                   | .                | .                           | .                        | .                     | 0.7816186          | 2.07E-16                 | .                     | .                    | .                 | .              |
| HAS2     | .                 | .              | 0.4327464           | 0.0001178        | .                           | .                        | .                     | 0.7443907          | 2.93E-14                 | .                     | .                    | .                 | .              |
| HAUS2    | .                 | .              | .                   | .                | .                           | .                        | .                     | 0.5075168          | 3.93E-06                 | .                     | .                    | .                 | .              |
| HAUS4    | .                 | .              | .                   | .                | .                           | .                        | .                     | 0.7729152          | 7.17E-16                 | .                     | .                    | .                 | .              |
| HAUS8    | .                 | .              | 0.4298325           | 0.0001324        | .                           | .                        | .                     | 0.3034161          | 0.0085911                | .                     | .                    | .                 | .              |
| HBEGF    | .                 | .              | .                   | .                | .                           | 0.6039365                | 1.22E-08              | 0.3173907          | 0.0058612                | .                     | .                    | .                 | .              |
| HBG1     | .                 | .              | 0.5699662           | 1.16E-07         | .                           | .                        | .                     | .                  | .                        | .                     | .                    | .                 | yes            |
| HBG2     | .                 | .              | .                   | .                | .                           | .                        | .                     | .                  | .                        | .                     | .                    | .                 | yes            |
| HBS1L    | .                 | .              | .                   | .                | .                           | .                        | .                     | 0.4913169          | 8.79E-06                 | .                     | .                    | .                 | .              |
| HBZ      | .                 | .              | 0.4411498           | 8.35E-05         | .                           | .                        | .                     | .                  | .                        | .                     | .                    | .                 | yes            |
| HCFC1    | .                 | .              | 0.4056916           | 0.0003358        | .                           | .                        | .                     | .                  | .                        | .                     | .                    | .                 | yes            |
| HCFC1R1  | .                 | .              | 0.3733288           | 0.0010524        | .                           | .                        | .                     | 0.8105859          | 2.13E-18                 | .                     | .                    | .                 | .              |
| HCN4     | .                 | .              | .                   | .                | .                           | .                        | .                     | .                  | .                        | 0.4493895             | 5.91E-05             | .                 | .              |
| HDAC10   | .                 | .              | 0.5434424           | 5.64E-07         | .                           | .                        | .                     | .                  | .                        | .                     | .                    | .                 | .              |
| HDAC2    | .                 | .              | .                   | .                | .                           | .                        | .                     | .                  | .                        | .                     | .                    | .                 | yes            |
| HDAC3    | .                 | .              | .                   | .                | 0.5831153                   | 4.99E-08                 | .                     | .                  | .                        | .                     | .                    | .                 | .              |
| HDAC5    | .                 | .              | .                   | .                | .                           | .                        | .                     | 0.6881054          | 1.25E-11                 | .                     | .                    | .                 | .              |
| HDAC6    | .                 | .              | 0.3910157           | 0.0005719        | .                           | .                        | .                     | .                  | .                        | .                     | .                    | .                 | .              |
| HDAC8    | .                 | .              | .                   | .                | .                           | .                        | .                     | .                  | .                        | 0.6851892             | 1.65E-11             | .                 | .              |

| Gene      | Atrial Expression | P-value Atrial | AV-Canal Expression | P-value AV-Canal | Branchial Arches Expression | P-value Branchial Arches | Heart Tube Expression | P-value Heart Tube | Outflow Tract Expression | P-value Outflow Tract | Ventricle Expression | P-value Ventricle | DMP Expression |
|-----------|-------------------|----------------|---------------------|------------------|-----------------------------|--------------------------|-----------------------|--------------------|--------------------------|-----------------------|----------------------|-------------------|----------------|
| HDGF      | .                 | .              | .                   | .                | .                           | .                        | .                     | .                  | .                        | .                     | .                    | .                 | yes            |
| HDLBP     | .                 | .              | .                   | .                | .                           | .                        | .                     | .                  | .                        | .                     | .                    | .                 | yes            |
| HEATR1    | .                 | .              | .                   | .                | 0.4716584                   | 2.22E-05                 | .                     | .                  | .                        | .                     | .                    | .                 | .              |
| HEATR2    | .                 | .              | 0.3233892           | 0.0049467        | .                           | .                        | .                     | 0.5970636          | 1.97E-08                 | .                     | .                    | .                 | .              |
| HEATR5A   | .                 | .              | 0.5318414           | 1.08E-06         | .                           | .                        | .                     | .                  | .                        | .                     | .                    | .                 | .              |
| HEATR5B   | .                 | .              | 0.4505226           | 5.63E-05         | .                           | .                        | .                     | .                  | .                        | .                     | .                    | .                 | .              |
| HECTD1    | .                 | .              | .                   | .                | .                           | .                        | .                     | .                  | .                        | .                     | .                    | .                 | yes            |
| HEG1      | .                 | .              | 0.4497052           | 5.83E-05         | .                           | .                        | .                     | .                  | .                        | .                     | .                    | .                 | .              |
| HELT      | .                 | .              | .                   | .                | .                           | .                        | .                     | 0.4870532          | 1.08E-05                 | .                     | .                    | .                 | .              |
| HERC6     | .                 | .              | 0.4010821           | 0.000398         | .                           | .                        | .                     | .                  | .                        | .                     | .                    | .                 | .              |
| HERPUD2   | .                 | .              | .                   | .                | .                           | .                        | .                     | 0.5242738          | 1.63E-06                 | .                     | .                    | .                 | .              |
| HES7      | .                 | .              | .                   | .                | .                           | .                        | .                     | .                  | .                        | 0.4410544             | 8.38E-05             | .                 | .              |
| HESX1     | .                 | .              | 0.3867134           | 0.0006654        | .                           | .                        | .                     | .                  | .                        | .                     | .                    | .                 | .              |
| HEY2      | .                 | .              | 0.4556895           | 4.51E-05         | .                           | .                        | .                     | 0.694317           | 6.88E-12                 | .                     | .                    | .                 | .              |
| HGS       | .                 | .              | .                   | .                | .                           | .                        | .                     | 0.7464764          | 2.27E-14                 | .                     | .                    | .                 | .              |
| HIBADH    | .                 | .              | 0.4118756           | 0.0002663        | .                           | .                        | .                     | .                  | .                        | .                     | .                    | .                 | .              |
| HIF1A     | .                 | .              | 0.3451725           | 0.0025963        | .                           | .                        | .                     | 0.5003944          | 5.63E-06                 | .                     | .                    | .                 | yes            |
| HIF1AN    | .                 | .              | .                   | .                | .                           | .                        | .                     | 0.7179886          | 6.03E-13                 | .                     | .                    | .                 | .              |
| HIGD2A    | .                 | .              | 0.525262            | 1.55E-06         | .                           | .                        | .                     | 0.3955964          | 0.0004856                | .                     | .                    | .                 | .              |
| HINT3     | 0.5426443         | 5.90E-07       | .                   | .                | .                           | .                        | .                     | .                  | .                        | .                     | .                    | .                 | .              |
| HIP1      | .                 | .              | .                   | .                | .                           | .                        | .                     | 0.3800356          | 0.0008384                | 0.610784              | 7.53E-09             | .                 | yes            |
| HIPK3     | .                 | .              | .                   | .                | .                           | .                        | .                     | 0.6996566          | 4.06E-12                 | .                     | .                    | .                 | .              |
| HIST3H2A  | .                 | .              | 0.3811159           | 0.0008079        | .                           | .                        | .                     | .                  | .                        | .                     | .                    | .                 | .              |
| HK1       | .                 | .              | .                   | .                | .                           | .                        | .                     | 0.6813577          | 2.37E-11                 | .                     | .                    | .                 | .              |
| HK2       | .                 | .              | 0.3157462           | 0.0061366        | 0.4303374                   | 0.0001298                | .                     | .                  | .                        | .                     | .                    | .                 | yes            |
| HLA-DMA   | .                 | .              | 0.3909807           | 0.0005726        | .                           | .                        | .                     | .                  | .                        | .                     | .                    | .                 | .              |
| HLA-DOB   | .                 | .              | .                   | .                | .                           | .                        | .                     | .                  | .                        | 0.4764741             | 1.78E-05             | .                 | .              |
| HLCS      | .                 | .              | .                   | .                | .                           | .                        | .                     | .                  | .                        | 0.4978879             | 6.37E-06             | .                 | .              |
| HLTF      | .                 | .              | .                   | .                | .                           | .                        | .                     | 0.6550622          | 2.42E-10                 | .                     | .                    | .                 | .              |
| HM13      | .                 | .              | 0.4200525           | 0.0001947        | .                           | .                        | .                     | .                  | .                        | .                     | .                    | .                 | .              |
| HMCE5     | .                 | .              | .                   | .                | .                           | .                        | .                     | 0.4697349          | 2.42E-05                 | .                     | .                    | .                 | .              |
| HMG20B    | .                 | .              | 0.5822541           | 5.28E-08         | .                           | .                        | .                     | .                  | .                        | .                     | .                    | .                 | .              |
| HMGA2     | .                 | .              | .                   | .                | .                           | .                        | .                     | .                  | .                        | .                     | .                    | .                 | yes            |
| HMGCR     | .                 | .              | .                   | .                | .                           | .                        | .                     | .                  | .                        | .                     | .                    | .                 | yes            |
| HMGCS1    | .                 | .              | .                   | .                | .                           | .                        | .                     | .                  | .                        | .                     | .                    | .                 | yes            |
| HMGNT2    | .                 | .              | .                   | .                | .                           | .                        | 0.4897123             | 9.50E-06           | .                        | .                     | .                    | .                 | .              |
| HMX3      | .                 | .              | .                   | .                | .                           | .                        | .                     | .                  | .                        | .                     | .                    | .                 | .              |
| HN1L      | .                 | .              | 0.3115481           | 0.0068921        | .                           | .                        | .                     | 0.5125291          | 3.04E-06                 | .                     | .                    | .                 | .              |
| HNRNPA0   | .                 | .              | .                   | .                | 0.3945681                   | 0.0005039                | .                     | 0.5728836          | 9.62E-08                 | .                     | .                    | .                 | yes            |
| HNRNPA2B1 | .                 | .              | 0.4751073           | 1.89E-05         | .                           | .                        | .                     | .                  | .                        | .                     | .                    | .                 | yes            |
| HNRNPAB   | .                 | .              | .                   | .                | .                           | .                        | .                     | .                  | .                        | .                     | .                    | .                 | yes            |
| HNRNPC    | .                 | .              | .                   | .                | .                           | .                        | .                     | 0.4629764          | 3.27E-05                 | .                     | .                    | .                 | yes            |
| HNRNPD    | .                 | .              | .                   | .                | 0.3486032                   | 0.0023358                | .                     | .                  | .                        | .                     | .                    | .                 | yes            |
| HNRNPF    | .                 | .              | .                   | .                | .                           | .                        | .                     | 0.6018911          | 1.41E-08                 | .                     | .                    | .                 | .              |
| HNRNPH1   | .                 | .              | .                   | .                | .                           | .                        | .                     | 0.5744073          | 8.74E-08                 | .                     | .                    | .                 | yes            |
| HNRNPK    | .                 | .              | .                   | .                | 0.3407688                   | 0.0029686                | .                     | .                  | .                        | .                     | .                    | .                 | yes            |
| HNRNPL    | .                 | .              | .                   | .                | 0.4396155                   | 8.90E-05                 | .                     | .                  | .                        | .                     | .                    | .                 | yes            |
| HNRNPM    | .                 | .              | 0.3326497           | 0.0037819        | .                           | .                        | .                     | .                  | .                        | .                     | .                    | .                 | yes            |
| HNRNPR    | .                 | .              | .                   | .                | .                           | .                        | .                     | .                  | .                        | 0.6319833             | 1.55E-09             | .                 | .              |
| HNRNPU    | .                 | .              | 0.3004309           | 0.0093011        | 0.3509928                   | 0.0021685                | .                     | 0.55748            | 2.48E-07                 | .                     | .                    | .                 | yes            |
| HNRNPUL1  | .                 | .              | 0.3452718           | 0.0025884        | .                           | .                        | .                     | .                  | .                        | .                     | .                    | .                 | yes            |
| HNRNPUL2  | .                 | .              | .                   | .                | .                           | .                        | .                     | .                  | .                        | .                     | .                    | .                 | yes            |
| HOMER2    | .                 | .              | 0.3389572           | 0.0031352        | .                           | .                        | .                     | 0.487763           | 1.04E-05                 | .                     | .                    | .                 | .              |
| HOOK2     | .                 | .              | .                   | .                | .                           | .                        | .                     | 0.4526132          | 5.15E-05                 | .                     | .                    | .                 | .              |
| HOXA9     | .                 | .              | .                   | .                | .                           | .                        | .                     | .                  | .                        | 0.4732179             | 2.06E-05             | .                 | .              |
| HOXB1     | .                 | .              | 0.3964101           | 0.0004716        | .                           | .                        | .                     | .                  | .                        | .                     | .                    | .                 | .              |
| HOXC4     | .                 | .              | .                   | .                | .                           | .                        | .                     | .                  | .                        | 0.6930019             | 7.82E-12             | .                 | .              |
| HP1BP3    | .                 | .              | .                   | .                | .                           | .                        | .                     | .                  | .                        | .                     | .                    | .                 | yes            |
| HPRT1     | .                 | .              | 0.3520563           | 0.0020975        | .                           | .                        | .                     | 0.5088173          | 3.68E-06                 | .                     | .                    | .                 | .              |
| HRC       | .                 | .              | 0.3568101           | 0.0018052        | .                           | .                        | .                     | 0.6300615          | 1.80E-09                 | .                     | .                    | .                 | .              |
| HS1BP3    | .                 | .              | 0.5767918           | 7.51E-08         | .                           | .                        | .                     | .                  | .                        | .                     | .                    | .                 | .              |
| HS3ST1    | .                 | .              | 0.3770902           | 0.000927         | .                           | .                        | .                     | .                  | .                        | .                     | .                    | .                 | .              |
| HSBP1L1   | .                 | .              | 0.4019193           | 0.000386         | .                           | .                        | .                     | .                  | .                        | .                     | .                    | .                 | .              |
| HSD17B12  | .                 | .              | 0.4617445           | 3.46E-05         | .                           | .                        | .                     | .                  | .                        | .                     | .                    | .                 | .              |
| HSD17B4   | .                 | .              | 0.4921423           | 8.45E-06         | .                           | .                        | .                     | 0.3743934          | 0.0010154                | .                     | .                    | .                 | .              |
| HSDL2     | .                 | .              | 0.44407             | 7.39E-05         | .                           | .                        | .                     | .                  | .                        | .                     | .                    | .                 | .              |
| HSF1      | .                 | .              | .                   | .                | 0.5330179                   | 1.01E-06                 | .                     | .                  | .                        | .                     | .                    | .                 | .              |
| HSP90AA1  | .                 | .              | .                   | .                | .                           | .                        | .                     | .                  | .                        | .                     | .                    | .                 | yes            |
| HSP90AB1  | .                 | .              | .                   | .                | .                           | .                        | .                     | .                  | .                        | .                     | .                    | .                 | yes            |
| HSP90B1   | .                 | .              | .                   | .                | .                           | .                        | .                     | .                  | .                        | .                     | .                    | .                 | yes            |
| HSPA14    | .                 | .              | .                   | .                | .                           | .                        | .                     | 0.6439533          | 6.04E-10                 | .                     | .                    | .                 | .              |
| HSPA4     | .                 | .              | .                   | .                | .                           | .                        | .                     | 0.7036142          | 2.72E-12                 | .                     | .                    | .                 | yes            |
| HSPA5     | .                 | .              | .                   | .                | .                           | .                        | .                     | .                  | .                        | .                     | .                    | .                 | yes            |
| HSPA8     | .                 | .              | .                   | .                | 0.3264                      | 0.0045373                | .                     | .                  | .                        | .                     | .                    | .                 | yes            |
| HSPA9     | .                 | .              | 0.3648854           | 0.0013915        | .                           | .                        | .                     | 0.5725754          | 9.81E-08                 | .                     | .                    | .                 | yes            |













| Gene      | Atrial Expression | P-value Atrial | AV-Canal Expression | P-value AV-Canal | Branchial Arches Expression | P-value Branchial Arches | Heart Tube Expression | P-value Heart Tube | Outflow Tract Expression | P-value Outflow Tract | Ventricle Expression | P-value Ventricle | DMP Expression |
|-----------|-------------------|----------------|---------------------|------------------|-----------------------------|--------------------------|-----------------------|--------------------|--------------------------|-----------------------|----------------------|-------------------|----------------|
| MDGA1     | .                 | .              | .                   | .                | .                           | .                        | .                     | .                  | .                        | 0.7108719             | 1.29E-12             | .                 | .              |
| MDH1      | 0.3582315         | 0.0017252      | 0.385445            | 0.0006956        | .                           | .                        | .                     | .                  | .                        | .                     | .                    | .                 | yes            |
| MDH2      | .                 | .              | 0.5084106           | 3.75E-06         | .                           | .                        | .                     | 0.5493408          | 4.01E-07                 | .                     | .                    | .                 | yes            |
| MDK       | .                 | .              | .                   | .                | .                           | .                        | .                     | .                  | .                        | .                     | .                    | .                 | yes            |
| MDM2      | .                 | .              | 0.5118185           | 3.15E-06         | .                           | .                        | .                     | .                  | .                        | .                     | .                    | .                 | .              |
| MDN1      | .                 | .              | .                   | .                | .                           | .                        | .                     | .                  | .                        | .                     | .                    | .                 | yes            |
| MDP1      | .                 | .              | .                   | .                | .                           | .                        | .                     | 0.5896705          | 3.24E-08                 | .                     | .                    | .                 | .              |
| ME2       | .                 | .              | 0.4285812           | 0.0001392        | .                           | .                        | .                     | .                  | .                        | .                     | .                    | .                 | .              |
| MED12     | .                 | .              | .                   | .                | .                           | .                        | .                     | 0.68617            | 1.51E-11                 | .                     | .                    | .                 | .              |
| MED24     | .                 | .              | .                   | .                | .                           | .                        | .                     | 0.603914           | 1.22E-08                 | .                     | .                    | .                 | .              |
| MED28     | .                 | .              | .                   | .                | .                           | .                        | .                     | 0.6272271          | 2.24E-09                 | .                     | .                    | .                 | .              |
| MED7      | 0.4575524         | 4.16E-05       | .                   | .                | .                           | .                        | .                     | .                  | .                        | .                     | .                    | .                 | .              |
| MED8      | .                 | .              | .                   | .                | .                           | .                        | .                     | 0.5664893          | 1.43E-07                 | .                     | .                    | .                 | .              |
| MEDAG     | .                 | .              | .                   | .                | .                           | .                        | .                     | 0.6078618          | 9.27E-09                 | .                     | .                    | .                 | .              |
| MEF2A     | .                 | .              | 0.4725208           | 2.13E-05         | .                           | .                        | .                     | .                  | .                        | .                     | .                    | .                 | .              |
| MEF2BNB   | .                 | .              | 0.5864207           | 4.02E-08         | .                           | .                        | .                     | 0.4489508          | 6.02E-05                 | .                     | .                    | .                 | .              |
| MEIS1     | .                 | .              | .                   | .                | .                           | .                        | .                     | 0.4079496          | 0.0003087                | .                     | .                    | .                 | yes            |
| MEIS2     | .                 | .              | .                   | .                | .                           | .                        | .                     | .                  | .                        | .                     | .                    | .                 | yes            |
| MEOX1     | .                 | .              | 0.6409695           | 7.68E-10         | .                           | .                        | .                     | .                  | .                        | .                     | .                    | .                 | .              |
| MESP1     | .                 | .              | 0.4193713           | 0.0001999        | .                           | .                        | .                     | .                  | .                        | .                     | .                    | .                 | .              |
| MEST      | .                 | .              | .                   | .                | .                           | .                        | .                     | 0.3094538          | 0.0072987                | 0.4309974             | 0.0001264            | .                 | yes            |
| METRN     | .                 | .              | .                   | .                | .                           | .                        | .                     | .                  | .                        | .                     | .                    | .                 | yes            |
| METTL10   | .                 | .              | .                   | .                | .                           | .                        | .                     | .                  | .                        | 0.7019434             | 3.22E-12             | .                 | .              |
| METTL13   | .                 | .              | .                   | .                | .                           | .                        | .                     | .                  | .                        | 0.6437387             | 6.15E-10             | .                 | .              |
| METTL20   | .                 | .              | .                   | .                | .                           | .                        | .                     | 0.6358124          | 1.15E-09                 | .                     | .                    | .                 | .              |
| METTL21A  | .                 | .              | .                   | .                | .                           | .                        | .                     | 0.7462872          | 2.33E-14                 | .                     | .                    | .                 | .              |
| METTL22   | .                 | .              | 0.4904767           | 9.16E-06         | .                           | .                        | .                     | 0.6656643          | 9.75E-11                 | .                     | .                    | .                 | .              |
| METTL3    | .                 | .              | 0.3980797           | 0.000444         | .                           | .                        | .                     | .                  | .                        | .                     | .                    | .                 | .              |
| METTL4    | .                 | .              | .                   | .                | .                           | .                        | .                     | 0.57171            | 1.04E-07                 | .                     | .                    | .                 | .              |
| MEX3A     | .                 | .              | 0.4060597           | 0.0003312        | .                           | .                        | .                     | 0.3039496          | 0.0084693                | .                     | .                    | .                 | yes            |
| MFHAS1    | .                 | .              | .                   | .                | .                           | .                        | .                     | 0.5037361          | 4.76E-06                 | .                     | .                    | .                 | .              |
| MFN1      | .                 | .              | .                   | .                | .                           | .                        | .                     | 0.7212266          | 4.24E-13                 | .                     | .                    | .                 | .              |
| MFSD1     | .                 | .              | 0.4051035           | 0.0003432        | .                           | .                        | .                     | 0.382437           | 0.000772                 | .                     | .                    | .                 | .              |
| MFSD10    | .                 | .              | 0.4331229           | 0.000116         | .                           | .                        | .                     | .                  | .                        | .                     | .                    | .                 | .              |
| MFSD8     | .                 | .              | .                   | .                | .                           | .                        | .                     | 0.6279149          | 2.12E-09                 | .                     | .                    | .                 | .              |
| MFSD9     | .                 | .              | .                   | .                | .                           | .                        | .                     | .                  | .                        | 0.6956108             | 6.06E-12             | .                 | .              |
| MGAT4B    | .                 | .              | 0.3861599           | 0.0006784        | .                           | .                        | .                     | .                  | .                        | .                     | .                    | .                 | .              |
| MGEA5     | .                 | .              | .                   | .                | .                           | .                        | .                     | .                  | .                        | .                     | .                    | .                 | yes            |
| MGRN1     | .                 | .              | .                   | .                | .                           | .                        | .                     | .                  | .                        | 0.6502024             | 3.63E-10             | .                 | .              |
| MICAL2    | .                 | .              | 0.603775            | 1.24E-08         | .                           | .                        | .                     | 0.4924469          | 8.32E-06                 | .                     | .                    | .                 | .              |
| MICALL2   | .                 | .              | .                   | .                | 0.6102871                   | 7.80E-09                 | .                     | .                  | .                        | .                     | .                    | .                 | .              |
| MICU1     | .                 | .              | 0.4309863           | 0.0001264        | .                           | .                        | .                     | .                  | .                        | .                     | .                    | .                 | .              |
| MIDN      | .                 | .              | 0.3271572           | 0.0044391        | .                           | .                        | .                     | .                  | .                        | .                     | .                    | .                 | yes            |
| MIEF1     | .                 | .              | 0.4624143           | 3.36E-05         | .                           | .                        | .                     | .                  | .                        | .                     | .                    | .                 | .              |
| MIEF2     | .                 | .              | .                   | .                | .                           | .                        | .                     | 0.4539658          | 4.86E-05                 | .                     | .                    | .                 | .              |
| MIEN1     | .                 | .              | .                   | .                | .                           | .                        | .                     | 0.707157           | 1.89E-12                 | .                     | .                    | .                 | .              |
| MIER1     | .                 | .              | .                   | .                | .                           | .                        | .                     | .                  | .                        | 0.4437949             | 7.48E-05             | .                 | .              |
| MIF       | .                 | .              | 0.4001954           | 0.0004111        | .                           | .                        | .                     | 0.5230493          | 1.74E-06                 | .                     | .                    | .                 | .              |
| MINPP1    | .                 | .              | .                   | .                | .                           | .                        | .                     | 0.6347188          | 1.26E-09                 | .                     | .                    | .                 | .              |
| MIS18A    | .                 | .              | 0.4264622           | 0.0001514        | 0.4004667                   | 0.000407                 | .                     | 0.442289           | 7.96E-05                 | .                     | .                    | .                 | .              |
| MKI67     | .                 | .              | .                   | .                | .                           | .                        | .                     | .                  | .                        | .                     | .                    | .                 | yes            |
| MKKS      | .                 | .              | .                   | .                | .                           | .                        | .                     | 0.7560382          | 6.85E-15                 | .                     | .                    | .                 | .              |
| MKL2      | .                 | .              | 0.4610107           | 3.57E-05         | .                           | .                        | .                     | .                  | .                        | .                     | .                    | .                 | .              |
| MKNK2     | .                 | .              | .                   | .                | 0.432327                    | 0.0001198                | .                     | .                  | .                        | .                     | .                    | .                 | yes            |
| MKRN2     | .                 | .              | .                   | .                | .                           | .                        | .                     | 0.6611945          | 1.44E-10                 | .                     | .                    | .                 | .              |
| MLEC      | .                 | .              | 0.4087045           | 0.0003001        | .                           | .                        | .                     | 0.4993361          | 5.93E-06                 | .                     | .                    | .                 | yes            |
| MLF2      | .                 | .              | .                   | .                | .                           | .                        | .                     | 0.4383833          | 9.36E-05                 | .                     | .                    | .                 | yes            |
| MLLT1     | .                 | .              | .                   | .                | .                           | .                        | .                     | 0.4933258          | 7.98E-06                 | 0.3917473             | 0.0005572            | .                 | .              |
| MLLT4     | .                 | .              | .                   | .                | .                           | .                        | .                     | .                  | .                        | .                     | .                    | .                 | yes            |
| MMD       | .                 | .              | 0.4509025           | 5.54E-05         | .                           | .                        | .                     | 0.5154343          | 2.61E-06                 | .                     | .                    | .                 | .              |
| MMP24     | .                 | .              | .                   | .                | .                           | .                        | .                     | 0.4956876          | 7.10E-06                 | .                     | .                    | .                 | .              |
| MMP27     | .                 | .              | 0.3957455           | 0.000483         | .                           | .                        | .                     | .                  | .                        | .                     | .                    | .                 | .              |
| MMRN2     | .                 | .              | .                   | .                | .                           | .                        | .                     | 0.5337902          | 9.71E-07                 | .                     | .                    | .                 | .              |
| MNT       | .                 | .              | .                   | .                | 0.4489066                   | 6.03E-05                 | .                     | .                  | .                        | .                     | .                    | .                 | .              |
| MOB1B     | .                 | .              | 0.4854095           | 1.17E-05         | .                           | .                        | .                     | 0.4199669          | 0.0001953                | .                     | .                    | .                 | .              |
| MOB2      | .                 | .              | .                   | .                | .                           | .                        | .                     | 0.5461097          | 4.84E-07                 | .                     | .                    | .                 | .              |
| MOB3A     | .                 | .              | 0.369769            | 0.001185         | .                           | .                        | .                     | 0.563383           | 1.73E-07                 | .                     | .                    | .                 | .              |
| MOGAT2    | .                 | .              | .                   | .                | 0.6541637                   | 2.61E-10                 | .                     | .                  | .                        | .                     | .                    | .                 | .              |
| MORC2     | .                 | .              | .                   | .                | .                           | .                        | .                     | 0.6460698          | 5.09E-10                 | .                     | .                    | .                 | .              |
| MORC3     | .                 | .              | .                   | .                | .                           | .                        | .                     | .                  | .                        | 0.6935179             | 7.44E-12             | .                 | .              |
| MORF4L2   | .                 | .              | .                   | .                | 0.3715516                   | 0.0011168                | .                     | .                  | .                        | .                     | .                    | .                 | yes            |
| MOSPD1    | .                 | .              | .                   | .                | .                           | .                        | .                     | 0.514499           | 2.74E-06                 | .                     | .                    | .                 | .              |
| MOSPD2    | .                 | .              | .                   | .                | .                           | .                        | .                     | .                  | .                        | 0.5442411             | 5.39E-07             | .                 | .              |
| MOV10L1   | .                 | .              | .                   | .                | .                           | .                        | .                     | 0.8772545          | 1.20E-24                 | .                     | .                    | .                 | .              |
| MPHOSPH10 | .                 | .              | 0.3484163           | 0.0023494        | .                           | .                        | .                     | 0.588085           | 3.60E-08                 | .                     | .                    | .                 | .              |

| Gene     | Atrial Expression | P-value Atrial | AV-Canal Expression | P-value AV-Canal | Branchial Arches Expression | P-value Branchial Arches | Heart Tube Expression | P-value Heart Tube | Outflow Tract Expression | P-value Outflow Tract | Ventricle Expression | P-value Ventricle | DMP Expression |
|----------|-------------------|----------------|---------------------|------------------|-----------------------------|--------------------------|-----------------------|--------------------|--------------------------|-----------------------|----------------------|-------------------|----------------|
| MPHOSPH6 | .                 | .              | .                   | .                | .                           | .                        | .                     | 0.5203076          | 2.02E-06                 | .                     | .                    | .                 | .              |
| MPHOSPH8 | .                 | .              | .                   | .                | .                           | .                        | .                     | 0.5315834          | 1.10E-06                 | .                     | .                    | .                 | .              |
| MPO      | .                 | .              | .                   | .                | 0.5042505                   | 4.64E-06                 | .                     | .                  | .                        | .                     | .                    | .                 | .              |
| MPP2     | .                 | .              | .                   | .                | .                           | .                        | .                     | 0.7163535          | 7.20E-13                 | .                     | .                    | .                 | .              |
| MPP6     | .                 | .              | .                   | .                | .                           | .                        | .                     | 0.6039513          | 1.22E-08                 | .                     | .                    | .                 | .              |
| MPPE1    | .                 | .              | .                   | .                | .                           | .                        | .                     | 0.601094           | 1.49E-08                 | .                     | .                    | .                 | .              |
| MPPED2   | .                 | .              | .                   | .                | .                           | .                        | 0.4428121             | 7.79E-05           | 0.4546692                | 4.71E-05              | .                    | .                 | .              |
| MPRIP    | .                 | .              | .                   | .                | .                           | .                        | .                     | 0.5754377          | 8.18E-08                 | 0.3031564             | 0.0086509            | yes               | .              |
| MPZL1    | .                 | .              | .                   | .                | .                           | .                        | .                     | 0.6384351          | 9.39E-10                 | .                     | .                    | .                 | .              |
| MRE11A   | .                 | .              | .                   | .                | .                           | .                        | 0.5402141             | 6.77E-07           | .                        | .                     | .                    | .                 | .              |
| MRGBP    | .                 | .              | .                   | .                | .                           | .                        | .                     | 0.4797894          | 1.52E-05                 | .                     | .                    | .                 | .              |
| MRGPRE   | .                 | .              | .                   | .                | .                           | .                        | .                     | 0.4713428          | 2.25E-05                 | .                     | .                    | .                 | .              |
| MRM1     | .                 | .              | .                   | .                | .                           | .                        | .                     | 0.8146405          | 1.05E-18                 | .                     | .                    | .                 | .              |
| MROH8    | .                 | .              | .                   | .                | .                           | .                        | .                     | .                  | .                        | 0.4798839             | 1.52E-05             | .                 | .              |
| MRPL12   | .                 | .              | .                   | .                | .                           | .                        | .                     | 0.6205073          | 3.71E-09                 | .                     | .                    | .                 | .              |
| MRPL16   | .                 | 0.3913405      | 0.0005653           | .                | .                           | .                        | .                     | .                  | .                        | .                     | .                    | .                 | .              |
| MRPL17   | .                 | .              | .                   | .                | .                           | .                        | .                     | 0.5653303          | 1.54E-07                 | .                     | .                    | .                 | .              |
| MRPL3    | .                 | 0.4125832      | 0.0002593           | .                | .                           | .                        | .                     | 0.6035216          | 1.26E-08                 | .                     | .                    | .                 | .              |
| MRPL30   | .                 | 0.3216873      | 0.0051924           | .                | .                           | .                        | .                     | 0.5730246          | 9.53E-08                 | .                     | .                    | .                 | .              |
| MRPL34   | .                 | .              | .                   | .                | .                           | .                        | .                     | 0.7387362          | 5.78E-14                 | .                     | .                    | .                 | .              |
| MRPL36   | .                 | 0.3592706      | 0.0016687           | .                | .                           | .                        | .                     | 0.6632405          | 1.20E-10                 | .                     | .                    | .                 | .              |
| MRPL38   | .                 | .              | .                   | 0.346048         | 0.0025275                   | .                        | .                     | 0.5632843          | 1.74E-07                 | .                     | .                    | .                 | .              |
| MRPL44   | .                 | 0.3639521      | 0.0014345           | .                | .                           | .                        | .                     | 0.5044465          | 4.59E-06                 | .                     | .                    | .                 | .              |
| MRPL45   | .                 | 0.4158001      | 0.0002294           | 0.4020183        | 0.0003846                   | .                        | .                     | 0.4622837          | 3.38E-05                 | .                     | .                    | .                 | .              |
| MRPL52   | .                 | 0.3599122      | 0.0016347           | .                | .                           | .                        | .                     | 0.5190609          | 2.16E-06                 | .                     | .                    | .                 | .              |
| MRPL55   | .                 | .              | .                   | .                | .                           | .                        | .                     | 0.6500299          | 3.68E-10                 | .                     | .                    | .                 | .              |
| MRPL9    | .                 | .              | .                   | .                | .                           | .                        | .                     | 0.5023564          | 5.10E-06                 | .                     | .                    | .                 | .              |
| MRPS11   | .                 | 0.443646       | 7.53E-05            | .                | .                           | .                        | .                     | .                  | .                        | .                     | .                    | .                 | .              |
| MRPS22   | .                 | .              | .                   | .                | .                           | .                        | .                     | 0.4684367          | 2.56E-05                 | .                     | .                    | .                 | .              |
| MRPS23   | .                 | 0.4103567      | 0.0002821           | .                | .                           | .                        | .                     | .                  | .                        | .                     | .                    | .                 | .              |
| MRPS26   | .                 | 0.4217516      | 0.0001822           | .                | .                           | .                        | .                     | .                  | .                        | .                     | .                    | .                 | .              |
| MRPS27   | .                 | 0.453279       | 5.00E-05            | .                | .                           | .                        | .                     | .                  | .                        | .                     | .                    | .                 | .              |
| MRPS30   | .                 | 0.4063621      | 0.0003275           | .                | .                           | .                        | .                     | 0.5945537          | 2.33E-08                 | .                     | .                    | .                 | .              |
| MRPS34   | .                 | .              | .                   | .                | .                           | .                        | .                     | 0.6651343          | 1.02E-10                 | .                     | .                    | .                 | .              |
| MRPS35   | .                 | .              | .                   | .                | .                           | .                        | .                     | 0.6482816          | 4.25E-10                 | .                     | .                    | .                 | .              |
| MRPS7    | .                 | .              | .                   | .                | .                           | .                        | .                     | 0.5279874          | 1.34E-06                 | .                     | .                    | .                 | .              |
| MRPS9    | .                 | 0.4770328      | 1.73E-05            | .                | .                           | .                        | .                     | .                  | .                        | .                     | .                    | .                 | .              |
| MS4A1    | .                 | .              | .                   | .                | .                           | .                        | .                     | .                  | .                        | 0.5291305             | 1.25E-06             | .                 | .              |
| MSANTD1  | .                 | 0.5392063      | 7.17E-07            | .                | .                           | .                        | .                     | .                  | .                        | .                     | .                    | .                 | .              |
| MSH6     | .                 | .              | .                   | .                | .                           | .                        | .                     | .                  | .                        | .                     | .                    | .                 | yes            |
| MSI1     | .                 | .              | .                   | 0.5931696        | 2.56E-08                    | .                        | .                     | .                  | .                        | .                     | .                    | .                 | .              |
| MSN      | .                 | 0.3027955      | 0.0087347           | .                | .                           | .                        | .                     | 0.404457           | 0.0003515                | .                     | .                    | .                 | yes            |
| MST1R    | .                 | .              | .                   | .                | .                           | .                        | .                     | .                  | .                        | 0.6199759             | 3.85E-09             | .                 | .              |
| MSTO1    | .                 | .              | .                   | .                | .                           | .                        | .                     | 0.4425881          | 7.87E-05                 | .                     | .                    | .                 | .              |
| MSX2     | .                 | 0.7048955      | 2.39E-12            | .                | .                           | .                        | .                     | .                  | .                        | .                     | .                    | .                 | .              |
| MT3      | .                 | 0.4995188      | 5.88E-06            | .                | .                           | .                        | .                     | .                  | .                        | .                     | .                    | .                 | .              |
| MTA1     | .                 | .              | .                   | .                | .                           | .                        | .                     | .                  | .                        | .                     | .                    | .                 | yes            |
| MTA2     | .                 | .              | .                   | .                | .                           | .                        | .                     | .                  | .                        | .                     | .                    | .                 | yes            |
| MTAP     | .                 | .              | .                   | 0.5542772        | 3.00E-07                    | .                        | .                     | .                  | .                        | .                     | .                    | .                 | .              |
| MTCH1    | .                 | .              | .                   | .                | .                           | .                        | .                     | .                  | .                        | .                     | .                    | .                 | yes            |
| MTF1     | .                 | .              | .                   | .                | .                           | .                        | .                     | 0.6752941          | 4.13E-11                 | .                     | .                    | .                 | .              |
| MTF2     | .                 | .              | .                   | .                | .                           | .                        | .                     | 0.4634025          | 3.21E-05                 | .                     | .                    | .                 | .              |
| MTFR1L   | .                 | .              | .                   | .                | .                           | .                        | .                     | 0.5442563          | 5.38E-07                 | .                     | .                    | .                 | .              |
| MTIF3    | .                 | .              | .                   | .                | .                           | .                        | .                     | 0.5404708          | 6.68E-07                 | .                     | .                    | .                 | .              |
| MTMR14   | .                 | .              | .                   | .                | .                           | .                        | .                     | 0.5723369          | 9.96E-08                 | .                     | .                    | .                 | .              |
| MTMR3    | .                 | 0.3762519      | 0.0009537           | .                | .                           | .                        | .                     | 0.4733115          | 2.05E-05                 | .                     | .                    | .                 | .              |
| MTMR4    | .                 | .              | .                   | 0.3292216        | 0.0041811                   | .                        | .                     | .                  | .                        | .                     | .                    | .                 | yes            |
| MTNR1A   | .                 | .              | .                   | .                | .                           | .                        | .                     | .                  | .                        | 0.6047146             | 1.16E-08             | .                 | .              |
| MTO1     | .                 | 0.3839721      | 0.0007321           | .                | .                           | .                        | .                     | 0.5166659          | 2.45E-06                 | .                     | .                    | .                 | .              |
| MTPN     | .                 | 0.3349489      | 0.0035336           | .                | .                           | .                        | .                     | 0.3421897          | 0.0028436                | .                     | .                    | .                 | yes            |
| MTSS1    | .                 | 0.3356577      | 0.00346             | .                | .                           | .                        | .                     | 0.4838775          | 1.26E-05                 | .                     | .                    | .                 | .              |
| MTSS1L   | .                 | .              | .                   | 0.3583355        | 0.0017195                   | .                        | .                     | 0.5253441          | 1.54E-06                 | .                     | .                    | .                 | .              |
| MTUS2    | .                 | .              | .                   | .                | .                           | .                        | .                     | 0.6508971          | 3.43E-10                 | .                     | .                    | .                 | .              |
| MUS81    | .                 | 0.5013333      | 5.37E-06            | .                | .                           | .                        | .                     | .                  | .                        | .                     | .                    | .                 | .              |
| MUSK     | .                 | .              | .                   | .                | .                           | .                        | .                     | .                  | .                        | 0.6681775             | 7.82E-11             | .                 | .              |
| MYADM    | .                 | .              | .                   | .                | .                           | .                        | .                     | 0.6552394          | 2.39E-10                 | .                     | .                    | .                 | .              |
| MYBBP1A  | .                 | .              | .                   | .                | .                           | .                        | .                     | .                  | .                        | .                     | .                    | .                 | yes            |
| MYBPC3   | .                 | .              | .                   | .                | .                           | .                        | .                     | 0.6847301          | 1.73E-11                 | .                     | .                    | .                 | .              |
| MYBPHL   | 0.4078198         | 0.0003102      | 0.4419432           | 8.08E-05         | .                           | .                        | .                     | .                  | .                        | .                     | .                    | .                 | .              |
| MYCN     | .                 | .              | .                   | .                | 0.7101961                   | 1.38E-12                 | .                     | .                  | .                        | .                     | .                    | .                 | .              |
| MYH1     | .                 | .              | .                   | .                | .                           | .                        | .                     | .                  | .                        | 0.6158154             | 5.23E-09             | .                 | .              |
| MYH10    | .                 | 0.3408809      | 0.0029586           | .                | .                           | .                        | .                     | 0.3463477          | 0.0025043                | .                     | .                    | .                 | yes            |
| MYH4     | .                 | .              | .                   | .                | .                           | .                        | .                     | 0.6305532          | 1.74E-09                 | .                     | .                    | .                 | .              |
| MYH6     | .                 | .              | .                   | .                | .                           | .                        | .                     | 0.6644186          | 1.09E-10                 | .                     | .                    | .                 | yes            |
| MYH7     | .                 | .              | .                   | .                | .                           | .                        | .                     | 0.8096118          | 2.52E-18                 | .                     | .                    | .                 | .              |

| Gene    | Atrial Expression | P-value Atrial | AV-Canal Expression | P-value AV-Canal | Branchial Arches Expression | P-value Branchial Arches | Heart Tube Expression | P-value Heart Tube | Outflow Tract Expression | P-value Outflow Tract | Ventricle Expression | P-value Ventricle | DMP Expression |
|---------|-------------------|----------------|---------------------|------------------|-----------------------------|--------------------------|-----------------------|--------------------|--------------------------|-----------------------|----------------------|-------------------|----------------|
| MYH9    | .                 | .              | .                   | .                | .                           | .                        | .                     | 0.6593256          | 1.69E-10                 | .                     | .                    | .                 | yes            |
| MYL12A  | .                 | .              | 0.3138579           | 0.0064669        | .                           | .                        | .                     | 0.5352286          | 8.96E-07                 | .                     | .                    | .                 | .              |
| MYL2    | .                 | .              | .                   | .                | .                           | .                        | .                     | .                  | .                        | 0.632706              | 1.47E-09             | .                 | .              |
| MYL3    | .                 | .              | 0.4338239           | 0.0001127        | .                           | .                        | .                     | 0.6953798          | 6.20E-12                 | .                     | .                    | .                 | .              |
| MYL4    | .                 | .              | .                   | .                | .                           | .                        | .                     | 0.9941315          | 2.71E-71                 | .                     | .                    | .                 | yes            |
| MYL6    | .                 | .              | .                   | .                | .                           | .                        | .                     | 0.6765136          | 3.70E-11                 | .                     | .                    | .                 | .              |
| MYL7    | .                 | .              | 0.5020509           | 5.18E-06         | .                           | 0.4248988                | 0.0001611             | 0.5133324          | 2.91E-06                 | .                     | .                    | .                 | yes            |
| MYL9    | .                 | .              | 0.693923            | 7.15E-12         | .                           | .                        | .                     | .                  | .                        | .                     | .                    | .                 | .              |
| MYLK3   | .                 | .              | 0.3146094           | 0.0063336        | .                           | .                        | 0.3165035             | 0.0060084          | 0.6978034                | 4.88E-12              | .                    | .                 | .              |
| MYLK4   | .                 | .              | .                   | .                | .                           | .                        | .                     | .                  | .                        | .                     | 0.5425836            | 5.92E-07          | .              |
| MYO18A  | .                 | .              | .                   | .                | .                           | .                        | .                     | .                  | .                        | 0.4478489             | 6.31E-05             | .                 | .              |
| MYO18B  | .                 | .              | .                   | .                | .                           | .                        | .                     | 0.4925159          | 8.30E-06                 | .                     | .                    | .                 | .              |
| MYO1G   | .                 | .              | .                   | .                | .                           | .                        | .                     | 0.4851548          | 1.18E-05                 | .                     | .                    | .                 | .              |
| MYO3B   | .                 | .              | .                   | .                | .                           | .                        | .                     | .                  | .                        | .                     | 0.6708858            | 6.15E-11          | .              |
| MYO7A   | .                 | .              | .                   | .                | .                           | .                        | .                     | .                  | .                        | .                     | 0.6979348            | 4.82E-12          | .              |
| MYO9B   | .                 | .              | .                   | .                | .                           | .                        | .                     | 0.6515185          | 3.25E-10                 | .                     | .                    | .                 | .              |
| MYOCD   | .                 | .              | .                   | .                | .                           | 0.3065396                | 0.0078995             | 0.5501781          | 3.82E-07                 | .                     | .                    | .                 | .              |
| MYOM1   | .                 | .              | 0.3212934           | 0.0052508        | .                           | .                        | .                     | 0.4696379          | 2.43E-05                 | .                     | .                    | .                 | .              |
| MYPOP   | .                 | .              | .                   | .                | 0.4679674                   | 2.62E-05                 | .                     | .                  | .                        | .                     | .                    | .                 | .              |
| MYRF    | .                 | .              | 0.3833106           | 0.0007491        | .                           | .                        | .                     | .                  | .                        | .                     | .                    | .                 | yes            |
| MZT1    | .                 | .              | .                   | .                | .                           | .                        | .                     | 0.4423845          | 7.93E-05                 | .                     | .                    | .                 | .              |
| MZT2B   | .                 | .              | .                   | .                | .                           | .                        | .                     | 0.5039578          | 4.71E-06                 | .                     | .                    | .                 | .              |
| NAA15   | .                 | .              | .                   | .                | .                           | .                        | .                     | 0.3227609          | 0.0050362                | .                     | .                    | .                 | yes            |
| NAA40   | .                 | .              | .                   | .                | .                           | .                        | .                     | 0.5811773          | 5.66E-08                 | .                     | .                    | .                 | .              |
| NAA50   | .                 | .              | 0.3625993           | 0.001499         | .                           | .                        | .                     | .                  | .                        | .                     | .                    | .                 | yes            |
| NAB1    | .                 | .              | 0.4727576           | 2.11E-05         | .                           | .                        | .                     | .                  | .                        | .                     | .                    | .                 | .              |
| NACC2   | .                 | .              | 0.4565293           | 4.35E-05         | .                           | .                        | .                     | .                  | .                        | .                     | .                    | .                 | .              |
| NADK2   | .                 | .              | .                   | .                | .                           | .                        | .                     | 0.7388599          | 5.69E-14                 | .                     | .                    | .                 | .              |
| NAP1L1  | .                 | .              | .                   | .                | .                           | .                        | 0.3395351             | 0.0030811          | 0.4926845                | 8.23E-06              | .                    | .                 | yes            |
| NAP1L4  | .                 | .              | 0.3338654           | 0.0036488        | .                           | .                        | .                     | .                  | .                        | .                     | .                    | .                 | yes            |
| NARFL   | .                 | .              | 0.3510742           | 0.002163         | .                           | .                        | .                     | 0.6501033          | 3.66E-10                 | .                     | .                    | .                 | .              |
| NARS    | .                 | .              | .                   | .                | 0.325936                    | 0.0045983                | .                     | .                  | .                        | .                     | .                    | .                 | yes            |
| NARS2   | .                 | .              | 0.5629886           | 1.78E-07         | .                           | .                        | .                     | .                  | .                        | .                     | .                    | .                 | .              |
| NASP    | .                 | .              | .                   | .                | .                           | .                        | .                     | .                  | .                        | .                     | .                    | .                 | yes            |
| NAT9    | .                 | .              | .                   | .                | .                           | .                        | .                     | 0.4784103          | 1.62E-05                 | .                     | .                    | .                 | .              |
| NAV3    | .                 | .              | .                   | .                | .                           | .                        | .                     | .                  | .                        | 0.6289999             | 1.96E-09             | .                 | .              |
| NBN     | .                 | .              | .                   | .                | .                           | .                        | .                     | 0.5793325          | 6.38E-08                 | .                     | .                    | .                 | .              |
| NBR1    | .                 | .              | .                   | .                | .                           | .                        | .                     | .                  | .                        | 0.6726965             | 5.23E-11             | .                 | .              |
| NCAM1   | .                 | .              | 0.3832354           | 0.000751         | .                           | .                        | .                     | .                  | .                        | .                     | .                    | .                 | .              |
| NCAPD2  | .                 | .              | .                   | .                | .                           | .                        | .                     | 0.4274879          | 0.0001454                | .                     | .                    | .                 | yes            |
| NCBP1   | .                 | .              | .                   | .                | .                           | .                        | .                     | .                  | .                        | .                     | .                    | .                 | yes            |
| NCBP2   | .                 | .              | .                   | .                | .                           | .                        | .                     | 0.5001167          | 5.71E-06                 | .                     | .                    | .                 | .              |
| NCK2    | .                 | .              | 0.3896717           | 0.0005997        | .                           | .                        | .                     | .                  | .                        | .                     | .                    | .                 | .              |
| NCKAP1  | .                 | .              | .                   | .                | .                           | .                        | .                     | .                  | .                        | .                     | .                    | .                 | yes            |
| NCKAP5L | 0.4749246         | 1.91E-05       | .                   | .                | .                           | .                        | .                     | 0.318411           | 0.0056958                | .                     | .                    | .                 | .              |
| NCL     | .                 | .              | .                   | .                | .                           | .                        | .                     | .                  | .                        | .                     | .                    | .                 | yes            |
| NCLN    | .                 | .              | .                   | .                | .                           | .                        | .                     | 0.7123364          | 1.10E-12                 | .                     | .                    | .                 | .              |
| NCOA1   | .                 | .              | .                   | .                | .                           | .                        | .                     | .                  | .                        | 0.6364394             | 1.10E-09             | .                 | .              |
| NCOA6   | .                 | .              | 0.4766131           | 1.76E-05         | .                           | .                        | .                     | .                  | .                        | .                     | .                    | .                 | .              |
| NCOR1   | .                 | .              | 0.342177            | 0.0028447        | .                           | .                        | .                     | .                  | .                        | .                     | .                    | .                 | yes            |
| NCOR2   | .                 | .              | .                   | .                | .                           | .                        | .                     | .                  | .                        | .                     | .                    | .                 | yes            |
| NDFIP1  | .                 | .              | 0.521433            | 1.90E-06         | .                           | .                        | .                     | 0.395726           | 0.0004833                | .                     | .                    | .                 | .              |
| NDUFA10 | .                 | .              | 0.5231784           | 1.73E-06         | .                           | .                        | .                     | 0.5141555          | 2.79E-06                 | .                     | .                    | .                 | .              |
| NDUFA2  | .                 | .              | 0.5334168           | 9.91E-07         | .                           | .                        | .                     | 0.430458           | 0.0001291                | .                     | .                    | .                 | .              |
| NDUFA3  | .                 | .              | 0.4460389           | 6.81E-05         | .                           | .                        | .                     | .                  | .                        | .                     | .                    | .                 | .              |
| NDUFA5  | .                 | .              | 0.4244562           | 0.0001639        | .                           | .                        | .                     | 0.3003021          | 0.0093328                | .                     | .                    | .                 | .              |
| NDUFA6  | .                 | .              | 0.459859            | 3.76E-05         | .                           | .                        | .                     | .                  | .                        | .                     | .                    | .                 | .              |
| NDUFA9  | .                 | .              | 0.4195804           | 0.0001983        | .                           | .                        | .                     | .                  | .                        | .                     | .                    | .                 | .              |
| NDUFAF2 | .                 | .              | .                   | .                | .                           | .                        | .                     | 0.4888604          | 9.90E-06                 | .                     | .                    | .                 | .              |
| NDUFAF6 | .                 | .              | .                   | .                | .                           | .                        | .                     | .                  | .                        | 0.7407355             | 4.56E-14             | .                 | .              |
| NDUFB10 | .                 | .              | 0.3592431           | 0.0016702        | .                           | .                        | .                     | 0.7262046          | 2.44E-13                 | .                     | .                    | .                 | .              |
| NDUFB7  | .                 | .              | 0.4057804           | 0.0003347        | .                           | .                        | .                     | 0.7009564          | 3.56E-12                 | .                     | .                    | .                 | .              |
| NDUFB8  | .                 | .              | 0.4267561           | 0.0001497        | .                           | .                        | .                     | .                  | .                        | .                     | .                    | .                 | .              |
| NDUFS2  | .                 | .              | 0.4148605           | 0.0002378        | .                           | .                        | .                     | 0.3539907          | 0.0019738                | .                     | .                    | .                 | yes            |
| NDUFS3  | .                 | .              | 0.3508648           | 0.0021771        | .                           | .                        | .                     | 0.5946194          | 2.32E-08                 | .                     | .                    | .                 | .              |
| NDUFS5  | .                 | .              | 0.4132355           | 0.0002529        | .                           | .                        | .                     | 0.3487356          | 0.0023262                | .                     | .                    | .                 | .              |
| NDUFS8  | .                 | .              | .                   | .                | .                           | .                        | .                     | 0.5104345          | 3.38E-06                 | .                     | .                    | .                 | .              |
| NDUFV1  | .                 | .              | 0.4447013           | 7.20E-05         | .                           | .                        | .                     | 0.5122184          | 3.09E-06                 | .                     | .                    | .                 | .              |
| NDUFV2  | .                 | .              | 0.3599948           | 0.0016304        | .                           | .                        | .                     | 0.6054139          | 1.10E-08                 | .                     | .                    | .                 | .              |
| NDUFV3  | .                 | .              | 0.3255178           | 0.004654         | .                           | .                        | .                     | 0.6708466          | 6.17E-11                 | .                     | .                    | .                 | .              |
| NECAP1  | .                 | .              | .                   | .                | .                           | .                        | .                     | 0.4804606          | 1.48E-05                 | .                     | .                    | .                 | .              |
| NEDD4   | .                 | .              | 0.5088208           | 3.68E-06         | .                           | .                        | .                     | .                  | .                        | .                     | .                    | .                 | yes            |
| NEIL1   | .                 | .              | .                   | .                | .                           | .                        | .                     | .                  | .                        | 0.5987838             | 1.75E-08             | .                 | .              |
| NEIL3   | .                 | .              | 0.578504            | 6.73E-08         | .                           | .                        | .                     | .                  | .                        | .                     | .                    | .                 | .              |
| NEK3    | .                 | .              | .                   | .                | .                           | .                        | .                     | 0.5341096          | 9.54E-07                 | .                     | .                    | .                 | .              |







| Gene     | Atrial Expression | P-value Atrial | AV-Canal Expression | P-value AV-Canal | Branchial Arches Expression | P-value Branchial Arches | Heart Tube Expression | P-value Heart Tube | Outflow Tract Expression | P-value Outflow Tract | Ventricle Expression | P-value Ventricle | DMP Expression |
|----------|-------------------|----------------|---------------------|------------------|-----------------------------|--------------------------|-----------------------|--------------------|--------------------------|-----------------------|----------------------|-------------------|----------------|
| PELP1    | .                 | .              | .                   | .                | .                           | .                        | .                     | 0.4491035          | 5.98E-05                 | .                     | .                    | .                 | .              |
| PER3     | .                 | .              | .                   | .                | .                           | .                        | .                     | .                  | .                        | 0.4852711             | 1.18E-05             | .                 | .              |
| PES1     | .                 | .              | 0.3054373           | 0.0081378        | .                           | .                        | .                     | 0.5932659          | 2.55E-08                 | .                     | .                    | .                 | .              |
| PEX2     | .                 | .              | .                   | .                | .                           | .                        | .                     | 0.4687395          | 2.53E-05                 | .                     | .                    | .                 | .              |
| PEX6     | .                 | .              | .                   | .                | .                           | .                        | .                     | 0.49494            | 7.37E-06                 | .                     | .                    | .                 | .              |
| PEX7     | .                 | .              | .                   | .                | .                           | .                        | .                     | 0.4499451          | 5.77E-05                 | .                     | .                    | .                 | .              |
| PF4      | .                 | .              | 0.4323826           | 0.0001195        | .                           | .                        | .                     | .                  | .                        | .                     | .                    | .                 | .              |
| PFAS     | .                 | .              | .                   | .                | 0.6115425                   | 7.13E-09                 | .                     | .                  | 0.3714684                | 0.0011199             | .                    | .                 | .              |
| PFKL     | .                 | .              | .                   | .                | .                           | .                        | .                     | 0.6880447          | 1.26E-11                 | .                     | .                    | .                 | yes            |
| PFN1     | .                 | .              | .                   | .                | .                           | .                        | .                     | .                  | .                        | .                     | .                    | .                 | yes            |
| PGAM1    | .                 | .              | 0.424251            | 0.0001652        | .                           | .                        | .                     | 0.5689306          | 1.23E-07                 | .                     | .                    | .                 | .              |
| PGAM2    | .                 | .              | 0.3448098           | 0.0026253        | .                           | .                        | .                     | 0.6897964          | 1.07E-11                 | .                     | .                    | .                 | .              |
| PGAM5    | .                 | .              | 0.4113906           | 0.0002713        | .                           | .                        | .                     | .                  | .                        | .                     | .                    | .                 | .              |
| PGD      | .                 | .              | .                   | .                | .                           | .                        | .                     | 0.3811085          | 0.0008081                | .                     | .                    | .                 | yes            |
| PGK1     | .                 | .              | 0.3447137           | 0.002633         | .                           | .                        | .                     | 0.4542822          | 4.79E-05                 | .                     | .                    | .                 | .              |
| PGM1     | .                 | .              | 0.3004394           | 0.009299         | .                           | .                        | 0.3742422             | 0.0010206          | 0.5520899                | 3.41E-07              | .                    | .                 | .              |
| PGRMC1   | .                 | .              | .                   | .                | .                           | .                        | .                     | .                  | .                        | .                     | .                    | .                 | yes            |
| PHACTR1  | .                 | .              | .                   | .                | .                           | .                        | .                     | .                  | .                        | 0.5991839             | 1.70E-08             | .                 | .              |
| PHAX     | .                 | .              | .                   | .                | .                           | .                        | .                     | 0.5837001          | 4.81E-08                 | .                     | .                    | .                 | .              |
| PHB      | .                 | .              | .                   | .                | .                           | .                        | .                     | 0.5087823          | 3.68E-06                 | .                     | .                    | .                 | .              |
| PHB2     | .                 | .              | .                   | .                | .                           | .                        | .                     | .                  | .                        | .                     | .                    | .                 | yes            |
| PHC1     | .                 | .              | .                   | .                | 0.4658813                   | 2.88E-05                 | .                     | .                  | .                        | .                     | .                    | .                 | .              |
| PHC2     | .                 | .              | .                   | .                | .                           | .                        | .                     | 0.3201919          | 0.0054171                | .                     | .                    | .                 | yes            |
| PHF2     | .                 | .              | .                   | .                | .                           | .                        | .                     | 0.3495658          | 0.002267                 | 0.4725575             | 2.13E-05             | .                 | .              |
| PHF20L1  | .                 | .              | .                   | .                | .                           | .                        | .                     | .                  | .                        | 0.685519              | 1.60E-11             | .                 | .              |
| PHF5A    | .                 | .              | .                   | .                | .                           | .                        | .                     | 0.5102666          | 3.41E-06                 | .                     | .                    | .                 | .              |
| PHIP     | .                 | .              | .                   | .                | .                           | .                        | .                     | .                  | .                        | .                     | .                    | .                 | yes            |
| PHKA2    | .                 | .              | .                   | .                | .                           | .                        | .                     | 0.4716422          | 2.22E-05                 | .                     | .                    | .                 | .              |
| PHLDA2   | .                 | .              | .                   | .                | .                           | .                        | .                     | 0.902758           | 4.32E-28                 | .                     | .                    | .                 | .              |
| PHLDB1   | .                 | .              | .                   | .                | .                           | .                        | .                     | .                  | .                        | 0.6740787             | 4.62E-11             | .                 | .              |
| PHPT1    | .                 | .              | 0.3994436           | 0.0004225        | .                           | .                        | .                     | .                  | .                        | .                     | .                    | .                 | .              |
| PHRF1    | .                 | .              | .                   | .                | .                           | .                        | .                     | .                  | .                        | 0.6942484             | 6.93E-12             | .                 | yes            |
| PHTF1    | .                 | .              | 0.3874815           | 0.0006478        | .                           | .                        | .                     | .                  | .                        | .                     | .                    | .                 | .              |
| PI15     | .                 | .              | .                   | .                | .                           | .                        | 0.4393048             | 9.01E-05           | .                        | .                     | .                    | .                 | .              |
| PIANP    | .                 | .              | .                   | .                | .                           | .                        | .                     | 0.4813968          | 1.41E-05                 | .                     | .                    | .                 | .              |
| PIAS1    | .                 | .              | .                   | .                | .                           | .                        | .                     | 0.4527881          | 5.11E-05                 | .                     | .                    | .                 | .              |
| PIAS2    | .                 | .              | 0.4422395           | 7.98E-05         | .                           | .                        | .                     | .                  | .                        | .                     | .                    | .                 | .              |
| PICALM   | .                 | .              | 0.3932315           | 0.0005285        | .                           | .                        | .                     | .                  | .                        | .                     | .                    | .                 | yes            |
| PIEZO2   | .                 | .              | .                   | .                | .                           | .                        | .                     | 0.4976917          | 6.44E-06                 | .                     | .                    | .                 | .              |
| PIK3C2A  | .                 | .              | .                   | .                | .                           | .                        | .                     | 0.6899173          | 1.05E-11                 | .                     | .                    | .                 | .              |
| PILRA    | .                 | .              | .                   | .                | .                           | .                        | 0.5427495             | 5.86E-07           | .                        | .                     | .                    | .                 | .              |
| PIM1     | .                 | .              | .                   | .                | .                           | .                        | .                     | 0.5469116          | 4.62E-07                 | .                     | .                    | .                 | .              |
| PIP4K2B  | .                 | .              | .                   | .                | 0.6245917                   | 2.73E-09                 | .                     | .                  | .                        | .                     | .                    | .                 | .              |
| PIP5K1A  | .                 | .              | 0.4545027           | 4.75E-05         | .                           | .                        | .                     | .                  | .                        | .                     | .                    | .                 | .              |
| PITPNB   | .                 | .              | 0.5162536           | 2.50E-06         | .                           | .                        | .                     | .                  | .                        | .                     | .                    | .                 | .              |
| PITPNM1  | .                 | .              | .                   | .                | .                           | .                        | .                     | 0.5995289          | 1.66E-08                 | .                     | .                    | .                 | .              |
| PITPNM3  | .                 | .              | .                   | .                | .                           | .                        | .                     | .                  | .                        | 0.6067216             | 1.01E-08             | .                 | .              |
| PITRM1   | .                 | .              | .                   | .                | .                           | .                        | .                     | 0.3847493          | 0.0007126                | .                     | .                    | .                 | yes            |
| PITX2    | .                 | .              | 0.4213643           | 0.000185         | .                           | .                        | .                     | .                  | .                        | .                     | .                    | .                 | .              |
| PIWIL4   | .                 | .              | .                   | .                | .                           | .                        | 0.3487806             | 0.002323           | .                        | .                     | 0.4619105            | 3.43E-05          | .              |
| PKD2L2   | .                 | .              | .                   | .                | .                           | .                        | .                     | .                  | .                        | 0.5387261             | 7.37E-07             | .                 | .              |
| PKDCC    | .                 | .              | .                   | .                | .                           | .                        | .                     | .                  | .                        | .                     | .                    | .                 | yes            |
| PKIG     | .                 | .              | .                   | .                | .                           | .                        | .                     | 0.4517839          | 5.33E-05                 | .                     | .                    | .                 | .              |
| PKM      | .                 | .              | .                   | .                | .                           | .                        | .                     | .                  | .                        | 0.3982383             | 0.0004414            | .                 | yes            |
| PKP2     | .                 | .              | 0.3114292           | 0.0069146        | .                           | .                        | .                     | 0.7556431          | 7.21E-15                 | .                     | .                    | .                 | .              |
| PLA2G12A | .                 | .              | 0.5070483           | 4.02E-06         | .                           | .                        | .                     | .                  | .                        | .                     | .                    | .                 | .              |
| PLA2G5   | .                 | .              | .                   | .                | .                           | .                        | .                     | 0.5364736          | 8.36E-07                 | .                     | .                    | .                 | .              |
| PLAGL1   | .                 | .              | 0.4727688           | 2.11E-05         | .                           | .                        | .                     | .                  | .                        | .                     | .                    | .                 | yes            |
| PLAT     | .                 | .              | 0.56396             | 1.67E-07         | .                           | .                        | .                     | .                  | .                        | .                     | .                    | .                 | .              |
| PLBD2    | .                 | .              | .                   | .                | .                           | .                        | .                     | 0.4560259          | 4.44E-05                 | .                     | .                    | .                 | .              |
| PLCG1    | .                 | .              | .                   | .                | .                           | .                        | .                     | .                  | .                        | .                     | .                    | .                 | yes            |
| PLEK     | .                 | .              | 0.4040164           | 0.0003573        | .                           | .                        | .                     | .                  | .                        | .                     | .                    | .                 | .              |
| PLEK2    | .                 | .              | 0.4155813           | 0.0002313        | .                           | .                        | .                     | .                  | .                        | .                     | .                    | .                 | .              |
| PLEKHA1  | .                 | .              | .                   | .                | .                           | .                        | .                     | 0.7808606          | 2.31E-16                 | .                     | .                    | .                 | .              |
| PLEKHA3  | .                 | .              | 0.5549673           | 2.88E-07         | .                           | .                        | .                     | .                  | .                        | .                     | .                    | .                 | .              |
| PLEKHA7  | .                 | .              | .                   | .                | .                           | .                        | .                     | .                  | .                        | 0.5547631             | 2.91E-07             | .                 | .              |
| PLEKHD1  | .                 | .              | .                   | .                | 0.5275063                   | 1.37E-06                 | .                     | .                  | .                        | .                     | .                    | .                 | .              |
| PLEKHM3  | .                 | .              | 0.408961            | 0.0002972        | .                           | .                        | .                     | .                  | .                        | .                     | .                    | .                 | .              |
| PLEKHO1  | .                 | .              | 0.4317144           | 0.0001228        | .                           | .                        | .                     | 0.4132442          | 0.0002529                | .                     | .                    | .                 | .              |
| PLIN3    | .                 | .              | 0.4096696           | 0.0002894        | .                           | .                        | .                     | 0.3705887          | 0.0011532                | .                     | .                    | .                 | .              |
| PLK4     | .                 | .              | 0.5495951           | 3.95E-07         | .                           | .                        | .                     | .                  | .                        | .                     | .                    | .                 | .              |
| PLN      | .                 | .              | .                   | .                | .                           | .                        | .                     | 0.4926545          | 8.24E-06                 | 0.4998844             | 5.77E-06             | .                 | .              |
| PLOD3    | .                 | .              | .                   | .                | .                           | .                        | .                     | 0.5432632          | 5.70E-07                 | .                     | .                    | .                 | .              |
| PLSCR1   | .                 | .              | .                   | .                | .                           | .                        | .                     | .                  | .                        | 0.6937441             | 7.28E-12             | .                 | .              |
| PLVAP    | .                 | .              | 0.3146822           | 0.0063208        | .                           | .                        | .                     | 0.7592586          | 4.52E-15                 | .                     | .                    | .                 | .              |

| Gene     | Atrial Expression | P-value Atrial | AV-Canal Expression | P-value AV-Canal | Branchial Arches Expression | P-value Branchial Arches | Heart Tube Expression | P-value Heart Tube | Outflow Tract Expression | P-value Outflow Tract | Ventricle Expression | P-value Ventricle | DMP Expression |
|----------|-------------------|----------------|---------------------|------------------|-----------------------------|--------------------------|-----------------------|--------------------|--------------------------|-----------------------|----------------------|-------------------|----------------|
| PLXNA1   | .                 | .              | .                   | .                | .                           | .                        | .                     | 0.3979827          | 0.0004455                | .                     | .                    | .                 | yes            |
| PLXNA4   | .                 | .              | 0.5242184           | 1.64E-06         | .                           | .                        | .                     | 0.2980589          | 0.0099012                | .                     | .                    | .                 | .              |
| PLXNB1   | .                 | .              | .                   | .                | .                           | .                        | .                     | .                  | .                        | .                     | .                    | .                 | yes            |
| PLXNB2   | .                 | .              | .                   | .                | .                           | .                        | .                     | .                  | .                        | .                     | .                    | .                 | yes            |
| PLXNC1   | .                 | .              | 0.6874793           | 1.33E-11         | .                           | .                        | .                     | .                  | .                        | .                     | .                    | .                 | .              |
| PLXND1   | .                 | .              | 0.3617964           | 0.0015384        | .                           | .                        | .                     | 0.7255271          | 2.64E-13                 | .                     | .                    | .                 | yes            |
| PMM2     | .                 | .              | .                   | .                | .                           | .                        | .                     | 0.6679024          | 8.01E-11                 | .                     | .                    | .                 | .              |
| PMS2     | .                 | .              | .                   | .                | .                           | .                        | .                     | 0.4702528          | 2.36E-05                 | .                     | .                    | .                 | .              |
| PNCK     | .                 | .              | .                   | .                | .                           | .                        | .                     | .                  | .                        | 0.5734974             | 9.25E-08             | .                 | .              |
| PNISR    | .                 | .              | .                   | .                | .                           | .                        | .                     | .                  | .                        | .                     | .                    | .                 | yes            |
| PNKD     | .                 | .              | .                   | .                | .                           | .                        | .                     | 0.4653132          | 2.95E-05                 | .                     | .                    | .                 | .              |
| PNNMT    | .                 | .              | 0.5677906           | 1.32E-07         | .                           | .                        | .                     | .                  | .                        | .                     | .                    | .                 | .              |
| PNN      | .                 | .              | .                   | .                | .                           | .                        | .                     | .                  | .                        | .                     | .                    | .                 | yes            |
| PODXL    | .                 | .              | 0.5904833           | 3.07E-08         | .                           | .                        | .                     | 0.3372888          | 0.0032959                | .                     | .                    | .                 | yes            |
| POFUT2   | .                 | .              | .                   | .                | .                           | .                        | .                     | 0.6277102          | 2.16E-09                 | .                     | .                    | .                 | .              |
| POLB     | .                 | .              | .                   | .                | .                           | .                        | .                     | 0.5058786          | 4.27E-06                 | .                     | .                    | .                 | .              |
| POLD1    | .                 | .              | .                   | .                | 0.6259577                   | 2.46E-09                 | .                     | .                  | .                        | .                     | .                    | .                 | .              |
| POLDIP3  | .                 | .              | .                   | .                | .                           | .                        | .                     | .                  | .                        | .                     | .                    | .                 | yes            |
| POLE3    | .                 | .              | 0.3762599           | 0.0009534        | .                           | .                        | .                     | 0.3636607          | 0.0014482                | .                     | .                    | .                 | .              |
| POLL     | .                 | .              | .                   | .                | 0.4685417                   | 2.55E-05                 | .                     | 0.3480286          | 0.0023777                | .                     | .                    | .                 | .              |
| POLR1C   | .                 | .              | .                   | .                | .                           | .                        | .                     | 0.4600599          | 3.72E-05                 | .                     | .                    | .                 | .              |
| POLR1D   | .                 | .              | 0.456663            | 4.32E-05         | .                           | .                        | .                     | .                  | .                        | .                     | .                    | .                 | .              |
| POLR1E   | .                 | .              | .                   | .                | .                           | .                        | .                     | 0.5681101          | 1.30E-07                 | .                     | .                    | .                 | .              |
| POLR2A   | .                 | .              | .                   | .                | .                           | .                        | .                     | 0.5782724          | 6.83E-08                 | .                     | .                    | .                 | yes            |
| POLR2B   | .                 | .              | .                   | .                | .                           | .                        | .                     | .                  | .                        | .                     | .                    | .                 | yes            |
| POLR2C   | .                 | .              | 0.3302478           | 0.0040579        | .                           | .                        | .                     | 0.5390006          | 7.26E-07                 | .                     | .                    | .                 | .              |
| POLR2D   | .                 | .              | 0.3976545           | 0.0004508        | .                           | .                        | .                     | .                  | .                        | .                     | .                    | .                 | .              |
| POLR2E   | .                 | .              | .                   | .                | .                           | .                        | .                     | 0.5773972          | 7.22E-08                 | .                     | .                    | .                 | .              |
| POLR2F   | .                 | .              | 0.3291278           | 0.0041925        | .                           | .                        | .                     | 0.6280586          | 2.10E-09                 | .                     | .                    | .                 | .              |
| POLR2M   | .                 | .              | .                   | .                | .                           | .                        | .                     | 0.4751347          | 1.89E-05                 | .                     | .                    | .                 | yes            |
| POM121L2 | .                 | .              | .                   | .                | .                           | .                        | .                     | .                  | .                        | 0.4840246             | 1.25E-05             | .                 | .              |
| POMT2    | .                 | .              | .                   | .                | .                           | .                        | .                     | 0.4492894          | 5.93E-05                 | .                     | .                    | .                 | .              |
| PON2     | .                 | .              | .                   | .                | .                           | .                        | .                     | 0.5407211          | 6.58E-07                 | .                     | .                    | .                 | .              |
| POPDC2   | .                 | .              | .                   | .                | .                           | .                        | .                     | 0.6728481          | 5.16E-11                 | .                     | .                    | .                 | .              |
| PPARD    | .                 | .              | .                   | .                | .                           | .                        | .                     | 0.6978581          | 4.85E-12                 | .                     | .                    | .                 | .              |
| PPHLN1   | .                 | .              | 0.5719839           | 1.02E-07         | .                           | .                        | .                     | .                  | .                        | .                     | .                    | .                 | .              |
| PPIA     | .                 | .              | .                   | .                | .                           | .                        | .                     | 0.523812           | 1.67E-06                 | .                     | .                    | .                 | .              |
| PPIB     | .                 | .              | .                   | .                | .                           | .                        | .                     | 0.612541           | 6.64E-09                 | .                     | .                    | .                 | .              |
| PPIC     | .                 | .              | 0.4232487           | 0.0001719        | .                           | .                        | .                     | .                  | .                        | .                     | .                    | .                 | .              |
| PPID     | .                 | .              | 0.4428122           | 7.79E-05         | .                           | .                        | .                     | .                  | .                        | .                     | .                    | .                 | .              |
| PPIE     | .                 | .              | .                   | .                | 0.4948762                   | 7.39E-06                 | .                     | .                  | .                        | .                     | .                    | .                 | .              |
| PPM1E    | .                 | .              | .                   | .                | .                           | .                        | .                     | .                  | .                        | 0.5113509             | 3.23E-06             | .                 | .              |
| PPM1G    | .                 | .              | .                   | .                | .                           | .                        | .                     | 0.841844           | 5.76E-21                 | .                     | .                    | .                 | yes            |
| PPM1J    | .                 | .              | 0.3616884           | 0.0015438        | .                           | .                        | .                     | 0.6840284          | 1.85E-11                 | .                     | .                    | .                 | .              |
| PPM1K    | .                 | .              | 0.3500313           | 0.0022344        | .                           | .                        | .                     | 0.4805882          | 1.47E-05                 | .                     | .                    | .                 | .              |
| PPME1    | .                 | .              | .                   | .                | .                           | .                        | .                     | 0.5884138          | 3.52E-08                 | .                     | .                    | .                 | .              |
| PPOX     | 0.5158418         | 2.56E-06       | .                   | .                | .                           | .                        | .                     | .                  | .                        | .                     | .                    | .                 | .              |
| PPP1CA   | .                 | .              | 0.3563606           | 0.0018312        | .                           | .                        | .                     | .                  | .                        | .                     | .                    | .                 | yes            |
| PPP1CB   | .                 | .              | 0.3273228           | 0.0044179        | .                           | .                        | .                     | 0.6070118          | 9.85E-09                 | .                     | .                    | .                 | yes            |
| PPP1R13B | .                 | .              | .                   | .                | .                           | .                        | .                     | 0.5132553          | 2.92E-06                 | .                     | .                    | .                 | .              |
| PPP1R14B | .                 | .              | .                   | .                | .                           | .                        | .                     | 0.7494672          | 1.57E-14                 | .                     | .                    | .                 | .              |
| PPP1R14C | .                 | .              | 0.5543285           | 2.99E-07         | .                           | .                        | .                     | .                  | .                        | .                     | .                    | .                 | .              |
| PPP1R15A | .                 | .              | .                   | .                | .                           | .                        | .                     | 0.4446745          | 7.21E-05                 | .                     | .                    | .                 | .              |
| PPP1R15B | .                 | .              | .                   | .                | .                           | .                        | .                     | 0.6663357          | 9.20E-11                 | .                     | .                    | .                 | .              |
| PPP1R17  | .                 | .              | 0.6532535           | 2.82E-10         | .                           | 0.3069402                | 0.0078144             | .                  | .                        | .                     | .                    | .                 | .              |
| PPP1R37  | .                 | .              | 0.3248325           | 0.0047465        | .                           | .                        | .                     | 0.6102515          | 7.82E-09                 | .                     | .                    | .                 | .              |
| PPP1R3D  | .                 | .              | .                   | .                | .                           | .                        | .                     | 0.64523            | 5.45E-10                 | .                     | .                    | .                 | .              |
| PPP1R9A  | .                 | .              | 0.4067171           | 0.0003232        | .                           | .                        | .                     | .                  | .                        | .                     | .                    | .                 | .              |
| PPP2CA   | .                 | .              | 0.3146596           | 0.0063248        | .                           | .                        | .                     | 0.5282614          | 1.32E-06                 | .                     | .                    | .                 | yes            |
| PPP2R1A  | .                 | .              | .                   | .                | .                           | .                        | .                     | .                  | .                        | .                     | .                    | .                 | yes            |
| PPP2R2D  | .                 | .              | .                   | .                | .                           | .                        | .                     | 0.5202112          | 2.03E-06                 | .                     | .                    | .                 | .              |
| PPP2R3A  | .                 | .              | 0.4487381           | 6.07E-05         | .                           | .                        | .                     | .                  | .                        | .                     | .                    | .                 | .              |
| PPP2R4   | .                 | .              | .                   | .                | .                           | .                        | .                     | .                  | .                        | .                     | .                    | .                 | yes            |
| PPP2R5A  | .                 | .              | .                   | .                | .                           | .                        | .                     | 0.5167753          | 2.43E-06                 | .                     | .                    | .                 | .              |
| PPP2R5D  | .                 | .              | .                   | .                | .                           | .                        | .                     | .                  | .                        | .                     | .                    | .                 | yes            |
| PPP4C    | .                 | .              | .                   | .                | .                           | .                        | .                     | .                  | .                        | .                     | .                    | .                 | yes            |
| PPP6R1   | .                 | .              | .                   | .                | .                           | .                        | .                     | 0.5563759          | 2.65E-07                 | .                     | .                    | .                 | .              |
| PPP6R3   | .                 | .              | .                   | .                | .                           | .                        | .                     | 0.4793093          | 1.56E-05                 | 0.5031632             | 4.90E-06             | .                 | yes            |
| PPTC7    | .                 | .              | .                   | .                | .                           | .                        | .                     | 0.6937521          | 7.27E-12                 | .                     | .                    | .                 | .              |
| PRAM1    | .                 | .              | .                   | .                | .                           | .                        | .                     | 0.6359715          | 1.14E-09                 | .                     | .                    | .                 | .              |
| PRDM6    | .                 | .              | 0.4099765           | 0.0002861        | .                           | .                        | .                     | .                  | .                        | .                     | .                    | .                 | .              |
| PRDX1    | .                 | .              | .                   | .                | .                           | .                        | .                     | 0.6443591          | 5.85E-10                 | .                     | .                    | .                 | .              |
| PRDX2    | .                 | .              | .                   | .                | .                           | .                        | .                     | 0.5390396          | 7.24E-07                 | .                     | .                    | .                 | yes            |
| PRDX6    | .                 | .              | .                   | .                | .                           | .                        | .                     | 0.5448311          | 5.21E-07                 | .                     | .                    | .                 | yes            |
| PRG3     | .                 | .              | .                   | .                | .                           | .                        | .                     | 0.676925           | 3.56E-11                 | .                     | .                    | .                 | .              |







| Gene    | Atrial Expression | P-value Atrial | AV-Canal Expression | P-value AV-Canal | Branchial Arches Expression | P-value Branchial Arches | Heart Tube Expression | P-value Heart Tube | Outflow Tract Expression | P-value Outflow Tract | Ventricle Expression | P-value Ventricle | DMP Expression |
|---------|-------------------|----------------|---------------------|------------------|-----------------------------|--------------------------|-----------------------|--------------------|--------------------------|-----------------------|----------------------|-------------------|----------------|
| RAPGEF2 | .                 | .              | .                   | .                | .                           | .                        | .                     | .                  | .                        | .                     | 0.5931018            | 2.57E-08          | .              |
| RAPGEF3 | .                 | .              | 0.3790259           | 0.0008679        | .                           | .                        | .                     | .                  | .                        | .                     | .                    | .                 | .              |
| RARA    | .                 | .              | .                   | .                | 0.356147                    | 0.0018436                | .                     | .                  | 0.5492382                | 4.03E-07              | .                    | .                 | .              |
| RARB    | .                 | .              | 0.3627552           | 0.0014914        | .                           | .                        | .                     | .                  | 0.5656466                | 1.51E-07              | .                    | .                 | .              |
| RASD1   | .                 | .              | .                   | .                | .                           | .                        | 0.5838226             | 4.77E-08           | .                        | .                     | .                    | .                 | .              |
| RASEF   | .                 | .              | .                   | .                | .                           | .                        | .                     | .                  | .                        | .                     | 0.5508642            | 3.67E-07          | .              |
| RASIP1  | .                 | .              | 0.4776251           | 1.68E-05         | .                           | .                        | .                     | .                  | .                        | .                     | .                    | .                 | .              |
| RASL10B | .                 | .              | 0.5460625           | 4.85E-07         | .                           | .                        | .                     | .                  | 0.4718174                | 2.20E-05              | .                    | .                 | .              |
| RASL11B | .                 | .              | 0.4145586           | 0.0002405        | .                           | .                        | .                     | .                  | 0.7340636                | 9.99E-14              | .                    | .                 | .              |
| RASSF3  | .                 | .              | 0.6651503           | 1.02E-10         | .                           | .                        | .                     | .                  | .                        | .                     | .                    | .                 | .              |
| RASSF5  | .                 | .              | .                   | .                | .                           | .                        | .                     | .                  | 0.8895709                | 3.32E-26              | .                    | .                 | .              |
| RB1CC1  | .                 | .              | 0.4814059           | 1.41E-05         | .                           | .                        | .                     | .                  | .                        | .                     | .                    | .                 | .              |
| RBBP4   | .                 | .              | 0.3059871           | 0.0080181        | 0.355287                    | 0.0018946                | .                     | .                  | .                        | .                     | .                    | .                 | yes            |
| RBBP6   | .                 | .              | .                   | .                | .                           | .                        | .                     | .                  | .                        | .                     | .                    | .                 | yes            |
| RBBP7   | .                 | .              | 0.5015763           | 5.30E-06         | .                           | .                        | .                     | .                  | .                        | .                     | .                    | .                 | yes            |
| RBFA    | .                 | .              | .                   | .                | .                           | .                        | .                     | .                  | 0.5827436                | 5.11E-08              | .                    | .                 | .              |
| RBFOX2  | .                 | .              | .                   | .                | 0.4601471                   | 3.71E-05                 | .                     | .                  | .                        | .                     | .                    | .                 | yes            |
| RBM12   | .                 | .              | .                   | .                | .                           | .                        | .                     | .                  | 0.6556867                | 2.30E-10              | .                    | .                 | .              |
| RBM20   | .                 | .              | 0.437945            | 9.53E-05         | .                           | .                        | .                     | .                  | .                        | .                     | .                    | .                 | .              |
| RBM22   | .                 | .              | .                   | .                | .                           | .                        | .                     | .                  | 0.7281967                | 1.95E-13              | .                    | .                 | .              |
| RBM24   | .                 | .              | 0.4587817           | 3.94E-05         | .                           | .                        | .                     | .                  | 0.6988374                | 4.40E-12              | .                    | .                 | .              |
| RBM25   | .                 | .              | .                   | .                | .                           | .                        | .                     | .                  | .                        | .                     | .                    | .                 | yes            |
| RBM27   | .                 | .              | .                   | .                | .                           | .                        | .                     | .                  | 0.6121114                | 6.84E-09              | .                    | .                 | .              |
| RBM28   | .                 | .              | 0.5100288           | 3.45E-06         | .                           | .                        | .                     | .                  | .                        | .                     | .                    | .                 | .              |
| RBM39   | .                 | .              | .                   | .                | .                           | .                        | .                     | .                  | .                        | .                     | .                    | .                 | yes            |
| RBM6    | .                 | .              | .                   | .                | .                           | .                        | .                     | .                  | 0.5842503                | 4.64E-08              | .                    | .                 | .              |
| RBM8A   | .                 | .              | 0.409956            | 0.0002863        | .                           | .                        | .                     | .                  | .                        | .                     | .                    | .                 | .              |
| RBMS2   | .                 | .              | 0.3050328           | 0.0082268        | .                           | .                        | .                     | .                  | 0.5116311                | 3.18E-06              | .                    | .                 | .              |
| RBMXL1  | .                 | .              | 0.3809552           | 0.0008124        | .                           | .                        | .                     | .                  | .                        | .                     | .                    | .                 | .              |
| RBPMS   | .                 | .              | 0.3841113           | 0.0007286        | .                           | .                        | .                     | .                  | .                        | .                     | .                    | .                 | .              |
| RBPMS2  | .                 | .              | 0.3867539           | 0.0006645        | .                           | .                        | .                     | .                  | .                        | .                     | .                    | .                 | .              |
| RCAN3   | .                 | .              | .                   | .                | .                           | .                        | .                     | .                  | 0.47582                  | 1.83E-05              | .                    | .                 | .              |
| RCBTB2  | .                 | .              | 0.3020168           | 0.0089178        | .                           | .                        | .                     | .                  | .                        | .                     | .                    | .                 | yes            |
| RCC2    | .                 | .              | .                   | .                | .                           | .                        | .                     | .                  | .                        | .                     | .                    | .                 | yes            |
| RCN1    | .                 | .              | 0.5519704           | 3.44E-07         | .                           | .                        | .                     | .                  | 0.4967963                | 6.73E-06              | .                    | .                 | yes            |
| RDX     | .                 | .              | .                   | .                | .                           | .                        | .                     | .                  | .                        | .                     | .                    | .                 | yes            |
| RELA    | .                 | .              | .                   | .                | .                           | .                        | .                     | .                  | 0.444831                 | 7.16E-05              | .                    | .                 | .              |
| RELL1   | .                 | .              | .                   | .                | .                           | .                        | .                     | .                  | 0.6413717                | 7.43E-10              | .                    | .                 | .              |
| RELT    | .                 | .              | .                   | .                | .                           | .                        | .                     | .                  | 0.5342273                | 9.48E-07              | .                    | .                 | .              |
| REPS1   | .                 | .              | 0.382475            | 0.000771         | .                           | .                        | .                     | .                  | .                        | .                     | .                    | .                 | .              |
| RER1    | .                 | .              | 0.404927            | 0.0003455        | .                           | .                        | .                     | .                  | .                        | .                     | .                    | .                 | .              |
| RERE    | .                 | .              | .                   | .                | .                           | .                        | .                     | .                  | 0.4605875                | 3.64E-05              | .                    | .                 | yes            |
| RETSAT  | .                 | .              | 0.4138475           | 0.0002471        | .                           | .                        | .                     | .                  | .                        | .                     | .                    | .                 | .              |
| RFC1    | .                 | .              | .                   | .                | .                           | .                        | .                     | .                  | 0.3390897                | 0.0031227             | .                    | .                 | yes            |
| RFESD   | .                 | .              | .                   | .                | .                           | .                        | .                     | .                  | 0.5941267                | 2.40E-08              | .                    | .                 | .              |
| RFK     | .                 | .              | 0.320326            | 0.0053966        | .                           | .                        | .                     | .                  | 0.5396498                | 6.99E-07              | .                    | .                 | .              |
| RFWD3   | .                 | .              | .                   | .                | .                           | .                        | .                     | .                  | 0.5890314                | 3.38E-08              | .                    | .                 | .              |
| RGP1    | .                 | .              | .                   | .                | .                           | .                        | .                     | .                  | 0.5165359                | 2.46E-06              | .                    | .                 | .              |
| RGS5    | .                 | .              | .                   | .                | .                           | .                        | .                     | .                  | 0.5740987                | 8.91E-08              | .                    | .                 | .              |
| RGS6    | .                 | .              | 0.4096421           | 0.0002897        | .                           | .                        | .                     | .                  | .                        | .                     | .                    | .                 | .              |
| RGSL1   | .                 | .              | .                   | .                | .                           | .                        | .                     | .                  | .                        | .                     | 0.6981223            | 4.73E-12          | .              |
| RHBDD2  | .                 | .              | .                   | .                | .                           | .                        | .                     | .                  | 0.4878426                | 1.04E-05              | .                    | .                 | .              |
| RHO     | .                 | .              | .                   | .                | .                           | .                        | .                     | .                  | .                        | .                     | 0.6052608            | 1.11E-08          | .              |
| RHOB    | .                 | .              | 0.4643095           | 3.09E-05         | .                           | .                        | .                     | .                  | .                        | .                     | .                    | .                 | .              |
| RHOBTB3 | .                 | .              | .                   | .                | .                           | .                        | .                     | .                  | .                        | .                     | .                    | .                 | yes            |
| RHOD    | .                 | .              | 0.3480964           | 0.0023727        | .                           | .                        | .                     | .                  | 0.5222305                | 1.82E-06              | .                    | .                 | .              |
| RHOT1   | .                 | .              | 0.4211966           | 0.0001862        | .                           | .                        | .                     | .                  | .                        | .                     | .                    | .                 | .              |
| RHOU    | .                 | .              | 0.5244269           | 1.62E-06         | .                           | .                        | .                     | .                  | 0.5829279                | 5.05E-08              | .                    | .                 | .              |
| RIC8A   | .                 | .              | 0.3357551           | 0.00345          | .                           | .                        | .                     | .                  | 0.6032866                | 1.28E-08              | .                    | .                 | .              |
| RIC8B   | .                 | .              | .                   | .                | .                           | .                        | .                     | .                  | .                        | .                     | 0.447712             | 6.34E-05          | .              |
| RIMKLB  | .                 | .              | .                   | .                | .                           | .                        | .                     | .                  | .                        | .                     | 0.5624233            | 1.84E-07          | .              |
| RIN1    | .                 | .              | .                   | .                | .                           | .                        | 0.5010392             | 5.45E-06           | .                        | .                     | .                    | .                 | .              |
| RIPK2   | .                 | .              | 0.4118156           | 0.0002669        | .                           | .                        | .                     | .                  | .                        | .                     | .                    | .                 | .              |
| RIPPLY3 | .                 | .              | .                   | .                | .                           | .                        | .                     | .                  | 0.6132004                | 6.33E-09              | .                    | .                 | .              |
| RLF     | .                 | .              | .                   | .                | .                           | .                        | .                     | .                  | 0.4756185                | 1.85E-05              | .                    | .                 | .              |
| RLIM    | .                 | .              | .                   | .                | .                           | .                        | .                     | .                  | .                        | .                     | .                    | .                 | yes            |
| RMDN3   | .                 | .              | .                   | .                | .                           | .                        | .                     | .                  | 0.489978                 | 9.38E-06              | .                    | .                 | .              |
| RNASE2  | .                 | .              | .                   | .                | .                           | .                        | .                     | .                  | .                        | .                     | 0.7645011            | 2.26E-15          | .              |
| RNF10   | .                 | .              | .                   | .                | .                           | .                        | .                     | .                  | 0.6318061                | 1.58E-09              | .                    | .                 | yes            |
| RNF112  | 0.5036805         | 4.77E-06       | .                   | .                | .                           | .                        | .                     | .                  | .                        | .                     | .                    | .                 | .              |
| RNF114  | .                 | .              | .                   | .                | .                           | .                        | .                     | .                  | 0.6030914                | 1.30E-08              | .                    | .                 | .              |
| RNF139  | .                 | .              | .                   | .                | .                           | .                        | 0.5861707             | 4.09E-08           | .                        | .                     | .                    | .                 | .              |
| RNF145  | .                 | .              | .                   | .                | .                           | .                        | .                     | .                  | 0.4420609                | 8.04E-05              | .                    | .                 | .              |
| RNF149  | .                 | .              | .                   | .                | .                           | .                        | .                     | .                  | 0.4881779                | 1.02E-05              | .                    | .                 | yes            |
| RNF168  | .                 | .              | 0.3966686           | 0.0004672        | .                           | .                        | .                     | .                  | 0.3058805                | 0.0080412             | .                    | .                 | .              |

| Gene           | Atrial Expression | P-value Atrial | AV-Canal Expression | P-value AV-Canal | Branchial Arches Expression | P-value Branchial Arches | Heart Tube Expression | P-value Heart Tube | Outflow Tract Expression | P-value Outflow Tract | Ventricle Expression | P-value Ventricle | DMP Expression |
|----------------|-------------------|----------------|---------------------|------------------|-----------------------------|--------------------------|-----------------------|--------------------|--------------------------|-----------------------|----------------------|-------------------|----------------|
| RNF17          | .                 | .              | .                   | .                | .                           | .                        | .                     | .                  | .                        | 0.6777365             | 3.31E-11             | .                 | .              |
| RNF170         | .                 | .              | .                   | .                | .                           | .                        | .                     | 0.4399737          | 8.77E-05                 | .                     | .                    | .                 | .              |
| RNF187         | .                 | .              | 0.3051877           | 0.0081926        | .                           | .                        | .                     | 0.7481152          | 1.86E-14                 | .                     | .                    | .                 | yes            |
| RNF207         | .                 | .              | 0.6856473           | 1.58E-11         | .                           | .                        | .                     | .                  | .                        | .                     | .                    | .                 | .              |
| RNF219         | .                 | .              | .                   | .                | 0.4514173                   | 5.42E-05                 | .                     | .                  | .                        | .                     | .                    | .                 | .              |
| RNF25          | .                 | .              | 0.4609191           | 3.59E-05         | .                           | .                        | .                     | .                  | .                        | .                     | .                    | .                 | .              |
| RNF44          | .                 | .              | .                   | .                | .                           | .                        | .                     | 0.4065533          | 0.0003252                | .                     | .                    | .                 | yes            |
| RNF5           | .                 | .              | 0.4875031           | 1.06E-05         | .                           | .                        | .                     | 0.4917421          | 8.61E-06                 | .                     | .                    | .                 | .              |
| RNMT           | .                 | .              | .                   | .                | .                           | .                        | .                     | 0.6015112          | 1.45E-08                 | .                     | .                    | .                 | .              |
| RNMTL1         | .                 | .              | .                   | .                | .                           | .                        | .                     | 0.4585968          | 3.97E-05                 | .                     | .                    | .                 | .              |
| ROCK2          | .                 | .              | .                   | .                | .                           | .                        | .                     | 0.548609           | 4.18E-07                 | .                     | .                    | .                 | .              |
| RP11-503N18.1  | .                 | .              | .                   | .                | .                           | .                        | .                     | .                  | .                        | 0.596642              | 2.02E-08             | .                 | .              |
| RPA1           | .                 | .              | .                   | .                | .                           | .                        | .                     | 0.3820277          | 0.000783                 | .                     | .                    | .                 | yes            |
| RPAP3          | .                 | .              | 0.3240164           | 0.0048588        | .                           | .                        | .                     | 0.4746735          | 1.93E-05                 | .                     | .                    | .                 | .              |
| RPF2           | .                 | .              | .                   | .                | .                           | .                        | .                     | 0.6824295          | 2.14E-11                 | .                     | .                    | .                 | .              |
| RPGR           | .                 | .              | 0.4281228           | 0.0001418        | .                           | .                        | .                     | .                  | .                        | .                     | .                    | .                 | .              |
| RPL13A         | .                 | .              | .                   | .                | .                           | .                        | .                     | .                  | .                        | .                     | .                    | .                 | yes            |
| RPL22          | .                 | .              | .                   | .                | .                           | .                        | .                     | .                  | .                        | .                     | .                    | .                 | yes            |
| RPL32          | .                 | .              | .                   | .                | .                           | .                        | .                     | .                  | .                        | .                     | .                    | .                 | yes            |
| RPL36A-HNRNPH2 | .                 | .              | .                   | .                | .                           | .                        | .                     | 0.5001735          | 5.69E-06                 | .                     | .                    | .                 | .              |
| RPL37A         | .                 | .              | .                   | .                | .                           | .                        | .                     | 0.503503           | 4.82E-06                 | .                     | .                    | .                 | .              |
| RPL3L          | .                 | .              | .                   | .                | .                           | .                        | .                     | .                  | .                        | 0.560284              | 2.09E-07             | .                 | .              |
| RPL4           | .                 | .              | .                   | .                | .                           | .                        | .                     | .                  | .                        | .                     | .                    | .                 | yes            |
| RPL7           | .                 | .              | .                   | .                | .                           | .                        | .                     | 0.6219135          | 3.34E-09                 | .                     | .                    | .                 | .              |
| RPL7A          | .                 | .              | .                   | .                | .                           | .                        | .                     | 0.5567511          | 2.59E-07                 | .                     | .                    | .                 | .              |
| RPL7L1         | .                 | .              | 0.3276845           | 0.0043719        | .                           | .                        | .                     | 0.4863242          | 1.12E-05                 | .                     | .                    | .                 | .              |
| RPL8           | .                 | .              | .                   | .                | .                           | .                        | .                     | .                  | .                        | .                     | .                    | .                 | yes            |
| RPLP0          | .                 | .              | .                   | .                | .                           | .                        | .                     | 0.3890254          | 0.0006136                | .                     | .                    | .                 | yes            |
| RPLP1          | .                 | .              | .                   | .                | .                           | .                        | .                     | 0.3510894          | 0.0021619                | .                     | .                    | .                 | yes            |
| RPN1           | .                 | .              | .                   | .                | .                           | .                        | .                     | 0.6490688          | 3.98E-10                 | .                     | .                    | .                 | yes            |
| RPN2           | .                 | .              | .                   | .                | .                           | .                        | .                     | 0.5461062          | 4.84E-07                 | .                     | .                    | .                 | yes            |
| RPP25L         | .                 | .              | .                   | .                | .                           | 0.5528353                | 3.27E-07              | .                  | .                        | .                     | .                    | .                 | .              |
| RPRD2          | .                 | .              | .                   | .                | .                           | .                        | .                     | 0.8906133          | 2.40E-26                 | .                     | .                    | .                 | .              |
| RPS10-NUDT3    | .                 | .              | .                   | .                | .                           | .                        | .                     | 0.6593752          | 1.68E-10                 | .                     | .                    | .                 | .              |
| RPS11          | .                 | .              | .                   | .                | .                           | .                        | .                     | 0.7340505          | 1.00E-13                 | .                     | .                    | .                 | yes            |
| RPS12          | .                 | .              | 0.6136279           | 6.13E-09         | .                           | .                        | .                     | .                  | .                        | .                     | .                    | .                 | .              |
| RPS14          | .                 | .              | .                   | .                | .                           | .                        | .                     | .                  | .                        | .                     | .                    | .                 | yes            |
| RPS15          | .                 | .              | 0.4529107           | 5.08E-05         | .                           | .                        | .                     | .                  | .                        | .                     | .                    | .                 | yes            |
| RPS19          | .                 | .              | .                   | .                | .                           | .                        | .                     | 0.6178985          | 4.49E-09                 | .                     | .                    | .                 | .              |
| RPS25          | .                 | .              | 0.4131973           | 0.0002533        | .                           | .                        | .                     | .                  | .                        | .                     | .                    | .                 | .              |
| RPS26          | .                 | .              | .                   | .                | .                           | .                        | .                     | .                  | .                        | .                     | .                    | .                 | yes            |
| RPS27          | .                 | .              | .                   | .                | .                           | .                        | .                     | 0.4425611          | 7.87E-05                 | .                     | .                    | .                 | .              |
| RPS3           | .                 | .              | .                   | .                | .                           | .                        | .                     | .                  | .                        | .                     | .                    | .                 | yes            |
| RPS5           | .                 | .              | .                   | .                | .                           | .                        | .                     | .                  | .                        | .                     | .                    | .                 | yes            |
| RPS9           | .                 | .              | .                   | .                | .                           | .                        | .                     | .                  | .                        | .                     | .                    | .                 | yes            |
| RPTOR          | .                 | .              | .                   | .                | .                           | .                        | .                     | .                  | .                        | 0.5050095             | 4.46E-06             | .                 | .              |
| RRAD           | .                 | .              | 0.7478783           | 1.91E-14         | .                           | .                        | .                     | .                  | .                        | .                     | .                    | .                 | .              |
| RRAGD          | .                 | .              | .                   | .                | .                           | .                        | .                     | 0.5464521          | 4.74E-07                 | .                     | .                    | .                 | .              |
| RRAS           | .                 | .              | 0.4824415           | 1.34E-05         | .                           | .                        | .                     | .                  | .                        | .                     | .                    | .                 | .              |
| RRAS2          | .                 | .              | 0.3958258           | 0.0004816        | .                           | .                        | .                     | 0.4867173          | 1.10E-05                 | .                     | .                    | .                 | .              |
| RRM1           | .                 | .              | 0.3860355           | 0.0006814        | .                           | .                        | .                     | 0.3345181          | 0.003579                 | .                     | .                    | .                 | yes            |
| RRM2           | .                 | .              | .                   | .                | 0.3311378                   | 0.0039536                | .                     | .                  | .                        | .                     | .                    | .                 | yes            |
| RRN3           | .                 | .              | 0.3304236           | 0.0040371        | .                           | .                        | .                     | 0.5043144          | 4.62E-06                 | .                     | .                    | .                 | .              |
| RRP1           | .                 | .              | .                   | .                | .                           | .                        | .                     | .                  | .                        | .                     | .                    | .                 | yes            |
| RRS1           | .                 | .              | .                   | .                | .                           | .                        | .                     | 0.481744           | 1.39E-05                 | .                     | .                    | .                 | .              |
| RSG1           | .                 | .              | .                   | .                | .                           | .                        | .                     | .                  | .                        | 0.6344267             | 1.29E-09             | .                 | .              |
| RSL1D1         | .                 | .              | .                   | .                | .                           | .                        | .                     | .                  | .                        | .                     | .                    | .                 | yes            |
| RSL24D1        | .                 | .              | .                   | .                | .                           | .                        | .                     | 0.475867           | 1.83E-05                 | .                     | .                    | .                 | .              |
| RSPH10B2       | .                 | .              | .                   | .                | 0.6100052                   | 7.96E-09                 | .                     | .                  | .                        | .                     | .                    | .                 | .              |
| RSPO3          | .                 | .              | .                   | .                | .                           | .                        | .                     | 0.5581565          | 2.38E-07                 | .                     | .                    | .                 | .              |
| RTBDN          | .                 | .              | .                   | .                | .                           | .                        | .                     | 0.6409399          | 7.70E-10                 | .                     | .                    | .                 | .              |
| RTF1           | .                 | .              | .                   | .                | 0.4760231                   | 1.81E-05                 | .                     | .                  | .                        | .                     | .                    | .                 | .              |
| RTKN           | .                 | .              | .                   | .                | .                           | .                        | .                     | 0.6366125          | 1.08E-09                 | .                     | .                    | .                 | .              |
| RTN2           | .                 | .              | .                   | .                | .                           | .                        | 0.4844304             | 1.22E-05           | .                        | .                     | .                    | .                 | .              |
| RTN3           | .                 | .              | .                   | .                | .                           | .                        | .                     | 0.338637           | 0.0031654                | .                     | .                    | .                 | yes            |
| RTN4           | .                 | .              | 0.6718773           | 5.63E-11         | .                           | .                        | .                     | .                  | .                        | .                     | .                    | .                 | yes            |
| RTN4RL1        | .                 | .              | 0.4637772           | 3.16E-05         | .                           | .                        | .                     | 0.3678268          | 0.0012636                | .                     | .                    | .                 | .              |
| RUVBL1         | .                 | .              | .                   | .                | 0.5931658                   | 2.56E-08                 | .                     | .                  | .                        | .                     | .                    | .                 | .              |
| RUVBL2         | .                 | .              | .                   | .                | 0.3702147                   | 0.0011676                | .                     | .                  | .                        | .                     | .                    | .                 | yes            |
| RWDD4          | .                 | .              | 0.3094044           | 0.0073085        | 0.5025817                   | 5.04E-06                 | .                     | .                  | .                        | .                     | .                    | .                 | .              |
| RXRG           | .                 | .              | .                   | .                | .                           | .                        | .                     | .                  | .                        | 0.6962319             | 5.70E-12             | .                 | .              |
| RYK            | .                 | .              | .                   | .                | .                           | .                        | .                     | 0.4585639          | 3.98E-05                 | .                     | .                    | .                 | .              |
| S100A1         | .                 | .              | 0.6173332           | 4.68E-09         | .                           | .                        | .                     | 0.3469884          | 0.0024553                | .                     | .                    | .                 | .              |
| SAE1           | .                 | .              | .                   | .                | .                           | .                        | .                     | 0.827659           | 9.76E-20                 | .                     | .                    | .                 | yes            |
| SAFB           | .                 | .              | .                   | .                | .                           | .                        | .                     | 0.4193404          | 0.0002001                | .                     | .                    | .                 | yes            |

| Gene     | Atrial Expression | P-value Atrial | AV-Canal Expression | P-value AV-Canal | Branchial Arches Expression | P-value Branchial Arches | Heart Tube Expression | P-value Heart Tube | Outflow Tract Expression | P-value Outflow Tract | Ventricle Expression | P-value Ventricle | DMP Expression |
|----------|-------------------|----------------|---------------------|------------------|-----------------------------|--------------------------|-----------------------|--------------------|--------------------------|-----------------------|----------------------|-------------------|----------------|
| SAMD1    | .                 | .              | 0.4120211           | 0.0002649        | .                           | .                        | .                     | .                  | 0.4235504                | 0.0001698             | .                    | .                 | .              |
| SAMD11   | .                 | .              | .                   | .                | .                           | .                        | .                     | .                  | 0.6979474                | 4.81E-12              | .                    | .                 | .              |
| SAMD4A   | .                 | .              | .                   | .                | .                           | .                        | 0.4812676             | 1.42E-05           | 0.47458                  | 1.94E-05              | .                    | .                 | .              |
| SAMD4B   | .                 | .              | 0.3949879           | 0.0004963        | .                           | .                        | .                     | .                  | 0.4720028                | 2.18E-05              | .                    | .                 | .              |
| SAMM50   | .                 | .              | 0.333321            | 0.0037079        | .                           | .                        | .                     | .                  | 0.5424719                | 5.96E-07              | .                    | .                 | .              |
| SAP130   | .                 | .              | .                   | .                | .                           | .                        | .                     | .                  | 0.7237921                | 3.20E-13              | .                    | .                 | .              |
| SAP30    | .                 | .              | 0.4347116           | 0.0001088        | 0.3388201                   | 0.0031481                | .                     | .                  | 0.5233786                | 1.71E-06              | .                    | .                 | .              |
| SAP30L   | .                 | .              | 0.3697636           | 0.0011852        | .                           | .                        | .                     | .                  | 0.5362765                | 8.45E-07              | .                    | .                 | .              |
| SAR1A    | .                 | .              | 0.4059342           | 0.0003328        | .                           | .                        | .                     | .                  | .                        | .                     | .                    | .                 | yes            |
| SARS2    | .                 | .              | .                   | .                | .                           | .                        | .                     | .                  | 0.5953669                | 2.21E-08              | .                    | .                 | .              |
| SART3    | .                 | .              | .                   | .                | 0.4373378                   | 9.77E-05                 | .                     | .                  | .                        | .                     | .                    | .                 | .              |
| SAT1     | .                 | .              | .                   | .                | .                           | .                        | .                     | .                  | 0.5821067                | 5.33E-08              | .                    | .                 | .              |
| SBK1     | .                 | .              | .                   | .                | 0.3433238                   | 0.0027472                | .                     | .                  | .                        | .                     | .                    | .                 | yes            |
| SBNO1    | .                 | .              | 0.456548            | 4.34E-05         | .                           | .                        | .                     | .                  | .                        | .                     | .                    | .                 | .              |
| SCAF1    | .                 | .              | .                   | .                | .                           | .                        | .                     | .                  | .                        | .                     | .                    | .                 | yes            |
| SCAF11   | .                 | .              | 0.4486393           | 6.10E-05         | .                           | .                        | .                     | .                  | .                        | .                     | .                    | .                 | yes            |
| SCAF4    | .                 | .              | .                   | .                | .                           | .                        | .                     | .                  | .                        | .                     | 0.7192861            | 5.24E-13          | .              |
| SCAMP4   | .                 | .              | .                   | .                | .                           | .                        | .                     | .                  | 0.5241808                | 1.64E-06              | .                    | .                 | .              |
| SCAND1   | .                 | .              | 0.3942364           | 0.0005099        | .                           | .                        | .                     | .                  | 0.4711077                | 2.27E-05              | .                    | .                 | .              |
| SCCPDH   | .                 | .              | 0.4188468           | 0.000204         | .                           | .                        | .                     | .                  | .                        | .                     | .                    | .                 | .              |
| SCGB1C1  | .                 | .              | .                   | .                | .                           | .                        | .                     | .                  | .                        | .                     | 0.6307239            | 1.71E-09          | .              |
| SCHIP1   | .                 | .              | .                   | .                | .                           | .                        | .                     | .                  | 0.5155124                | 2.60E-06              | .                    | .                 | .              |
| SCMH1    | .                 | .              | .                   | .                | .                           | .                        | .                     | .                  | .                        | .                     | 0.5048773            | 4.49E-06          | .              |
| SCML2    | .                 | .              | .                   | .                | .                           | .                        | .                     | .                  | .                        | .                     | 0.4960034            | 7.00E-06          | .              |
| SCO1     | .                 | .              | 0.4025441           | 0.0003772        | .                           | .                        | .                     | .                  | .                        | .                     | .                    | .                 | .              |
| SCPEP1   | .                 | .              | .                   | .                | .                           | .                        | .                     | .                  | 0.4484828                | 6.14E-05              | .                    | .                 | .              |
| SCRIB    | .                 | .              | .                   | .                | .                           | .                        | .                     | .                  | .                        | .                     | .                    | .                 | yes            |
| SCRN2    | .                 | .              | 0.423082            | 0.000173         | .                           | .                        | .                     | .                  | .                        | .                     | .                    | .                 | .              |
| SDC2     | .                 | .              | .                   | .                | .                           | .                        | .                     | .                  | 0.446075                 | 6.80E-05              | .                    | .                 | .              |
| SDCCAG3  | .                 | .              | 0.5829216           | 5.06E-08         | .                           | .                        | .                     | .                  | .                        | .                     | .                    | .                 | .              |
| SDHA     | .                 | .              | 0.3347708           | 0.0035523        | .                           | .                        | .                     | .                  | .                        | .                     | .                    | .                 | yes            |
| SDHAF1   | .                 | .              | .                   | .                | .                           | .                        | .                     | .                  | 0.7417576                | 4.03E-14              | .                    | .                 | .              |
| SDHB     | .                 | .              | 0.3261624           | 0.0045684        | .                           | .                        | .                     | .                  | 0.6410126                | 7.65E-10              | .                    | .                 | .              |
| SDHC     | .                 | .              | .                   | .                | .                           | .                        | .                     | .                  | 0.7050462                | 2.35E-12              | .                    | .                 | .              |
| SDHD     | .                 | .              | 0.3499392           | 0.0022409        | .                           | .                        | .                     | .                  | 0.5558889                | 2.73E-07              | .                    | .                 | .              |
| SEC11A   | .                 | .              | 0.4795933           | 1.54E-05         | .                           | .                        | .                     | .                  | 0.4300876                | 0.0001311             | .                    | .                 | .              |
| SEC14L1  | .                 | .              | 0.5292237           | 1.25E-06         | .                           | .                        | .                     | .                  | .                        | .                     | .                    | .                 | .              |
| SEC23A   | .                 | .              | 0.3794207           | 0.0008563        | .                           | .                        | .                     | .                  | 0.4573881                | 4.19E-05              | .                    | .                 | .              |
| SEC23IP  | .                 | .              | .                   | .                | 0.5667966                   | 1.41E-07                 | .                     | .                  | .                        | .                     | .                    | .                 | .              |
| SEC24C   | .                 | .              | .                   | .                | .                           | .                        | .                     | .                  | .                        | .                     | .                    | .                 | yes            |
| SEC31A   | .                 | .              | .                   | .                | .                           | .                        | .                     | .                  | .                        | .                     | 0.3848615            | 0.0007098         | yes            |
| SEC61a1  | .                 | .              | .                   | .                | .                           | .                        | .                     | .                  | .                        | .                     | .                    | .                 | yes            |
| SEC63    | .                 | .              | .                   | .                | .                           | .                        | .                     | .                  | 0.6145703                | 5.73E-09              | .                    | .                 | .              |
| SECISBP2 | .                 | .              | .                   | .                | .                           | .                        | .                     | .                  | 0.5135963                | 2.87E-06              | .                    | .                 | .              |
| SEH1L    | .                 | .              | .                   | .                | .                           | .                        | .                     | .                  | 0.3095088                | 0.0072877             | .                    | .                 | yes            |
| SELP     | .                 | .              | .                   | .                | .                           | .                        | .                     | .                  | .                        | .                     | 0.5447809            | 5.22E-07          | .              |
| SELT     | .                 | .              | 0.5690892           | 1.22E-07         | .                           | .                        | .                     | .                  | 0.3032384                | 0.008632              | .                    | .                 | .              |
| SEPHS1   | .                 | .              | .                   | .                | .                           | .                        | .                     | .                  | .                        | .                     | .                    | .                 | yes            |
| SEPN1    | .                 | .              | .                   | .                | .                           | .                        | .                     | .                  | 0.4770817                | 1.73E-05              | .                    | .                 | .              |
| SERBP1   | .                 | .              | .                   | .                | .                           | .                        | .                     | .                  | 0.5615315                | 1.94E-07              | .                    | .                 | yes            |
| SERF2    | .                 | .              | .                   | .                | .                           | .                        | .                     | .                  | 0.450466                 | 5.64E-05              | .                    | .                 | .              |
| SERHL2   | .                 | .              | .                   | .                | .                           | .                        | .                     | .                  | 0.4723793                | 2.14E-05              | .                    | .                 | .              |
| SERP1    | .                 | .              | .                   | .                | .                           | .                        | .                     | .                  | .                        | .                     | .                    | .                 | yes            |
| SERPIN8  | .                 | .              | .                   | .                | .                           | .                        | .                     | .                  | 0.5750086                | 8.41E-08              | .                    | .                 | .              |
| SERPINE1 | .                 | .              | .                   | .                | .                           | .                        | .                     | .                  | 0.668303                 | 7.73E-11              | .                    | .                 | .              |
| SERPINH1 | .                 | .              | .                   | .                | .                           | .                        | .                     | .                  | .                        | .                     | .                    | .                 | yes            |
| SERPINI1 | .                 | .              | .                   | .                | .                           | .                        | .                     | .                  | .                        | .                     | 0.5934189            | 2.52E-08          | .              |
| SERTAD3  | .                 | .              | .                   | .                | .                           | .                        | .                     | .                  | 0.4499547                | 5.77E-05              | .                    | .                 | .              |
| SESTD1   | .                 | .              | .                   | .                | .                           | .                        | .                     | .                  | .                        | .                     | 0.5999778            | 1.61E-08          | .              |
| SETD1A   | .                 | .              | .                   | .                | .                           | .                        | .                     | .                  | 0.7138317                | 9.42E-13              | .                    | .                 | .              |
| SETD5    | .                 | .              | 0.3061045           | 0.0079928        | .                           | .                        | .                     | .                  | .                        | .                     | .                    | .                 | yes            |
| SETD8    | .                 | .              | 0.4197257           | 0.0001972        | .                           | .                        | .                     | .                  | 0.555343                 | 2.82E-07              | .                    | .                 | .              |
| SF1      | .                 | .              | .                   | .                | 0.3952114                   | 0.0004924                | .                     | .                  | .                        | .                     | .                    | .                 | yes            |
| SF3A1    | .                 | .              | .                   | .                | .                           | .                        | .                     | .                  | .                        | .                     | .                    | .                 | yes            |
| SF3B1    | .                 | .              | .                   | .                | .                           | .                        | .                     | .                  | .                        | .                     | .                    | .                 | yes            |
| SF3B2    | .                 | .              | .                   | .                | .                           | .                        | .                     | .                  | .                        | .                     | .                    | .                 | yes            |
| SF3B3    | .                 | .              | .                   | .                | .                           | .                        | .                     | .                  | 0.391098                 | 0.0005702             | .                    | .                 | yes            |
| SF3B4    | .                 | .              | .                   | .                | 0.6191357                   | 4.10E-09                 | .                     | .                  | .                        | .                     | .                    | .                 | .              |
| SF3B5    | .                 | .              | .                   | .                | .                           | .                        | .                     | .                  | 0.5355244                | 8.82E-07              | .                    | .                 | .              |
| SFPQ     | .                 | .              | .                   | .                | .                           | .                        | .                     | .                  | .                        | .                     | .                    | .                 | yes            |
| SFR1     | .                 | .              | .                   | .                | .                           | .                        | .                     | .                  | 0.5615958                | 1.93E-07              | .                    | .                 | yes            |
| SFRP1    | .                 | .              | .                   | .                | .                           | .                        | .                     | .                  | .                        | .                     | .                    | .                 | yes            |
| SFT2D1   | .                 | .              | 0.484595            | 1.21E-05         | .                           | .                        | .                     | .                  | 0.3068385                | 0.0078359             | .                    | .                 | .              |
| SFT2D2   | .                 | .              | 0.5616853           | 1.92E-07         | .                           | .                        | .                     | .                  | .                        | .                     | .                    | .                 | .              |
| SGMS1    | .                 | .              | .                   | .                | .                           | .                        | .                     | .                  | 0.6328684                | 1.45E-09              | .                    | .                 | .              |



| Gene     | Atrial Expression | P-value Atrial | AV-Canal Expression | P-value AV-Canal | Branchial Arches Expression | P-value Branchial Arches | Heart Tube Expression | P-value Heart Tube | Outflow Tract Expression | P-value Outflow Tract | Ventricle Expression | P-value Ventricle | DMP Expression |
|----------|-------------------|----------------|---------------------|------------------|-----------------------------|--------------------------|-----------------------|--------------------|--------------------------|-----------------------|----------------------|-------------------|----------------|
| SLC50A1  | .                 | .              | .                   | .                | .                           | .                        | .                     | 0.6029546          | 1.31E-08                 | .                     | .                    | .                 | .              |
| SLC7A14  | .                 | .              | .                   | .                | .                           | 0.5470413                | 4.58E-07              | .                  | .                        | .                     | .                    | .                 | .              |
| SLC7A6OS | .                 | .              | 0.4584348           | 4.00E-05         | .                           | .                        | .                     | 0.4492284          | 5.95E-05                 | .                     | .                    | .                 | .              |
| SLC9B1   | .                 | .              | 0.4356675           | 0.0001046        | .                           | .                        | .                     | 0.4296003          | 0.0001336                | .                     | .                    | .                 | .              |
| SLCO1C1  | .                 | .              | .                   | .                | .                           | .                        | .                     | .                  | .                        | 0.5358913             | 8.64E-07             | .                 | .              |
| SLCO3A1  | .                 | .              | 0.5462476           | 4.80E-07         | .                           | .                        | .                     | 0.3863063          | 0.000675                 | .                     | .                    | .                 | .              |
| SLCO4C1  | .                 | .              | 0.4854803           | 1.16E-05         | .                           | .                        | .                     | 0.3215892          | 0.0052069                | .                     | .                    | .                 | .              |
| SLIRP    | .                 | .              | .                   | .                | .                           | .                        | .                     | 0.5420091          | 6.12E-07                 | .                     | .                    | .                 | .              |
| SLITRK5  | .                 | .              | 0.4691589           | 2.48E-05         | .                           | .                        | .                     | .                  | .                        | .                     | .                    | .                 | .              |
| SLMAP    | .                 | .              | .                   | .                | .                           | .                        | .                     | .                  | .                        | 0.4920504             | 8.49E-06             | .                 | .              |
| SLMO2    | .                 | .              | .                   | .                | .                           | .                        | .                     | 0.4953858          | 7.21E-06                 | .                     | .                    | .                 | .              |
| SMAD5    | .                 | .              | .                   | .                | .                           | .                        | .                     | .                  | .                        | .                     | .                    | .                 | yes            |
| SMAD6    | .                 | .              | 0.6379183           | 9.78E-10         | .                           | .                        | .                     | .                  | .                        | .                     | .                    | .                 | .              |
| SMAD7    | .                 | .              | 0.4575985           | 4.15E-05         | .                           | .                        | .                     | 0.5253475          | 1.54E-06                 | .                     | .                    | .                 | .              |
| SMARCA4  | .                 | .              | .                   | .                | .                           | .                        | .                     | .                  | .                        | .                     | .                    | .                 | yes            |
| SMARCA5  | .                 | .              | 0.3801202           | 0.000836         | .                           | .                        | .                     | .                  | .                        | .                     | .                    | .                 | .              |
| SMARCB1  | .                 | .              | .                   | .                | .                           | .                        | .                     | .                  | .                        | .                     | .                    | .                 | yes            |
| SMARCC1  | .                 | .              | .                   | .                | .                           | .                        | .                     | .                  | .                        | .                     | .                    | .                 | yes            |
| SMARCC2  | .                 | .              | .                   | .                | .                           | .                        | .                     | .                  | .                        | .                     | .                    | .                 | yes            |
| SMARCD1  | .                 | .              | .                   | .                | 0.7456745                   | 2.51E-14                 | .                     | .                  | .                        | .                     | .                    | .                 | yes            |
| SMARCD3  | .                 | .              | .                   | .                | .                           | .                        | .                     | 0.647061           | 4.70E-10                 | .                     | .                    | .                 | .              |
| SMC1A    | .                 | .              | .                   | .                | .                           | .                        | .                     | .                  | .                        | .                     | .                    | .                 | yes            |
| SMC2     | .                 | .              | .                   | .                | .                           | .                        | .                     | .                  | .                        | .                     | .                    | .                 | yes            |
| SMC3     | .                 | .              | .                   | .                | .                           | .                        | .                     | .                  | .                        | .                     | .                    | .                 | yes            |
| SMC4     | .                 | .              | .                   | .                | .                           | .                        | .                     | 0.3138048          | 0.0064764                | .                     | .                    | .                 | yes            |
| SMCHD1   | .                 | .              | 0.3383976           | 0.0031883        | .                           | .                        | .                     | .                  | .                        | .                     | .                    | .                 | yes            |
| SMCR8    | .                 | .              | 0.5701014           | 1.15E-07         | .                           | .                        | .                     | .                  | .                        | .                     | .                    | .                 | .              |
| SMG1     | .                 | .              | .                   | .                | .                           | .                        | .                     | .                  | .                        | 0.3250183             | 0.0047213            | .                 | yes            |
| SMIM12   | .                 | .              | .                   | .                | .                           | .                        | .                     | 0.7178358          | 6.13E-13                 | .                     | .                    | .                 | .              |
| SMIM20   | .                 | .              | .                   | .                | .                           | .                        | .                     | 0.7203948          | 4.65E-13                 | .                     | .                    | .                 | .              |
| SMIM7    | .                 | .              | 0.5433941           | 5.65E-07         | .                           | .                        | .                     | 0.3256745          | 0.0046331                | .                     | .                    | .                 | .              |
| SMO      | .                 | .              | .                   | .                | .                           | .                        | .                     | 0.4214235          | 0.0001846                | .                     | .                    | .                 | yes            |
| SMPD2    | .                 | .              | .                   | .                | .                           | .                        | .                     | 0.4935647          | 7.88E-06                 | .                     | .                    | .                 | .              |
| SMPDL3A  | .                 | .              | .                   | .                | .                           | .                        | .                     | 0.4496476          | 5.84E-05                 | .                     | .                    | .                 | .              |
| SMPX     | .                 | .              | .                   | .                | .                           | .                        | .                     | 0.8482416          | 1.46E-21                 | .                     | .                    | .                 | .              |
| SMS      | .                 | .              | .                   | .                | .                           | .                        | .                     | 0.4568975          | 4.28E-05                 | .                     | .                    | .                 | .              |
| SMTNL2   | .                 | .              | .                   | .                | .                           | .                        | .                     | 0.7717686          | 8.41E-16                 | .                     | .                    | .                 | .              |
| SMUG1    | .                 | .              | .                   | .                | .                           | .                        | .                     | 0.4541405          | 4.82E-05                 | .                     | .                    | .                 | .              |
| SMURF1   | .                 | .              | .                   | .                | .                           | .                        | .                     | 0.5180128          | 2.28E-06                 | .                     | .                    | .                 | .              |
| SMYD1    | .                 | .              | .                   | .                | .                           | .                        | .                     | 0.9612557          | 4.96E-42                 | .                     | .                    | .                 | .              |
| SMYD5    | .                 | .              | .                   | .                | 0.300994                    | 0.0091634                | .                     | 0.5612677          | 1.97E-07                 | .                     | .                    | .                 | .              |
| SNAI2    | .                 | .              | .                   | .                | 0.5612198                   | 1.98E-07                 | .                     | .                  | .                        | .                     | .                    | .                 | .              |
| SNAP23   | .                 | .              | .                   | .                | .                           | .                        | .                     | 0.5325354          | 1.04E-06                 | .                     | .                    | .                 | .              |
| SND1     | .                 | .              | .                   | .                | .                           | .                        | .                     | 0.7402005          | 4.86E-14                 | .                     | .                    | .                 | yes            |
| SNED1    | .                 | .              | .                   | .                | .                           | .                        | .                     | 0.498508           | 6.18E-06                 | .                     | .                    | .                 | .              |
| SNRNP200 | .                 | .              | 0.3519722           | 0.002103         | .                           | .                        | .                     | 0.42629            | 0.0001525                | .                     | .                    | .                 | yes            |
| SNRNP40  | .                 | .              | .                   | .                | .                           | .                        | .                     | 0.6841477          | 1.83E-11                 | .                     | .                    | .                 | .              |
| SNRNP70  | .                 | .              | .                   | .                | .                           | .                        | .                     | .                  | .                        | .                     | .                    | .                 | yes            |
| SNRPB    | .                 | .              | .                   | .                | .                           | .                        | .                     | .                  | .                        | .                     | .                    | .                 | yes            |
| SNRPD1   | .                 | .              | .                   | .                | .                           | .                        | .                     | 0.4425455          | 7.88E-05                 | .                     | .                    | .                 | .              |
| SNRPD3   | .                 | .              | .                   | .                | 0.3517163                   | 0.00212                  | .                     | .                  | .                        | .                     | .                    | .                 | yes            |
| SNRPN    | .                 | .              | .                   | .                | .                           | .                        | 0.6787275             | 3.02E-11           | .                        | .                     | .                    | .                 | .              |
| SNTA1    | .                 | .              | .                   | .                | .                           | .                        | .                     | 0.4831425          | 1.30E-05                 | .                     | .                    | .                 | .              |
| SNUPN    | .                 | .              | .                   | .                | .                           | .                        | .                     | .                  | .                        | 0.699389              | 4.17E-12             | .                 | .              |
| SNX14    | .                 | .              | .                   | .                | .                           | .                        | .                     | 0.571147           | 1.07E-07                 | .                     | .                    | .                 | .              |
| SNX17    | .                 | .              | .                   | .                | .                           | .                        | .                     | 0.4906974          | 9.06E-06                 | .                     | .                    | .                 | .              |
| SNX18    | .                 | .              | 0.3759983           | 0.0009619        | .                           | .                        | .                     | 0.3184016          | 0.0056973                | .                     | .                    | .                 | .              |
| SNX21    | .                 | .              | .                   | .                | .                           | .                        | .                     | 0.6287193          | 2.00E-09                 | .                     | .                    | .                 | .              |
| SNX3     | .                 | .              | 0.4386216           | 9.27E-05         | .                           | .                        | .                     | 0.3414641          | 0.0029068                | .                     | .                    | .                 | .              |
| SNX5     | .                 | .              | .                   | .                | 0.3470471                   | 0.0024509                | .                     | .                  | .                        | .                     | .                    | .                 | yes            |
| SOD1     | .                 | .              | 0.3717526           | 0.0011094        | .                           | .                        | .                     | 0.5963951          | 2.06E-08                 | .                     | .                    | .                 | .              |
| SOD2     | .                 | .              | 0.4096672           | 0.0002895        | .                           | .                        | .                     | .                  | .                        | .                     | .                    | .                 | .              |
| SON      | .                 | .              | .                   | .                | .                           | .                        | .                     | .                  | .                        | .                     | .                    | .                 | yes            |
| SORBS1   | .                 | .              | .                   | .                | .                           | .                        | .                     | 0.3393943          | 0.0030942                | 0.496084              | 6.97E-06             | .                 | .              |
| SORT1    | .                 | .              | .                   | .                | .                           | .                        | .                     | .                  | .                        | 0.5781982             | 6.86E-08             | .                 | .              |
| SOST     | 0.4160465         | 0.0002272      | .                   | .                | .                           | .                        | .                     | 0.467079           | 2.73E-05                 | .                     | .                    | .                 | .              |
| SOX11    | .                 | .              | .                   | .                | 0.4086753                   | 0.0003004                | .                     | .                  | .                        | .                     | .                    | .                 | yes            |
| SOX12    | .                 | .              | .                   | .                | .                           | .                        | .                     | .                  | .                        | .                     | .                    | .                 | yes            |
| SOX9     | .                 | .              | 0.4301277           | 0.0001308        | .                           | .                        | .                     | .                  | .                        | .                     | .                    | .                 | .              |
| SP1      | .                 | .              | .                   | .                | .                           | .                        | .                     | .                  | .                        | .                     | .                    | .                 | yes            |
| SPAG4    | .                 | .              | .                   | .                | .                           | .                        | .                     | 0.694341           | 6.87E-12                 | .                     | .                    | .                 | .              |
| SPARC    | .                 | .              | .                   | .                | .                           | .                        | .                     | .                  | .                        | .                     | .                    | .                 | yes            |
| SPAST    | .                 | .              | .                   | .                | .                           | .                        | .                     | 0.6335282          | 1.38E-09                 | .                     | .                    | .                 | .              |
| SPATA13  | .                 | .              | .                   | .                | .                           | .                        | .                     | 0.6235244          | 2.96E-09                 | .                     | .                    | .                 | .              |
| SPATA18  | .                 | .              | .                   | .                | .                           | .                        | .                     | 0.6814709          | 2.34E-11                 | .                     | .                    | .                 | .              |

| Gene       | Atrial Expression | P-value Atrial | AV-Canal Expression | P-value AV-Canal | Branchial Arches Expression | P-value Branchial Arches | Heart Tube Expression | P-value Heart Tube | Outflow Tract Expression | P-value Outflow Tract | Ventricle Expression | P-value Ventricle | DMP Expression |
|------------|-------------------|----------------|---------------------|------------------|-----------------------------|--------------------------|-----------------------|--------------------|--------------------------|-----------------------|----------------------|-------------------|----------------|
| SPATA24    | .                 | .              | .                   | .                | .                           | .                        | .                     | 0.489543           | 9.58E-06                 | .                     | .                    | .                 | .              |
| SPATA33    | .                 | .              | .                   | .                | .                           | .                        | .                     | 0.7018999          | 3.24E-12                 | .                     | .                    | .                 | .              |
| SPATC1L    | .                 | .              | .                   | .                | .                           | .                        | .                     | .                  | .                        | 0.5225675             | 1.79E-06             | .                 | .              |
| SPATS2     | .                 | .              | .                   | .                | .                           | .                        | .                     | 0.6285607          | 2.02E-09                 | .                     | .                    | .                 | .              |
| SPCS2      | .                 | .              | .                   | .                | .                           | .                        | .                     | 0.5496883          | 3.93E-07                 | .                     | .                    | .                 | .              |
| SPCS3      | .                 | .              | .                   | .                | .                           | .                        | .                     | 0.46456            | 3.05E-05                 | .                     | .                    | .                 | .              |
| SPEG       | .                 | .              | .                   | .                | .                           | .                        | .                     | 0.5383265          | 7.54E-07                 | .                     | .                    | .                 | .              |
| SPIN1      | .                 | .              | .                   | .                | .                           | .                        | .                     | 0.462139           | 3.40E-05                 | .                     | .                    | .                 | .              |
| SPINK5     | .                 | .              | .                   | .                | .                           | .                        | .                     | .                  | .                        | 0.6103436             | 7.77E-09             | .                 | .              |
| SPNS1      | .                 | .              | .                   | .                | 0.3303085                   | 0.0040507                | .                     | 0.6485302          | 4.16E-10                 | .                     | .                    | .                 | .              |
| SPOCK3     | .                 | .              | .                   | .                | .                           | .                        | .                     | .                  | .                        | 0.6957267             | 5.99E-12             | .                 | .              |
| SPON1      | .                 | 0.7912327      | 4.91E-17            | .                | .                           | .                        | .                     | .                  | .                        | .                     | .                    | .                 | .              |
| SPPL3      | .                 | .              | .                   | .                | .                           | .                        | .                     | 0.5125913          | 3.03E-06                 | .                     | .                    | .                 | .              |
| SPR        | .                 | .              | .                   | .                | .                           | .                        | .                     | 0.4617257          | 3.46E-05                 | .                     | .                    | .                 | .              |
| SPRYD3     | .                 | 0.4275733      | 0.0001449           | .                | .                           | .                        | .                     | .                  | .                        | .                     | .                    | .                 | .              |
| SPRYD7     | .                 | .              | .                   | .                | .                           | .                        | .                     | 0.4820368          | 1.37E-05                 | .                     | .                    | .                 | .              |
| SPSB3      | .                 | .              | .                   | .                | .                           | .                        | .                     | 0.5587495          | 2.30E-07                 | .                     | .                    | .                 | .              |
| SPSB4      | .                 | .              | .                   | .                | .                           | .                        | .                     | 0.526933           | 1.41E-06                 | .                     | .                    | .                 | .              |
| SPTAN1     | .                 | .              | .                   | .                | .                           | .                        | .                     | .                  | .                        | .                     | .                    | .                 | yes            |
| SPTBN1     | .                 | 0.4228853      | 0.0001743           | .                | .                           | .                        | .                     | 0.5491955          | 4.04E-07                 | .                     | .                    | .                 | yes            |
| SPTSSB     | .                 | .              | .                   | .                | .                           | .                        | .                     | .                  | .                        | 0.5332254             | 1.00E-06             | .                 | .              |
| SRC        | .                 | .              | .                   | .                | 0.4526084                   | 5.15E-05                 | .                     | .                  | .                        | .                     | .                    | .                 | .              |
| SRCRB4D    | .                 | .              | .                   | .                | .                           | .                        | .                     | .                  | .                        | 0.4638992             | 3.14E-05             | .                 | .              |
| SREBF2     | .                 | 0.3328769      | 0.0037567           | .                | .                           | .                        | .                     | 0.3082605          | 0.0075397                | .                     | .                    | .                 | yes            |
| SREK1      | .                 | 0.4742118      | 1.97E-05            | .                | .                           | .                        | .                     | 0.3209349          | 0.0053044                | .                     | .                    | .                 | .              |
| SRF        | .                 | .              | .                   | .                | .                           | .                        | .                     | 0.5671652          | 1.37E-07                 | .                     | .                    | .                 | .              |
| SRGAP2     | .                 | .              | .                   | .                | .                           | .                        | .                     | 0.4506149          | 5.61E-05                 | .                     | .                    | .                 | .              |
| SRM        | .                 | .              | .                   | .                | 0.5434041                   | 5.65E-07                 | .                     | .                  | .                        | .                     | .                    | .                 | .              |
| SRP68      | .                 | 0.3347062      | 0.0035591           | .                | .                           | .                        | .                     | 0.6539099          | 2.67E-10                 | .                     | .                    | .                 | .              |
| SRPK3      | .                 | .              | .                   | .                | .                           | .                        | .                     | 0.702276           | 3.12E-12                 | .                     | .                    | .                 | .              |
| SRRM1      | .                 | .              | .                   | .                | .                           | .                        | .                     | 0.4366976          | 0.0001003                | .                     | .                    | .                 | yes            |
| SRRM2      | .                 | .              | .                   | .                | .                           | .                        | .                     | .                  | .                        | .                     | .                    | .                 | yes            |
| SRR7       | .                 | .              | .                   | .                | .                           | .                        | .                     | 0.5895086          | 3.28E-08                 | .                     | .                    | .                 | yes            |
| SRSF1      | .                 | .              | .                   | .                | .                           | .                        | .                     | .                  | .                        | .                     | .                    | .                 | yes            |
| SRSF11     | .                 | .              | .                   | .                | .                           | .                        | .                     | 0.4574908          | 4.17E-05                 | .                     | .                    | .                 | yes            |
| SRSF2      | .                 | .              | .                   | .                | .                           | .                        | .                     | .                  | .                        | .                     | .                    | .                 | yes            |
| SRSF3      | .                 | .              | .                   | .                | .                           | .                        | .                     | .                  | .                        | .                     | .                    | .                 | yes            |
| SRSF6      | .                 | 0.3278855      | 0.0043465           | .                | .                           | .                        | .                     | .                  | .                        | .                     | .                    | .                 | yes            |
| SRSF7      | .                 | .              | .                   | .                | .                           | .                        | .                     | .                  | .                        | .                     | .                    | .                 | yes            |
| SS18L1     | .                 | .              | .                   | .                | .                           | .                        | .                     | .                  | .                        | 0.6949775             | 6.45E-12             | .                 | .              |
| SS18L2     | .                 | 0.4179757      | 0.000211            | .                | .                           | .                        | .                     | .                  | .                        | .                     | .                    | .                 | .              |
| SSB        | .                 | .              | .                   | .                | .                           | .                        | .                     | .                  | .                        | .                     | .                    | .                 | yes            |
| SSBP3      | .                 | .              | .                   | .                | .                           | .                        | .                     | .                  | .                        | .                     | .                    | .                 | yes            |
| SSBP4      | 0.504255          | 4.64E-06       | .                   | .                | .                           | .                        | .                     | .                  | .                        | .                     | .                    | .                 | .              |
| SSH1       | .                 | .              | .                   | .                | .                           | .                        | .                     | 0.3433985          | 0.0027409                | 0.4867175             | 1.10E-05             | .                 | .              |
| SSR1       | .                 | 0.4156345      | 0.0002308           | .                | .                           | .                        | .                     | 0.3100473          | 0.0071814                | .                     | .                    | .                 | yes            |
| SSR3       | .                 | 0.3671981      | 0.00129             | .                | .                           | .                        | .                     | 0.7805458          | 2.42E-16                 | .                     | .                    | .                 | yes            |
| SSRP1      | .                 | .              | .                   | .                | 0.3527494                   | 0.0020524                | .                     | 0.5435994          | 5.59E-07                 | .                     | .                    | .                 | yes            |
| SSU72      | .                 | .              | .                   | .                | .                           | .                        | .                     | 0.6106806          | 7.58E-09                 | .                     | .                    | .                 | .              |
| SSUH2      | .                 | 0.4004605      | 0.0004071           | .                | .                           | .                        | .                     | .                  | .                        | .                     | .                    | .                 | .              |
| ST13       | .                 | .              | .                   | .                | .                           | .                        | .                     | .                  | .                        | .                     | .                    | .                 | yes            |
| ST3GAL5    | .                 | 0.5310544      | 1.13E-06            | .                | .                           | .                        | .                     | .                  | .                        | .                     | .                    | .                 | .              |
| ST6GAL2    | .                 | .              | .                   | .                | .                           | .                        | .                     | .                  | .                        | 0.6980491             | 4.76E-12             | .                 | .              |
| ST6GALNAC4 | .                 | .              | .                   | .                | .                           | .                        | .                     | 0.7793861          | 2.86E-16                 | .                     | .                    | .                 | .              |
| ST6GALNAC5 | .                 | .              | .                   | .                | .                           | .                        | .                     | .                  | .                        | 0.7023218             | 3.10E-12             | .                 | .              |
| ST7L       | .                 | 0.4407147      | 8.50E-05            | .                | .                           | .                        | .                     | .                  | .                        | .                     | .                    | .                 | .              |
| STAP1      | .                 | .              | .                   | .                | .                           | .                        | .                     | 0.6354786          | 1.18E-09                 | .                     | .                    | .                 | .              |
| STAP2      | .                 | 0.4676347      | 2.66E-05            | .                | .                           | .                        | .                     | .                  | .                        | .                     | .                    | .                 | .              |
| STARD3     | .                 | .              | .                   | .                | .                           | 0.4484756                | 6.14E-05              | .                  | .                        | .                     | .                    | .                 | .              |
| STARD5     | .                 | .              | .                   | .                | .                           | .                        | .                     | 0.4438514          | 7.46E-05                 | .                     | .                    | .                 | .              |
| STEAP3     | .                 | 0.4692642      | 2.47E-05            | .                | .                           | .                        | .                     | .                  | .                        | .                     | .                    | .                 | .              |
| STIP1      | .                 | .              | .                   | .                | .                           | .                        | .                     | 0.6873633          | 1.35E-11                 | .                     | .                    | .                 | yes            |
| STK11      | .                 | 0.3951714      | 0.0004931           | .                | .                           | .                        | .                     | .                  | .                        | .                     | .                    | .                 | .              |
| STK11IP    | .                 | .              | .                   | .                | .                           | .                        | .                     | 0.4612756          | 3.53E-05                 | .                     | .                    | .                 | .              |
| STK16      | .                 | .              | .                   | .                | .                           | .                        | .                     | 0.6639714          | 1.13E-10                 | .                     | .                    | .                 | .              |
| STK24      | .                 | 0.4342648      | 0.0001107           | .                | .                           | .                        | .                     | .                  | .                        | .                     | .                    | .                 | .              |
| STK3       | .                 | 0.3430404      | 0.002771            | .                | .                           | .                        | .                     | 0.4937549          | 7.81E-06                 | .                     | .                    | .                 | .              |
| STK32A     | .                 | .              | .                   | .                | .                           | .                        | .                     | 0.6847042          | 1.73E-11                 | .                     | .                    | .                 | .              |
| STK38L     | .                 | .              | .                   | 0.4470651        | 6.52E-05                    | .                        | .                     | .                  | .                        | .                     | .                    | .                 | .              |
| STK4       | .                 | 0.3948264      | 0.0004992           | .                | .                           | .                        | .                     | .                  | .                        | .                     | .                    | .                 | .              |
| STRAP      | .                 | 0.4534732      | 4.96E-05            | .                | .                           | .                        | .                     | 0.4311193          | 0.0001257                | .                     | .                    | .                 | yes            |
| STRN3      | .                 | .              | .                   | .                | .                           | .                        | .                     | 0.5244537          | 1.62E-06                 | .                     | .                    | .                 | .              |
| STRN4      | .                 | 0.3827274      | 0.0007643           | .                | .                           | .                        | .                     | .                  | .                        | .                     | .                    | .                 | .              |
| STT3A      | .                 | .              | .                   | .                | .                           | .                        | .                     | 0.5191457          | 2.15E-06                 | .                     | .                    | .                 | yes            |
| STT3B      | .                 | 0.5833988      | 4.90E-08            | .                | .                           | .                        | .                     | 0.4102633          | 0.000283                 | .                     | .                    | .                 | yes            |



| Gene    | Atrial Expression | P-value Atrial | AV-Canal Expression | P-value AV-Canal | Branchial Arches Expression | P-value Branchial Arches | Heart Tube Expression | P-value Heart Tube | Outflow Tract Expression | P-value Outflow Tract | Ventricle Expression | P-value Ventricle | DMP Expression |
|---------|-------------------|----------------|---------------------|------------------|-----------------------------|--------------------------|-----------------------|--------------------|--------------------------|-----------------------|----------------------|-------------------|----------------|
| STX12   | .                 | .              | .                   | .                | .                           | .                        | .                     | 0.5482349          | 4.28E-07                 | .                     | .                    | .                 | .              |
| STX1A   | .                 | .              | .                   | .                | .                           | .                        | .                     | 0.6285487          | 2.02E-09                 | .                     | .                    | .                 | .              |
| STX1B   | .                 | .              | 0.3966498           | 0.0004675        | .                           | .                        | .                     | .                  | .                        | .                     | .                    | .                 | .              |
| STX2    | .                 | .              | .                   | .                | .                           | .                        | .                     | 0.643983           | 6.03E-10                 | .                     | .                    | .                 | .              |
| STXBP1  | .                 | .              | .                   | .                | .                           | .                        | .                     | 0.6227729          | 3.13E-09                 | .                     | .                    | .                 | .              |
| STXBP5L | .                 | .              | .                   | .                | .                           | .                        | .                     | .                  | .                        | 0.6397895             | 8.43E-10             | .                 | .              |
| STXBP6  | .                 | .              | .                   | .                | .                           | .                        | .                     | 0.520509           | 2.00E-06                 | .                     | .                    | .                 | .              |
| SUB1    | .                 | .              | .                   | .                | .                           | .                        | .                     | 0.6052411          | 1.12E-08                 | .                     | .                    | .                 | yes            |
| SUCLA2  | .                 | .              | 0.4329541           | 0.0001168        | .                           | .                        | .                     | .                  | .                        | .                     | .                    | .                 | .              |
| SUCLG1  | .                 | .              | .                   | .                | .                           | .                        | .                     | 0.5490355          | 4.08E-07                 | .                     | .                    | .                 | .              |
| SUDS3   | .                 | .              | .                   | .                | .                           | .                        | .                     | 0.7820522          | 1.94E-16                 | .                     | .                    | .                 | .              |
| SUGP1   | .                 | .              | .                   | .                | .                           | .                        | .                     | 0.6043032          | 1.19E-08                 | .                     | .                    | .                 | .              |
| SUGT1   | .                 | .              | 0.5587178           | 2.30E-07         | .                           | .                        | .                     | 0.3083914          | 0.0075129                | .                     | .                    | .                 | .              |
| SULF2   | .                 | .              | .                   | .                | .                           | .                        | .                     | .                  | .                        | .                     | .                    | .                 | yes            |
| SUMO3   | .                 | .              | .                   | .                | .                           | 0.3393089                | 0.0031022             | 0.3265424          | 0.0045187                | .                     | .                    | .                 | yes            |
| SUPT16H | .                 | .              | .                   | .                | .                           | .                        | .                     | .                  | .                        | .                     | .                    | .                 | yes            |
| SUPT5H  | .                 | .              | .                   | .                | .                           | .                        | .                     | 0.3665853          | 0.0013162                | .                     | .                    | .                 | yes            |
| SUPT6H  | .                 | .              | .                   | .                | .                           | .                        | .                     | .                  | .                        | .                     | .                    | .                 | yes            |
| SUPT7L  | .                 | .              | .                   | .                | .                           | .                        | .                     | 0.4471769          | 6.49E-05                 | .                     | .                    | .                 | .              |
| SURF1   | .                 | .              | .                   | .                | .                           | .                        | .                     | 0.4674216          | 2.68E-05                 | .                     | .                    | .                 | .              |
| SURF4   | .                 | .              | .                   | .                | .                           | 0.3070702                | 0.0077869             | 0.6656783          | 9.74E-11                 | .                     | .                    | .                 | yes            |
| SUV39H2 | .                 | .              | .                   | .                | .                           | .                        | .                     | .                  | .                        | 0.4799006             | 1.51E-05             | .                 | .              |
| SVEP1   | .                 | .              | .                   | .                | .                           | .                        | .                     | 0.461043           | 3.57E-05                 | .                     | .                    | .                 | .              |
| SYAP1   | .                 | .              | 0.5421056           | 6.08E-07         | .                           | .                        | .                     | 0.316425           | 0.0060216                | .                     | .                    | .                 | .              |
| SYCE1   | .                 | .              | .                   | .                | .                           | .                        | .                     | 0.441973           | 8.07E-05                 | .                     | .                    | .                 | .              |
| SYMPK   | .                 | .              | .                   | .                | .                           | .                        | .                     | .                  | .                        | 0.3798996             | 0.0008424            | .                 | yes            |
| SYN1    | .                 | .              | 0.3817769           | 0.0007898        | .                           | .                        | .                     | .                  | .                        | .                     | .                    | .                 | yes            |
| SYNCRIP | .                 | .              | .                   | .                | .                           | .                        | .                     | .                  | .                        | .                     | .                    | .                 | yes            |
| SYNE2   | .                 | .              | 0.3105494           | 0.0070834        | .                           | .                        | .                     | .                  | .                        | .                     | .                    | .                 | yes            |
| SYNE3   | .                 | .              | .                   | .                | .                           | .                        | .                     | .                  | .                        | 0.4828393             | 1.32E-05             | .                 | .              |
| SYNGAP1 | .                 | .              | .                   | .                | .                           | .                        | .                     | .                  | .                        | 0.6747229             | 4.35E-11             | .                 | .              |
| SYNPO2  | .                 | .              | .                   | .                | .                           | .                        | .                     | .                  | .                        | 0.6239755             | 2.86E-09             | .                 | .              |
| SYNPO2L | .                 | .              | 0.398837            | 0.0004319        | .                           | .                        | .                     | .                  | .                        | .                     | .                    | .                 | .              |
| SYTL5   | .                 | .              | .                   | .                | .                           | .                        | .                     | .                  | .                        | 0.5145955             | 2.73E-06             | .                 | .              |
| SZRD1   | .                 | .              | .                   | .                | .                           | .                        | .                     | 0.4422042          | 7.99E-05                 | .                     | .                    | .                 | .              |
| T       | .                 | .              | .                   | .                | 0.4555971                   | 4.53E-05                 | .                     | .                  | .                        | 0.3709964             | 0.0011377            | .                 | .              |
| TAB2    | .                 | .              | .                   | .                | .                           | .                        | .                     | 0.4100255          | 0.0002856                | .                     | .                    | .                 | yes            |
| TAB3    | .                 | .              | .                   | .                | .                           | .                        | .                     | 0.5359084          | 8.63E-07                 | .                     | .                    | .                 | .              |
| TACC3   | .                 | .              | 0.3154187           | 0.0061928        | .                           | .                        | .                     | .                  | .                        | .                     | .                    | .                 | yes            |
| TADA1   | .                 | .              | .                   | .                | .                           | .                        | .                     | 0.4819021          | 1.38E-05                 | .                     | .                    | .                 | .              |
| TAF10   | .                 | .              | 0.4405478           | 8.56E-05         | .                           | .                        | .                     | 0.5166035          | 2.46E-06                 | .                     | .                    | .                 | .              |
| TAF13   | .                 | .              | 0.4043771           | 0.0003526        | .                           | .                        | .                     | 0.4328596          | 0.0001172                | .                     | .                    | .                 | .              |
| TAF15   | .                 | .              | .                   | .                | 0.5173046                   | 2.37E-06                 | .                     | .                  | .                        | .                     | .                    | .                 | yes            |
| TAF5L   | .                 | .              | .                   | .                | .                           | .                        | .                     | 0.5093091          | 3.58E-06                 | .                     | .                    | .                 | .              |
| TAF8    | .                 | .              | .                   | .                | .                           | .                        | .                     | 0.5045946          | 4.56E-06                 | .                     | .                    | .                 | .              |
| TAF9    | .                 | .              | 0.4242103           | 0.0001655        | .                           | .                        | .                     | .                  | .                        | .                     | .                    | .                 | .              |
| TAGLN   | .                 | .              | .                   | .                | .                           | .                        | .                     | 0.8356651          | 2.04E-20                 | .                     | .                    | .                 | .              |
| TAGLN2  | .                 | .              | 0.4257903           | 0.0001555        | .                           | .                        | .                     | 0.5326357          | 1.04E-06                 | .                     | .                    | .                 | .              |
| TARDBP  | .                 | .              | .                   | .                | .                           | .                        | .                     | .                  | .                        | .                     | .                    | .                 | yes            |
| TARSL2  | .                 | .              | .                   | .                | .                           | .                        | .                     | .                  | .                        | 0.4396352             | 8.89E-05             | .                 | .              |
| TASP1   | .                 | .              | .                   | .                | .                           | .                        | .                     | 0.5783425          | 6.80E-08                 | .                     | .                    | .                 | .              |
| TAX1BP3 | .                 | .              | 0.4911952           | 8.85E-06         | .                           | .                        | .                     | .                  | .                        | .                     | .                    | .                 | .              |
| TBC1D1  | .                 | .              | .                   | .                | .                           | .                        | .                     | 0.5809293          | 5.75E-08                 | .                     | .                    | .                 | .              |
| TBC1D16 | .                 | .              | .                   | .                | .                           | .                        | .                     | .                  | .                        | .                     | .                    | .                 | yes            |
| TBC1D17 | .                 | .              | .                   | .                | .                           | .                        | .                     | 0.530553           | 1.16E-06                 | .                     | .                    | .                 | .              |
| TBC1D21 | .                 | .              | .                   | .                | .                           | .                        | .                     | .                  | .                        | 0.5219018             | 1.85E-06             | .                 | .              |
| TBC1D23 | .                 | .              | 0.4196482           | 0.0001978        | .                           | .                        | .                     | .                  | .                        | .                     | .                    | .                 | .              |
| TBC1D31 | .                 | .              | 0.4161775           | 0.0002261        | .                           | .                        | .                     | .                  | .                        | .                     | .                    | .                 | .              |
| TBC1D32 | .                 | .              | 0.3850885           | 0.0007042        | .                           | .                        | .                     | 0.3733525          | 0.0010516                | .                     | .                    | .                 | .              |
| TBC1D7  | .                 | .              | .                   | .                | .                           | .                        | .                     | 0.5814669          | 5.56E-08                 | .                     | .                    | .                 | .              |
| TBCB    | .                 | .              | 0.4052758           | 0.000341         | .                           | .                        | .                     | 0.5348136          | 9.17E-07                 | .                     | .                    | .                 | .              |
| TBCC    | .                 | .              | .                   | .                | .                           | .                        | .                     | 0.64235            | 6.87E-10                 | .                     | .                    | .                 | .              |
| TBCCD1  | .                 | .              | 0.3870782           | 0.000657         | .                           | .                        | .                     | .                  | .                        | .                     | .                    | .                 | .              |
| TBCE    | .                 | .              | .                   | .                | .                           | .                        | .                     | 0.4986687          | 6.13E-06                 | .                     | .                    | .                 | .              |
| TBL3    | .                 | .              | .                   | .                | 0.481584                    | 1.40E-05                 | .                     | .                  | .                        | .                     | .                    | .                 | .              |
| TBRG1   | .                 | .              | 0.3000606           | 0.0093926        | .                           | .                        | .                     | 0.5892617          | 3.33E-08                 | .                     | .                    | .                 | .              |
| TBX18   | .                 | .              | 0.5553393           | 2.82E-07         | .                           | .                        | .                     | .                  | .                        | .                     | .                    | .                 | .              |
| TBX20   | .                 | .              | 0.4861277           | 1.13E-05         | .                           | .                        | .                     | 0.6787031          | 3.03E-11                 | .                     | .                    | .                 | .              |
| TBX5    | .                 | .              | 0.4691368           | 2.48E-05         | .                           | .                        | .                     | .                  | .                        | .                     | .                    | .                 | .              |
| TCAP    | .                 | .              | 0.4352967           | 0.0001062        | .                           | .                        | .                     | .                  | .                        | 0.3663659             | 0.0013257            | .                 | .              |
| TCERG1  | .                 | .              | .                   | .                | .                           | .                        | .                     | .                  | .                        | .                     | .                    | .                 | yes            |
| TCF12   | .                 | .              | .                   | .                | .                           | .                        | .                     | .                  | .                        | .                     | .                    | .                 | yes            |
| TCF25   | .                 | .              | .                   | .                | .                           | .                        | .                     | .                  | .                        | .                     | .                    | .                 | yes            |
| TCF3    | .                 | .              | .                   | .                | 0.4028315                   | 0.0003732                | .                     | .                  | .                        | .                     | .                    | .                 | yes            |
| TCFL5   | .                 | .              | 0.4166087           | 0.0002224        | .                           | .                        | .                     | 0.3127359          | 0.0066704                | .                     | .                    | .                 | .              |

| Gene     | Atrial Expression | P-value Atrial | AV-Canal Expression | P-value AV-Canal | Branchial Arches Expression | P-value Branchial Arches | Heart Tube Expression | P-value Heart Tube | Outflow Tract Expression | P-value Outflow Tract | Ventricle Expression | P-value Ventricle | DMP Expression |
|----------|-------------------|----------------|---------------------|------------------|-----------------------------|--------------------------|-----------------------|--------------------|--------------------------|-----------------------|----------------------|-------------------|----------------|
| TCOF1    | .                 | .              | .                   | .                | .                           | .                        | .                     | .                  | .                        | .                     | .                    | .                 | yes            |
| TCP1     | .                 | .              | .                   | .                | .                           | .                        | .                     | 0.4441401          | 7.37E-05                 | .                     | .                    | .                 | yes            |
| TCP11L1  | .                 | .              | .                   | .                | .                           | .                        | .                     | 0.8392736          | 9.81E-21                 | .                     | .                    | .                 | .              |
| TCTA     | .                 | .              | 0.3825319           | 0.0007695        | .                           | .                        | .                     | .                  | .                        | .                     | .                    | .                 | .              |
| TCTEX1D1 | .                 | .              | .                   | .                | .                           | .                        | .                     | .                  | .                        | 0.6733311             | 4.94E-11             | .                 | .              |
| TDFGF1   | .                 | .              | .                   | .                | .                           | 0.3153111                | 0.0062113             | 0.5883124          | 3.55E-08                 | .                     | .                    | .                 | .              |
| TDRD7    | .                 | .              | .                   | .                | .                           | .                        | .                     | 0.6644034          | 1.09E-10                 | .                     | .                    | .                 | .              |
| TEAD1    | .                 | .              | .                   | .                | .                           | .                        | .                     | 0.3159063          | 0.0061093                | .                     | .                    | .                 | yes            |
| TEAD2    | .                 | .              | .                   | .                | 0.3483575                   | 0.0023536                | .                     | .                  | .                        | .                     | .                    | .                 | yes            |
| TEC      | .                 | .              | .                   | .                | .                           | .                        | .                     | .                  | .                        | 0.6222603             | 3.25E-09             | .                 | .              |
| TECR     | .                 | .              | .                   | .                | .                           | .                        | .                     | 0.550152           | 3.82E-07                 | .                     | .                    | .                 | .              |
| TECRL    | .                 | .              | 0.487697            | 1.05E-05         | .                           | .                        | .                     | .                  | .                        | .                     | .                    | .                 | .              |
| TECTA    | .                 | .              | .                   | .                | .                           | .                        | .                     | .                  | .                        | 0.6499077             | 3.72E-10             | .                 | .              |
| TENM3    | .                 | .              | .                   | .                | .                           | .                        | .                     | .                  | .                        | .                     | .                    | .                 | yes            |
| TESC     | .                 | .              | 0.4958579           | 7.05E-06         | .                           | .                        | .                     | .                  | .                        | .                     | .                    | .                 | .              |
| TEX10    | .                 | .              | .                   | .                | 0.4393959                   | 8.98E-05                 | .                     | .                  | .                        | .                     | .                    | .                 | .              |
| TEX13B   | .                 | .              | .                   | .                | .                           | .                        | .                     | 0.6435768          | 6.23E-10                 | .                     | .                    | .                 | .              |
| TEX261   | .                 | .              | 0.3916359           | 0.0005594        | .                           | .                        | .                     | .                  | .                        | .                     | .                    | .                 | .              |
| TEX35    | .                 | .              | .                   | .                | .                           | .                        | .                     | .                  | .                        | 0.4863062             | 1.12E-05             | .                 | .              |
| TEX37    | .                 | .              | .                   | .                | .                           | .                        | 0.5383782             | 7.51E-07           | .                        | .                     | .                    | .                 | .              |
| TFAM     | .                 | .              | 0.5318924           | 1.08E-06         | .                           | .                        | .                     | .                  | .                        | .                     | .                    | .                 | .              |
| TFCP2    | .                 | .              | .                   | .                | .                           | .                        | .                     | 0.5293221          | 1.24E-06                 | .                     | .                    | .                 | .              |
| TFE3     | .                 | .              | 0.2978981           | 0.0099431        | .                           | .                        | .                     | 0.5904735          | 3.07E-08                 | .                     | .                    | .                 | .              |
| TFEB     | .                 | .              | 0.4443645           | 7.30E-05         | .                           | .                        | .                     | .                  | .                        | .                     | .                    | .                 | .              |
| TFIP11   | .                 | .              | .                   | .                | .                           | .                        | .                     | 0.5662008          | 1.46E-07                 | .                     | .                    | .                 | .              |
| TFPI     | .                 | .              | 0.5346944           | 9.23E-07         | .                           | .                        | .                     | .                  | .                        | 0.3583841             | 0.0017168            | .                 | .              |
| TFRC     | .                 | .              | 0.3583438           | 0.001719         | .                           | .                        | .                     | .                  | .                        | .                     | .                    | .                 | yes            |
| TGFB1    | .                 | .              | 0.4618391           | 3.44E-05         | .                           | .                        | .                     | 0.4418036          | 8.13E-05                 | .                     | .                    | .                 | .              |
| TGFB2    | .                 | .              | .                   | .                | .                           | .                        | .                     | 0.4573081          | 4.20E-05                 | .                     | .                    | .                 | .              |
| TGFBR1   | .                 | .              | 0.3936721           | 0.0005203        | .                           | .                        | .                     | .                  | .                        | .                     | .                    | .                 | yes            |
| TGFBRAP1 | .                 | .              | 0.3238646           | 0.00488          | .                           | .                        | .                     | .                  | .                        | 0.5342322             | 9.47E-07             | .                 | .              |
| TGIF2    | .                 | .              | .                   | .                | .                           | .                        | .                     | 0.5635716          | 1.71E-07                 | .                     | .                    | .                 | .              |
| THBS1    | .                 | .              | 0.4722067           | 2.16E-05         | .                           | .                        | .                     | .                  | .                        | .                     | .                    | .                 | .              |
| THBS4    | .                 | .              | 0.4748727           | 1.91E-05         | .                           | .                        | .                     | .                  | .                        | .                     | .                    | .                 | .              |
| THOC1    | .                 | .              | .                   | .                | .                           | .                        | .                     | 0.5186448          | 2.20E-06                 | .                     | .                    | .                 | .              |
| THPO     | .                 | .              | .                   | .                | .                           | .                        | .                     | .                  | .                        | 0.646904              | 4.76E-10             | .                 | .              |
| THSD4    | .                 | .              | .                   | .                | .                           | .                        | .                     | 0.5758847          | 7.95E-08                 | .                     | .                    | .                 | .              |
| THUMP1   | .                 | .              | 0.3017046           | 0.0089921        | .                           | .                        | .                     | 0.5318337          | 1.08E-06                 | .                     | .                    | .                 | .              |
| TIMELESS | .                 | .              | 0.5079476           | 3.84E-06         | .                           | .                        | .                     | .                  | .                        | .                     | .                    | .                 | .              |
| TIMM10B  | .                 | .              | 0.3896377           | 0.0006005        | .                           | .                        | .                     | .                  | .                        | .                     | .                    | .                 | .              |
| TIMM13   | .                 | .              | .                   | .                | .                           | .                        | .                     | 0.6528975          | 2.90E-10                 | .                     | .                    | .                 | .              |
| TIMM17A  | .                 | .              | 0.3478262           | 0.0023927        | .                           | .                        | .                     | 0.4476613          | 6.36E-05                 | .                     | .                    | .                 | .              |
| TIMM21   | .                 | .              | 0.3806305           | 0.0008215        | .                           | .                        | .                     | 0.5224215          | 1.80E-06                 | .                     | .                    | .                 | .              |
| TIMM22   | .                 | .              | .                   | .                | .                           | .                        | .                     | 0.7887535          | 7.17E-17                 | .                     | .                    | .                 | .              |
| TIMM44   | .                 | .              | .                   | .                | .                           | .                        | .                     | 0.5742292          | 8.84E-08                 | .                     | .                    | .                 | .              |
| TIMM8A   | .                 | .              | 0.3942419           | 0.0005098        | 0.3740525                   | 0.0010271                | .                     | .                  | .                        | .                     | .                    | .                 | .              |
| TIMM8B   | .                 | .              | 0.4963735           | 6.87E-06         | .                           | .                        | .                     | .                  | .                        | .                     | .                    | .                 | .              |
| TIMM9    | .                 | .              | .                   | .                | .                           | .                        | .                     | 0.5108302          | 3.32E-06                 | .                     | .                    | .                 | .              |
| TJP1     | .                 | .              | .                   | .                | .                           | .                        | .                     | .                  | .                        | 0.6986481             | 4.49E-12             | .                 | yes            |
| TJP2     | .                 | .              | .                   | .                | .                           | .                        | .                     | 0.6591139          | 1.72E-10                 | .                     | .                    | .                 | .              |
| TKT      | .                 | .              | .                   | 0.4699228        | 2.40E-05                    | .                        | .                     | .                  | .                        | .                     | .                    | .                 | yes            |
| TLE3     | .                 | .              | 0.3994332           | 0.0004227        | .                           | .                        | .                     | .                  | .                        | .                     | .                    | .                 | yes            |
| TLN1     | .                 | .              | 0.3104186           | 0.0071088        | .                           | .                        | .                     | 0.3499843          | 0.0022377                | .                     | .                    | .                 | yes            |
| TLN2     | .                 | .              | .                   | .                | .                           | .                        | .                     | 0.5655494          | 1.52E-07                 | .                     | .                    | .                 | .              |
| TLX1     | .                 | .              | .                   | .                | .                           | .                        | .                     | 0.8978211          | 2.35E-27                 | .                     | .                    | .                 | .              |
| TM6SF1   | .                 | .              | .                   | .                | .                           | .                        | .                     | 0.691419           | 9.12E-12                 | .                     | .                    | .                 | .              |
| TM7SF3   | .                 | .              | .                   | .                | .                           | .                        | .                     | 0.5475529          | 4.45E-07                 | .                     | .                    | .                 | .              |
| TM9SF3   | .                 | .              | .                   | .                | .                           | .                        | .                     | 0.5601588          | 2.11E-07                 | .                     | .                    | .                 | yes            |
| TM9SF4   | .                 | .              | .                   | .                | .                           | .                        | .                     | 0.5557371          | 2.75E-07                 | .                     | .                    | .                 | .              |
| TMA16    | .                 | .              | .                   | 0.4628095        | 3.30E-05                    | .                        | .                     | .                  | .                        | .                     | .                    | .                 | .              |
| TMBIM1   | .                 | .              | 0.6071287           | 9.77E-09         | .                           | .                        | .                     | .                  | .                        | .                     | .                    | .                 | .              |
| TMBIM6   | .                 | .              | .                   | .                | .                           | .                        | .                     | .                  | .                        | .                     | .                    | .                 | yes            |
| TMC7     | .                 | .              | .                   | .                | .                           | 0.5831807                | 4.97E-08              | .                  | .                        | .                     | .                    | .                 | .              |
| TMCO1    | .                 | .              | 0.3820972           | 0.0007811        | .                           | .                        | .                     | .                  | .                        | .                     | .                    | .                 | .              |
| TMED10   | .                 | .              | .                   | .                | .                           | .                        | .                     | 0.5019624          | 5.20E-06                 | .                     | .                    | .                 | .              |
| TMED4    | .                 | .              | .                   | .                | .                           | .                        | .                     | 0.45               | 5.76E-05                 | .                     | .                    | .                 | .              |
| TMED9    | .                 | .              | .                   | .                | .                           | .                        | .                     | .                  | .                        | .                     | .                    | .                 | yes            |
| TMEM115  | .                 | .              | 0.4010219           | 0.0003989        | .                           | .                        | .                     | .                  | .                        | .                     | .                    | .                 | .              |
| TMEM116  | .                 | .              | .                   | .                | .                           | .                        | .                     | .                  | .                        | 0.5138791             | 2.83E-06             | .                 | .              |
| TMEM123  | .                 | .              | 0.6435244           | 6.26E-10         | .                           | .                        | .                     | .                  | .                        | .                     | .                    | .                 | .              |
| TMEM129  | .                 | .              | 0.4121996           | 0.0002631        | .                           | .                        | .                     | .                  | .                        | .                     | .                    | .                 | .              |
| TMEM132A | .                 | .              | .                   | .                | .                           | .                        | .                     | .                  | .                        | .                     | .                    | .                 | yes            |
| TMEM147  | .                 | .              | 0.3314486           | 0.0039178        | .                           | .                        | .                     | 0.6771626          | 3.49E-11                 | .                     | .                    | .                 | .              |
| TMEM14C  | 0.4102184         | 0.0002835      | .                   | .                | .                           | .                        | .                     | 0.6035037          | 1.26E-08                 | .                     | .                    | .                 | .              |
| TMEM150A | .                 | .              | .                   | .                | .                           | .                        | .                     | 0.4474484          | 6.42E-05                 | .                     | .                    | .                 | .              |



| Gene     | Atrial Expression | P-value Atrial | AV-Canal Expression | P-value AV-Canal | Branchial Arches Expression | P-value Branchial Arches | Heart Tube Expression | P-value Heart Tube | Outflow Tract Expression | P-value Outflow Tract | Ventricle Expression | P-value Ventricle | DMP Expression |
|----------|-------------------|----------------|---------------------|------------------|-----------------------------|--------------------------|-----------------------|--------------------|--------------------------|-----------------------|----------------------|-------------------|----------------|
| TPX2     | .                 | .              | 0.3761558           | 0.0009568        | .                           | .                        | .                     | .                  | .                        | .                     | .                    | .                 | yes            |
| TRA2A    | .                 | .              | .                   | .                | .                           | .                        | .                     | .                  | .                        | .                     | .                    | .                 | yes            |
| TRABD    | .                 | .              | .                   | .                | .                           | .                        | .                     | .                  | 0.4413199                | 8.29E-05              | .                    | .                 | .              |
| TRABD2B  | .                 | .              | .                   | .                | .                           | .                        | .                     | .                  | .                        | .                     | 0.5302927            | 1.18E-06          | .              |
| TRAF7    | .                 | .              | 0.3324028           | 0.0038095        | .                           | .                        | .                     | .                  | 0.4396412                | 8.89E-05              | .                    | .                 | .              |
| TRAFD1   | .                 | .              | .                   | .                | .                           | .                        | .                     | .                  | 0.4457508                | 6.89E-05              | .                    | .                 | .              |
| TRAK2    | .                 | .              | 0.4378514           | 9.57E-05         | .                           | .                        | .                     | .                  | .                        | .                     | .                    | .                 | .              |
| TRAM1    | .                 | .              | .                   | .                | .                           | .                        | .                     | .                  | 0.5403561                | 6.72E-07              | .                    | .                 | .              |
| TRAPPC1  | .                 | .              | 0.4320284           | 0.0001212        | .                           | .                        | .                     | .                  | .                        | .                     | .                    | .                 | .              |
| TRAPPC2L | .                 | .              | .                   | .                | .                           | .                        | .                     | .                  | 0.4441368                | 7.37E-05              | .                    | .                 | .              |
| TRAPPC6B | .                 | .              | .                   | .                | .                           | .                        | .                     | .                  | 0.6465532                | 4.89E-10              | .                    | .                 | .              |
| TREM2    | .                 | .              | .                   | .                | .                           | .                        | .                     | .                  | 0.5382116                | 7.59E-07              | .                    | .                 | .              |
| TREML1   | .                 | .              | 0.4077784           | 0.0003107        | .                           | .                        | .                     | .                  | .                        | .                     | .                    | .                 | .              |
| TREML2   | .                 | .              | 0.4824497           | 1.34E-05         | .                           | .                        | .                     | .                  | .                        | .                     | .                    | .                 | .              |
| TRIB2    | .                 | .              | 0.4365478           | 0.0001009        | .                           | .                        | .                     | .                  | .                        | .                     | .                    | .                 | .              |
| TRIL     | .                 | .              | .                   | .                | .                           | .                        | .                     | .                  | 0.5343893                | 9.39E-07              | .                    | .                 | .              |
| TRIM11   | .                 | .              | 0.3844693           | 0.0007196        | .                           | .                        | .                     | .                  | .                        | .                     | .                    | .                 | .              |
| TRIM13   | .                 | .              | 0.5217526           | 1.87E-06         | .                           | .                        | .                     | .                  | .                        | .                     | .                    | .                 | .              |
| TRIM15   | .                 | .              | .                   | .                | .                           | .                        | .                     | .                  | .                        | .                     | 0.6487101            | 4.10E-10          | .              |
| TRIM28   | .                 | .              | .                   | .                | .                           | .                        | .                     | .                  | 0.5337815                | 9.71E-07              | .                    | .                 | yes            |
| TRIM35   | .                 | .              | 0.3007524           | 0.0092222        | .                           | .                        | .                     | .                  | 0.3344506                | 0.0035861             | .                    | .                 | yes            |
| TRIM44   | .                 | .              | .                   | .                | .                           | .                        | .                     | .                  | 0.5625247                | 1.83E-07              | .                    | .                 | yes            |
| TRIM47   | .                 | .              | .                   | .                | .                           | .                        | .                     | .                  | 0.9002765                | 1.02E-27              | .                    | .                 | .              |
| TRIM5    | .                 | .              | 0.5588338           | 2.28E-07         | .                           | .                        | .                     | .                  | .                        | .                     | .                    | .                 | .              |
| TRIM54   | .                 | .              | .                   | .                | .                           | 0.4861813                | 1.13E-05              | .                  | .                        | .                     | .                    | .                 | .              |
| TRIM56   | .                 | .              | .                   | .                | .                           | .                        | .                     | .                  | .                        | .                     | 0.8903994            | 2.57E-26          | .              |
| TRIM63   | .                 | .              | 0.4410949           | 8.37E-05         | .                           | .                        | .                     | .                  | 0.6786968                | 3.03E-11              | .                    | .                 | .              |
| TRIM7    | .                 | .              | .                   | .                | .                           | .                        | .                     | .                  | .                        | .                     | 0.4717025            | 2.21E-05          | .              |
| TRIP12   | .                 | .              | .                   | .                | .                           | .                        | .                     | .                  | .                        | .                     | 0.5188719            | 2.18E-06          | yes            |
| TRIP13   | .                 | .              | .                   | .                | 0.4104733                   | 0.0002808                | 0.525609              | 1.52E-06           | .                        | .                     | .                    | .                 | .              |
| TRMT1    | .                 | .              | 0.3365086           | 0.0033735        | .                           | .                        | .                     | .                  | 0.4586263                | 3.97E-05              | .                    | .                 | .              |
| TRMT2A   | .                 | .              | 0.4810051           | 1.44E-05         | .                           | .                        | .                     | .                  | .                        | .                     | .                    | .                 | .              |
| TRMT61A  | .                 | .              | .                   | .                | .                           | .                        | 0.6481344             | 4.30E-10           | .                        | .                     | .                    | .                 | .              |
| TROAP    | .                 | .              | 0.5619386           | 1.89E-07         | .                           | .                        | .                     | .                  | .                        | .                     | .                    | .                 | .              |
| TRPC4    | .                 | .              | .                   | .                | 0.626319                    | 2.40E-09                 | .                     | .                  | .                        | .                     | .                    | .                 | .              |
| TRPC4AP  | .                 | .              | .                   | .                | .                           | .                        | .                     | .                  | 0.8181422                | 5.66E-19              | .                    | .                 | yes            |
| TRPC6    | .                 | .              | .                   | .                | .                           | .                        | 0.496486              | 6.83E-06           | .                        | .                     | .                    | .                 | .              |
| TRPM3    | .                 | .              | .                   | .                | .                           | .                        | .                     | .                  | .                        | .                     | 0.5086482            | 3.71E-06          | .              |
| TRPM7    | .                 | .              | 0.5080324           | 3.83E-06         | .                           | .                        | .                     | .                  | .                        | .                     | .                    | .                 | .              |
| TRRAP    | .                 | .              | .                   | .                | .                           | .                        | .                     | .                  | .                        | .                     | .                    | .                 | yes            |
| TSC2     | .                 | .              | .                   | .                | .                           | 0.4399644                | 8.77E-05              | .                  | .                        | .                     | .                    | .                 | .              |
| TSC22D1  | .                 | .              | 0.3210186           | 0.0052918        | .                           | .                        | .                     | .                  | 0.3100187                | 0.007187              | .                    | .                 | yes            |
| TSC22D4  | .                 | .              | 0.5327579           | 1.03E-06         | .                           | .                        | .                     | .                  | 0.4136131                | 0.0002493             | .                    | .                 | .              |
| TSEN15   | .                 | .              | 0.4070811           | 0.0003189        | .                           | .                        | .                     | .                  | 0.3420794                | 0.0028531             | .                    | .                 | .              |
| TSEN34   | .                 | .              | .                   | .                | 0.487592                    | 1.05E-05                 | .                     | .                  | .                        | .                     | .                    | .                 | .              |
| TSFM     | .                 | .              | .                   | .                | 0.600661                    | 1.54E-08                 | .                     | .                  | .                        | .                     | .                    | .                 | .              |
| TSG101   | .                 | .              | .                   | .                | 0.3964457                   | 0.000471                 | .                     | .                  | 0.5371712                | 8.04E-07              | .                    | .                 | .              |
| TSN      | .                 | .              | .                   | .                | .                           | .                        | .                     | .                  | 0.3797532                | 0.0008466             | .                    | .                 | yes            |
| TSPAN13  | .                 | .              | 0.4309633           | 0.0001265        | .                           | .                        | .                     | .                  | .                        | .                     | .                    | .                 | .              |
| TSPAN18  | .                 | .              | 0.3794258           | 0.0008561        | .                           | .                        | .                     | .                  | 0.5201973                | 2.03E-06              | .                    | .                 | .              |
| TSPAN3   | .                 | .              | .                   | .                | .                           | .                        | .                     | .                  | .                        | .                     | .                    | .                 | yes            |
| TSPAN6   | .                 | .              | 0.3894589           | 0.0006043        | .                           | .                        | .                     | .                  | 0.638                    | 9.72E-10              | .                    | .                 | .              |
| TSPAN7   | .                 | .              | .                   | .                | 0.4967627                   | 6.74E-06                 | .                     | .                  | .                        | .                     | .                    | .                 | .              |
| TSPAN9   | .                 | .              | 0.3903525           | 0.0005855        | .                           | .                        | .                     | .                  | .                        | .                     | .                    | .                 | .              |
| TSPYL1   | .                 | .              | 0.3681702           | 0.0012493        | .                           | .                        | .                     | .                  | 0.4754607                | 1.86E-05              | .                    | .                 | .              |
| TSPYL5   | .                 | .              | 0.3917179           | 0.0005578        | .                           | .                        | .                     | .                  | .                        | .                     | .                    | .                 | .              |
| TSSC4    | .                 | .              | .                   | .                | .                           | .                        | .                     | .                  | 0.5910573                | 2.95E-08              | .                    | .                 | .              |
| TTC1     | .                 | .              | .                   | .                | .                           | .                        | .                     | .                  | 0.4836875                | 1.27E-05              | .                    | .                 | .              |
| TTC14    | .                 | .              | .                   | .                | .                           | .                        | .                     | .                  | .                        | .                     | 0.6484776            | 4.18E-10          | .              |
| TTC16    | .                 | .              | .                   | .                | .                           | .                        | .                     | .                  | .                        | .                     | 0.5617067            | 1.92E-07          | .              |
| TTC19    | .                 | .              | 0.38014             | 0.0008355        | .                           | .                        | .                     | .                  | .                        | .                     | .                    | .                 | .              |
| TTC3     | .                 | .              | .                   | .                | .                           | .                        | .                     | .                  | .                        | .                     | .                    | .                 | yes            |
| TTC30A   | .                 | .              | 0.3781125           | 0.0008953        | .                           | .                        | .                     | .                  | 0.34569                  | 0.0025554             | .                    | .                 | .              |
| TTC33    | .                 | .              | .                   | .                | .                           | .                        | .                     | .                  | 0.5089421                | 3.65E-06              | .                    | .                 | .              |
| TTI2     | .                 | .              | .                   | .                | .                           | .                        | .                     | .                  | 0.6028279                | 1.32E-08              | .                    | .                 | .              |
| TTLL10   | .                 | .              | .                   | .                | .                           | .                        | .                     | .                  | .                        | .                     | 0.6167356            | 4.89E-09          | .              |
| TTLL12   | .                 | .              | .                   | .                | .                           | .                        | .                     | .                  | 0.4973769                | 6.54E-06              | .                    | .                 | .              |
| TTLL5    | .                 | .              | .                   | .                | .                           | .                        | .                     | .                  | 0.4400486                | 8.74E-05              | .                    | .                 | .              |
| TPPAL    | .                 | .              | .                   | .                | .                           | .                        | .                     | .                  | 0.5076049                | 3.91E-06              | .                    | .                 | .              |
| TTYH3    | .                 | .              | .                   | .                | 0.30935                     | 0.0073194                | .                     | .                  | .                        | .                     | .                    | .                 | yes            |
| TUBA1A   | .                 | .              | 0.3125699           | 0.0067011        | .                           | .                        | .                     | .                  | .                        | .                     | .                    | .                 | yes            |
| TUBAL3   | 0.4653305         | 2.95E-05       | .                   | .                | .                           | .                        | .                     | .                  | .                        | .                     | .                    | .                 | .              |
| TUBB     | .                 | .              | .                   | .                | .                           | .                        | .                     | .                  | 0.3974037                | 0.000455              | .                    | .                 | yes            |
| TUBG1    | .                 | .              | .                   | .                | .                           | .                        | .                     | .                  | 0.744751                 | 2.81E-14              | .                    | .                 | .              |
| TUFM     | .                 | .              | .                   | .                | .                           | .                        | .                     | .                  | 0.659687                 | 1.64E-10              | .                    | .                 | .              |

| Gene     | Atrial Expression | P-value Atrial | AV-Canal Expression | P-value AV-Canal | Branchial Arches Expression | P-value Branchial Arches | Heart Tube Expression | P-value Heart Tube | Outflow Tract Expression | P-value Outflow Tract | Ventricle Expression | P-value Ventricle | DMP Expression |
|----------|-------------------|----------------|---------------------|------------------|-----------------------------|--------------------------|-----------------------|--------------------|--------------------------|-----------------------|----------------------|-------------------|----------------|
| TULP2    | .                 | .              | .                   | .                | .                           | .                        | .                     | .                  | .                        | 0.6987472             | 4.44E-12             | .                 | .              |
| TULP4    | .                 | .              | .                   | .                | .                           | .                        | .                     | 0.5483741          | 4.24E-07                 | .                     | .                    | .                 | .              |
| TUSC2    | .                 | .              | 0.3145305           | 0.0063475        | .                           | .                        | .                     | 0.5947963          | 2.30E-08                 | .                     | .                    | .                 | .              |
| TWF2     | .                 | .              | 0.3425269           | 0.0028146        | .                           | .                        | .                     | 0.5984507          | 1.79E-08                 | .                     | .                    | .                 | .              |
| TWIST1   | .                 | .              | 0.4585267           | 3.98E-05         | 0.426439                    | 0.0001516                | .                     | .                  | .                        | .                     | .                    | .                 | .              |
| TXLNA    | .                 | .              | .                   | .                | .                           | .                        | .                     | 0.836054           | 1.89E-20                 | .                     | .                    | .                 | yes            |
| TXLNB    | .                 | .              | 0.4348669           | 0.0001081        | .                           | .                        | .                     | 0.6066798          | 1.01E-08                 | .                     | .                    | .                 | .              |
| TXNDC5   | .                 | .              | .                   | .                | .                           | .                        | .                     | 0.3491108          | 0.0022993                | .                     | .                    | .                 | yes            |
| TXNDC9   | .                 | .              | .                   | .                | .                           | .                        | .                     | 0.4614515          | 3.50E-05                 | .                     | .                    | .                 | .              |
| TXNL1    | .                 | .              | .                   | .                | 0.3743013                   | 0.0010186                | .                     | .                  | .                        | .                     | .                    | .                 | yes            |
| TXNL4A   | .                 | .              | .                   | .                | 0.363526                    | 0.0014545                | .                     | .                  | .                        | .                     | .                    | .                 | yes            |
| TXNRD1   | .                 | .              | .                   | .                | 0.450273                    | 5.69E-05                 | .                     | .                  | .                        | .                     | .                    | .                 | yes            |
| TYK2     | .                 | .              | .                   | .                | .                           | .                        | .                     | 0.7955368          | 2.52E-17                 | .                     | .                    | .                 | .              |
| TYMS     | .                 | .              | .                   | .                | .                           | .                        | .                     | 0.7295081          | 1.68E-13                 | .                     | .                    | .                 | .              |
| U2AF1L4  | .                 | .              | .                   | .                | .                           | .                        | .                     | 0.4599554          | 3.74E-05                 | .                     | .                    | .                 | .              |
| U2AF2    | .                 | .              | 0.3117111           | 0.0068613        | .                           | .                        | .                     | 0.3909553          | 0.0005731                | .                     | .                    | .                 | yes            |
| U2SURP   | .                 | .              | 0.3610087           | 0.001578         | .                           | .                        | .                     | .                  | .                        | .                     | .                    | .                 | yes            |
| UAP1     | .                 | .              | .                   | .                | .                           | .                        | .                     | 0.8415189          | 6.16E-21                 | .                     | .                    | .                 | .              |
| UBA1     | .                 | .              | 0.413946            | 0.0002462        | .                           | .                        | .                     | .                  | .                        | .                     | .                    | .                 | yes            |
| UBA2     | .                 | .              | .                   | .                | .                           | .                        | .                     | .                  | .                        | .                     | .                    | .                 | yes            |
| UBA7     | .                 | .              | .                   | .                | .                           | .                        | .                     | .                  | .                        | 0.6843307             | 1.79E-11             | .                 | .              |
| UBALD2   | .                 | .              | 0.5147221           | 2.71E-06         | .                           | .                        | .                     | .                  | .                        | .                     | .                    | .                 | .              |
| UBAP2    | .                 | .              | .                   | .                | .                           | .                        | .                     | .                  | .                        | .                     | .                    | .                 | yes            |
| UBAP2L   | .                 | .              | .                   | .                | .                           | .                        | .                     | .                  | .                        | .                     | .                    | .                 | yes            |
| UBASH3B  | .                 | .              | .                   | .                | .                           | .                        | .                     | 0.5951197          | 2.25E-08                 | .                     | .                    | .                 | .              |
| UBE2C    | .                 | .              | .                   | .                | .                           | .                        | .                     | 0.6072639          | 9.67E-09                 | .                     | .                    | .                 | .              |
| UBE2D1   | .                 | .              | 0.4001119           | 0.0004123        | .                           | .                        | .                     | 0.4441063          | 7.38E-05                 | .                     | .                    | .                 | .              |
| UBE2D3   | .                 | .              | .                   | .                | .                           | .                        | .                     | 0.4976184          | 6.46E-06                 | .                     | .                    | .                 | .              |
| UBE2F    | .                 | .              | 0.4025365           | 0.0003773        | 0.3290806                   | 0.0041983                | .                     | .                  | .                        | .                     | .                    | .                 | .              |
| UBE2G1   | .                 | .              | 0.4277411           | 0.0001439        | .                           | .                        | .                     | .                  | .                        | .                     | .                    | .                 | .              |
| UBE2G2   | .                 | .              | 0.498729            | 6.11E-06         | .                           | .                        | .                     | .                  | .                        | .                     | .                    | .                 | .              |
| UBE2H    | .                 | .              | 0.4017625           | 0.0003882        | .                           | .                        | .                     | 0.5575579          | 2.47E-07                 | .                     | .                    | .                 | .              |
| UBE2I    | .                 | .              | 0.3691864           | 0.0012081        | .                           | .                        | .                     | 0.5274485          | 1.38E-06                 | .                     | .                    | .                 | .              |
| UBE2J1   | .                 | .              | 0.403968            | 0.0003579        | .                           | .                        | .                     | .                  | .                        | .                     | .                    | .                 | .              |
| UBE2J2   | .                 | .              | 0.3870251           | 0.0006582        | .                           | .                        | .                     | .                  | .                        | .                     | .                    | .                 | .              |
| UBE2L3   | .                 | .              | .                   | .                | .                           | .                        | .                     | 0.642164           | 6.98E-10                 | .                     | .                    | .                 | .              |
| UBE2M    | .                 | .              | .                   | .                | .                           | .                        | .                     | 0.6892028          | 1.13E-11                 | .                     | .                    | .                 | .              |
| UBE2O    | .                 | .              | .                   | .                | .                           | .                        | .                     | 0.4561331          | 4.42E-05                 | .                     | .                    | .                 | .              |
| UBE2R2   | .                 | .              | 0.3743836           | 0.0010158        | .                           | .                        | .                     | .                  | .                        | .                     | .                    | .                 | yes            |
| UBE2S    | .                 | .              | 0.4729452           | 2.09E-05         | .                           | .                        | .                     | 0.6322477          | 1.52E-09                 | .                     | .                    | .                 | .              |
| UBE2Z    | .                 | .              | 0.335831            | 0.0034422        | .                           | .                        | .                     | 0.5518127          | 3.47E-07                 | .                     | .                    | .                 | .              |
| UBE3B    | .                 | .              | .                   | .                | .                           | .                        | .                     | 0.860691           | 8.44E-23                 | .                     | .                    | .                 | .              |
| UBE3C    | .                 | .              | 0.4046422           | 0.0003491        | .                           | .                        | .                     | 0.5869074          | 3.89E-08                 | .                     | .                    | .                 | .              |
| UBE3D    | .                 | .              | .                   | .                | .                           | .                        | .                     | 0.4741288          | 1.98E-05                 | .                     | .                    | .                 | .              |
| UBE4B    | .                 | .              | 0.419157            | 0.0002016        | .                           | .                        | .                     | 0.336757           | 0.0033486                | .                     | .                    | .                 | yes            |
| UBFD1    | .                 | .              | .                   | .                | .                           | .                        | .                     | 0.305471           | 0.0081304                | .                     | .                    | .                 | yes            |
| UBL3     | .                 | .              | 0.4882246           | 1.02E-05         | .                           | .                        | .                     | .                  | .                        | .                     | .                    | .                 | .              |
| UBQLN1   | .                 | .              | .                   | .                | 0.3359926                   | 0.0034257                | .                     | .                  | .                        | .                     | .                    | .                 | yes            |
| UBQLN2   | .                 | .              | .                   | .                | .                           | .                        | .                     | .                  | .                        | .                     | .                    | .                 | yes            |
| UBQLN3   | .                 | .              | .                   | .                | .                           | .                        | .                     | .                  | .                        | 0.5468088             | 4.64E-07             | .                 | .              |
| UBQLN4   | .                 | .              | .                   | .                | .                           | .                        | .                     | 0.589308           | 3.32E-08                 | .                     | .                    | .                 | yes            |
| UBR4     | .                 | .              | 0.354732            | 0.0019281        | .                           | .                        | .                     | .                  | .                        | .                     | .                    | .                 | yes            |
| UBR5     | .                 | .              | .                   | .                | .                           | .                        | .                     | .                  | .                        | 0.6451853             | 5.47E-10             | .                 | yes            |
| UBTF     | .                 | .              | .                   | .                | 0.3733499                   | 0.0010516                | .                     | .                  | .                        | .                     | .                    | .                 | yes            |
| UBXN2B   | .                 | .              | .                   | .                | .                           | .                        | .                     | .                  | .                        | 0.4630294             | 3.27E-05             | .                 | .              |
| UBXN4    | .                 | .              | .                   | .                | .                           | .                        | .                     | 0.5805659          | 5.89E-08                 | .                     | .                    | .                 | .              |
| UCHL3    | .                 | .              | .                   | .                | .                           | .                        | .                     | 0.5493136          | 4.02E-07                 | .                     | .                    | .                 | .              |
| UCK2     | .                 | .              | 0.4350525           | 0.0001073        | .                           | .                        | .                     | 0.4582365          | 4.03E-05                 | .                     | .                    | .                 | .              |
| UFC1     | .                 | .              | .                   | .                | .                           | .                        | .                     | 0.5741289          | 8.89E-08                 | .                     | .                    | .                 | .              |
| UFL1     | .                 | .              | .                   | .                | .                           | .                        | .                     | 0.4374463          | 9.73E-05                 | .                     | .                    | .                 | .              |
| UGGT1    | .                 | .              | .                   | .                | .                           | .                        | .                     | 0.4979271          | 6.36E-06                 | .                     | .                    | .                 | .              |
| UGP2     | .                 | .              | 0.4098959           | 0.000287         | .                           | .                        | .                     | .                  | .                        | .                     | .                    | .                 | .              |
| UGT1A4   | .                 | .              | .                   | .                | .                           | .                        | 0.5250173             | 1.57E-06           | .                        | .                     | .                    | .                 | .              |
| UGT2A2   | .                 | .              | .                   | .                | .                           | .                        | .                     | 0.4479724          | 6.27E-05                 | .                     | .                    | .                 | .              |
| UGT2B17  | .                 | .              | .                   | .                | .                           | .                        | .                     | 0.5477878          | 4.39E-07                 | .                     | .                    | .                 | .              |
| UHRF1    | .                 | .              | .                   | .                | 0.4557688                   | 4.49E-05                 | .                     | .                  | .                        | .                     | .                    | .                 | yes            |
| UHRF1BP1 | .                 | .              | 0.4044569           | 0.0003515        | .                           | .                        | .                     | 0.570118           | 1.14E-07                 | .                     | .                    | .                 | .              |
| ULK2     | .                 | .              | .                   | .                | .                           | .                        | .                     | .                  | .                        | 0.4979206             | 6.36E-06             | .                 | .              |
| UNC119   | .                 | .              | .                   | .                | .                           | .                        | .                     | 0.4743731          | 1.96E-05                 | .                     | .                    | .                 | .              |
| UNC5B    | .                 | .              | 0.5724877           | 9.86E-08         | .                           | .                        | .                     | .                  | .                        | .                     | .                    | .                 | .              |
| UNC80    | .                 | .              | .                   | .                | .                           | .                        | .                     | .                  | .                        | 0.4593682             | 3.84E-05             | .                 | .              |
| UPF1     | .                 | .              | .                   | .                | .                           | .                        | .                     | .                  | .                        | .                     | .                    | .                 | yes            |
| UPF3A    | .                 | .              | 0.48368             | 1.27E-05         | .                           | .                        | .                     | .                  | .                        | .                     | .                    | .                 | .              |
| UPK3B    | .                 | .              | 0.4549082           | 4.66E-05         | .                           | .                        | .                     | .                  | .                        | .                     | .                    | .                 | .              |
| UQCR11   | .                 | .              | 0.3503672           | 0.0022112        | .                           | .                        | .                     | 0.5521099          | 3.41E-07                 | .                     | .                    | .                 | .              |

| Gene    | Atrial Expression | P-value Atrial | AV-Canal Expression | P-value AV-Canal | Branchial Arches Expression | P-value Branchial Arches | Heart Tube Expression | P-value Heart Tube | Outflow Tract Expression | P-value Outflow Tract | Ventricle Expression | P-value Ventricle | DMP Expression |
|---------|-------------------|----------------|---------------------|------------------|-----------------------------|--------------------------|-----------------------|--------------------|--------------------------|-----------------------|----------------------|-------------------|----------------|
| UQCRB   | .                 | .              | 0.3749798           | 0.0009956        | .                           | .                        | 0.3019637             | 0.0089304          | 0.368371                 | 0.0012411             | .                    | .                 | .              |
| UQCRC1  | .                 | .              | .                   | .                | .                           | .                        | .                     | .                  | 0.4161624                | 0.0002262             | .                    | .                 | yes            |
| UQCRC2  | .                 | .              | 0.5422774           | 6.03E-07         | .                           | .                        | .                     | .                  | .                        | .                     | .                    | .                 | yes            |
| UQCRFS1 | .                 | .              | 0.5079487           | 3.84E-06         | .                           | .                        | .                     | .                  | 0.4932728                | 8.00E-06              | .                    | .                 | .              |
| UQCRH   | .                 | .              | 0.5352948           | 8.93E-07         | .                           | .                        | .                     | .                  | 0.5974366                | 1.92E-08              | .                    | .                 | .              |
| URB1    | .                 | .              | .                   | .                | .                           | .                        | .                     | .                  | 0.4549195                | 4.66E-05              | .                    | .                 | .              |
| USP10   | .                 | .              | .                   | .                | .                           | .                        | .                     | .                  | .                        | .                     | .                    | .                 | yes            |
| USP12   | .                 | .              | .                   | .                | .                           | .                        | .                     | .                  | 0.4452162                | 7.05E-05              | .                    | .                 | .              |
| USP13   | .                 | .              | 0.6002377           | 1.58E-08         | .                           | .                        | .                     | .                  | .                        | .                     | .                    | .                 | .              |
| USP19   | .                 | .              | .                   | .                | .                           | .                        | .                     | .                  | .                        | .                     | .                    | .                 | yes            |
| USP22   | .                 | .              | 0.3889645           | 0.0006149        | .                           | .                        | .                     | .                  | 0.3693222                | 0.0012027             | .                    | .                 | yes            |
| USP30   | .                 | .              | .                   | .                | .                           | .                        | .                     | .                  | 0.5811967                | 5.66E-08              | .                    | .                 | .              |
| USP36   | .                 | .              | .                   | .                | .                           | .                        | .                     | .                  | 0.552477                 | 3.34E-07              | .                    | .                 | .              |
| USP39   | .                 | .              | 0.4797535           | 1.52E-05         | .                           | .                        | .                     | .                  | 0.5474114                | 4.49E-07              | .                    | .                 | .              |
| USP40   | .                 | .              | .                   | .                | .                           | .                        | .                     | .                  | 0.8881744                | 5.09E-26              | .                    | .                 | .              |
| USP47   | .                 | .              | 0.3021422           | 0.008888         | .                           | .                        | .                     | .                  | .                        | .                     | .                    | .                 | yes            |
| USP49   | .                 | .              | .                   | .                | .                           | .                        | .                     | .                  | 0.6743032                | 4.52E-11              | .                    | .                 | .              |
| USP5    | .                 | .              | .                   | .                | .                           | .                        | .                     | .                  | 0.3932483                | 0.0005282             | .                    | .                 | yes            |
| USP7    | .                 | .              | .                   | .                | .                           | .                        | .                     | .                  | .                        | .                     | .                    | .                 | yes            |
| USP9X   | .                 | .              | .                   | .                | .                           | .                        | .                     | .                  | .                        | .                     | .                    | .                 | yes            |
| UTP18   | .                 | .              | 0.3998904           | 0.0004157        | .                           | .                        | .                     | .                  | 0.4946777                | 7.47E-06              | .                    | .                 | .              |
| UTP20   | .                 | .              | 0.441353            | 8.28E-05         | .                           | .                        | .                     | .                  | .                        | .                     | .                    | .                 | .              |
| UTP23   | .                 | .              | 0.3882659           | 0.0006302        | .                           | .                        | .                     | .                  | .                        | .                     | .                    | .                 | .              |
| UTP3    | .                 | .              | 0.5006403           | 5.56E-06         | .                           | .                        | .                     | .                  | 0.3520856                | 0.0020956             | .                    | .                 | .              |
| UTP6    | .                 | .              | .                   | .                | 0.4401191                   | 8.71E-05                 | .                     | .                  | 0.410511                 | 0.0002804             | .                    | .                 | .              |
| UXT     | .                 | .              | .                   | .                | .                           | .                        | .                     | .                  | 0.5198651                | 2.07E-06              | .                    | .                 | .              |
| VAMP3   | .                 | .              | .                   | .                | .                           | .                        | .                     | .                  | 0.5321502                | 1.06E-06              | .                    | .                 | .              |
| VANGL1  | .                 | .              | 0.3984363           | 0.0004383        | .                           | .                        | .                     | .                  | 0.3194254                | 0.0055355             | .                    | .                 | .              |
| VAPB    | .                 | .              | 0.3636726           | 0.0014476        | 0.3123011                   | 0.0067508                | .                     | .                  | 0.4787193                | 1.60E-05              | .                    | .                 | .              |
| VARS    | .                 | .              | .                   | .                | .                           | .                        | .                     | .                  | 0.582165                 | 5.31E-08              | .                    | .                 | yes            |
| VASH2   | .                 | .              | .                   | .                | .                           | .                        | .                     | .                  | 0.3267711                | 0.0044889             | 0.4666478            | 2.78E-05          | .              |
| VAT1    | .                 | .              | .                   | .                | .                           | .                        | .                     | .                  | 0.7748841                | 5.44E-16              | .                    | .                 | .              |
| VAV2    | .                 | .              | .                   | .                | .                           | .                        | .                     | .                  | .                        | .                     | 0.4519065            | 5.31E-05          | .              |
| VCAM1   | .                 | .              | 0.3774887           | 0.0009145        | .                           | .                        | .                     | .                  | 0.3925157                | 0.0005422             | .                    | .                 | .              |
| VCAN    | .                 | .              | 0.5126032           | 3.02E-06         | .                           | .                        | 0.389222              | 0.0006093          | .                        | .                     | .                    | .                 | yes            |
| VCL     | .                 | .              | 0.4352481           | 0.0001064        | .                           | .                        | .                     | .                  | .                        | .                     | .                    | .                 | yes            |
| VDAC1   | .                 | .              | .                   | .                | .                           | .                        | .                     | .                  | 0.7424438                | 3.71E-14              | .                    | .                 | yes            |
| VDAC2   | .                 | .              | .                   | .                | .                           | .                        | .                     | .                  | 0.7690542                | 1.22E-15              | .                    | .                 | .              |
| VEZFF1  | .                 | .              | .                   | .                | .                           | .                        | .                     | .                  | 0.6793091                | 2.86E-11              | .                    | .                 | .              |
| VIM     | .                 | .              | 0.5228256           | 1.77E-06         | .                           | .                        | .                     | .                  | 0.5471369                | 4.56E-07              | .                    | .                 | yes            |
| VIMP    | .                 | .              | .                   | .                | .                           | .                        | .                     | .                  | 0.5662537                | 1.45E-07              | .                    | .                 | .              |
| VNN1    | .                 | .              | .                   | .                | .                           | .                        | .                     | .                  | 0.5000772                | 5.72E-06              | .                    | .                 | .              |
| VPREB3  | .                 | .              | .                   | .                | .                           | .                        | 0.4798261             | 1.52E-05           | .                        | .                     | .                    | .                 | .              |
| VPS13D  | .                 | .              | .                   | .                | .                           | .                        | .                     | .                  | 0.5727333                | 9.71E-08              | .                    | .                 | .              |
| VPS16   | .                 | .              | .                   | .                | .                           | .                        | .                     | .                  | 0.6247964                | 2.69E-09              | .                    | .                 | .              |
| VPS28   | .                 | .              | 0.3901435           | 0.0005898        | .                           | .                        | .                     | .                  | .                        | .                     | .                    | .                 | .              |
| VPS35   | .                 | .              | .                   | .                | .                           | .                        | .                     | .                  | .                        | .                     | .                    | .                 | yes            |
| VPS37B  | .                 | .              | .                   | .                | .                           | .                        | .                     | .                  | 0.5376967                | 7.81E-07              | .                    | .                 | .              |
| VPS39   | .                 | .              | .                   | .                | .                           | .                        | .                     | .                  | 0.4431559                | 7.68E-05              | .                    | .                 | .              |
| VRK1    | .                 | .              | 0.4326285           | 0.0001183        | .                           | .                        | .                     | .                  | .                        | .                     | .                    | .                 | .              |
| VRK3    | .                 | .              | .                   | .                | .                           | .                        | .                     | .                  | 0.4639517                | 3.14E-05              | .                    | .                 | .              |
| VWA7    | .                 | .              | .                   | .                | .                           | .                        | 0.5344607             | 9.36E-07           | .                        | .                     | .                    | .                 | .              |
| WAPAL   | .                 | .              | .                   | .                | .                           | .                        | .                     | .                  | 0.4620814                | 3.41E-05              | .                    | .                 | .              |
| WARS    | .                 | .              | .                   | .                | .                           | .                        | .                     | .                  | 0.6272814                | 2.23E-09              | .                    | .                 | .              |
| WAS     | .                 | .              | 0.441686            | 8.17E-05         | .                           | .                        | .                     | .                  | .                        | .                     | .                    | .                 | .              |
| WASH1   | .                 | .              | 0.3756122           | 0.0009746        | .                           | .                        | .                     | .                  | .                        | .                     | .                    | .                 | .              |
| WASL    | .                 | .              | .                   | .                | .                           | .                        | .                     | .                  | 0.4391499                | 9.07E-05              | .                    | .                 | .              |
| WBP11   | .                 | .              | .                   | .                | 0.7177657                   | 6.18E-13                 | .                     | .                  | .                        | .                     | .                    | .                 | yes            |
| WBP1L   | .                 | .              | 0.4369813           | 9.91E-05         | .                           | .                        | .                     | .                  | .                        | .                     | .                    | .                 | .              |
| WBP5    | .                 | .              | .                   | .                | .                           | .                        | .                     | .                  | .                        | .                     | .                    | .                 | yes            |
| WBSCR22 | .                 | .              | .                   | .                | .                           | .                        | .                     | .                  | 0.6625104                | 1.28E-10              | .                    | .                 | .              |
| WBSCR27 | .                 | .              | .                   | .                | .                           | .                        | .                     | .                  | 0.6822525                | 2.18E-11              | .                    | .                 | .              |
| WDR1    | .                 | .              | .                   | .                | .                           | .                        | .                     | .                  | 0.624796                 | 2.69E-09              | .                    | .                 | yes            |
| WDR11   | .                 | .              | .                   | .                | .                           | .                        | .                     | .                  | 0.459343                 | 3.84E-05              | .                    | .                 | .              |
| WDR26   | .                 | .              | .                   | .                | .                           | .                        | .                     | .                  | .                        | .                     | .                    | .                 | yes            |
| WDR33   | .                 | .              | .                   | .                | .                           | .                        | .                     | .                  | .                        | .                     | 0.4547767            | 4.69E-05          | .              |
| WDR37   | .                 | .              | .                   | .                | .                           | .                        | .                     | .                  | .                        | .                     | 0.4451967            | 7.05E-05          | .              |
| WDR41   | .                 | .              | 0.42604             | 0.000154         | .                           | .                        | .                     | .                  | .                        | .                     | .                    | .                 | .              |
| WDR53   | .                 | .              | .                   | .                | .                           | .                        | .                     | .                  | 0.7236968                | 3.23E-13              | .                    | .                 | .              |
| WDR6    | .                 | .              | .                   | .                | .                           | .                        | .                     | .                  | .                        | .                     | .                    | .                 | yes            |
| WDR62   | .                 | .              | .                   | .                | .                           | .                        | .                     | .                  | 0.5926925                | 2.65E-08              | .                    | .                 | .              |
| WDR82   | .                 | .              | 0.3923091           | 0.0005462        | .                           | .                        | .                     | .                  | .                        | .                     | .                    | .                 | yes            |
| WDR83   | .                 | .              | .                   | .                | .                           | .                        | .                     | .                  | 0.7379985                | 6.30E-14              | .                    | .                 | .              |
| WDR89   | .                 | .              | .                   | .                | .                           | .                        | .                     | .                  | 0.4487857                | 6.06E-05              | .                    | .                 | .              |
| WDR90   | .                 | .              | .                   | .                | .                           | .                        | .                     | .                  | .                        | .                     | 0.4792821            | 1.56E-05          | .              |

| Gene     | Atrial Expression | P-value Atrial | AV-Canal Expression | P-value AV-Canal | Branchial Arches Expression | P-value Branchial Arches | Heart Tube Expression | P-value Heart Tube | Outflow Tract Expression | P-value Outflow Tract | Ventricle Expression | P-value Ventricle | DMP Expression |
|----------|-------------------|----------------|---------------------|------------------|-----------------------------|--------------------------|-----------------------|--------------------|--------------------------|-----------------------|----------------------|-------------------|----------------|
| WDR91    | .                 | .              | 0.3815038           | 0.0007972        | .                           | .                        | .                     | .                  | .                        | .                     | .                    | .                 | .              |
| WDR93    | .                 | .              | .                   | .                | .                           | .                        | .                     | 0.8369109          | 1.59E-20                 | .                     | .                    | .                 | .              |
| WDR96    | .                 | .              | .                   | .                | .                           | .                        | .                     | .                  | .                        | 0.6054039             | 1.10E-08             | .                 | .              |
| WDSUB1   | .                 | .              | 0.3799482           | 0.000841         | .                           | .                        | .                     | .                  | .                        | .                     | .                    | .                 | .              |
| WDTA1    | .                 | .              | .                   | .                | 0.3024239                   | 0.0088216                | 0.598516              | 1.78E-08           | .                        | .                     | .                    | .                 | .              |
| WEE1     | .                 | .              | .                   | .                | .                           | .                        | .                     | 0.5559617          | 2.71E-07                 | .                     | .                    | .                 | .              |
| WEE2     | .                 | .              | .                   | .                | .                           | 0.5173497                | 2.36E-06              | .                  | .                        | .                     | .                    | .                 | .              |
| WFDC8    | .                 | .              | .                   | .                | .                           | .                        | .                     | .                  | .                        | 0.6115539             | 7.12E-09             | .                 | .              |
| WFS1     | .                 | .              | 0.3969893           | 0.0004618        | .                           | .                        | .                     | 0.3515193          | 0.0021331                | .                     | .                    | .                 | .              |
| WHSC1    | .                 | .              | .                   | .                | 0.3849879                   | 0.0007067                | .                     | .                  | .                        | .                     | .                    | .                 | yes            |
| WHSC1L1  | .                 | .              | 0.4548106           | 4.68E-05         | .                           | .                        | .                     | .                  | .                        | .                     | .                    | .                 | .              |
| WIBG     | 0.5664623         | 1.44E-07       | .                   | .                | .                           | .                        | .                     | .                  | .                        | .                     | .                    | .                 | .              |
| WNK1     | .                 | .              | 0.3271556           | 0.0044394        | .                           | .                        | .                     | .                  | .                        | .                     | .                    | .                 | yes            |
| WNT9B    | .                 | .              | 0.5370333           | 8.10E-07         | .                           | .                        | .                     | .                  | .                        | .                     | .                    | .                 | .              |
| WRAP53   | .                 | .              | .                   | .                | .                           | .                        | .                     | 0.769643           | 1.13E-15                 | .                     | .                    | .                 | .              |
| WRB      | .                 | .              | .                   | .                | .                           | .                        | .                     | 0.560475           | 2.07E-07                 | .                     | .                    | .                 | .              |
| WSB1     | .                 | .              | .                   | .                | .                           | .                        | .                     | 0.3915675          | 0.0005608                | .                     | .                    | .                 | yes            |
| WSB2     | .                 | .              | 0.4123394           | 0.0002617        | .                           | .                        | .                     | 0.4066219          | 0.0003244                | .                     | .                    | .                 | .              |
| WT1      | .                 | .              | 0.4065107           | 0.0003257        | .                           | .                        | .                     | .                  | .                        | .                     | .                    | .                 | .              |
| WWC1     | .                 | .              | .                   | .                | .                           | .                        | .                     | .                  | .                        | 0.5643608             | 1.63E-07             | .                 | .              |
| WWC2     | .                 | .              | 0.4353187           | 0.0001061        | .                           | .                        | .                     | .                  | .                        | .                     | .                    | .                 | .              |
| WWP2     | .                 | .              | .                   | .                | .                           | .                        | .                     | 0.4788704          | 1.59E-05                 | .                     | .                    | .                 | .              |
| XIRP1    | .                 | .              | 0.5185974           | 2.21E-06         | .                           | .                        | .                     | .                  | .                        | .                     | .                    | .                 | .              |
| XK       | .                 | .              | 0.4871716           | 1.07E-05         | .                           | .                        | .                     | .                  | .                        | .                     | .                    | .                 | .              |
| XPINPEP1 | .                 | .              | 0.3995613           | 0.0004207        | .                           | .                        | .                     | 0.3742311          | 0.001021                 | .                     | .                    | .                 | .              |
| XPO1     | .                 | .              | .                   | .                | .                           | .                        | .                     | .                  | .                        | .                     | .                    | .                 | yes            |
| XPO6     | .                 | .              | .                   | .                | .                           | .                        | .                     | 0.4374515          | 9.73E-05                 | .                     | .                    | .                 | .              |
| XPO7     | .                 | .              | .                   | .                | .                           | .                        | .                     | .                  | .                        | .                     | .                    | .                 | yes            |
| XRCC3    | .                 | .              | .                   | .                | .                           | .                        | .                     | 0.4740661          | 1.98E-05                 | .                     | .                    | .                 | .              |
| XXYLT1   | .                 | .              | .                   | .                | .                           | .                        | .                     | 0.7064808          | 2.03E-12                 | .                     | .                    | .                 | .              |
| XYLT2    | .                 | .              | 0.3108149           | 0.0070321        | 0.4383513                   | 9.37E-05                 | .                     | .                  | .                        | .                     | .                    | .                 | .              |
| YAF2     | .                 | .              | 0.5794482           | 6.33E-08         | .                           | .                        | .                     | .                  | .                        | .                     | .                    | .                 | .              |
| YAP1     | .                 | .              | .                   | .                | .                           | .                        | .                     | 0.4230831          | 0.000173                 | .                     | .                    | .                 | yes            |
| YBX1     | .                 | .              | .                   | .                | .                           | .                        | .                     | 0.3476761          | 0.0024038                | .                     | .                    | .                 | yes            |
| YDJC     | .                 | .              | .                   | .                | .                           | .                        | .                     | 0.5509562          | 3.65E-07                 | .                     | .                    | .                 | .              |
| YEATS2   | .                 | .              | .                   | .                | .                           | .                        | .                     | .                  | .                        | .                     | .                    | .                 | yes            |
| YEATS4   | .                 | .              | 0.4116676           | 0.0002684        | .                           | .                        | .                     | .                  | .                        | .                     | .                    | .                 | .              |
| YIF1A    | .                 | .              | 0.4176043           | 0.000214         | .                           | .                        | .                     | 0.4470129          | 6.53E-05                 | .                     | .                    | .                 | .              |
| YIPF6    | .                 | .              | .                   | .                | .                           | .                        | .                     | 0.5641511          | 1.65E-07                 | .                     | .                    | .                 | .              |
| YKT6     | .                 | .              | .                   | .                | .                           | .                        | .                     | 0.7087147          | 1.61E-12                 | .                     | .                    | .                 | .              |
| YME1L1   | .                 | .              | .                   | .                | .                           | .                        | .                     | .                  | .                        | .                     | .                    | .                 | yes            |
| YPEL2    | .                 | .              | 0.4686394           | 2.54E-05         | .                           | .                        | .                     | 0.4706993          | 2.31E-05                 | .                     | .                    | .                 | .              |
| YPEL5    | .                 | .              | .                   | .                | .                           | .                        | .                     | 0.4647348          | 3.03E-05                 | .                     | .                    | .                 | .              |
| YTHDF1   | .                 | .              | .                   | .                | .                           | .                        | .                     | 0.6794537          | 2.83E-11                 | .                     | .                    | .                 | .              |
| YTHDF2   | .                 | .              | .                   | .                | .                           | .                        | .                     | 0.4708099          | 2.30E-05                 | .                     | .                    | .                 | .              |
| YWHAB    | .                 | .              | .                   | .                | .                           | .                        | .                     | 0.4178414          | 0.0002121                | .                     | .                    | .                 | yes            |
| YWHAE    | .                 | .              | .                   | .                | .                           | .                        | .                     | .                  | .                        | .                     | .                    | .                 | yes            |
| YWHAG    | .                 | .              | .                   | .                | .                           | .                        | .                     | 0.3197539          | 0.0054845                | .                     | .                    | .                 | yes            |
| YWHAH    | .                 | .              | 0.4670933           | 2.72E-05         | .                           | .                        | .                     | 0.5473673          | 4.50E-07                 | .                     | .                    | .                 | .              |
| YWHAQ    | .                 | .              | 0.3757              | 0.0009717        | .                           | .                        | .                     | 0.3650971          | 0.001382                 | .                     | .                    | .                 | .              |
| YWHAZ    | .                 | .              | .                   | .                | .                           | .                        | .                     | .                  | .                        | .                     | .                    | .                 | yes            |
| YY2      | .                 | .              | .                   | .                | .                           | .                        | .                     | 0.4606162          | 3.63E-05                 | .                     | .                    | .                 | .              |
| ZAN      | .                 | .              | .                   | .                | .                           | .                        | .                     | .                  | .                        | 0.5417719             | 6.20E-07             | .                 | .              |
| ZBTB1    | .                 | .              | 0.3771048           | 0.0009265        | .                           | .                        | .                     | .                  | .                        | .                     | .                    | .                 | .              |
| ZBTB25   | .                 | .              | .                   | .                | .                           | .                        | .                     | .                  | .                        | 0.518748              | 2.19E-06             | .                 | .              |
| ZBTB6    | .                 | .              | 0.460639            | 3.63E-05         | .                           | .                        | .                     | .                  | .                        | .                     | .                    | .                 | .              |
| ZBTB9    | .                 | .              | 0.4188316           | 0.0002041        | .                           | .                        | .                     | .                  | .                        | .                     | .                    | .                 | .              |
| ZC2HC1B  | .                 | .              | 0.4537426           | 4.90E-05         | .                           | .                        | .                     | .                  | .                        | .                     | .                    | .                 | .              |
| ZC3H12A  | .                 | .              | .                   | .                | .                           | .                        | .                     | .                  | .                        | 0.5320744             | 1.07E-06             | .                 | .              |
| ZC3H12D  | .                 | .              | 0.3169559           | 0.0059329        | .                           | .                        | .                     | 0.5678431          | 1.32E-07                 | .                     | .                    | .                 | .              |
| ZC3H4    | .                 | .              | .                   | .                | .                           | .                        | .                     | .                  | .                        | .                     | .                    | .                 | yes            |
| ZC3H7B   | .                 | .              | .                   | .                | .                           | .                        | .                     | 0.6930681          | 7.77E-12                 | .                     | .                    | .                 | yes            |
| ZC3HAV1L | .                 | .              | .                   | .                | .                           | .                        | .                     | .                  | .                        | .                     | .                    | .                 | yes            |
| ZC4H2    | .                 | .              | 0.3789288           | 0.0008708        | .                           | .                        | .                     | .                  | .                        | .                     | .                    | .                 | .              |
| ZCCHC11  | .                 | .              | .                   | .                | 0.4372586                   | 9.80E-05                 | .                     | .                  | .                        | .                     | .                    | .                 | yes            |
| ZCWPW2   | .                 | .              | 0.4034234           | 0.0003652        | .                           | .                        | .                     | .                  | .                        | .                     | .                    | .                 | .              |
| ZDHH14   | .                 | .              | .                   | .                | 0.496443                    | 6.85E-06                 | .                     | 0.3443756          | 0.0026604                | .                     | .                    | .                 | .              |
| ZDHH5    | .                 | .              | .                   | .                | .                           | .                        | .                     | 0.6671505          | 8.56E-11                 | .                     | .                    | .                 | .              |
| ZDHH8    | .                 | .              | 0.3820146           | 0.0007833        | 0.3308838                   | 0.0039831                | .                     | .                  | .                        | .                     | .                    | .                 | .              |
| ZDHH9    | .                 | .              | .                   | .                | .                           | .                        | .                     | 0.6988973          | 4.38E-12                 | .                     | .                    | .                 | .              |
| ZFAND4   | .                 | .              | .                   | .                | .                           | .                        | .                     | .                  | .                        | 0.5574623             | 2.48E-07             | .                 | .              |
| ZFAT     | .                 | .              | .                   | .                | .                           | .                        | .                     | .                  | .                        | 0.7251792             | 2.74E-13             | .                 | .              |
| ZFH2     | .                 | .              | .                   | .                | 0.4511176                   | 5.49E-05                 | .                     | .                  | .                        | .                     | .                    | .                 | .              |
| ZFP36L1  | .                 | .              | 0.3431612           | 0.0027608        | .                           | .                        | .                     | .                  | .                        | .                     | .                    | .                 | yes            |
| ZFP62    | .                 | .              | .                   | .                | .                           | .                        | .                     | 0.5369678          | 8.13E-07                 | .                     | .                    | .                 | .              |

| Gene     | Atrial Expression | P-value Atrial | AV-Canal Expression | P-value AV-Canal | Branchial Arches Expression | P-value Branchial Arches | Heart Tube Expression | P-value Heart Tube | Outflow Tract Expression | P-value Outflow Tract | Ventricle Expression | P-value Ventricle | DMP Expression |
|----------|-------------------|----------------|---------------------|------------------|-----------------------------|--------------------------|-----------------------|--------------------|--------------------------|-----------------------|----------------------|-------------------|----------------|
| ZFP91    | .                 | .              | 0.3469756           | 0.0024563        | .                           | .                        | .                     | .                  | 0.6082538                | 9.02E-09              | .                    | .                 | .              |
| ZFPM1    | .                 | .              | 0.3059599           | 0.008024         | .                           | .                        | .                     | .                  | 0.6894491                | 1.10E-11              | .                    | .                 | .              |
| ZFR      | .                 | .              | .                   | .                | .                           | .                        | .                     | .                  | 0.4946024                | 7.49E-06              | .                    | .                 | yes            |
| ZFYVE1   | .                 | .              | .                   | .                | .                           | .                        | .                     | .                  | 0.4385337                | 9.30E-05              | .                    | .                 | .              |
| ZFYVE21  | .                 | .              | .                   | .                | .                           | .                        | .                     | .                  | 0.4934413                | 7.93E-06              | .                    | .                 | .              |
| ZHX2     | .                 | .              | .                   | .                | .                           | .                        | .                     | .                  | 0.5335501                | 9.84E-07              | .                    | .                 | .              |
| ZKSCAN5  | .                 | .              | 0.3895079           | 0.0006032        | .                           | .                        | .                     | .                  | .                        | .                     | .                    | .                 | .              |
| ZMAT5    | .                 | .              | 0.3791326           | 0.0008647        | .                           | .                        | .                     | .                  | .                        | .                     | .                    | .                 | .              |
| ZMIZ1    | .                 | .              | .                   | .                | .                           | .                        | .                     | .                  | .                        | .                     | .                    | .                 | yes            |
| ZMPSTE24 | .                 | .              | 0.411074            | 0.0002745        | .                           | .                        | .                     | .                  | 0.5154694                | 2.61E-06              | .                    | .                 | .              |
| ZMYM1    | .                 | .              | .                   | .                | .                           | .                        | .                     | .                  | 0.4797489                | 1.53E-05              | .                    | .                 | .              |
| ZMYM3    | .                 | .              | .                   | .                | .                           | .                        | .                     | .                  | 0.32035                  | 0.0053929             | 0.5057015            | 4.31E-06          | .              |
| ZMYM4    | .                 | .              | 0.4697356           | 2.42E-05         | .                           | .                        | .                     | .                  | .                        | .                     | .                    | .                 | .              |
| ZMYND19  | .                 | .              | .                   | .                | 0.3256194                   | 0.0046404                | .                     | .                  | 0.7081181                | 1.71E-12              | .                    | .                 | .              |
| ZNF106   | .                 | .              | .                   | .                | .                           | .                        | .                     | .                  | .                        | .                     | .                    | .                 | yes            |
| ZNF143   | .                 | .              | .                   | .                | .                           | .                        | .                     | .                  | 0.6732595                | 4.97E-11              | .                    | .                 | .              |
| ZNF146   | .                 | .              | .                   | .                | .                           | 0.4640154                | 3.13E-05              | .                  | .                        | .                     | .                    | .                 | .              |
| ZNF207   | .                 | .              | .                   | .                | .                           | .                        | .                     | .                  | 0.541599                 | 6.26E-07              | .                    | .                 | yes            |
| ZNF219   | .                 | .              | .                   | .                | .                           | .                        | .                     | .                  | .                        | 0.5598246             | 2.15E-07             | .                 | .              |
| ZNF22    | .                 | .              | 0.4279163           | 0.0001429        | .                           | .                        | .                     | .                  | .                        | .                     | .                    | .                 | .              |
| ZNF259   | .                 | .              | .                   | .                | .                           | .                        | .                     | .                  | 0.5021981                | 5.14E-06              | .                    | .                 | .              |
| ZNF266   | .                 | .              | .                   | .                | .                           | .                        | .                     | .                  | .                        | .                     | .                    | .                 | yes            |
| ZNF275   | .                 | .              | 0.3804557           | 0.0008265        | .                           | .                        | .                     | .                  | .                        | .                     | .                    | .                 | .              |
| ZNF280B  | .                 | .              | .                   | .                | .                           | .                        | .                     | .                  | 0.5591044                | 2.25E-07              | .                    | .                 | .              |
| ZNF281   | .                 | .              | .                   | .                | .                           | .                        | .                     | .                  | 0.7414216                | 4.20E-14              | .                    | .                 | .              |
| ZNF330   | .                 | .              | .                   | .                | 0.4393142                   | 9.01E-05                 | .                     | .                  | .                        | .                     | .                    | .                 | .              |
| ZNF334   | .                 | .              | .                   | .                | 0.4812147                   | 1.42E-05                 | .                     | .                  | .                        | .                     | .                    | .                 | .              |
| ZNF335   | .                 | .              | .                   | .                | .                           | .                        | .                     | .                  | 0.4904921                | 9.15E-06              | .                    | .                 | .              |
| ZNF346   | .                 | .              | 0.4512939           | 5.45E-05         | .                           | .                        | .                     | .                  | .                        | .                     | .                    | .                 | .              |
| ZNF354B  | .                 | .              | .                   | .                | 0.463105                    | 3.26E-05                 | .                     | .                  | .                        | .                     | .                    | .                 | .              |
| ZNF384   | .                 | .              | .                   | .                | .                           | .                        | .                     | .                  | 0.8129315                | 1.42E-18              | .                    | .                 | .              |
| ZNF394   | .                 | .              | .                   | .                | .                           | .                        | .                     | .                  | 0.5338454                | 9.68E-07              | .                    | .                 | .              |
| ZNF397   | .                 | .              | .                   | .                | 0.4610856                   | 3.56E-05                 | .                     | .                  | .                        | .                     | .                    | .                 | .              |
| ZNF423   | .                 | .              | .                   | .                | 0.4827599                   | 1.32E-05                 | .                     | .                  | .                        | .                     | .                    | .                 | .              |
| ZNF445   | .                 | .              | .                   | .                | .                           | .                        | .                     | .                  | .                        | .                     | .                    | .                 | yes            |
| ZNF446   | .                 | .              | .                   | .                | 0.5056948                   | 4.31E-06                 | .                     | .                  | .                        | .                     | .                    | .                 | .              |
| ZNF462   | .                 | .              | .                   | .                | .                           | .                        | .                     | .                  | .                        | 0.3171232             | 0.0059052            | yes               | .              |
| ZNF496   | .                 | .              | .                   | .                | .                           | .                        | .                     | .                  | .                        | 0.4898942             | 9.42E-06             | .                 | .              |
| ZNF511   | .                 | .              | .                   | .                | .                           | .                        | .                     | .                  | 0.4923552                | 8.36E-06              | .                    | .                 | .              |
| ZNF516   | .                 | .              | .                   | .                | .                           | .                        | .                     | .                  | .                        | .                     | .                    | .                 | yes            |
| ZNF521   | .                 | .              | .                   | .                | 0.5108059                   | 3.32E-06                 | .                     | .                  | .                        | .                     | .                    | .                 | .              |
| ZNF563   | .                 | .              | 0.4599157           | 3.75E-05         | .                           | .                        | .                     | .                  | .                        | .                     | .                    | .                 | .              |
| ZNF565   | .                 | .              | 0.4200559           | 0.0001947        | .                           | .                        | .                     | .                  | .                        | .                     | .                    | .                 | .              |
| ZNF580   | .                 | .              | 0.3754021           | 0.0009815        | .                           | .                        | .                     | .                  | .                        | .                     | .                    | .                 | .              |
| ZNF585A  | .                 | .              | .                   | .                | .                           | .                        | .                     | .                  | .                        | 0.5111884             | 3.25E-06             | .                 | .              |
| ZNF592   | .                 | .              | .                   | .                | .                           | .                        | .                     | .                  | .                        | 0.5941428             | 2.40E-08             | .                 | .              |
| ZNF593   | .                 | .              | .                   | .                | 0.3397692                   | 0.0030595                | .                     | .                  | 0.5505386                | 3.74E-07              | .                    | .                 | .              |
| ZNF609   | .                 | .              | .                   | .                | .                           | .                        | .                     | .                  | .                        | 0.5863987             | 4.03E-08             | .                 | .              |
| ZNF624   | .                 | .              | .                   | .                | .                           | .                        | .                     | .                  | .                        | 0.6126325             | 6.59E-09             | .                 | .              |
| ZNF628   | .                 | .              | .                   | .                | .                           | .                        | .                     | .                  | 0.5338819                | 9.66E-07              | .                    | .                 | .              |
| ZNF629   | .                 | .              | .                   | .                | .                           | .                        | .                     | .                  | .                        | 0.6643822             | 1.09E-10             | .                 | .              |
| ZNF664   | .                 | .              | .                   | .                | .                           | .                        | .                     | .                  | .                        | .                     | .                    | .                 | yes            |
| ZNF668   | .                 | .              | 0.4189183           | 0.0002034        | .                           | .                        | .                     | .                  | .                        | .                     | .                    | .                 | .              |
| ZNF687   | .                 | .              | 0.434889            | 0.000108         | .                           | .                        | .                     | .                  | 0.3490564                | 0.0023032             | .                    | .                 | .              |
| ZNF697   | .                 | .              | .                   | .                | .                           | .                        | .                     | .                  | .                        | 0.5490689             | 4.07E-07             | .                 | .              |
| ZNF710   | .                 | .              | .                   | .                | .                           | .                        | .                     | .                  | 0.5772339                | 7.30E-08              | .                    | .                 | .              |
| ZNF800   | .                 | .              | .                   | .                | .                           | .                        | .                     | .                  | .                        | 0.6110478             | 7.39E-09             | .                 | .              |
| ZNF804B  | .                 | .              | 0.5524928           | 3.33E-07         | .                           | .                        | .                     | .                  | 0.5566647                | 2.60E-07              | .                    | .                 | .              |
| ZNF827   | .                 | .              | .                   | .                | .                           | .                        | .                     | .                  | 0.5321013                | 1.07E-06              | .                    | .                 | .              |
| ZNF846   | .                 | .              | .                   | .                | .                           | .                        | .                     | .                  | .                        | 0.5302543             | 1.18E-06             | .                 | .              |
| ZNF850   | .                 | .              | .                   | .                | .                           | .                        | .                     | .                  | 0.4599253                | 3.75E-05              | .                    | .                 | .              |
| ZNF90    | .                 | .              | .                   | .                | .                           | .                        | .                     | .                  | .                        | 0.5457422             | 4.94E-07             | .                 | .              |
| ZNHIT6   | .                 | .              | .                   | .                | .                           | .                        | .                     | .                  | 0.5669647                | 1.39E-07              | .                    | .                 | .              |
| ZNRF1    | .                 | .              | .                   | .                | .                           | .                        | .                     | .                  | 0.7391338                | 5.51E-14              | .                    | .                 | .              |
| ZRANB2   | .                 | .              | .                   | .                | .                           | .                        | .                     | .                  | .                        | .                     | .                    | .                 | yes            |
| ZSCAN26  | .                 | .              | .                   | .                | .                           | .                        | .                     | .                  | 0.5471307                | 4.56E-07              | .                    | .                 | .              |
| ZSCAN29  | .                 | .              | .                   | .                | 0.4699685                   | 2.39E-05                 | .                     | .                  | .                        | .                     | .                    | .                 | .              |
| ZSWIM3   | .                 | .              | .                   | .                | .                           | .                        | .                     | .                  | 0.7053135                | 2.29E-12              | .                    | .                 | .              |
| ZSWIM8   | .                 | .              | .                   | .                | .                           | .                        | .                     | .                  | .                        | .                     | .                    | .                 | yes            |
| ZWINT    | .                 | .              | 0.4692535           | 2.47E-05         | .                           | .                        | .                     | .                  | 0.4877247                | 1.05E-05              | .                    | .                 | .              |
| ZYX      | .                 | .              | 0.4327482           | 0.0001178        | .                           | .                        | .                     | .                  | 0.4733904                | 2.05E-05              | .                    | .                 | .              |
