# Supplementary material for: De Novo and Rare Variants at Multiple Loci Support the Oligogenic Origins of Atrioventricular Septal Heart Defects
Source: PubMed Central journal article supplement (PMC4825975; doi:10.1371/journal.pgen.1005963), 2016-04-08
Supplement: pgen.1005963.s016.pdf [file pgen.1005963.s016.pdf]

**Table S9. 13 Well Known Cardiac Developmental Genes are Appropriately Localized to Developmental Compartment by Unsupervised Weighted Gene Co-Expression Network Analysis of SAGE expression data**

| <b>Gene</b>   | <b>Associated Malformation</b>         | <b>Developmental Compartment</b> |
|---------------|----------------------------------------|----------------------------------|
| <i>Jag1</i>   | Pulmonary Stenosis/Alagille Syndrome   | outflow tract                    |
| <i>Ptpn11</i> | Pulmonary Stenosis/Tetralogy of Fallot | outflow tract                    |
| <i>Hey2</i>   | Ventricular Septal Defect              | outflow tract                    |
| <i>Tbx5</i>   | Chamber Septation/Holt-Oram Syndrome   | av-canal                         |
| <i>Gata4</i>  | ASD/VSD/AVSD                           | av-canal                         |
| <i>Nkx2-5</i> | ASD/VSD/AVSD                           | av-canal                         |
| <i>Hand2</i>  | Abnormal endocardial cushions          | outflow tract                    |
| <i>Myh7</i>   | Ebstein's Anomaly/ASD/VSD/BaV          | outflow tract                    |
| <i>MesP1</i>  | Key Mesodermal Progenitor              | av-canal                         |
| <i>Creld1</i> | AVSD                                   | av-canal                         |
| <i>Kmt2d</i>  | VSD/Kabuki Syndrome                    | outflow tract                    |
| <i>Myh6</i>   | ASD                                    | atria                            |
| <i>Kdm5b</i>  | LV-outflow tract abnormalities         | ventricle                        |
