# Supplementary material for: De Novo and Rare Variants at Multiple Loci Support the Oligogenic Origins of Atrioventricular Septal Heart Defects
Source: PubMed Central journal article supplement (PMC4825975; doi:10.1371/journal.pgen.1005963), 2016-04-08
Supplement: pgen.1005963.s017.pdf [file pgen.1005963.s017.pdf]

**Table S10. Ocular Malformation Genes**

AGAP1  
AGT  
ASPA  
CDKN1C  
COMP  
CPOX  
CRX  
CYBA  
EDNRB  
EMD  
ERCC8  
FANCA  
FAS  
GALK1  
GJB1  
GLI3  
GPR143  
GSN  
HPS1  
IDS  
INS  
KRT12  
LEP  
LYST  
MYO7A  
NAGLU  
NDP  
NF1  
NPC1  
NPHP1  
NRL  
OAT  
OTX2  
PAH  
PAX6  
PDE6B  
PEX7  
RAX  
SGSH  
SIX3  
SIX6  
VAX1  
VSX2
